# Supplementary material for: Mother-Specific Signature in the Maternal Transcriptome Composition of Mature, Unfertilized Zebrafish Eggs
Source: PLoS One. 2016 Jan 22;11(1):e0147151. doi: 10.1371/journal.pone.0147151 (PMC4723340; doi:10.1371/journal.pone.0147151)
Supplement: S9 File — (XLSX) [file pone.0147151.s012.xlsx]

## Sheet: Clusters_co_0_2+
ProbeID	Designed_on	Cross_hybs	cross_only	Cross_hybs_ids	is_subseq	Direction	TC	REFSEQ	REFSEQ_s	refseq.symb	MERGED_ENSG	ENTREZ	refseq.descr	unigene	unigene.symb	unigene.descr	Gene.Name	zfin	zfin_descr	Mother 1	Mother 2	Mother 3	Mother 4	Mother 5	ncluster	code	Chromosome	Start position	Stop position
MAD_Dr_004_167498	NM_130921.2 ; Dr.76380 ; OTTDART00000022421 ; ENSDART00000051186	0	1		0	1	50226	NM_130921.2	NM_130921	nccrp1	ENSDARG00000035326	30078	nonspecific cytotoxic cell receptor protein 1	Dr.76380	nccrp1	nonspecific cytotoxic cell receptor protein 1	nonspecific cytotoxic cell receptor protein 1	ZDB-GENE-000210-13	nccrp1	4	4	3	2	1	4	44321	5	36250497	36254402
MAD_Dr_004_140162	ENSDART00000050379	0	-	-	0	1	13964	NA	NA	NA	ENSDARG00000018559	-	NA	NA	NA	NA	im:7141664	ZDB-GENE-050309-32	kdm7ab	4	4	3	1	2	4	44312	25	17148132	17213901
MAD_Dr_004_502358	ENSDART00000105636	3	0	gi|502358 ; gi|184083 ; gi|180693	1	1	-2	NA	NA	NA	ENSDARG00000071445	436720	NA	NA	NA	NA	zgc:92347	ZDB-GENE-040718-146	myoz1b	4	3	4	1	2	4	43412	12	26293886	26317516
MAD_Dr_004_109931	NM_213400.1	0	-	-	0	1	110194	NM_213400.1	NM_213400	fam136a	ENSDARG00000040148	406709	family with sequence similarity 136, member A	NA	NA	NA	family with sequence similarity 136, member A	ZDB-GENE-040426-2729	fam136a	4	2	4	1	3	4	42413	NA	NA	NA
MAD_Dr_004_191081	ENSDART00000113088	2	0	ENSDART00000109128 ; Dr.152584	0	1	90130	NA	NA	NA	ENSDARG00000079654	553279	NA	NA	NA	NA	ST3 beta-galactoside alpha-2,3-sialyltransferase 1	ZDB-GENE-060321-1	st3gal1	4	2	1	4	3	4	42143	19	4857224	4876847
MAD_Dr_004_122746	OTTDART00000030071	0	-	-	0	1	123224	NA	NA	NA	ENSDARG00000095158	-	NA	NA	NA	NA	NA	ZDB-GENE-070705-52	si:ch211-155a19.2	4	2	1	4	3	4	42143	7	43517966	43519799
MAD_Dr_004_192478	NM_001045373.1 ; Dr.85498	2	1	OTTDART00000044021 ; ENSDART00000100892	0	1	92163	NM_001045373.1	NM_001045373	crcp	ENSDARG00000069373	751656	calcitonin gene-related peptide-receptor component	Dr.85498	crcp	calcitonin gene-related peptide-receptor component	calcitonin gene-related peptide-receptor component protein	ZDB-GENE-060825-150	crcp	4	1	2	4	3	4	41243	21	31207785	31215463
MAD_Dr_004_178101	ENSDART00000074173	4	0	ENSDART00000065821 ; ENSDART00000013506 ; NM_001109741.1 ; Dr.45135	0	1	66357	NA	NA	NA	ENSDARG00000089352	574007	NA	NA	NA	NA	zona pellucida glycoprotein 3.2	ZDB-GENE-050626-121	zp3.2	4	1	2	4	3	4	41243	NA	NA	NA
MAD_Dr_004_158591	OTTDART00000029312	0	-	-	0	1	37636	NA	NA	NA	ENSDARG00000032263	550335	NA	NA	NA	NA	NA	ZDB-GENE-050417-120	zgc:110224	4	1	2	4	3	4	41243	21	30685038	30706157
MAD_Dr_004_158165	ENSDART00000008043	1	1	NM_001001845.1	0	1	37	NA	NA	NA	ENSDARG00000021137	415105	NA	NA	NA	NA	G protein-coupled receptor 98	ZDB-GENE-040624-6	gpr98	3	4	2	1	2	4	34212	5	48031936	48288616
MAD_Dr_004_191547	OTTDART00000022773	1	1	XM_681983.2	0	1	90778	NA	NA	NA	ENSDARG00000052247	553475	NA	NA	NA	NA	hypothetical protein LOC553475	ZDB-GENE-060526-275	alkbh4	3	4	1	2	3	4	34123	5	60782897	60788045
MAD_Dr_004_150678	ENSDART00000050357	3	1	XM_685252.3 ; Dr.87957 ; NM_001076619.1	0	1	25395	NA	NA	NA	ENSDARG00000051809	-	NA	NA	NA	NA	bloodthirsty-related gene family, member 12	ZDB-GENE-060929-548	btr12	3	3	4	2	1	4	33421	7	73448024	73463742
MAD_Dr_004_142625	OTTDART00000043448	2	0	Dr.45462 ; XM_001344699.1	0	1	14648	NA	NA	NA	ENSDARG00000091271	562197	NA	NA	NA	NA	NA	ZDB-GENE-030131-3256	si:ch211-225g23.1	3	3	3	2	1	3	33321	21	6289421	6312591
MAD_Dr_004_161373	OTTDART00000012136	0	-	-	0	1	41437	NA	NA	NA	ENSDARG00000025206	567877	NA	NA	NA	NA	NA	ZDB-GENE-060503-315	syt2a	3	3	3	2	1	3	33321	23	6298919	6379836
MAD_Dr_004_181634	ENSDART00000065234	1	0	NM_001020693.1	0	1	72376	NA	NA	NA	ENSDARG00000031150	553722	NA	NA	NA	NA	zgc:112375	ZDB-GENE-050522-351	gba3	3	3	3	1	2	3	33312	7	69887854	69894805
MAD_Dr_004_192816	OTTDART00000036154	2	0	OTTDART00000036155 ; Dr.139358	0	1	92596	NA	NA	NA	ENSDARG00000092351	-	NA	NA	NA	NA	NA	ZDB-GENE-081104-314	si:dkey-149f22.2	3	3	3	1	2	3	33312	8	48525782	48538777
MAD_Dr_004_117307	NM_001018140.1 ; Dr.81454 ; OTTDART00000025713 ; ENSDART00000005239	0	1		0	1	11789	NM_001018140.1	NM_001018140	dnmt6	ENSDARG00000015566	553189	DNA (cytosine-5-)-methyltransferase 6	Dr.81454	dnmt6	DNA (cytosine-5-)-methyltransferase 6	DNA (cytosine-5-)-methyltransferase 6	ZDB-GENE-050314-3	dnmt3ab	3	3	3	1	2	3	33312	17	36991995	37107374
MAD_Dr_004_179809	ENSDART00000087099	0	-	-	0	1	6902	NA	NA	NA	ENSDARG00000076821	-	NA	NA	NA	NA	NA	ZDB-GENE-080416-2	myom1b	3	3	3	1	2	3	33312	NA	NA	NA
MAD_Dr_004_501475	ENSDART00000058959	2	0	gi|501475 ; gi|185866	1	1	-2	NA	NA	NA	ENSDARG00000097789	568655	NA	NA	NA	NA	zgc:112374	NA	NA	3	3	2	1	3	3	33213	16	24741926	24746494
MAD_Dr_004_151003	ENSDART00000073416	4	0	OTTDART00000026945 ; XM_001918521.1 ; Dr.77275 ; NM_001033717.2	0	1	25828	NA	NA	NA	ENSDARG00000051746	373884	NA	NA	NA	NA	cat eye syndrome chromosome region, candidate 1a; hypothetical LOC100000645	ZDB-GENE-030902-4	cecr1a	3	3	2	1	2	3	33212	25	16593233	16604524
MAD_Dr_004_151101	OTTDART00000026848	2	0	Dr.26707 ; NM_200118.1	0	1	25969	NA	NA	NA	ENSDARG00000021110	386932	NA	NA	NA	NA	WD repeat domain 51B	ZDB-GENE-031118-54	poc1b	3	3	2	1	2	3	33212	25	18270578	18339081
MAD_Dr_004_153331	ENSDART00000089516	3	1	OTTDART00000038766 ; Dr.32699 ; NM_001082980.1	0	1	29061	NA	NA	NA	ENSDARG00000062142	563294	NA	NA	NA	NA	wu:fd21f07; zgc:158861	ZDB-GENE-070209-241	stoml1	3	3	2	1	2	3	33212	25	22183893	22195353
MAD_Dr_004_173180	NM_001076602.1	0	-	-	0	1	58948	NM_001076602.1	NM_001076602	zgc:153036	ENSDARG00000059805	767662	zgc:153036	NA	NA	NA	zgc:153036	ZDB-GENE-060929-320	slc25a38a	3	3	2	1	2	3	33212	3	4733901	4753472
MAD_Dr_004_116170	OTTDART00000034189	0	-	-	0	1	116586	NA	NA	NA	ENSDARG00000091901	8388607	NA	NA	NA	NA	NA	ZDB-GENE-070912-479	si:dkey-25c4.1	3	3	2	1	2	3	33212	20	8806763	8847355
MAD_Dr_004_196845	Dr.117113	1	0	ENSDART00000108699	0	1	97158	NA	NA	NA	ENSDARG00000074312	100141351	NA	Dr.117113	zgc:171846	zgc:171846	zgc:171846	ZDB-GENE-060810-187	coa3	3	3	1	4	2	4	33142	NA	NA	NA
MAD_Dr_004_109574	NM_001002544.1	3	1	ENSDART00000103573 ; ENSDART00000053201 ; XM_001330865.1	0	1	109837	NM_001002544.1	NM_001002544	zgc:92790	ENSDARG00000036625	436817	zgc:92790	NA	NA	NA	zgc:92790; hypothetical LOC791979	ZDB-GENE-040718-279	polr2f	3	3	1	3	2	3	33132	3	2032082	2041540
MAD_Dr_004_503138	NM_001003596.1	3	0	gi|503138 ; gi|189051 ; gi|180213	1	1	-2	NM_001003596.1	NM_001003596	dpm1	ENSDARG00000057011	445202	dolichyl-phosphate mannosyltransferase polypeptide	NA	NA	NA	dolichyl-phosphate mannosyltransferase polypeptide 1, catalytic subunit	ZDB-GENE-040801-115	dpm1	3	3	1	3	2	3	33132	23	20586740	20591648
MAD_Dr_004_177951	ENSDART00000031966	1	1	XM_690543.3	0	1	66148	NA	NA	NA	ENSDARG00000022777	-	NA	NA	NA	NA	NA	NA	NA	3	3	1	3	2	3	33132	NA	NA	NA
MAD_Dr_004_102410	OTTDART00000006672	1	1	Dr.83707	0	1	102542	NA	NA	NA	ENSDARG00000029587	793910	NA	NA	NA	NA	si:dkey-221h15.1	ZDB-GENE-041014-344	si:dkey-221h15.1	3	3	1	2	3	3	33123	20	39007335	39143302
MAD_Dr_004_181442	OTTDART00000031925	3	1	ENSDART00000054334 ; Dr.133212 ; NM_001122629.1	0	1	72100	NA	NA	NA	ENSDARG00000037345	8388607	NA	NA	NA	NA	NA	NA	NA	3	3	1	2	3	3	33123	NA	NA	NA
MAD_Dr_004_178133	NM_001109868.1	1	0	ENSDART00000089961	0	1	66408	NM_001109868.1	NM_001109868	sik2a	ENSDARG00000079618	100126142	salt-inducible kinase 2a	NA	NA	NA	salt-inducible kinase 2a	ZDB-GENE-070705-451	sik2a	3	3	1	2	3	3	33123	5	57143946	57209081
MAD_Dr_004_182109	OTTDART00000024830	0	-	-	0	1	73287	NA	NA	NA	ENSDARG00000045733	445283	NA	NA	NA	NA	NA	ZDB-GENE-040808-57	ciapin1	3	3	1	2	3	3	33123	25	14302099	14310331
MAD_Dr_004_155560	OTTDART00000039143	0	-	-	0	1	33333	NA	NA	NA	ENSDARG00000009046	8388607	NA	NA	NA	NA	NA	ZDB-GENE-060929-1234	nphp1	3	3	1	2	2	3	33122	17	22052501	22071305
MAD_Dr_004_164634	NM_001045268.1 ; Dr.133296	3	0	ENSDART00000047579 ; ENSDART00000080334 ; OTTDART00000008828	0	1	46020	NM_001045268.1	NM_001045268	yaf2	ENSDARG00000015966	692296	YY1 associated factor 2	Dr.133296	yaf2	YY1 associated factor 2	YY1 associated factor 2	ZDB-GENE-041210-115	yaf2	3	3	1	2	2	3	33122	4	13906673	13922357
MAD_Dr_004_167996	NM_201511.1 ; Dr.133560 ; OTTDART00000005959	0	1		0	1	50952	NM_201511.1	NM_201511	cyp2j21	ENSDARG00000042990	399485	cytochrome P450, family 2, subfamily J, polypeptid	Dr.133560	cyp2j21	cytochrome P450, family 2, subfamily J, polypeptid	cytochrome P450, family 2, subfamily J, polypeptid	ZDB-GENE-040120-1	cyp2p10	3	3	1	1	2	3	33112	20	25687145	25694517
MAD_Dr_004_188491	ENSDART00000022758	2	1	Dr.11469 ; NM_200054.1	0	1	8314	NA	NA	NA	ENSDARG00000016513	337193	NA	NA	NA	NA	SET domain containing 3	ZDB-GENE-030131-9137	setd3	3	3	1	1	2	3	33112	17	18012051	18050951
MAD_Dr_004_180983	NM_200293.2 ; Dr.81714	1	1	ENSDART00000098119	0	1	71105	NM_200293.2	NM_200293	zgc:56488	ENSDARG00000037172	393263	zgc:56488	Dr.81714	zgc:56488	zgc:56488	zgc:56488	ZDB-GENE-040426-1050	ddrgk1	3	2	4	1	3	4	32413	5	1461624	1469404
MAD_Dr_004_150475	NM_001135144.1	1	0	NM_001037407.1	0	1	25100	NM_001135144.1	NM_001135144	NA	ENSDARG00000078476	100189617	NA	NA	NA	NA	hypothetical zinc finger protein LOC100189617; zgc:123008; similar to Zinc finger protein 91 (Zinc finger protein HTF10) (HPF7)	ZDB-GENE-050208-409	si:dkey-253d23.7	3	2	4	1	2	4	32412	22	9869418	9872106
MAD_Dr_004_107057	ENSDART00000097276 ; OTTDART00000039839	2	0	XM_001919973.1 ; OTTDART00000039848	0	1	107247	NA	NA	NA	ENSDARG00000077115	-	NA	NA	NA	NA	NA	ZDB-GENE-081104-289	si:ch73-44m9.1	3	2	4	1	2	4	32412	22	7768018	7780135
MAD_Dr_004_160244	OTTDART00000029457	0	-	-	0	1	39944	NA	NA	NA	ENSDARG00000021220	394190	NA	NA	NA	NA	NA	ZDB-GENE-040426-958	hmgcl	3	2	3	2	1	3	32321	17	24837277	24848326
MAD_Dr_004_102052	NM_001002503.1	1	0	Dr.109068	0	1	102176	NM_001002503.1	NM_001002503	ndfip1l	ENSDARG00000008057	436776	Nedd4 family interacting protein 1, like	NA	NA	NA	Nedd4 family interacting protein 1, like	ZDB-GENE-040718-207	ndfip1l	3	2	3	1	3	3	32313	NA	NA	NA
MAD_Dr_004_132071	Dr.110026	0	-	-	0	1	1317	NA	NA	NA	ENSDARG00000078758	566868	NA	Dr.110026	scn12ab	sodium channel, voltage gated, type VIII, alpha b	sodium channel, voltage gated, type VIII, alpha b; wu:fi13c05	ZDB-GENE-060908-3	scn12ab	3	2	3	1	3	3	32313	NA	NA	NA
MAD_Dr_004_148346	XM_678698.3 ; Dr.40469	1	1	OTTDART00000011549	0	1	2225	XM_678698.3	XM_678698	NA	ENSDARG00000024964	368723	NA	Dr.40469	inadl	InaD-like (Drosophila)	InaD-like (Drosophila); novel protein similar to vertebrate InaD-like protein (INADL)	ZDB-GENE-030616-129	inadl	3	2	3	1	3	3	32313	22	16542853	16732703
MAD_Dr_004_153886	OTTDART00000030478	0	-	-	0	1	30200	NA	NA	NA	ENSDARG00000068814	8388607	NA	NA	NA	NA	NA	ZDB-GENE-070705-402	spata2l	3	2	3	1	3	3	32313	18	14715603	14719926
MAD_Dr_004_193087	OTTDART00000028685	9	0	OTTDART00000028686 ; NM_001109856.1 ; Dr.148777 ; NM_198824.2 ; OTTDART00000037650 ; ENSDART00000099030 ; OTTDART00000042941 ; OTTDART00000042942 ; NM_001109853.1	0	1	92953	NA	NA	NA	ENSDARG00000068465	678590	NA	NA	NA	NA	NA	ZDB-GENE-060421-3062	zgc:136254	3	2	3	1	2	3	32312	10	8086664	8088064
MAD_Dr_004_194008	OTTDART00000037650	9	0	NM_001109856.1 ; Dr.148777 ; NM_198824.2 ; ENSDART00000099030 ; OTTDART00000042941 ; OTTDART00000042942 ; OTTDART00000028685 ; OTTDART00000028686 ; NM_001109853.1	0	1	94069	NA	NA	NA	ENSDARG00000034403	-	NA	NA	NA	NA	NA	ZDB-GENE-081028-39	si:ch211-251f6.3	3	2	3	1	2	3	32312	10	8119269	8121037
MAD_Dr_004_175107	OTTDART00000020816	2	1	Dr.89953 ; XM_695180.3	0	1	61765	NA	NA	NA	ENSDARG00000071644	571577	NA	NA	NA	NA	hypothetical LOC571577	ZDB-GENE-060503-903	si:dkey-19a16.7	3	2	3	1	2	3	32312	22	6457713	6469209
MAD_Dr_004_164435	NM_001110128.1 ; Dr.89561	1	1	ENSDART00000105864	0	1	45728	NM_001110128.1	NM_001110128	zgc:171500	ENSDARG00000071553	100006475	zgc:171500	Dr.89561	zgc:171500	zgc:171500	zgc:171500	ZDB-GENE-080204-9	zgc:171500	3	2	3	1	2	3	32312	22	6902448	6911305
MAD_Dr_004_175150	OTTDART00000013202	0	-	-	0	1	61826	NA	NA	NA	ENSDARG00000055505	378480	NA	NA	NA	NA	platelet-derived growth factor alpha a	ZDB-GENE-030918-2	pdgfaa	3	2	3	1	2	3	32312	22	25971126	26080385
MAD_Dr_004_141271	ENSDART00000112520 ; ENSDART00000110145	0	1		0	1	140805	NA	NA	NA	ENSDARG00000078862	100136853	NA	NA	NA	NA	zgc:175274	ZDB-GENE-080204-94	pigw	3	2	2	1	3	3	32213	NA	NA	NA
MAD_Dr_004_184865	OTTDART00000008008	1	0	NM_001002071.1	0	1	77560	NA	NA	NA	ENSDARG00000039945	415161	NA	NA	NA	NA	sirtuin (silent mating type information regulation 2 homolog) 6 (S. cerevisiae)	ZDB-GENE-031007-2	sirt6	3	2	2	1	3	3	32213	NA	NA	NA
MAD_Dr_004_178003	ENSDART00000077829	1	1	OTTDART00000036777	0	1	66214	NA	NA	NA	ENSDARG00000055477	394111	NA	NA	NA	NA	pelota homolog (Drosophila)	ZDB-GENE-040426-1074	pelo	3	2	2	1	3	3	32213	12	13150313	13167551
MAD_Dr_004_185866	OTTDART00000028552	0	-	-	0	1	79080	NA	NA	NA	ENSDARG00000040290	554122	NA	NA	NA	NA	NA	ZDB-GENE-050522-353	pon3	3	2	2	1	3	3	32213	16	24741930	24753588
MAD_Dr_004_504201	OTTDART00000031300	5	1	gi|504202 ; gi|504201 ; gi|175459 ; gi|173171 ; gi|102249	1	1	-2	NA	NA	NA	ENSDARG00000019924	406383	NA	NA	NA	NA	NA	ZDB-GENE-040426-2113	cmpk	3	2	2	1	3	3	32213	2	10265927	10279109
MAD_Dr_004_126175	Dr.94152 ; NM_001083857.1 ; ENSDART00000100845	0	1		0	1	126266	NM_001083857.1	NM_001083857	NA	ENSDARG00000058414	100333884	NA	Dr.94152	NA	NA	bone gamma-carboxyglutamate (gla) protein	ZDB-GENE-050113-4	bglap	3	2	2	1	2	3	32212	3	1648399	1651382
MAD_Dr_004_159746	ENSDART00000104072	1	1	OTTDART00000037383	0	1	39253	NA	NA	NA	ENSDARG00000070698	559966	NA	NA	NA	NA	kelch repeat and BTB (POZ) domain containing 8	ZDB-GENE-030114-8	kbtbd8	3	2	2	1	1	3	32211	11	16439990	16453409
MAD_Dr_004_166053	ENSDART00000011030	0	-	-	0	1	48144	NA	NA	NA	ENSDARG00000007743	-	NA	NA	NA	NA	interleukin 15, like	ZDB-GENE-041111-173	il15l	3	2	2	1	1	3	32211	15	20416391	20427799
MAD_Dr_004_156990	OTTDART00000008411 ; NM_200897.1 ; Dr.70350 ; ENSDART00000019508	1	1	OTTDART00000029921	0	1	35315	NM_200897.1	NM_200897	csrp2	ENSDARG00000011961	393871	cysteine and glycine-rich protein 2	Dr.70350	csrp2	cysteine and glycine-rich protein 2	cysteine and glycine-rich protein 2	ZDB-GENE-040426-1863	csrp2	3	2	2	1	1	3	32211	4	2581518	2595823
MAD_Dr_004_125937	NM_001076762.2	1	1	OTTDART00000009260	0	1	126065	NM_001076762.2	NM_001076762	si:ch211-239e6.4	ENSDARG00000045551	563220	si:ch211-239e6.4	NA	NA	NA	si:ch211-239e6.4	ZDB-GENE-041210-170	si:ch211-239e6.4	3	2	1	4	4	4	32144	NA	NA	NA
MAD_Dr_004_103370	XM_001333783.2	2	0	ENSDART00000054069 ; Dr.41995	0	1	103503	XM_001333783.2	XM_001333783	NA	ENSDARG00000037181	794963	NA	NA	NA	NA	UPF0184 protein C9orf16 homolog	NA	NA	3	2	1	3	3	3	32133	NA	NA	NA
MAD_Dr_004_149979	NM_213532.1 ; Dr.79921 ; ENSDART00000024872	0	1		0	1	24407	NM_213532.1	NM_213532	creb3l3l	ENSDARG00000020926	406853	cAMP responsive element binding protein 3-like 3 l	Dr.79921	creb3l3l	cAMP responsive element binding protein 3-like 3 l	cAMP responsive element binding protein 3-like 3 l	ZDB-GENE-040426-2942	creb3l3l	3	2	1	3	3	3	32133	8	31365887	31375388
MAD_Dr_004_151026	ENSDART00000066894	0	-	-	0	1	25861	NA	NA	NA	ENSDARG00000045484	568176	NA	NA	NA	NA	DCP1 decapping enzyme homolog B (S. cerevisiae)	ZDB-GENE-040819-1	dcp1b	3	2	1	3	3	3	32133	4	20581853	20593773
MAD_Dr_004_161104	OTTDART00000018115 ; ENSDART00000027697 ; NM_001045182.1 ; Dr.15450	0	1		0	1	41055	NM_001045182.1	NM_001045182	serinc2	ENSDARG00000056532	569338	serine incorporator 2	Dr.15450	serinc2	serine incorporator 2	serine incorporator 2	ZDB-GENE-041111-296	serinc2	3	2	1	3	3	3	32133	19	15504001	15516356
MAD_Dr_004_168772	NM_200537.1 ; Dr.15870	1	0	ENSDART00000047570	0	1	52077	NM_200537.1	NM_200537	mboat7	ENSDARG00000033436	393509	membrane bound O-acyltransferase domain containing	Dr.15870	mboat7	membrane bound O-acyltransferase domain containing	membrane bound O-acyltransferase domain containing 7	ZDB-GENE-040426-1516	mboat7	3	2	1	3	3	3	32133	16	32060522	32072303
MAD_Dr_004_170661	NM_001033742.1 ; Dr.46030 ; OTTDART00000028046 ; ENSDART00000063750	0	1		0	1	55015	NM_001033742.1	NM_001033742	b3gntl1	ENSDARG00000043431	619261	UDP-GlcNAc:betaGal beta-1,3-N-acetylglucosaminyltr	Dr.46030	b3gntl1	UDP-GlcNAc:betaGal beta-1,3-N-acetylglucosaminyltr	UDP-GlcNAc:betaGal beta-1,3-N-acetylglucosaminyltr	ZDB-GENE-050913-133	b3gntl1	3	2	1	3	3	3	32133	1	56632801	56649965
MAD_Dr_004_173451	NM_001044880.2	0	-	-	0	1	59337	NM_001044880.2	NM_001044880	fam84b	ENSDARG00000032859	767732	family with sequence similarity 84, member B	NA	NA	NA	zgc:153371	ZDB-GENE-060929-1130	fam84b	3	2	1	3	3	3	32133	19	33552044	33553283
MAD_Dr_004_177398	OTTDART00000033662 ; ENSDART00000111634 ; NM_001126435.1	1	1	Dr.116577	0	1	65224	NM_001126435.1	NM_001126435	wdr4	ENSDARG00000074007	570351	WD repeat domain 4	NA	NA	NA	si:ch211-140m22.6	ZDB-GENE-060810-10	wdr4	3	2	1	3	3	3	32133	NA	NA	NA
MAD_Dr_004_185837	ENSDART00000097338	4	0	XM_001918623.1 ; OTTDART00000022815 ; Dr.15900 ; NM_001083561.2	0	1	79036	NA	NA	NA	ENSDARG00000067605	567306	NA	NA	NA	NA	hypothetical protein LOC100150339; si:dkeyp-117b8.3	ZDB-GENE-060531-160	napaa	3	2	1	3	3	3	32133	5	61268600	61279745
MAD_Dr_004_104629	OTTDART00000013680	0	-	-	0	1	104776	NA	NA	NA	ENSDARG00000043467	562219	NA	NA	NA	NA	si:dkey-6n6.4	ZDB-GENE-050309-25	ndufb11	3	2	1	3	3	3	32133	8	14142359	14146718
MAD_Dr_004_115660	OTTDART00000035437	1	1	XM_680552.2	0	1	116090	NA	NA	NA	ENSDARG00000079276	-	NA	NA	NA	NA	NA	NA	NA	3	2	1	3	3	3	32133	19	28372786	28382754
MAD_Dr_004_116869	OTTDART00000043457	3	1	OTTDART00000043458 ; OTTDART00000043461 ; Dr.111655	0	1	117390	NA	NA	NA	ENSDARG00000092967	-	NA	NA	NA	NA	NA	ZDB-GENE-091204-318	si:dkey-93m18.4	3	2	1	3	3	3	32133	21	6100707	6103808
MAD_Dr_004_145045	NM_131719.1 ; Dr.105878	2	0	ENSDART00000079210 ; OTTDART00000044693	0	1	17815	NM_131719.1	NM_131719	cdk5	ENSDARG00000056683	65234	cyclin-dependent protein kinase 5	Dr.105878	cdk5	cyclin-dependent protein kinase 5	cyclin-dependent protein kinase 5	ZDB-GENE-010131-2	cdk5	3	2	1	3	3	3	32133	24	33686326	33894218
MAD_Dr_004_159572	ENSDART00000023971	0	-	-	0	1	39018	NA	NA	NA	ENSDARG00000005392	561445	NA	NA	NA	NA	solute carrier family 5 (sodium iodide symporter),	ZDB-GENE-060503-585	slc5a5	3	2	1	3	3	3	32133	8	13327245	13344646
MAD_Dr_004_159923	ENSDART00000115034	2	1	Dr.68370 ; XM_001920406.1	0	1	3951	NA	NA	NA	ENSDARG00000074747	-	NA	NA	NA	NA	im:7140700	ZDB-GENE-041111-120	brwd1	3	2	1	3	3	3	32133	15	5841142	5904882
MAD_Dr_004_185703	ENSDART00000058565	4	1	Dr.82002 ; NM_001005941.1 ; OTTDART00000027259 ; OTTDART00000027260	0	1	78814	NA	NA	NA	ENSDARG00000040039	449768	NA	NA	NA	NA	pituitary tumor-transforming 1 interacting protein	ZDB-GENE-041010-10	pttg1ipb	3	2	1	3	3	3	32133	9	12684075	12687937
MAD_Dr_004_193028	OTTDART00000034900	0	-	-	0	1	92879	NA	NA	NA	ENSDARG00000076632	-	NA	NA	NA	NA	NA	ZDB-GENE-081104-40	zdhhc12a	3	2	1	3	3	3	32133	8	2536881	2544029
MAD_Dr_004_501289	ENSDART00000044426	3	1	gi|501289 ; gi|186557 ; gi|104232	1	1	-2	NA	NA	NA	ENSDARG00000034210	555536	NA	NA	NA	NA	NA	ZDB-GENE-070705-406	si:dkey-240h12.4	3	2	1	3	3	3	32133	19	11249291	11290784
MAD_Dr_004_193241	OTTDART00000001440	1	0	XM_001337290.1	0	1	93189	NA	NA	NA	ENSDARG00000068284	368731	NA	NA	NA	NA	si:ch211-242m24.6	ZDB-GENE-030616-155	ccdc157	3	2	1	3	3	3	32133	NA	NA	NA
MAD_Dr_004_137414	OTTDART00000035887	0	-	-	0	1	13691	NA	NA	NA	ENSDARG00000079327	565032	NA	NA	NA	NA	NA	ZDB-GENE-030131-9765	hmcn2	3	2	1	3	3	3	32133	8	32604404	32776436
MAD_Dr_004_150581	NM_001109715.1	0	-	-	0	1	25245	NM_001109715.1	NM_001109715	zgc:165534	ENSDARG00000075149	569719	zgc:165534	NA	NA	NA	zgc:165534	ZDB-GENE-070928-4	zgc:165534	3	2	1	3	3	3	32133	16	40558850	40591949
MAD_Dr_004_169031	OTTDART00000040683	0	-	-	0	1	52449	NA	NA	NA	ENSDARG00000029100	557606	NA	NA	NA	NA	NA	ZDB-GENE-060810-176	chchd1	3	2	1	3	3	3	32133	13	21637997	21646228
MAD_Dr_004_177907	ENSDART00000048819	1	1	OTTDART00000028677	0	1	66090	NA	NA	NA	ENSDARG00000029865	447938	NA	NA	NA	NA	Ras association (RalGDS/AF-6) domain family member	ZDB-GENE-040912-124	rassf2a	3	2	1	3	3	3	32133	8	42992157	43042282
MAD_Dr_004_149773	NM_199713.1 ; Dr.116048	2	1	ENSDART00000101655 ; OTTDART00000025098	0	1	24138	NM_199713.1	NM_199713	calrl2	ENSDARG00000024973	325317	calreticulin, like 2	Dr.116048	calrl2	calreticulin, like 2	calreticulin, like 2	ZDB-GENE-030131-4042	calr	3	2	1	3	2	3	32132	NA	NA	NA
MAD_Dr_004_150009	ENSDART00000101655	3	1	Dr.116048 ; NM_199713.1 ; OTTDART00000025098	0	1	24446	NA	NA	NA	ENSDARG00000076290	325317	NA	NA	NA	NA	calreticulin, like 2	ZDB-GENE-030131-4042	calr	3	2	1	3	2	3	32132	8	16546627	16556779
MAD_Dr_004_183561	OTTDART00000018797 ; ENSDART00000051751 ; NM_001044779.1	2	0	Dr.38137 ; NM_001013286.1	0	1	75593	NM_001044779.1	NM_001044779	NA	ENSDARG00000035680	554876	NA	NA	NA	NA	NA	ZDB-GENE-050227-9	zgc:113424	3	2	1	3	2	3	32132	19	35410909	35412259
MAD_Dr_004_145498	ENSDART00000110697	1	1	OTTDART00000034539	0	1	18376	NA	NA	NA	ENSDARG00000074727	557858	NA	NA	NA	NA	DnaJ (Hsp40) homolog, subfamily C, member 10	ZDB-GENE-070327-1	dnajc10	3	2	1	2	3	3	32123	9	45069013	45096601
MAD_Dr_004_198512	ENSDART00000067594	2	0	XM_694031.3 ; NM_001077274.1	0	1	98830	NA	NA	NA	ENSDARG00000045980	768128	NA	NA	NA	NA	zgc:153129; hypothetical LOC570536	ZDB-GENE-061013-189	cst14b.1	3	2	1	2	3	3	32123	5	4081428	4091680
MAD_Dr_004_164752	OTTDART00000023006	0	-	-	0	1	46170	NA	NA	NA	ENSDARG00000023927	393424	NA	NA	NA	NA	NA	ZDB-GENE-040426-1153	dnajc24	3	2	1	2	3	3	32123	25	14773625	14834945
MAD_Dr_004_191357	OTTDART00000035440	0	-	-	0	1	90507	NA	NA	NA	ENSDARG00000054255	553323	NA	NA	NA	NA	NA	ZDB-GENE-081104-219	tctex1d2	3	2	1	2	3	3	32123	22	35496904	35502902
MAD_Dr_004_177154	OTTDART00000029728	2	1	ENSDART00000111641 ; ENSDART00000057042	0	1	64879	NA	NA	NA	ENSDARG00000039062	550131	NA	NA	NA	NA	NA	ZDB-GENE-050417-7	morn4	3	2	1	2	2	3	32122	13	40620391	40628609
MAD_Dr_004_146787	OTTDART00000034837 ; ENSDART00000083322	2	1	Dr.81354 ; NM_200599.1	0	1	20004	NA	NA	NA	ENSDARG00000016187	393571	NA	NA	NA	NA	CXXC finger 1, like	ZDB-GENE-040426-1142	cxxc1a	3	2	1	2	2	3	32122	NA	NA	NA
MAD_Dr_004_124590	OTTDART00000035308	4	1	Dr.87126 ; XM_001342202.2 ; ENSDART00000091612 ; OTTDART00000035002	0	1	125098	NA	NA	NA	ENSDARG00000069484	-	NA	NA	NA	NA	NA	ZDB-GENE-081104-516	dab2ipa	3	2	1	1	1	3	32111	8	12096224	12252957
MAD_Dr_004_173950	NM_001109741.1	2	0	ENSDART00000013506 ; Dr.45135	0	1	60063	NM_001109741.1	NM_001109741	NA	ENSDARG00000003371	100007710	NA	NA	NA	NA	hypothetical protein LOC100148225; similar to Zona pellucida glycoprotein 3.2	NA	NA	3	1	5	2	4	5	31524	NA	NA	NA
MAD_Dr_004_182285	NM_001020691.1	0	-	-	0	1	73577	NM_001020691.1	NM_001020691	zgc:112365	ENSDARG00000071164	553720	zgc:112365	NA	NA	NA	zgc:112365	ZDB-GENE-050522-196	alkbh1	3	1	4	3	2	4	31432	17	17745143	17755767
MAD_Dr_004_125820	OTTDART00000015194	2	1	ENSDART00000100135 ; Dr.84616	0	1	125944	NA	NA	NA	ENSDARG00000092364	8388607	NA	NA	NA	NA	NA	ZDB-GENE-050419-103	si:ch211-218c6.8	3	1	4	2	3	4	31423	18	16997429	17000651
MAD_Dr_004_174165	NM_001083812.2 ; Dr.77474	1	1	OTTDART00000026482	0	1	6037	NM_001083812.2	NM_001083812	ell2	ENSDARG00000006251	322997	elongation factor, RNA polymerase II, 2	Dr.77474	ell2	elongation factor, RNA polymerase II, 2	elongation factor, RNA polymerase II, 2	ZDB-GENE-030131-1717	ell2	3	1	3	3	2	3	31332	21	11656469	11682336
MAD_Dr_004_140785	NM_001111200.1 ; ENSDART00000083719	0	1		0	1	14036	NM_001111200.1	NM_001111200	zgc:175152	ENSDARG00000059871	569903	zgc:175152	NA	NA	NA	zgc:175152	ZDB-GENE-080220-52	shrprbck1r	3	1	3	3	2	3	31332	7	39788981	39811036
MAD_Dr_004_143836	NM_199824.1 ; Dr.70549 ; ENSDART00000099121	0	1		0	1	16229	NM_199824.1	NM_199824	arl8	ENSDARG00000094709	327551	ADP-ribosylation factor-like 8	Dr.70549	arl8	ADP-ribosylation factor-like 8	ADP-ribosylation factor-like 8	ZDB-GENE-030131-5762	arl8	3	1	3	3	2	3	31332	7	41435821	41446584
MAD_Dr_004_154958	OTTDART00000028263	0	-	-	0	1	31709	NA	NA	NA	ENSDARG00000053483	541322	NA	NA	NA	NA	NA	ZDB-GENE-050320-9	zgc:113054	3	1	3	3	2	3	31332	6	43452685	43477221
MAD_Dr_004_190140	ENSDART00000034414	1	1	ENSDART00000106357	0	1	88877	NA	NA	NA	ENSDARG00000077085	-	NA	NA	NA	NA	zgc:110821	ZDB-GENE-050227-8	zgc:110821	3	1	3	2	3	3	31323	22	2566614	2643228
MAD_Dr_004_111076	OTTDART00000006558	0	-	-	0	1	111357	NA	NA	NA	ENSDARG00000008593	556592	NA	NA	NA	NA	NA	ZDB-GENE-041014-367	nbas	3	1	3	2	3	3	31323	20	32933033	33272020
MAD_Dr_004_190102	NM_001113659.1 ; Dr.132816	0	1		0	1	88841	NM_001113659.1	NM_001113659	zgc:198419	ENSDARG00000078342	100170833	zgc:198419	Dr.132816	zgc:194125	zgc:194125	zgc:194125	ZDB-GENE-080722-16	zgc:194125	3	1	3	2	3	3	31323	NA	NA	NA
MAD_Dr_004_172329	ENSDART00000103239	0	-	-	0	1	57630	NA	NA	NA	ENSDARG00000070391	556934	NA	NA	NA	NA	zgc:163023	ZDB-GENE-070410-127	tspan4b	3	1	3	2	3	3	31323	3	32455296	32464680
MAD_Dr_004_100691	ENSDART00000106061	2	0	ENSDART00000097200 ; ENSDART00000059502	0	1	100770	NA	NA	NA	ENSDARG00000091641	-	NA	NA	NA	NA	NA	NA	NA	3	1	3	1	2	3	31312	NA	NA	NA
MAD_Dr_004_191256	ENSDART00000063421	3	1	ENSDART00000106104 ; Dr.91175 ; NM_001020722.1	0	1	90376	NA	NA	NA	ENSDARG00000071648	-	NA	NA	NA	NA	zgc:113298	ZDB-GENE-050522-40	zgc:113298	3	1	3	1	2	3	31312	22	6312935	6332626
MAD_Dr_004_152615	NM_001006045.1 ; Dr.40045 ; ENSDART00000046716	0	1		0	1	28009	NM_001006045.1	NM_001006045	zgc:103418	ENSDARG00000030905	450024	zgc:103418	Dr.40045	zgc:103418	zgc:103418	zgc:103418	ZDB-GENE-041010-141	cited2	3	1	2	5	4	5	31254	20	37012264	37014791
MAD_Dr_004_162117	ENSDART00000058411	0	-	-	0	1	42535	NA	NA	NA	ENSDARG00000039934	-	NA	NA	NA	NA	NA	ZDB-GENE-030131-5333	hlcs	3	1	2	4	4	4	31244	10	53587	59125
MAD_Dr_004_192614	OTTDART00000039939	0	-	-	0	1	92367	NA	NA	NA	ENSDARG00000055722	793849	NA	NA	NA	NA	NA	ZDB-GENE-030131-8039	bco2a	3	1	2	4	4	4	31244	5	29452561	29480179
MAD_Dr_004_153563	OTTDART00000027006	1	0	NM_199212.1	0	1	29645	NA	NA	NA	ENSDARG00000025522	324140	NA	NA	NA	NA	serum/glucocorticoid regulated kinase 1	ZDB-GENE-030131-2860	sgk1	3	1	2	3	3	3	31233	23	31713708	31766778
MAD_Dr_004_100716	OTTDART00000009263	1	1	ENSDART00000066988	0	1	100809	NA	NA	NA	ENSDARG00000045555	606683	NA	NA	NA	NA	NA	ZDB-GENE-041210-173	sco2	3	1	2	3	3	3	31233	4	18464726	18466504
MAD_Dr_004_109194	OTTDART00000045439	0	-	-	0	1	109425	NA	NA	NA	ENSDARG00000091948	-	NA	NA	NA	NA	NA	ZDB-GENE-081104-66	si:ch1073-109g21.1	3	1	2	3	3	3	31233	8	1486179	1586097
MAD_Dr_004_112760	OTTDART00000029433	0	-	-	0	1	113059	NA	NA	NA	ENSDARG00000012336	393290	NA	NA	NA	NA	zgc:56117	ZDB-GENE-040426-909	cog6	3	1	2	3	3	3	31233	NA	NA	NA
MAD_Dr_004_151142	ENSDART00000086335 ; ENSDART00000113903	3	0	OTTDART00000042862 ; Dr.78493 ; NM_001089330.1	0	1	26023	NA	NA	NA	ENSDARG00000060922	-	NA	NA	NA	NA	NA	ZDB-GENE-030131-2843	dgcr14	3	1	2	3	3	3	31233	10	42129209	42279757
MAD_Dr_004_155639	OTTDART00000026582	0	-	-	0	1	33434	NA	NA	NA	ENSDARG00000044513	393171	NA	NA	NA	NA	NA	ZDB-GENE-040316-1	tpst1l	3	1	2	3	3	3	31233	21	31196178	31204559
MAD_Dr_004_159952	ENSDART00000112619	2	1	Dr.70084 ; XM_001919876.1	0	1	39545	NA	NA	NA	ENSDARG00000076153	100151323	NA	NA	NA	NA	NA	ZDB-GENE-090313-268	lca5	3	1	2	3	3	3	31233	23	31453984	31474299
MAD_Dr_004_165744	OTTDART00000024145	0	-	-	0	1	47718	NA	NA	NA	ENSDARG00000015252	407659	NA	NA	NA	NA	NA	ZDB-GENE-050411-13	st3gal3b	3	1	2	3	3	3	31233	2	17595590	17721726
MAD_Dr_004_177254	NM_131323.1	0	-	-	0	1	65028	NM_131323.1	NM_131323	dlx6a	ENSDARG00000042291	30586	distal-less homeobox gene 6a	NA	NA	NA	distal-less homeobox gene 6a	ZDB-GENE-980526-448	dlx6a	3	1	2	3	3	3	31233	19	41834464	41881986
MAD_Dr_004_186275	XM_001331509.1 ; ENSDART00000002778	3	0	OTTDART00000029500 ; Dr.108 ; NM_200400.1	0	1	79671	XM_001331509.1	XM_001331509	NA	ENSDARG00000017687	393371	NA	NA	NA	NA	hypothetical LOC792015; zgc:63689	ZDB-GENE-040426-1238	dnajc5gb	3	1	2	3	3	3	31233	17	6332859	6351176
MAD_Dr_004_187478	ENSDART00000053030	0	-	-	0	1	81367	NA	NA	NA	ENSDARG00000030241	-	NA	NA	NA	NA	von Hippel-Lindau binding protein 1	ZDB-GENE-050522-494	vbp1	3	1	2	3	3	3	31233	7	23616566	23623528
MAD_Dr_004_192454	OTTDART00000041227	0	-	-	0	1	92016	NA	NA	NA	ENSDARG00000024681	402852	NA	NA	NA	NA	NA	ZDB-GENE-040611-4	pane1	3	1	2	3	3	3	31233	1	54483432	54488960
MAD_Dr_004_196683	XM_690820.3	0	-	-	0	1	9699	XM_690820.3	XM_690820	NA	ENSDARG00000086415	-	NA	NA	NA	NA	NA	NA	NA	3	1	2	3	3	3	31233	NA	NA	NA
MAD_Dr_004_122877	OTTDART00000043908	0	-	-	0	1	123347	NA	NA	NA	ENSDARG00000092282	-	NA	NA	NA	NA	NA	ZDB-GENE-091204-366	si:ch211-203l7.3	3	1	2	3	3	3	31233	21	19040602	19098877
MAD_Dr_004_129975	OTTDART00000013707	0	-	-	0	1	129788	NA	NA	NA	ENSDARG00000094276	-	NA	NA	NA	NA	NA	ZDB-GENE-060503-860	si:ch211-165f21.1	3	1	2	3	3	3	31233	7	5440061	5442890
MAD_Dr_004_140211	OTTDART00000002206 ; ENSDART00000066445	0	1		0	1	139824	NA	NA	NA	ENSDARG00000057415	556815	NA	NA	NA	NA	NA	ZDB-GENE-040724-60	nudt13	3	1	2	3	3	3	31233	NA	NA	NA
MAD_Dr_004_169842	ENSDART00000051623	1	1	OTTDART00000019130	0	1	53866	NA	NA	NA	ENSDARG00000035610	550591	NA	NA	NA	NA	zgc:113208	ZDB-GENE-050417-450	zgc:113208	3	1	2	3	3	3	31233	5	22101730	22117617
MAD_Dr_004_182074	XM_001336831.2	0	-	-	0	1	73232	XM_001336831.2	XM_001336831	NA	ENSDARG00000076822	100000713	NA	NA	NA	NA	hypothetical LOC100000713	NA	NA	3	1	2	3	3	3	31233	NA	NA	NA
MAD_Dr_004_151963	NM_001044908.2 ; Dr.80851 ; ENSDART00000105545	2	1	Dr.117331 ; XM_001337494.1	0	1	27085	NM_001044908.2	NM_001044908	si:ch211-208d15.4	ENSDARG00000071409	550525	si:ch211-208d15.4	Dr.80851	si:ch211-208d15.4	si:ch211-208d15.4	si:ch211-208d15.4	ZDB-GENE-030131-7518	arl3	3	1	2	3	2	3	31232	12	33865431	33871815
MAD_Dr_004_182618	XM_685756.3	0	-	-	0	1	74049	XM_685756.3	XM_685756	NA	ENSDARG00000044061	-	NA	NA	NA	NA	NA	NA	NA	3	1	2	3	2	3	31232	6	54488700	54496368
MAD_Dr_004_191836	ENSDART00000041177	0	-	-	0	1	91196	NA	NA	NA	ENSDARG00000028862	555864	NA	NA	NA	NA	NA	ZDB-GENE-131127-122	si:dkey-7k24.6	3	1	2	3	2	3	31232	6	46456534	46472601
MAD_Dr_004_100020	Dr.87684	0	-	-	0	1	100016	NA	NA	NA	ENSDARG00000070362	402821	NA	Dr.87684	cx30.9	connexin 30.9	connexin 30.9	ZDB-GENE-050616-2	cx30.9	3	1	2	2	3	3	31223	19	37531427	37532771
MAD_Dr_004_162798	OTTDART00000034892	0	-	-	0	1	43502	NA	NA	NA	ENSDARG00000038881	406325	NA	NA	NA	NA	NA	ZDB-GENE-040426-1996	acaa2	3	1	2	2	3	3	31223	8	2451082	2471335
MAD_Dr_004_164699	NM_213454.1 ; Dr.151874	0	1		0	1	46100	NM_213454.1	NM_213454	zgc:55574	ENSDARG00000079797	406763	zgc:55574	Dr.151874	zgc:55574	zgc:55574	zgc:55574	ZDB-GENE-040426-2809	tmem117	3	1	2	2	3	3	31223	NA	NA	NA
MAD_Dr_004_181055	ENSDART00000066168	0	-	-	0	1	71262	NA	NA	NA	ENSDARG00000025559	563203	NA	NA	NA	NA	zgc:114079	ZDB-GENE-050913-79	pex11g	3	1	2	2	3	3	31223	11	5606484	5617192
MAD_Dr_004_182415	OTTDART00000043372	2	1	Dr.99479 ; XM_001343005.2	0	1	73754	NA	NA	NA	ENSDARG00000069766	-	NA	NA	NA	NA	NA	ZDB-GENE-091204-251	caln2	3	1	2	2	3	3	31223	21	25899150	25977782
MAD_Dr_004_181393	ENSDART00000085964	1	1	XM_677924.3	0	1	72016	NA	NA	NA	ENSDARG00000060763	555425	NA	NA	NA	NA	NA	NA	NA	3	1	2	2	3	3	31223	NA	NA	NA
MAD_Dr_004_157963	NM_001030110.2 ; OTTDART00000009678	0	1		0	1	36683	NM_001030110.2	NM_001030110	si:dkeyp-89c11.2	ENSDARG00000089159	557184	si:dkeyp-89c11.2	NA	NA	NA	si:dkeyp-89c11.2	ZDB-GENE-041210-202	si:dkeyp-89c11.2	3	1	2	2	2	3	31222	4	25617903	25631536
MAD_Dr_004_502526	ENSDART00000109596	4	1	gi|502526 ; gi|145079 ; gi|145075 ; gi|133483	1	1	-2	NA	NA	NA	ENSDARG00000079420	100301982	NA	NA	NA	NA	dipeptidyl-peptidase 4	ZDB-GENE-081104-277	dpp4	3	1	2	1	1	3	31211	22	11598872	11618640
MAD_Dr_004_164175	NM_199845.1 ; Dr.80559 ; OTTDART00000025079 ; ENSDART00000020386	0	1		0	1	45362	NM_199845.1	NM_199845	gclm	ENSDARG00000018953	333974	glutamate-cysteine ligase, modifier subunit	Dr.80559	gclm	glutamate-cysteine ligase, modifier subunit	glutamate-cysteine ligase, modifier subunit	ZDB-GENE-030131-5906	gclm	3	1	1	4	2	4	31142	8	15231718	15239547
MAD_Dr_004_174476	OTTDART00000029507	0	-	-	0	1	60832	NA	NA	NA	ENSDARG00000027465	553810	NA	NA	NA	NA	NA	ZDB-GENE-050522-21	rmnd1	3	1	1	3	2	3	31132	17	7638381	7661813
MAD_Dr_004_142531	ENSDART00000064826	0	-	-	0	1	14528	NA	NA	NA	ENSDARG00000015829	100334144	NA	NA	NA	NA	NA	ZDB-GENE-091230-8	mov10a	3	1	1	3	2	3	31132	6	48349656	48377486
MAD_Dr_004_184033	NM_200682.2 ; Dr.78530	0	1		0	1	7628	NM_200682.2	NM_200682	zgc:65888	ENSDARG00000003384	393655	zgc:65888	Dr.78530	zgc:65888	zgc:65888	similar to Splicing factor, arginine/serine-rich 17A (Protein XE7) (B-lymphocyte antigen) (721P); zgc:65888	ZDB-GENE-040426-1460	akap17a	3	1	1	3	2	3	31132	NA	NA	NA
MAD_Dr_004_500892	Dr.88110	3	0	gi|503162 ; gi|500892 ; gi|160546	1	1	-2	NA	NA	NA	ENSDARG00000037706	450084	NA	Dr.88110	gss	glutathione synthetase	zgc:101574	ZDB-GENE-041010-208	gss	3	1	1	3	2	3	31132	23	14987010	15013446
MAD_Dr_004_100250	ENSDART00000011876 ; NM_001118894.1 ; Dr.107962	0	1		0	1	10030	NM_001118894.1	NM_001118894	sycp1	ENSDARG00000003904	402797	synaptonemal complex protein 1	Dr.107962	sycp1	synaptonemal complex protein 1	synaptonemal complex protein 1	ZDB-GENE-040910-6	sycp1	3	1	1	3	2	3	31132	6	49054088	49062433
MAD_Dr_004_138599	OTTDART00000035920	1	0	Dr.112331	0	1	138044	NA	NA	NA	ENSDARG00000094865	-	NA	NA	NA	NA	NA	ZDB-GENE-081104-196	si:ch211-244l7.1	3	1	1	3	2	3	31132	8	33613172	33667560
MAD_Dr_004_168615	ENSDART00000082169	0	-	-	0	1	51846	NA	NA	NA	ENSDARG00000059139	570642	NA	NA	NA	NA	NA	ZDB-GENE-121214-175	si:ch73-359p15.2	3	1	1	3	2	3	31132	12	798373	802502
MAD_Dr_004_160832	ENSDART00000035409	3	1	OTTDART00000039226 ; Dr.78720 ; NM_199680.1	0	1	40711	NA	NA	NA	ENSDARG00000027915	324412	NA	NA	NA	NA	family with sequence similarity 164, member A	ZDB-GENE-030131-3132	zc2hc1a	3	1	1	2	3	3	31123	24	22595325	22611392
MAD_Dr_004_191147	ENSDART00000104717	0	-	-	0	1	90231	NA	NA	NA	ENSDARG00000040439	406266	NA	NA	NA	NA	ribosomal L24 domain containing 1	ZDB-GENE-040426-1925	rsl24d1	3	1	1	2	3	3	31123	25	446958	452320
MAD_Dr_004_192235	OTTDART00000027347	0	-	-	0	1	91695	NA	NA	NA	ENSDARG00000038196	550426	NA	NA	NA	NA	zgc:112146	ZDB-GENE-050417-237	zgc:112146	3	1	1	2	3	3	31123	NA	NA	NA
MAD_Dr_004_156618	OTTDART00000023180	0	-	-	0	1	34775	NA	NA	NA	ENSDARG00000060683	562066	NA	NA	NA	NA	NA	ZDB-GENE-060526-97	lrsam1	3	1	1	2	3	3	31123	5	32265012	32282445
MAD_Dr_004_147148	NM_213257.1 ; Dr.7614 ; ENSDART00000027214	1	1	OTTDART00000025053	0	1	20526	NM_213257.1	NM_213257	slc25a25	ENSDARG00000010572	406541	solute carrier family 25 (mitochondrial carrier; p	Dr.7614	slc25a25	solute carrier family 25 (mitochondrial carrier; p	solute carrier family 25 (mitochondrial carrier; p	ZDB-GENE-040426-2396	slc25a25a	3	1	1	2	2	3	31122	8	2547525	2557783
MAD_Dr_004_115273	OTTDART00000016367	0	-	-	0	1	11571	NA	NA	NA	ENSDARG00000043718	562515	NA	NA	NA	NA	NA	ZDB-GENE-060503-897	si:dkey-114g7.4	3	1	1	1	2	3	31112	NA	NA	NA
MAD_Dr_004_181018	NM_001017774.1 ; Dr.87089	0	1		0	1	71147	NM_001017774.1	NM_001017774	zgc:110373	ENSDARG00000018281	550471	zgc:110373	Dr.87089	zgc:110373	zgc:110373	zgc:110373	ZDB-GENE-050417-296	zgc:110373	3	1	1	1	2	3	31112	18	7131958	7138441
MAD_Dr_004_101469	OTTDART00000040518	1	0	Dr.135360	0	1	101556	NA	NA	NA	ENSDARG00000092014	-	NA	NA	NA	NA	NA	ZDB-GENE-090313-57	si:ch211-170i2.2	3	1	1	1	2	3	31112	13	40628690	40682546
MAD_Dr_004_147994	NM_001037699.1 ; Dr.89191	0	1		0	1	21776	NM_001037699.1	NM_001037699	golph3l	ENSDARG00000036943	569617	golgi phosphoprotein 3-like	Dr.89191	golph3l	golgi phosphoprotein 3-like	zgc:123347	ZDB-GENE-051113-168	golph3l	2	4	4	1	3	4	24413	19	329857	340140
MAD_Dr_004_155534	NM_200574.1 ; Dr.84822	1	1	Dr.151856	0	1	33303	NM_200574.1	NM_200574	zgc:65895	ENSDARG00000034086	393546	zgc:65895	Dr.84822	zgc:65895	zgc:65895	zgc:65895	ZDB-GENE-040426-1466	zgc:65895	2	4	4	1	3	4	24413	6	59762784	59767333
MAD_Dr_004_144694	NM_001077541.1 ; Dr.80864 ; ENSDART00000101671	1	1	OTTDART00000036362	0	1	17361	NM_001077541.1	NM_001077541	clgn	ENSDARG00000009315	556495	calmegin	Dr.80864	clgn	calmegin	calmegin	ZDB-GENE-060929-708	clgn	2	4	3	2	1	4	24321	1	39854684	39890319
MAD_Dr_004_167398	OTTDART00000018093	1	1	Dr.93226	0	1	50081	NA	NA	NA	ENSDARG00000092505	325401	NA	NA	NA	NA	NA	ZDB-GENE-030131-4126	si:dkeyp-80d11.1	2	4	3	2	1	4	24321	NA	NA	NA
MAD_Dr_004_142980	NM_001040361.1 ; Dr.39606	1	1	ENSDART00000088826	0	1	15087	NM_001040361.1	NM_001040361	h2afy	ENSDARG00000053442	678613	H2A histone family, member Y	Dr.39606	h2afy	H2A histone family, member Y	zgc:136891	ZDB-GENE-060421-4796	h2afy	2	4	3	1	1	4	24311	NA	NA	NA
MAD_Dr_004_100745	Dr.120039	1	1	XM_691701.2	0	1	100840	NA	NA	NA	ENSDARG00000074111	568375	NA	Dr.120039	NA	NA	similar to BCDIN3 domain containing	ZDB-GENE-050208-327	bcdin3d	2	4	1	3	2	4	24132	22	5712327	5714645
MAD_Dr_004_135624	OTTDART00000012169	9	0	NM_001102634.1 ; Dr.120188 ; ENSDART00000105276 ; ENSDART00000105297 ; ENSDART00000037286 ; OTTDART00000014178 ; OTTDART00000013896 ; NM_001105134.1 ; OTTDART00000014181	0	1	135229	NA	NA	NA	ENSDARG00000092702	-	NA	NA	NA	NA	NA	ZDB-GENE-050208-356	si:dkeyp-20e4.8	2	3	4	1	2	4	23412	22	25113280	25114006
MAD_Dr_004_138131	ENSDART00000099779	2	1	XM_695837.3 ; Dr.42351	0	1	13763	NA	NA	NA	ENSDARG00000077500	572154	NA	NA	NA	NA	NA	NA	NA	2	3	4	1	2	4	23412	NA	NA	NA
MAD_Dr_004_142157	OTTDART00000017839 ; ENSDART00000113640 ; ENSDART00000111649	9	0	OTTDART00000017841 ; XM_001344176.2 ; Dr.152412 ; XM_001922811.1 ; ENSDART00000110496 ; ENSDART00000111925 ; ENSDART00000114846 ; ENSDART00000110693 ; Dr.148504	0	1	141630	NA	NA	NA	ENSDARG00000087363	8388607	NA	NA	NA	NA	NA	NA	NA	2	3	4	1	2	4	23412	19	27977441	27980235
MAD_Dr_004_183609	OTTDART00000007265	2	1	ENSDART00000014528 ; NM_001045199.2	0	1	75671	NA	NA	NA	ENSDARG00000023546	570401	NA	NA	NA	NA	potassium intermediate/small conductance calcium-activated channel, subfamily N, member 1; novel protein similar to vertebrate potassium intermediate/small conductance calcium-activated channel, subfamily N	ZDB-GENE-060503-397	kcnn1b	2	3	4	1	2	4	23412	8	13206666	13277862
MAD_Dr_004_504325	OTTDART00000033638	5	0	gi|504325 ; gi|146610 ; gi|146074 ; gi|145340 ; gi|145007	1	1	-2	NA	NA	NA	ENSDARG00000029955	8388607	NA	NA	NA	NA	NA	ZDB-GENE-050309-196	glb1l	2	3	4	1	1	4	23411	9	12875907	12894797
MAD_Dr_004_177202	XM_001923613.1	0	-	-	0	1	64949	XM_001923613.1	XM_001923613	NA	ENSDARG00000089922	-	NA	NA	NA	NA	NA	NA	NA	2	3	3	3	1	3	23331	3	52699659	52725759
MAD_Dr_004_142373	ENSDART00000061153	3	1	Dr.79563 ; XM_685040.3 ; OTTDART00000021708	0	1	14313	NA	NA	NA	ENSDARG00000041724	100331833	NA	NA	NA	NA	GLI pathogenesis-related 2	ZDB-GENE-030131-4424	glipr2	2	3	3	2	1	3	23321	5	32427400	32439517
MAD_Dr_004_156718	OTTDART00000007860	3	0	ENSDART00000104317 ; Dr.47159 ; NM_001044766.2	0	1	34923	NA	NA	NA	ENSDARG00000043821	553082	NA	NA	NA	NA	Kruppel-like factor 7 (ubiquitous), like; similar to Kruppel-like factor 7 (ubiquitous), like	ZDB-GENE-041014-171	klf7b	2	3	3	2	1	3	23321	9	28530363	28588325
MAD_Dr_004_151148	NM_213425.1 ; Dr.75961	2	0	ENSDART00000115081 ; ENSDART00000111411	0	1	26031	NM_213425.1	NM_213425	agpat3	ENSDARG00000036549	406734	1-acylglycerol-3-phosphate O-acyltransferase 3	Dr.75961	agpat3	1-acylglycerol-3-phosphate O-acyltransferase 3	1-acylglycerol-3-phosphate O-acyltransferase 3	ZDB-GENE-040426-2765	agpat3	2	3	3	2	1	3	23321	1	46143474	46184261
MAD_Dr_004_159050	ENSDART00000053685	2	1	Dr.132454 ; OTTDART00000023902	0	1	38300	NA	NA	NA	ENSDARG00000036967	-	NA	NA	NA	NA	spermine oxidase	ZDB-GENE-031201-3	smox	2	3	3	2	1	3	23321	1	41147988	41164822
MAD_Dr_004_169966	OTTDART00000028021	0	-	-	0	1	54036	NA	NA	NA	ENSDARG00000058287	445079	NA	NA	NA	NA	NA	ZDB-GENE-040801-212	gpalpp1	2	3	3	2	1	3	23321	1	33952837	33961797
MAD_Dr_004_172145	NM_001007317.1 ; Dr.79749	1	1	OTTDART00000027776	0	1	57371	NM_001007317.1	NM_001007317	zgc:92177	ENSDARG00000053496	100000842	zgc:92177	Dr.79749	im:5159996	im:5159996	zgc:92177	ZDB-GENE-041114-189	gemin8	2	3	3	2	1	3	23321	1	28254436	28257495
MAD_Dr_004_176355	OTTDART00000027779	0	-	-	0	1	6367	NA	NA	NA	ENSDARG00000037099	393285	NA	NA	NA	NA	NA	ZDB-GENE-040426-975	zgc:56306	2	3	3	2	1	3	23321	1	28407609	28424462
MAD_Dr_004_104219	OTTDART00000017413	11	0	ENSDART00000031485 ; NM_001012491.1 ; Dr.76472 ; XM_001922385.1 ; XM_001919142.1 ; OTTDART00000014338 ; OTTDART00000039812 ; ENSDART00000106428 ; XM_001919079.1 ; OTTDART00000014336 ; XM_001919257.1	0	1	104337	NA	NA	NA	ENSDARG00000071833	-	NA	NA	NA	NA	NA	ZDB-GENE-060503-340	si:dkey-20i20.14	2	3	3	1	3	3	23313	22	2644239	2652516
MAD_Dr_004_154646	Dr.123845	0	-	-	0	1	31296	NA	NA	NA	ENSDARG00000069230	558115	NA	Dr.123845	zgc:153738	zgc:153738	zgc:153738	ZDB-GENE-061013-622	zgc:153738	2	3	3	1	2	3	23312	8	18414340	18425079
MAD_Dr_004_156355	OTTDART00000033410	0	-	-	0	1	34408	NA	NA	NA	ENSDARG00000060354	563729	NA	NA	NA	NA	NA	ZDB-GENE-070912-549	samd7	2	3	3	1	2	3	23312	2	37244554	37260080
MAD_Dr_004_176425	OTTDART00000035278 ; OTTDART00000028698	0	1		0	1	63780	NA	NA	NA	ENSDARG00000021209	541442	NA	NA	NA	NA	zgc:113115	ZDB-GENE-050320-147	kctd9a	2	3	3	1	2	3	23312	8	51600038	51612629
MAD_Dr_004_186611	OTTDART00000036838	3	1	OTTDART00000036837 ; Dr.115762 ; NM_198825.2	0	1	80189	NA	NA	NA	ENSDARG00000095007	386721	NA	NA	NA	NA	NA	ZDB-GENE-031114-2	fam60al	2	3	3	1	2	3	23312	7	28782089	28790495
MAD_Dr_004_173226	ENSDART00000087036	3	1	XM_001331280.1 ; Dr.15513 ; NM_001076599.1	0	1	59001	NA	NA	NA	ENSDARG00000061197	767659	NA	NA	NA	NA	hypothetical LOC791851; zgc:153947	ZDB-GENE-060929-288	armc7	2	3	3	1	2	3	23312	12	26400277	26403491
MAD_Dr_004_179988	OTTDART00000015729	0	-	-	0	1	69308	NA	NA	NA	ENSDARG00000056396	436787	NA	NA	NA	NA	NA	ZDB-GENE-040718-219	dusp22a	2	3	3	1	2	3	23312	18	30532976	30586434
MAD_Dr_004_181738	ENSDART00000113468	2	0	Dr.148772 ; XM_001343358.2	0	1	72654	NA	NA	NA	ENSDARG00000079534	100332466	NA	NA	NA	NA	zgc:173545	NA	NA	2	3	3	1	2	3	23312	11	18080258	18081968
MAD_Dr_004_122788	OTTDART00000025327	0	-	-	0	1	12326	NA	NA	NA	ENSDARG00000018329	140425	NA	NA	NA	NA	NA	ZDB-GENE-011128-8	gc2	2	3	3	1	1	3	23311	7	50994741	51019251
MAD_Dr_004_151601	OTTDART00000036295 ; ENSDART00000090380	2	1	Dr.16479 ; NM_001089448.1	0	1	26597	NA	NA	NA	ENSDARG00000062467	8388607	NA	NA	NA	NA	zgc:162946	ZDB-GENE-070410-116	stra6l	2	3	3	1	1	3	23311	1	11485522	11504143
MAD_Dr_004_163807	Dr.86244 ; XM_693628.2	2	1	ENSDART00000103626 ; OTTDART00000036143	0	1	44836	XM_693628.2	XM_693628	NA	ENSDARG00000002377	767710	NA	Dr.86244	smcr7	Smith-Magenis syndrome chromosome region, candidat	hypothetical LOC570181; Smith-Magenis syndrome chromosome region, candidate 7	ZDB-GENE-060929-864	mief2	2	3	3	1	1	3	23311	1	7837212	7847898
MAD_Dr_004_148215	NM_181766.2 ; Dr.76267	0	1		0	1	22060	NM_181766.2	NM_181766	anxa11b	ENSDARG00000002632	353365	annexin A11b	Dr.76267	anxa11b	annexin A11b	annexin A11b	ZDB-GENE-030707-5	anxa11b	2	3	3	1	1	3	23311	12	48819021	48883985
MAD_Dr_004_151082	OTTDART00000023898	0	-	-	0	1	25943	NA	NA	NA	ENSDARG00000008723	8388607	NA	NA	NA	NA	NA	ZDB-GENE-040426-1354	prkcba	2	3	3	1	1	3	23311	1	8320608	8380801
MAD_Dr_004_163575	XM_701845.2 ; Dr.79320	0	1		0	1	44517	XM_701845.2	XM_701845	NA	ENSDARG00000075413	556348	NA	Dr.79320	wu:fj35c01	wu:fj35c01	wu:fj35c01	ZDB-GENE-030131-7805	ctxn2	2	3	3	1	1	3	23311	NA	NA	NA
MAD_Dr_004_180242	ENSDART00000066987 ; ENSDART00000110921	2	1	Dr.111296 ; NM_001003618.1	0	1	69674	NA	NA	NA	ENSDARG00000093007	-	NA	NA	NA	NA	NA	ZDB-GENE-040801-137	mphosph6	2	3	3	1	1	3	23311	25	35447097	35451405
MAD_Dr_004_151726	NM_001110033.1 ; ENSDART00000067253	2	1	ENSDART00000102534 ; Dr.135121	0	1	26761	NM_001110033.1	NM_001110033	stab2	ENSDARG00000045748	565194	stabilin 2	NA	NA	NA	stabilin 2	ZDB-GENE-041210-336	stab2	2	3	2	2	1	3	23221	4	10722946	10764698
MAD_Dr_004_168952	XM_684990.3	0	-	-	0	1	52333	XM_684990.3	XM_684990	NA	ENSDARG00000075857	-	NA	NA	NA	NA	NA	NA	NA	2	3	2	2	1	3	23221	12	34097067	34157032
MAD_Dr_004_170195	OTTDART00000028099	0	-	-	0	1	54383	NA	NA	NA	ENSDARG00000041080	541481	NA	NA	NA	NA	hypothetical LOC792215; THAP domain containing, apoptosis associated protein 3	ZDB-GENE-050327-4	thap3	2	3	2	1	2	3	23212	23	30799185	30801065
MAD_Dr_004_184882	OTTDART00000027660	0	-	-	0	1	77593	NA	NA	NA	ENSDARG00000038095	445073	NA	NA	NA	NA	NA	ZDB-GENE-040801-205	socs1a	2	3	2	1	2	3	23212	3	26682187	26684082
MAD_Dr_004_108493	OTTDART00000023452	2	0	Dr.87290 ; NM_001002046.1	0	1	108757	NA	NA	NA	ENSDARG00000034885	415135	NA	NA	NA	NA	blocked early in transport 1 homolog (S. cerevisiae)	ZDB-GENE-040625-3	bet1	2	3	2	1	1	3	23211	19	41312790	41319041
MAD_Dr_004_183756	OTTDART00000020660	3	1	ENSDART00000019459 ; Dr.79637 ; NM_200441.1	0	1	7589	NA	NA	NA	ENSDARG00000003320	393413	NA	NA	NA	NA	family with sequence similarity 91, member A1	ZDB-GENE-040426-1187	fam91a1	2	3	2	1	1	3	23211	19	33506275	33550600
MAD_Dr_004_180714	NM_001079957.1 ; Dr.87274	1	1	ENSDART00000097671	0	1	70369	NM_001079957.1	NM_001079957	zgc:158432	ENSDARG00000067806	555281	zgc:158432	Dr.87274	zgc:158432	zgc:158432	zgc:158432	ZDB-GENE-061201-57	zgc:158432	2	3	1	3	3	3	23133	5	35938382	35948871
MAD_Dr_004_167282	OTTDART00000034264	5	1	ENSDART00000098641 ; ENSDART00000098639 ; ENSDART00000034225 ; Dr.21041 ; NM_199804.1	0	1	49926	NA	NA	NA	ENSDARG00000021584	327429	NA	NA	NA	NA	zgc:55318	ZDB-GENE-030131-5640	cntn5	2	3	1	3	2	3	23132	18	42151904	42607737
MAD_Dr_004_186343	ENSDART00000105866	0	-	-	0	1	79797	NA	NA	NA	ENSDARG00000058753	100329262	NA	NA	NA	NA	NA	ZDB-GENE-120727-11	unm_sa687	2	3	1	3	2	3	23132	22	6917463	6931294
MAD_Dr_004_110569	ENSDART00000053568	0	-	-	0	1	110858	NA	NA	NA	ENSDARG00000036895	58094	NA	NA	NA	NA	death associated protein 1b	ZDB-GENE-000511-4	dap1b	2	3	1	2	2	3	23122	9	52836301	52864179
MAD_Dr_004_166846	OTTDART00000028023	3	1	ENSDART00000056570 ; Dr.2818 ; NM_001004114.1	0	1	4930	NA	NA	NA	ENSDARG00000038737	445482	NA	NA	NA	NA	NA	ZDB-GENE-040822-33	phf20b	2	3	1	2	2	3	23122	23	15236719	15280742
MAD_Dr_004_503327	NM_001128668.1	4	0	gi|503327 ; gi|175400 ; gi|174115 ; gi|175267	1	1	-2	NM_001128668.1	NM_001128668	tmed3	ENSDARG00000028816	336391	transmembrane emp24 protein transport domain conta	NA	NA	NA	transmembrane emp24 protein transport domain containing 3	ZDB-GENE-030131-8335	tmed3	2	3	1	2	2	3	23122	7	29904516	29906541
MAD_Dr_004_178211	OTTDART00000038029	0	-	-	0	1	66552	NA	NA	NA	ENSDARG00000069957	8388607	NA	NA	NA	NA	NA	ZDB-GENE-030131-5253	zgc:162936	2	3	1	2	2	3	23122	15	965722	971012
MAD_Dr_004_180562	OTTDART00000042601 ; XM_684637.2	0	1		0	1	7014	XM_684637.2	XM_684637	NA	ENSDARG00000015003	-	NA	NA	NA	NA	NA	ZDB-GENE-090311-38	arhgap4b	2	3	1	2	2	3	23122	23	18688895	18761152
MAD_Dr_004_182609	ENSDART00000112758	1	1	OTTDART00000042372	0	1	74033	NA	NA	NA	ENSDARG00000077571	100142646	NA	NA	NA	NA	zgc:174862	ZDB-GENE-080303-29	zgc:174862	2	3	1	2	2	3	23122	23	43468921	43500479
MAD_Dr_004_185363	OTTDART00000027122	3	1	ENSDART00000014696 ; Dr.75810 ; NM_131443.2	0	1	78338	NA	NA	NA	ENSDARG00000002779	30721	NA	NA	NA	NA	pancreatic and duodenal homeobox 1	ZDB-GENE-990415-122	pdx1	2	3	1	2	2	3	23122	24	21539015	21541532
MAD_Dr_004_187568	Dr.45792	2	0	OTTDART00000028499 ; ENSDART00000114144	0	1	81510	NA	NA	NA	ENSDARG00000043487	791795	NA	Dr.45792	ptrh2	peptidyl-tRNA hydrolase 2	peptidyl-tRNA hydrolase 2	ZDB-GENE-050522-163	ptrh2	2	3	1	2	2	3	23122	NA	NA	NA
MAD_Dr_004_187951	OTTDART00000028499	2	0	ENSDART00000114144 ; Dr.45792	0	1	82225	NA	NA	NA	ENSDARG00000077339	791795	NA	NA	NA	NA	peptidyl-tRNA hydrolase 2	ZDB-GENE-050522-163	ptrh2	2	3	1	2	2	3	23122	10	28420124	28422692
MAD_Dr_004_165717	ENSDART00000099417	2	1	Dr.84072 ; XM_001338542.2	0	1	47679	NA	NA	NA	ENSDARG00000076082	798124	NA	NA	NA	NA	similar to THAP domain containing, apoptosis associated protein 2	NA	NA	2	3	1	2	2	3	23122	5	6393351	6397953
MAD_Dr_004_150131	NM_001077161.1 ; Dr.108194	3	1	ENSDART00000113529 ; ENSDART00000087329 ; OTTDART00000037006	0	1	24598	NM_001077161.1	NM_001077161	zfp438	ENSDARG00000061311	798757	zinc finger protein 438	Dr.108194	zfp438	zinc finger protein 438	zgc:152875	ZDB-GENE-060929-868	znf438	2	3	1	2	1	3	23121	12	26786021	26873638
MAD_Dr_004_182490	ENSDART00000065600	1	1	OTTDART00000038360	0	1	73878	NA	NA	NA	ENSDARG00000044642	447891	NA	NA	NA	NA	sterol-C5-desaturase (fungal ERG3, delta-5-desaturase) homolog (S. cerevisae)	ZDB-GENE-040912-56	sc5d	2	3	1	1	3	3	23113	21	24495074	24498905
MAD_Dr_004_110299	OTTDART00000034049	1	1	Dr.116492	0	1	110575	NA	NA	NA	ENSDARG00000055833	560034	NA	NA	NA	NA	novel protein containing lectin C-type domains	ZDB-GENE-070912-438	si:dkey-216e24.3	2	3	1	1	2	3	23112	9	33426098	33427503
MAD_Dr_004_168303	NM_001075115.1	0	-	-	0	1	51394	NM_001075115.1	NM_001075115	si:dkey-177p2.14	ENSDARG00000055426	566444	si:dkey-177p2.14	NA	NA	NA	si:dkey-177p2.14	ZDB-GENE-041001-119	rwdd2b	2	3	1	1	2	3	23112	20	27006068	27016826
MAD_Dr_004_171894	ENSDART00000058678	1	1	XM_692352.3	0	1	57038	NA	NA	NA	ENSDARG00000040119	751722	NA	NA	NA	NA	zgc:153691	ZDB-GENE-060825-61	ccdc127a	2	3	1	1	1	3	23111	NA	NA	NA
MAD_Dr_004_187230	XM_001922528.1 ; Dr.9683	0	1		0	1	81026	XM_001922528.1	XM_001922528	NA	ENSDARG00000076296	100147776	NA	Dr.9683	si:ch211-160k22.1	si:ch211-160k22.1	hypothetical LOC100147776; hypothetical protein LOC100149518	ZDB-GENE-070705-75	triqk	2	3	1	1	1	3	23111	19	33877568	33924576
MAD_Dr_004_147708	OTTDART00000029351	0	-	-	0	1	21361	NA	NA	NA	ENSDARG00000070231	678520	NA	NA	NA	NA	NA	ZDB-GENE-060421-4949	polh	2	2	3	2	1	3	22321	13	683288	694273
MAD_Dr_004_178191	ENSDART00000076528	1	1	OTTDART00000011128	0	1	66516	NA	NA	NA	ENSDARG00000054344	561215	NA	NA	NA	NA	si:dkey-77n11.3	ZDB-GENE-050208-136	gabpb2b	2	2	3	2	1	3	22321	16	38387751	38397524
MAD_Dr_004_184867	ENSDART00000080006	2	1	OTTDART00000036192 ; OTTDART00000036191	0	1	77562	NA	NA	NA	ENSDARG00000057365	554145	NA	NA	NA	NA	zgc:112263	ZDB-GENE-050522-453	zgc:112263	2	2	3	2	1	3	22321	8	18164621	18167630
MAD_Dr_004_122490	OTTDART00000040254	1	1	XM_001921144.1	0	1	122982	NA	NA	NA	ENSDARG00000067798	-	NA	NA	NA	NA	NA	ZDB-GENE-081107-53	ppapdc1a	2	2	3	2	1	3	22321	NA	NA	NA
MAD_Dr_004_175253	OTTDART00000039091	0	-	-	0	1	61975	NA	NA	NA	ENSDARG00000070675	393773	NA	NA	NA	NA	NA	ZDB-GENE-040426-1772	fam3a	2	2	3	1	3	3	22313	23	25209317	25223747
MAD_Dr_004_181296	OTTDART00000034364 ; OTTDART00000034362	1	1	OTTDART00000034363	0	1	71831	NA	NA	NA	ENSDARG00000009267	678627	NA	NA	NA	NA	NA	ZDB-GENE-060421-2858	zgc:136439	2	2	3	1	2	3	22312	9	41278242	41281394
MAD_Dr_004_128584	ENSDART00000015199	1	1	Dr.9060	0	1	128540	NA	NA	NA	ENSDARG00000013012	405888	NA	NA	NA	NA	ribosomal protein L36	ZDB-GENE-040622-2	rpl36	2	2	3	1	2	3	22312	NA	NA	NA
MAD_Dr_004_142079	ENSDART00000110496	6	0	ENSDART00000111925 ; ENSDART00000103909 ; ENSDART00000112989 ; Dr.135271 ; XM_001344176.2 ; Dr.94994	0	1	141557	NA	NA	NA	ENSDARG00000040574	449685	NA	NA	NA	NA	zgc:136410	ZDB-GENE-060421-6071	zgc:136410	2	2	3	1	2	3	22312	NA	NA	NA
MAD_Dr_004_150757	NM_213465.1	1	1	OTTDART00000025003	0	1	2551	NM_213465.1	NM_213465	sec23a	ENSDARG00000016636	406774	Sec23 homolog A (S. cerevisiae)	NA	NA	NA	Sec23 homolog A (S. cerevisiae)	ZDB-GENE-040426-2823	sec23a	2	2	3	1	2	3	22312	NA	NA	NA
MAD_Dr_004_154488	ENSDART00000059623	1	1	OTTDART00000028424	0	1	31043	NA	NA	NA	ENSDARG00000040698	492502	NA	NA	NA	NA	pleckstrin homology domain containing, family A (p	ZDB-GENE-041114-69	plekha8	2	2	3	1	2	3	22312	16	20459680	20488417
MAD_Dr_004_155893	NM_001007342.1 ; Dr.89368	1	0	ENSDART00000012287	0	1	33779	NM_001007342.1	NM_001007342	zgc:103506	ENSDARG00000003084	492470	zgc:103506	Dr.89368	zgc:103506	zgc:103506	zgc:103506	ZDB-GENE-041114-29	spire2	2	2	3	1	2	3	22312	25	34383041	34406648
MAD_Dr_004_195188	OTTDART00000023478	3	0	XM_001918982.1 ; OTTDART00000023486 ; OTTDART00000023417	0	1	95415	NA	NA	NA	ENSDARG00000092327	-	NA	NA	NA	NA	NA	ZDB-GENE-061009-51	si:dkeyp-2e4.7	2	2	3	1	2	3	22312	13	44698870	44699823
MAD_Dr_004_197285	OTTDART00000030363 ; OTTDART00000030362	0	1		0	1	97602	NA	NA	NA	ENSDARG00000063559	570443	NA	NA	NA	NA	NA	ZDB-GENE-070705-212	pigx	2	2	3	1	2	3	22312	22	2915074	2921263
MAD_Dr_004_155095	ENSDART00000105133	7	0	Dr.150410 ; XM_001918544.1 ; Dr.385 ; NM_001040387.1 ; OTTDART00000037359 ; Dr.153356 ; XM_001922768.1	0	1	31882	NA	NA	NA	ENSDARG00000071208	30123	NA	NA	NA	NA	similar to Protein Wnt-4a; hypothetical protein LOC100149095; hypothetical protein LOC100149093; wingless-type MMTV integration site family, member 4a	ZDB-GENE-980526-352	wnt4a	2	2	3	1	2	3	22312	11	38905892	38940961
MAD_Dr_004_100155	OTTDART00000028469	1	1	OTTDART00000028468	0	1	100197	NA	NA	NA	ENSDARG00000054914	436731	NA	NA	NA	NA	NA	ZDB-GENE-040718-158	dgat1b	2	2	3	1	1	3	22311	16	30990524	31042800
MAD_Dr_004_502367	ENSDART00000105944	4	0	gi|502367 ; gi|153047 ; gi|153039 ; gi|106416	1	1	-2	NA	NA	NA	ENSDARG00000071589	-	NA	NA	NA	NA	si:dkey-253d23.2	NA	NA	2	2	3	1	1	3	22311	22	9801947	9838713
MAD_Dr_004_119352	ENSDART00000109978	2	1	Dr.91815 ; XM_682645.3	0	1	11977	NA	NA	NA	ENSDARG00000075165	559312	NA	NA	NA	NA	NA	ZDB-GENE-120727-18	unm_hu7905	2	2	2	3	1	3	22231	13	47543660	47548321
MAD_Dr_004_160698	NM_001003746.1	0	-	-	0	1	40538	NM_001003746.1	NM_001003746	acat1	ENSDARG00000045888	445290	acetyl-Coenzyme A acetyltransferase 1 (acetoacetyl	NA	NA	NA	acetyl-Coenzyme A acetyltransferase 1 (acetoacetyl Coenzyme A thiolase); similar to acetyl-Coenzyme A acetyltransferase 1 (acetoacetyl Coenzyme A thiolase)	ZDB-GENE-040808-68	acat1	2	2	2	3	1	3	22231	10	38720561	38752666
MAD_Dr_004_174257	ENSDART00000100277	2	1	Dr.118729 ; NM_001114588.1	0	1	60503	NA	NA	NA	ENSDARG00000075525	100136870	NA	NA	NA	NA	similar to Protein CLN8; zgc:172202	ZDB-GENE-060906-3	cln8	2	2	2	3	1	3	22231	17	25163616	25176480
MAD_Dr_004_173393	OTTDART00000023486	0	-	-	0	1	59243	NA	NA	NA	ENSDARG00000095283	8388607	NA	NA	NA	NA	NA	ZDB-GENE-061009-48	si:dkeyp-2e4.3	2	2	2	3	1	3	22231	13	44703792	44706915
MAD_Dr_004_176911	NM_001017769.1 ; Dr.75880	2	0	ENSDART00000024750 ; OTTDART00000029188	0	1	64512	NM_001017769.1	NM_001017769	hmgb3b	ENSDARG00000006408	550466	high-mobility group box 3b	Dr.75880	hmgb3b	high-mobility group box 3b	high-mobility group box 3b	ZDB-GENE-050417-290	hmgb3b	2	2	2	3	1	3	22231	21	34085269	34095286
MAD_Dr_004_186501	ENSDART00000038228	0	-	-	0	1	80024	NA	NA	NA	ENSDARG00000027966	447897	NA	NA	NA	NA	adaptor-related protein complex 1, sigma 3 subunit	ZDB-GENE-040912-62	ap1s3b	2	2	2	3	1	3	22231	2	47733074	47766642
MAD_Dr_004_190318	XM_001923036.1	1	1	XM_686224.2	0	1	89083	XM_001923036.1	XM_001923036	NA	ENSDARG00000003307	-	NA	NA	NA	NA	NA	NA	NA	2	2	2	2	1	2	22221	6	49724306	49742097
MAD_Dr_004_141234	ENSDART00000055238 ; ENSDART00000111607	0	1		0	1	140772	NA	NA	NA	ENSDARG00000037897	-	NA	NA	NA	NA	NA	ZDB-GENE-041121-5	glyr1	2	2	2	2	1	2	22221	NA	NA	NA
MAD_Dr_004_102233	OTTDART00000029159 ; OTTDART00000029158	0	1		0	1	102371	NA	NA	NA	ENSDARG00000044636	436971	NA	NA	NA	NA	NA	ZDB-GENE-040718-451	tomm20b	2	2	2	2	1	2	22221	NA	NA	NA
MAD_Dr_004_102330	ENSDART00000064112	2	0	Dr.154467 ; Dr.75137	0	1	102464	NA	NA	NA	ENSDARG00000043665	406294	NA	NA	NA	NA	glutaredoxin 5 homolog (S. cerevisiae)	ZDB-GENE-040426-1957	glrx5	2	2	2	2	1	2	22221	20	10496775	10500711
MAD_Dr_004_152103	OTTDART00000038229	5	1	ENSDART00000109533 ; ENSDART00000099856 ; Dr.81339 ; NM_001077721.1 ; OTTDART00000038228	0	1	27304	NA	NA	NA	ENSDARG00000068926	777613	NA	NA	NA	NA	si:ch211-137a8.2	ZDB-GENE-061103-172	si:ch211-137a8.2	2	2	2	2	1	2	22221	15	29092019	29138994
MAD_Dr_004_167852	ENSDART00000103934	3	1	Dr.26556 ; NM_212590.1 ; OTTDART00000028086	0	1	50735	NA	NA	NA	ENSDARG00000070644	321577	NA	NA	NA	NA	tocopherol (alpha) transfer protein-like	ZDB-GENE-030131-296	ttpal	2	2	2	2	1	2	22221	23	25942096	25948336
MAD_Dr_004_104030	OTTDART00000030076 ; ENSDART00000108870	2	1	Dr.82461 ; XM_690528.3	0	1	104152	NA	NA	NA	ENSDARG00000092464	-	NA	NA	NA	NA	NA	NA	NA	2	2	2	2	1	2	22221	5	22953301	22981515
MAD_Dr_004_105079	OTTDART00000045161	5	0	OTTDART00000045156 ; ENSDART00000064028 ; OTTDART00000045160 ; Dr.88445 ; NM_001080686.1	0	1	105227	NA	NA	NA	ENSDARG00000043604	791204	NA	NA	NA	NA	zgc:158860	ZDB-GENE-070112-1692	tmem205	2	2	2	2	1	2	22221	NA	NA	NA
MAD_Dr_004_105642	Dr.10904	2	1	OTTDART00000012558 ; OTTDART00000012557	0	1	10582	NA	NA	NA	ENSDARG00000040874	556762	NA	Dr.10904	wu:fb30h05	wu:fb30h05	adducin 3 (gamma) a	ZDB-GENE-030131-2721	add3a	2	2	2	2	1	2	22221	22	30098050	30321274
MAD_Dr_004_168646	OTTDART00000041162	0	-	-	0	1	51884	NA	NA	NA	ENSDARG00000060383	564760	NA	NA	NA	NA	NA	ZDB-GENE-070928-15	mmaa	2	2	2	2	1	2	22221	1	35224408	35238232
MAD_Dr_004_109827	OTTDART00000044911	1	0	OTTDART00000044910	0	1	110090	NA	NA	NA	ENSDARG00000074765	378479	NA	NA	NA	NA	hypothetical LOC571647; major histocompatibility complex class I ZE gene; similar to MHC class I antigen	NA	NA	2	2	2	2	1	2	22221	3	615199	634091
MAD_Dr_004_148735	NM_001020625.1 ; Dr.75383 ; OTTDART00000028980 ; ENSDART00000022279	0	1		0	1	22786	NM_001020625.1	NM_001020625	zgc:110687	ENSDARG00000013719	553652	zgc:110687	Dr.75383	zgc:110687	zgc:110687	zgc:110687	ZDB-GENE-050522-493	gtse1	2	2	2	2	1	2	22221	25	19496346	19510447
MAD_Dr_004_113806	OTTDART00000029219	0	-	-	0	1	11423	NA	NA	NA	ENSDARG00000059301	541479	NA	NA	NA	NA	NA	ZDB-GENE-051108-1	hmgcrb	2	2	2	2	1	2	22221	NA	NA	NA
MAD_Dr_004_115798	ENSDART00000109768	0	-	-	0	1	116221	NA	NA	NA	ENSDARG00000079061	100331220	NA	NA	NA	NA	NA	NA	NA	2	2	2	2	1	2	22221	NA	NA	NA
MAD_Dr_004_119307	OTTDART00000045061	2	1	ENSDART00000047993 ; NM_200073.1	0	1	11973	NA	NA	NA	ENSDARG00000037574	337670	NA	NA	NA	NA	ribosomal protein S6 kinase, like	ZDB-GENE-140106-28	zmp:0000001068	2	2	2	2	1	2	22221	14	8634312	8696391
MAD_Dr_004_170377	NM_001109727.1 ; Dr.90199 ; ENSDART00000105212	0	1		0	1	54624	NM_001109727.1	NM_001109727	si:dkey-263h23.4	ENSDARG00000071250	796128	si:dkey-263h23.4	Dr.90199	si:dkey-263h23.4	si:dkey-263h23.4	si:dkey-263h23.4	ZDB-GENE-060503-538	tmem79a	2	2	2	2	1	2	22221	19	791729	797027
MAD_Dr_004_126744	OTTDART00000026127	4	1	ENSDART00000042049 ; OTTDART00000026126 ; Dr.13371 ; NM_201496.1	0	1	126823	NA	NA	NA	ENSDARG00000031915	373126	NA	NA	NA	NA	hypoxia-inducible factor 1, alpha subunit inhibitor	ZDB-GENE-030826-19	hif1an	2	2	2	2	1	2	22221	13	29822183	29849765
MAD_Dr_004_162050	OTTDART00000005546	0	-	-	0	1	42434	NA	NA	NA	ENSDARG00000070434	8388607	NA	NA	NA	NA	NA	ZDB-GENE-031002-10	rhov	2	2	2	2	1	2	22221	20	28465652	28469047
MAD_Dr_004_131757	OTTDART00000009594	0	-	-	0	1	13142	NA	NA	NA	ENSDARG00000045525	556763	NA	NA	NA	NA	transmembrane and coiled-coil domain family 3	ZDB-GENE-030131-1811	tmcc3	2	2	2	2	1	2	22221	4	25765527	25823131
MAD_Dr_004_144625	OTTDART00000026500	1	1	ENSDART00000020048	0	1	17263	NA	NA	NA	ENSDARG00000011459	321099	NA	NA	NA	NA	NA	ZDB-GENE-030131-9653	gsna	2	2	2	2	1	2	22221	21	17535785	17566546
MAD_Dr_004_157136	ENSDART00000103361	2	1	ENSDART00000028620 ; OTTDART00000024948	0	1	35497	NA	NA	NA	ENSDARG00000025868	333946	NA	NA	NA	NA	zinc finger, DHHC-type containing 13	ZDB-GENE-041212-79	zdhhc13	2	2	2	2	1	2	22221	NA	NA	NA
MAD_Dr_004_180546	NM_001126450.1	4	1	ENSDART00000032825 ; OTTDART00000035619 ; NM_001077743.1 ; Dr.76880	0	1	70108	NM_001126450.1	NM_001126450	sept7b	ENSDARG00000019649	792259	septin 7b	NA	NA	NA	septin 7b	ZDB-GENE-061103-265	sept7b	2	2	2	2	1	2	22221	NA	NA	NA
MAD_Dr_004_146190	NM_201582.1 ; Dr.6574	2	0	ENSDART00000013066 ; OTTDART00000024408	0	1	19235	NM_201582.1	NM_201582	ercc3	ENSDARG00000002402	324323	excision repair cross-complementing rodent repair	Dr.6574	ercc3	excision repair cross-complementing rodent repair	excision repair cross-complementing rodent repair deficiency, complementation group 3	ZDB-GENE-030131-3043	ercc3	2	2	2	2	1	2	22221	6	9359875	9394542
MAD_Dr_004_148732	ENSDART00000081915	0	-	-	0	1	22782	NA	NA	NA	ENSDARG00000058943	541520	NA	NA	NA	NA	zgc:113071	ZDB-GENE-050327-55	cdcp1a	2	2	2	2	1	2	22221	16	2609899	2632856
MAD_Dr_004_149311	ENSDART00000013581	0	-	-	0	1	23532	NA	NA	NA	ENSDARG00000015153	402898	NA	NA	NA	NA	HSPC049 protein-like	ZDB-GENE-050113-2	wdr91	2	2	2	2	1	2	22221	21	1560555	1585176
MAD_Dr_004_150588	OTTDART00000027771 ; NM_207062.1 ; Dr.76277 ; ENSDART00000012873	0	1		0	1	25251	NM_207062.1	NM_207062	klf12a	ENSDARG00000015312	798629	Kruppel-like factor 12a	Dr.76277	klf12a	Kruppel-like factor 12a	Kruppel-like factor 12a	ZDB-GENE-030131-9188	klf12a	2	2	2	2	1	2	22221	1	33764287	33824155
MAD_Dr_004_150640	NM_131240.1 ; Dr.75104	2	1	ENSDART00000020967 ; OTTDART00000025335	0	1	25332	NM_131240.1	NM_131240	ck2a2a	ENSDARG00000012818	30488	casein kinase 2 alpha 2a	Dr.75104	ck2a2a	casein kinase 2 alpha 2a	casein kinase 2 alpha 2a	ZDB-GENE-990415-28	csnk2a2a	2	2	2	2	1	2	22221	7	56450335	56465562
MAD_Dr_004_151870	NM_213235.1 ; Dr.3014 ; ENSDART00000103471 ; ENSDART00000112942	1	1	OTTDART00000018322	0	1	26954	NM_213235.1	NM_213235	khdrbs1b	ENSDARG00000070475	406516	KH domain containing, RNA binding, signal transduc	Dr.3014	khdrbs1b	KH domain containing, RNA binding, signal transduc	KH domain containing, RNA binding, signal transduc	ZDB-GENE-040426-2344	khdrbs1b	2	2	2	2	1	2	22221	19	30761363	30771746
MAD_Dr_004_152211	OTTDART00000045055	0	-	-	0	1	27469	NA	NA	NA	ENSDARG00000058494	335894	NA	NA	NA	NA	NA	ZDB-GENE-030131-7837	dnaja3a	2	2	2	2	1	2	22221	3	11985830	12007472
MAD_Dr_004_152433	NM_001128699.1 ; Dr.52204	2	0	ENSDART00000024984 ; OTTDART00000041348	0	1	27763	NM_001128699.1	NM_001128699	papss1	ENSDARG00000057099	559488	3`-phosphoadenosine 5`-phosphosulfate synthase 1	Dr.52204	papss1	3`-phosphoadenosine 5`-phosphosulfate synthase 1	zgc:194985	ZDB-GENE-080721-5	papss1	2	2	2	2	1	2	22221	1	49843760	49884138
MAD_Dr_004_152651	ENSDART00000066948 ; OTTDART00000009593	0	1		0	1	28068	NA	NA	NA	ENSDARG00000045527	553649	NA	NA	NA	NA	NA	ZDB-GENE-041210-198	nr2c1	2	2	2	2	1	2	22221	4	25840714	25869810
MAD_Dr_004_153930	ENSDART00000090631	2	1	Dr.112365 ; NM_001123049.1	0	1	30292	NA	NA	NA	ENSDARG00000062561	100144553	NA	NA	NA	NA	aarF domain containing kinase 1	ZDB-GENE-080401-5	adck1	2	2	2	2	1	2	22221	17	17472359	17739384
MAD_Dr_004_153167	NM_213221.1 ; Dr.36703	0	1		0	1	28852	NM_213221.1	NM_213221	ccni	ENSDARG00000068214	406239	cyclin I	Dr.36703	ccni	cyclin I	cyclin I	ZDB-GENE-040426-2898	ccni	2	2	2	2	1	2	22221	21	5673971	5692282
MAD_Dr_004_153841	XM_692941.3	0	-	-	0	1	30129	XM_692941.3	XM_692941	NA	ENSDARG00000054302	569546	NA	NA	NA	NA	im:7147183	ZDB-GENE-060810-22	im:7147183	2	2	2	2	1	2	22221	17	29177314	29196747
MAD_Dr_004_154056	NM_131674.1	1	1	Dr.81424	0	1	30454	NM_131674.1	NM_131674	arnt2	ENSDARG00000058449	64277	aryl hydrocarbon receptor nuclear translocator 2	NA	NA	NA	aryl hydrocarbon receptor nuclear translocator 2	ZDB-GENE-001207-3	arnt2	2	2	2	2	1	2	22221	NA	NA	NA
MAD_Dr_004_156979	NM_212776.1 ; Dr.80305	1	1	ENSDART00000011928	0	1	35302	NM_212776.1	NM_212776	tmem30a	ENSDARG00000030236	337397	transmembrane protein 30A	Dr.80305	tmem30a	transmembrane protein 30A	transmembrane protein 30A	ZDB-GENE-040704-26	tmem30aa	2	2	2	2	1	2	22221	17	49898254	49910216
MAD_Dr_004_157724	NM_200204.1 ; Dr.78093	0	1		0	1	36339	NM_200204.1	NM_200204	zgc:56178	ENSDARG00000025882	393173	zgc:56178	Dr.78093	zgc:56178	zgc:56178	zgc:56178	ZDB-GENE-040426-928	rpap3	2	2	2	2	1	2	22221	NA	NA	NA
MAD_Dr_004_161727	Dr.82787	2	0	ENSDART00000018123 ; ENSDART00000115090	0	1	41939	NA	NA	NA	ENSDARG00000012199	799963	NA	Dr.82787	gpt2	glutamic pyruvate transaminase (alanine aminotrans	glutamic pyruvate transaminase (alanine aminotransferase) 2	ZDB-GENE-030729-8	gpt2	2	2	2	2	1	2	22221	7	41607356	41619953
MAD_Dr_004_158254	ENSDART00000020234	0	-	-	0	1	37134	NA	NA	NA	ENSDARG00000015770	406584	NA	NA	NA	NA	zgc:85800	ZDB-GENE-040426-2491	fam175b	2	2	2	2	1	2	22221	NA	NA	NA
MAD_Dr_004_159105	ENSDART00000105736	1	0	NM_001076605.1	0	1	38379	NA	NA	NA	ENSDARG00000071487	767666	NA	NA	NA	NA	zgc:152948	ZDB-GENE-060929-364	zgc:152948	2	2	2	2	1	2	22221	21	1603862	1618590
MAD_Dr_004_159106	NM_001024389.1 ; Dr.106257	1	1	ENSDART00000033980	0	1	38380	NM_001024389.1	NM_001024389	lims1	ENSDARG00000026985	554019	LIM and senescent cell antigen-like domains 1	Dr.106257	lims1	LIM and senescent cell antigen-like domains 1	LIM and senescent cell antigen-like domains 1	ZDB-GENE-050522-236	lims1	2	2	2	2	1	2	22221	11	33335812	33355810
MAD_Dr_004_501985	ENSDART00000092270	2	1	gi|501985 ; gi|161282	1	1	-2	NA	NA	NA	ENSDARG00000063254	791165	NA	NA	NA	NA	zgc:158644	ZDB-GENE-070112-1352	r3hdm4	2	2	2	2	1	2	22221	11	5724366	5735042
MAD_Dr_004_161964	ENSDART00000093009	1	0	XM_001922410.1	0	1	42285	NA	NA	NA	ENSDARG00000014439	-	NA	NA	NA	NA	NA	ZDB-GENE-111104-3	dgkza	2	2	2	2	1	2	22221	7	38740129	38884365
MAD_Dr_004_162163	ENSDART00000087624	1	1	OTTDART00000028492	0	1	42610	NA	NA	NA	ENSDARG00000055837	557983	NA	NA	NA	NA	zgc:136551	ZDB-GENE-060616-136	arhgef1b	2	2	2	2	1	2	22221	16	26267453	26358969
MAD_Dr_004_163283	ENSDART00000067434	2	0	Dr.134107 ; NM_001004648.1	0	1	44112	NA	NA	NA	ENSDARG00000045878	447910	NA	NA	NA	NA	zgc:101062	ZDB-GENE-040912-79	nudt4b	2	2	2	2	1	2	22221	4	1939435	1952306
MAD_Dr_004_163881	ENSDART00000090338 ; ENSDART00000026569	1	1	OTTDART00000037891	0	1	44940	NA	NA	NA	ENSDARG00000091739	118437	NA	NA	NA	NA	NA	ZDB-GENE-071004-15	zgc:171629	2	2	2	2	1	2	22221	NA	NA	NA
MAD_Dr_004_167119	ENSDART00000075588	1	1	XM_693494.3	0	1	49673	NA	NA	NA	ENSDARG00000053554	570063	NA	NA	NA	NA	NA	ZDB-GENE-030131-4513	wdr76	2	2	2	2	1	2	22221	7	29930461	29938640
MAD_Dr_004_167206	NM_001007404.2 ; Dr.78866	2	1	ENSDART00000047020 ; OTTDART00000028081	0	1	49817	NM_001007404.2	NM_001007404	casp9	ENSDARG00000004325	492763	caspase 9, apoptosis-related cysteine protease	Dr.78866	casp9	caspase 9, apoptosis-related cysteine protease	caspase 9, apoptosis-related cysteine protease	ZDB-GENE-030825-5	casp9	2	2	2	2	1	2	22221	23	25047232	25058731
MAD_Dr_004_168855	NM_001100401.1 ; Dr.83237	2	0	ENSDART00000010193 ; OTTDART00000038574	0	1	52194	NM_001100401.1	NM_001100401	hbegf	ENSDARG00000031246	407664	heparin-binding EGF-like growth factor	Dr.83237	hbegf	heparin-binding EGF-like growth factor	heparin-binding EGF-like growth factor	ZDB-GENE-070820-6	hbegfb	2	2	2	2	1	2	22221	21	30124600	30132252
MAD_Dr_004_170951	ENSDART00000053438 ; ENSDART00000066173	4	0	ENSDART00000104845 ; NM_130974.1 ; Dr.124123 ; OTTDART00000001828	0	1	55436	NA	NA	NA	ENSDARG00000079402	30163	NA	NA	NA	NA	tapasin; similar to tapasin; si:ch211-51f10.1	ZDB-GENE-010110-2	tapbp	2	2	2	2	1	2	22221	19	7119769	7143239
MAD_Dr_004_177026	OTTDART00000029302	3	1	ENSDART00000080686 ; Dr.86010 ; NM_001003568.1	0	1	64693	NA	NA	NA	ENSDARG00000057928	445174	NA	NA	NA	NA	zgc:101080	ZDB-GENE-040801-87	mzt2b	2	2	2	2	1	2	22221	21	15983151	15991903
MAD_Dr_004_177521	ENSDART00000063245	1	1	XR_045093.1	0	1	65420	NA	NA	NA	ENSDARG00000043077	-	NA	NA	NA	NA	si:ch211-103f16.1	ZDB-GENE-050208-570	nisch	2	2	2	2	1	2	22221	22	10331488	10367998
MAD_Dr_004_184198	ENSDART00000008287	2	1	Dr.945 ; OTTDART00000026161	0	1	76548	NA	NA	NA	ENSDARG00000005423	323107	NA	NA	NA	NA	phosphoglycerate mutase 1a	ZDB-GENE-030131-1827	pgam1a	2	2	2	2	1	2	22221	13	31262742	31267537
MAD_Dr_004_183062	OTTDART00000032954	1	1	OTTDART00000032953	0	1	74754	NA	NA	NA	ENSDARG00000035819	558775	NA	NA	NA	NA	NA	ZDB-GENE-070112-1762	sirt3	2	2	2	2	1	2	22221	7	57182973	57207031
MAD_Dr_004_183336	ENSDART00000082934	2	1	Dr.115914 ; NM_001105693.1	0	1	75232	NA	NA	NA	ENSDARG00000059572	100126013	NA	NA	NA	NA	zgc:171682	ZDB-GENE-070928-19	zgc:171682	2	2	2	2	1	2	22221	NA	NA	NA
MAD_Dr_004_185466	NM_001083548.1 ; Dr.5351	2	1	ENSDART00000004041 ; OTTDART00000035899	0	1	7850	NM_001083548.1	NM_001083548	zgc:162200	ENSDARG00000079934	558638	zgc:162200	Dr.5351	zgc:162200	zgc:162200	zgc:162200	ZDB-GENE-030131-2989	zgc:162200	2	2	2	2	1	2	22221	8	37027317	37072792
MAD_Dr_004_186953	Dr.16863 ; OTTDART00000027406	0	1		0	1	80672	NA	NA	NA	ENSDARG00000057910	795846	NA	Dr.16863	mrps34	mitochondrial ribosomal protein S34	mitochondrial ribosomal protein S34	ZDB-GENE-041114-71	mrps34	2	2	2	2	1	2	22221	3	15853322	15861168
MAD_Dr_004_190772	ENSDART00000084675	0	-	-	0	1	8968	NA	NA	NA	ENSDARG00000060249	569045	NA	NA	NA	NA	si:ch211-1c14.1	NA	NA	2	2	2	2	1	2	22221	5	36716512	36740930
MAD_Dr_004_501207	ENSDART00000034840	3	1	gi|501207 ; gi|152953 ; gi|152945	1	1	-2	NA	NA	NA	ENSDARG00000026634	-	NA	NA	NA	NA	NA	NA	NA	2	2	2	2	1	2	22221	21	14547518	14595390
MAD_Dr_004_502159	ENSDART00000100638	5	1	gi|502159 ; gi|151815 ; gi|148000 ; gi|144364 ; gi|144361	1	1	-2	NA	NA	NA	ENSDARG00000069253	100330674	NA	NA	NA	NA	NA	NA	NA	2	2	2	2	1	2	22221	NA	NA	NA
MAD_Dr_004_155058	ENSDART00000046059	2	1	Dr.120489 ; XM_001919707.1	0	1	3183	NA	NA	NA	ENSDARG00000077428	-	NA	NA	NA	NA	NA	NA	NA	2	2	2	2	1	2	22221	23	30134833	30504802
MAD_Dr_004_166713	ENSDART00000013582	0	-	-	0	1	49104	NA	NA	NA	ENSDARG00000086985	-	NA	NA	NA	NA	NA	NA	NA	2	2	2	2	1	2	22221	22	38498161	38530654
MAD_Dr_004_170912	ENSDART00000020358	4	0	ENSDART00000063587 ; OTTDART00000013729 ; Dr.88733 ; NM_001006662.1	0	1	55388	NA	NA	NA	ENSDARG00000057433	-	NA	NA	NA	NA	ST6 (alpha-N-acetyl-neuraminyl-2,3-beta-galactosyl	ZDB-GENE-040912-25	st6galnac5b	2	2	2	2	1	2	22221	8	17764668	17786547
MAD_Dr_004_186503	ENSDART00000055932	2	1	Dr.85322 ; NM_001002565.1	0	1	80026	NA	NA	NA	ENSDARG00000038348	436838	NA	NA	NA	NA	zgc:92758	ZDB-GENE-040718-303	pigh	2	2	2	2	1	2	22221	20	28500620	28505377
MAD_Dr_004_186517	OTTDART00000031860	3	0	Dr.126074 ; Dr.128958 ; OTTDART00000031965	0	1	80052	NA	NA	NA	ENSDARG00000093335	-	NA	NA	NA	NA	NA	ZDB-GENE-070705-46	si:ch211-153l6.3	2	2	2	2	1	2	22221	NA	NA	NA
MAD_Dr_004_190769	ENSDART00000074490	2	1	Dr.28719 ; XM_001333480.2	0	1	89673	NA	NA	NA	ENSDARG00000004447	-	NA	NA	NA	NA	NA	NA	NA	2	2	2	2	1	2	22221	7	38414494	38418304
MAD_Dr_004_145267	ENSDART00000061232	1	1	OTTDART00000041752	0	1	18091	NA	NA	NA	ENSDARG00000041776	-	NA	NA	NA	NA	NA	ZDB-GENE-090312-199	ndst3	2	2	2	2	1	2	22221	1	19453643	19580290
MAD_Dr_004_174187	ENSDART00000073684	1	1	XM_001924007.1	0	1	60401	NA	NA	NA	ENSDARG00000051962	-	NA	NA	NA	NA	NA	ZDB-GENE-070817-4	mmp15a	2	2	2	2	1	2	22221	25	17462999	17483301
MAD_Dr_004_144630	XM_001335980.1 ; Dr.118904	0	1		0	1	1727	XM_001335980.1	XM_001335980	NA	ENSDARG00000061294	795752	NA	Dr.118904	arhgap5	Rho GTPase activating protein 5	similar to Rho GTPase activating protein 5	ZDB-GENE-081014-1	arhgap5	2	2	2	2	1	2	22221	17	31722455	31780411
MAD_Dr_004_151375	OTTDART00000013683	1	1	XM_685744.3	0	1	26316	NA	NA	NA	ENSDARG00000062449	8388607	NA	NA	NA	NA	NA	ZDB-GENE-060503-362	xpr1	2	2	2	2	1	2	22221	8	14206771	14338185
MAD_Dr_004_188542	Dr.110948	1	0	ENSDART00000109915	0	1	83259	NA	NA	NA	ENSDARG00000074241	798975	NA	Dr.110948	tas2r202	taste receptor, type 2, member 202	taste receptor, type 2, member 202	NA	NA	2	2	2	2	1	2	22221	NA	NA	NA
MAD_Dr_004_195187	ENSDART00000012391	1	1	OTTDART00000028736	0	1	95413	NA	NA	NA	ENSDARG00000019990	449789	NA	NA	NA	NA	calcium binding protein 1	ZDB-GENE-041010-36	cabp1a	2	2	2	2	1	2	22221	8	39856412	39870029
MAD_Dr_004_504108	OTTDART00000028890	4	0	gi|504108 ; gi|149233 ; gi|149225 ; gi|148685	1	1	-2	NA	NA	NA	ENSDARG00000086998	393330	NA	NA	NA	NA	zgc:64002	ZDB-GENE-040426-1329	zgc:64002	2	2	2	2	1	2	22221	11	11991087	11996233
MAD_Dr_004_185317	OTTDART00000040798	1	1	Dr.117582	0	1	78251	NA	NA	NA	ENSDARG00000092483	799312	NA	NA	NA	NA	similar to IQ motif containing C	ZDB-GENE-090313-325	iqcc	2	2	2	1	3	3	22213	13	33167888	33171536
MAD_Dr_004_158070	NM_001020649.1	1	0	OTTDART00000027702	0	1	36868	NM_001020649.1	NM_001020649	mgat3	ENSDARG00000038069	553676	mannosyl (beta-1,4-)-glycoprotein beta-1,4-N-acety	NA	NA	NA	mannosyl (beta-1,4-)-glycoprotein beta-1,4-N-acetylglucosaminyltransferase	ZDB-GENE-050522-249	mgat3a	2	2	2	1	3	3	22213	3	25106851	25138203
MAD_Dr_004_164433	ENSDART00000082324	0	-	-	0	1	45725	NA	NA	NA	ENSDARG00000059252	334011	NA	NA	NA	NA	zona pellucida protein C	ZDB-GENE-040824-1	zpcx	2	2	2	1	3	3	22213	17	25309960	25313056
MAD_Dr_004_176321	NM_001114722.1	3	0	XM_001922757.1 ; ENSDART00000111624 ; NM_001114478.1	0	1	63622	NM_001114722.1	NM_001114722	zgc:175135	ENSDARG00000077741	100137125	zgc:175135	NA	NA	NA	hypothetical protein LOC100150308; hypothetical LOC797565; zgc:175135	ZDB-GENE-130530-829	zmp:0000000826	2	2	2	1	3	3	22213	11	17903118	17920496
MAD_Dr_004_183876	NM_200684.1	3	0	NM_001033739.1 ; OTTDART00000038237 ; ENSDART00000099694	0	1	76047	NM_200684.1	NM_200684	zgc:66024	ENSDARG00000068840	393657	zgc:66024	NA	NA	NA	zgc:66024; zgc:113969	ZDB-GENE-040426-1511	zgc:66024	2	2	2	1	3	3	22213	15	35076599	35086098
MAD_Dr_004_100308	ENSDART00000112343	5	0	Dr.20641 ; ENSDART00000114211 ; ENSDART00000056072 ; OTTDART00000037184 ; NM_001003835.1	0	1	10036	NA	NA	NA	ENSDARG00000078045	-	NA	NA	NA	NA	NA	NA	NA	2	2	2	1	2	2	22212	NA	NA	NA
MAD_Dr_004_101844	OTTDART00000033082	4	1	XM_001923314.1 ; OTTDART00000033083 ; ENSDART00000098463 ; OTTDART00000033080	0	1	101963	NA	NA	NA	ENSDARG00000060350	8388607	NA	NA	NA	NA	NA	NA	NA	2	2	2	1	2	2	22212	2	37225004	37233532
MAD_Dr_004_195504	Dr.76713	1	0	OTTDART00000002322	0	1	95768	NA	NA	NA	ENSDARG00000057882	415204	NA	Dr.76713	arpc3	actin related protein 2/3 complex, subunit 3	actin related protein 2/3 complex, subunit 3	ZDB-GENE-040625-107	arpc3	2	2	2	1	2	2	22212	21	16987366	16992828
MAD_Dr_004_503431	NM_200814.1	3	0	gi|503431 ; gi|102921 ; gi|114943	1	1	-2	NM_200814.1	NM_200814	pcbd1	ENSDARG00000031981	393787	6-pyruvoyl-tetrahydropterin synthase/dimerization	NA	NA	NA	6-pyruvoyl-tetrahydropterin synthase/dimerization cofactor of hepatocyte nuclear factor 1 alpha (TCF1)	ZDB-GENE-040426-1787	pcbd1	2	2	2	1	2	2	22212	13	25590519	25596084
MAD_Dr_004_199232	Dr.13693	1	1	NM_001077468.1	0	1	99566	NA	NA	NA	ENSDARG00000003846	768305	NA	Dr.13693	zgc:153377	zgc:153377	zgc:153377	ZDB-GENE-061027-183	mrpl21	2	2	2	1	2	2	22212	7	72154637	72161865
MAD_Dr_004_104431	OTTDART00000039696	3	1	OTTDART00000039695 ; Dr.142777 ; XM_001344175.2	0	1	104556	NA	NA	NA	ENSDARG00000055498	8388607	NA	NA	NA	NA	NA	NA	NA	2	2	2	1	2	2	22212	2	5449942	5477837
MAD_Dr_004_167847	ENSDART00000078975	4	0	OTTDART00000024345 ; NM_001029966.2 ; OTTDART00000024346 ; Dr.5347	0	1	50730	NA	NA	NA	ENSDARG00000056475	791478	NA	NA	NA	NA	tRNA selenocysteine 1 associated protein 1, like	ZDB-GENE-040426-2386	trnau1apb	2	2	2	1	2	2	22212	2	24654984	24661785
MAD_Dr_004_167857	NM_001014367.1 ; Dr.135387	1	0	OTTDART00000029470	0	1	50743	NM_001014367.1	NM_001014367	zgc:110783	ENSDARG00000070487	378742	zgc:110783	Dr.135387	zgc:110783	zgc:110783	zgc:110783	ZDB-GENE-050327-95	zgc:110783	2	2	2	1	2	2	22212	17	45489356	45499490
MAD_Dr_004_161292	OTTDART00000024180 ; ENSDART00000022765	2	0	Dr.77784 ; NM_212995.1	0	1	41300	NA	NA	NA	ENSDARG00000016399	406268	NA	NA	NA	NA	RIO kinase 1 (yeast)	ZDB-GENE-040426-1927	riok1	2	2	2	1	2	2	22212	2	21405598	21418508
MAD_Dr_004_106336	OTTDART00000034896	0	-	-	0	1	106553	NA	NA	NA	ENSDARG00000074720	558400	NA	NA	NA	NA	similar to conserved hypothetical protein	ZDB-GENE-081104-235	si:ch211-51h9.7	2	2	2	1	2	2	22212	8	2517450	2520556
MAD_Dr_004_106772	Dr.148890	2	0	OTTDART00000028920 ; Dr.17325	0	1	106974	NA	NA	NA	ENSDARG00000045352	792225	NA	Dr.148890	zgc:56530	zgc:56530	zgc:56530	ZDB-GENE-040426-1065	cst14a	2	2	2	1	2	2	22212	24	20776144	20777295
MAD_Dr_004_155103	OTTDART00000014994 ; OTTDART00000014917	3	0	XR_029398.2 ; ENSDART00000101812 ; XR_045014.1	0	1	31897	NA	NA	NA	ENSDARG00000069780	561376	NA	NA	NA	NA	NA	ZDB-GENE-050419-188	pus7l	2	2	2	1	2	2	22212	4	14177585	14193405
MAD_Dr_004_108000	ENSDART00000101799	1	1	ENSDART00000110820	0	1	10823	NA	NA	NA	ENSDARG00000059741	100333928	NA	NA	NA	NA	NA	ZDB-GENE-140106-68	alpk1	2	2	2	1	2	2	22212	7	956558	981563
MAD_Dr_004_109098	NM_001109829.1	3	0	OTTDART00000034045 ; OTTDART00000034049 ; Dr.116492	0	1	109335	NM_001109829.1	NM_001109829	si:ch211-125e6.12	ENSDARG00000015081	100126100	si:ch211-125e6.12	NA	NA	NA	hypothetical LOC566620; si:ch211-125e6.14; si:ch211-125e6.12	ZDB-GENE-070912-36	si:ch211-125e6.12	2	2	2	1	2	2	22212	NA	NA	NA
MAD_Dr_004_109296	OTTDART00000018505	0	-	-	0	1	109531	NA	NA	NA	ENSDARG00000061377	558421	NA	NA	NA	NA	si:ch211-173p18.9	ZDB-GENE-040914-40	efcab1	2	2	2	1	2	2	22212	19	40595521	40599208
MAD_Dr_004_111103	OTTDART00000015796 ; NM_001044862.1 ; Dr.12216	2	1	ENSDART00000088541 ; ENSDART00000088504	0	1	11141	NM_001044862.1	NM_001044862	si:dkey-12o15.1	ENSDARG00000061796	558453	si:dkey-12o15.1	Dr.12216	si:dkey-12o15.1	si:dkey-12o15.1	si:dkey-12o15.1	ZDB-GENE-050419-110	rasgrp4	2	2	2	1	2	2	22212	18	35761830	35821475
MAD_Dr_004_112472	OTTDART00000045081 ; OTTDART00000045080	1	1	Dr.34159	0	1	112792	NA	NA	NA	ENSDARG00000039777	550446	NA	NA	NA	NA	zgc:112097	ZDB-GENE-050417-268	ss18l2	2	2	2	1	2	2	22212	NA	NA	NA
MAD_Dr_004_167135	OTTDART00000024607	0	-	-	0	1	49705	NA	NA	NA	ENSDARG00000018106	394049	NA	NA	NA	NA	NA	ZDB-GENE-040426-1039	eif2b3	2	2	2	1	2	2	22212	2	34025737	34088834
MAD_Dr_004_115736	OTTDART00000034045	3	0	NM_001109829.1 ; OTTDART00000034049 ; Dr.116492	0	1	116158	NA	NA	NA	ENSDARG00000092090	8388607	NA	NA	NA	NA	NA	ZDB-GENE-070912-36	si:ch211-125e6.12	2	2	2	1	2	2	22212	9	33406199	33407523
MAD_Dr_004_149312	OTTDART00000015105	0	-	-	0	1	23547	NA	NA	NA	ENSDARG00000057286	562490	NA	NA	NA	NA	NA	ZDB-GENE-030131-3587	swap70b	2	2	2	1	2	2	22212	18	16887767	16927774
MAD_Dr_004_116256	OTTDART00000034057	5	0	OTTDART00000034056 ; OTTDART00000034045 ; OTTDART00000034049 ; NM_001109829.1 ; Dr.116492	0	1	116670	NA	NA	NA	ENSDARG00000094370	566620	NA	NA	NA	NA	hypothetical LOC566620; si:ch211-125e6.14; si:ch211-125e6.12	ZDB-GENE-070912-37	si:ch211-125e6.13	2	2	2	1	2	2	22212	9	33406199	33410924
MAD_Dr_004_116398	ENSDART00000059198	1	1	OTTDART00000027385	0	1	11690	NA	NA	NA	ENSDARG00000040445	-	NA	NA	NA	NA	si:ch211-219a4.3	ZDB-GENE-070424-157	si:ch211-219a4.3	2	2	2	1	2	2	22212	9	23954718	23968628
MAD_Dr_004_152191	OTTDART00000037054	1	1	Dr.76201	0	1	27444	NA	NA	NA	ENSDARG00000044265	569357	NA	NA	NA	NA	CDC37 cell division cycle 37 homolog (S. cerevisiae)-like 1	ZDB-GENE-030131-8865	cdc37l1	2	2	2	1	2	2	22212	10	11014557	11040261
MAD_Dr_004_119210	OTTDART00000017415	11	0	XM_001334691.2 ; OTTDART00000017383 ; ENSDART00000106237 ; Dr.120024 ; NM_001128243.1 ; OTTDART00000017382 ; ENSDART00000106253 ; OTTDART00000017409 ; OTTDART00000017407 ; XM_001919805.1 ; XM_001919764.1	0	1	119629	NA	NA	NA	ENSDARG00000095455	-	NA	NA	NA	NA	NA	ZDB-GENE-060503-905	si:dkey-20i20.10	2	2	2	1	2	2	22212	22	2752970	2757542
MAD_Dr_004_169930	OTTDART00000032395	0	-	-	0	1	53987	NA	NA	NA	ENSDARG00000003058	415215	NA	NA	NA	NA	NA	ZDB-GENE-090417-1	fgfr1op	2	2	2	1	2	2	22212	20	30676088	30707293
MAD_Dr_004_120080	ENSDART00000105427	0	-	-	0	1	120496	NA	NA	NA	ENSDARG00000071336	751093	NA	NA	NA	NA	macrophage migration inhibitory factor	ZDB-GENE-080708-1	mif	2	2	2	1	2	2	22212	14	49972321	49982453
MAD_Dr_004_120146	ENSDART00000105123 ; OTTDART00000012038	1	0	Dr.79304	0	1	120559	NA	NA	NA	ENSDARG00000092219	562807	NA	NA	NA	NA	NA	ZDB-GENE-030131-6052	si:ch211-250e5.16	2	2	2	1	2	2	22212	NA	NA	NA
MAD_Dr_004_176706	NM_001037406.1	5	0	XM_001918531.1 ; ENSDART00000113711 ; XM_701526.3 ; OTTDART00000038493 ; OTTDART00000038494	0	1	64192	NM_001037406.1	NM_001037406	zgc:123335	ENSDARG00000074071	641417	zgc:123335	NA	NA	NA	zgc:123335; hypothetical LOC572418; hypothetical protein LOC100149125	ZDB-GENE-051113-228	zgc:123335	2	2	2	1	2	2	22212	14	16464302	16469534
MAD_Dr_004_187605	ENSDART00000015377	0	-	-	0	1	81566	NA	NA	NA	ENSDARG00000005128	393241	NA	NA	NA	NA	ribonuclease H2, subunit B	ZDB-GENE-040426-1090	rnaseh2b	2	2	2	1	2	2	22212	9	29860807	29868426
MAD_Dr_004_128080	NM_001020710.1 ; Dr.79121	2	1	OTTDART00000015354 ; ENSDART00000079253	0	1	12807	NM_001020710.1	NM_001020710	pskh1	ENSDARG00000056713	554840	protein serine kinase H1	Dr.79121	pskh1	protein serine kinase H1	protein serine kinase H1	ZDB-GENE-050119-1	pskh1	2	2	2	1	2	2	22212	18	21739128	21759742
MAD_Dr_004_164831	NM_200324.1 ; Dr.80525	2	1	ENSDART00000006927 ; OTTDART00000010886	0	1	46281	NM_200324.1	NM_200324	zgc:56402	ENSDARG00000007250	393294	zgc:56402	Dr.80525	zgc:56402	zgc:56402	zgc:56402	ZDB-GENE-040426-1015	use1	2	2	2	1	2	2	22212	22	11041160	11049386
MAD_Dr_004_133059	OTTDART00000018523	0	-	-	0	1	132627	NA	NA	NA	ENSDARG00000092124	568423	NA	NA	NA	NA	hypothetical LOC568423	NA	NA	2	2	2	1	2	2	22212	22	5722411	5726538
MAD_Dr_004_133616	ENSDART00000056048	6	0	Dr.76983 ; NM_001017602.1 ; ENSDART00000089963 ; ENSDART00000056047 ; XM_001331055.2 ; ENSDART00000067606	0	1	133210	NA	NA	NA	ENSDARG00000073876	100333040	NA	NA	NA	NA	NA	NA	NA	2	2	2	1	2	2	22212	11	42184132	42202895
MAD_Dr_004_133850	ENSDART00000040733	1	0	ENSDART00000064459	0	1	133418	NA	NA	NA	ENSDARG00000029461	-	NA	NA	NA	NA	si:ch211-214k5.1	ZDB-GENE-061207-22	cd209	2	2	2	1	2	2	22212	10	25002021	25059075
MAD_Dr_004_135431	OTTDART00000011630	0	-	-	0	1	13502	NA	NA	NA	ENSDARG00000005458	554152	NA	NA	NA	NA	casein kinase 1, gamma 2a	ZDB-GENE-030131-6445	csnk1g2a	2	2	2	1	2	2	22212	2	23383390	23423097
MAD_Dr_004_177247	ENSDART00000114395	5	0	OTTDART00000023070 ; ENSDART00000051831 ; NM_001077760.1 ; ENSDART00000097267 ; Dr.121164	0	1	65012	NA	NA	NA	ENSDARG00000035734	-	NA	NA	NA	NA	NA	ZDB-GENE-061110-40	zgc:152816	2	2	2	1	2	2	22212	NA	NA	NA
MAD_Dr_004_140598	ENSDART00000060458	15	0	OTTDART00000007553 ; OTTDART00000007556 ; Dr.148880 ; ENSDART00000112693 ; XM_684022.3 ; OTTDART00000007552 ; Dr.148892 ; Dr.113640 ; ENSDART00000043688 ; OTTDART00000007551 ; NM_001102628.1 ; Dr.119664 ; OTTDART00000007559 ; Dr.150938 ; NM_001045141.2	0	1	140182	NA	NA	NA	ENSDARG00000086956	-	NA	NA	NA	NA	si:dkey-241l7.4	ZDB-GENE-041014-239	si:dkey-241l7.3	2	2	2	1	2	2	22212	20	54238332	54246400
MAD_Dr_004_141537	ENSDART00000018939 ; ENSDART00000111424	0	1		0	1	141051	NA	NA	NA	ENSDARG00000076225	-	NA	NA	NA	NA	NA	ZDB-GENE-040704-14	tha1	2	2	2	1	2	2	22212	12	34277670	34296076
MAD_Dr_004_143347	OTTDART00000016131	1	1	OTTDART00000016130	0	1	15566	NA	NA	NA	ENSDARG00000017126	393639	NA	NA	NA	NA	ilvB (bacterial acetolactate synthase)-like	ZDB-GENE-040426-1623	ilvbl	2	2	2	1	2	2	22212	18	44775375	44798437
MAD_Dr_004_142422	NM_001002660.1 ; Dr.32020	3	1	OTTDART00000010474 ; OTTDART00000010475 ; ENSDART00000062993	0	1	14382	NM_001002660.1	NM_001002660	sesn1	ENSDARG00000020693	436933	sestrin 1	Dr.32020	si:ch211-51a19.4	si:ch211-51a19.4	sestrin 1	ZDB-GENE-040718-408	sesn1	2	2	2	1	2	2	22212	20	32249476	32328278
MAD_Dr_004_143421	OTTDART00000030371	0	-	-	0	1	15655	NA	NA	NA	ENSDARG00000067984	777760	NA	NA	NA	NA	NA	ZDB-GENE-050302-79	gas1b	2	2	2	1	2	2	22212	5	31760183	31763219
MAD_Dr_004_143835	NM_001077606.1 ; Dr.42522	2	1	ENSDART00000088954 ; OTTDART00000031855	0	1	16225	NM_001077606.1	NM_001077606	zgc:154007	ENSDARG00000061948	559784	zgc:154007	Dr.42522	zgc:154007	zgc:154007	zgc:154007	ZDB-GENE-061103-307	amotl2b	2	2	2	1	2	2	22212	2	23196181	23205527
MAD_Dr_004_143993	ENSDART00000007211	0	-	-	0	1	16441	NA	NA	NA	ENSDARG00000013245	555492	NA	NA	NA	NA	si:ch211-67n3.1	ZDB-GENE-030131-1961	wbp1la	2	2	2	1	2	2	22212	13	28449907	28466315
MAD_Dr_004_152479	NM_001040389.1	1	1	ENSDART00000100620	0	1	27829	NM_001040389.1	NM_001040389	si:dkeyp-50f7.2	ENSDARG00000069251	334036	si:dkeyp-50f7.2	NA	NA	NA	si:dkeyp-50f7.2	ZDB-GENE-030131-5968	si:dkeyp-50f7.2	2	2	2	1	2	2	22212	20	43839944	43846622
MAD_Dr_004_146946	OTTDART00000026113	0	-	-	0	1	20248	NA	NA	NA	ENSDARG00000011879	266748	NA	NA	NA	NA	NA	ZDB-GENE-021008-1	foxn1	2	2	2	1	2	2	22212	15	28196807	28215438
MAD_Dr_004_147791	Dr.89016 ; ENSDART00000049466	0	1		0	1	21458	NA	NA	NA	ENSDARG00000004722	565333	NA	Dr.89016	ddr2b	discoidin domain receptor family, member 2b	discoidin domain receptor family, member 2b	ZDB-GENE-041210-162	ddr2l	2	2	2	1	2	2	22212	NA	NA	NA
MAD_Dr_004_149122	ENSDART00000028085	0	-	-	0	1	23290	NA	NA	NA	ENSDARG00000013845	541501	NA	NA	NA	NA	zgc:113259	ZDB-GENE-050327-26	ttc14	2	2	2	1	2	2	22212	22	37653610	37676763
MAD_Dr_004_149799	ENSDART00000113616 ; ENSDART00000078886	1	0	NM_001114700.1	0	1	24169	NA	NA	NA	ENSDARG00000074764	-	NA	NA	NA	NA	NA	ZDB-GENE-080212-2	zgc:171426	2	2	2	1	2	2	22212	3	3687347	3699510
MAD_Dr_004_150365	NM_001110459.1 ; Dr.84624 ; ENSDART00000090867	1	1	OTTDART00000038631	0	1	24949	NM_001110459.1	NM_001110459	btbd10a	ENSDARG00000062674	560466	BTB (POZ) domain containing 10a	Dr.84624	btbd10a	BTB (POZ) domain containing 10a	BTB (POZ) domain containing 10a	ZDB-GENE-070410-41	btbd10a	2	2	2	1	2	2	22212	25	17765938	17796311
MAD_Dr_004_151248	NM_201465.2 ; Dr.105519	1	0	ENSDART00000025570	0	1	26154	NM_201465.2	NM_201465	calrl	ENSDARG00000020103	321315	calreticulin like	Dr.105519	id:ibd1087	id:ibd1087	calreticulin like	ZDB-GENE-030131-9907	calr3b	2	2	2	1	2	2	22212	NA	NA	NA
MAD_Dr_004_151298	OTTDART00000024121	3	0	ENSDART00000081094 ; Dr.9109 ; NM_001007415.1	0	1	26214	NA	NA	NA	ENSDARG00000058267	492774	NA	NA	NA	NA	NA	ZDB-GENE-041114-120	glmna	2	2	2	1	2	2	22212	2	11037528	11074299
MAD_Dr_004_151388	NM_001020632.1	1	1	OTTDART00000023211	0	1	26332	NM_001020632.1	NM_001020632	banp	ENSDARG00000017562	553659	BTG3 associated nuclear protein	NA	NA	NA	BTG3 associated nuclear protein	ZDB-GENE-050522-54	banp	2	2	2	1	2	2	22212	25	30017321	30107293
MAD_Dr_004_151846	NM_199792.1 ; Dr.26610	1	0	ENSDART00000015712	0	1	26916	NM_199792.1	NM_199792	zgc:66441	ENSDARG00000014680	327348	zgc:66441	Dr.26610	zgc:66441	zgc:66441	zgc:66441	ZDB-GENE-030131-5559	znf710a	2	2	2	1	2	2	22212	18	26061596	26110160
MAD_Dr_004_152263	OTTDART00000040725	3	1	ENSDART00000057052 ; Dr.26603 ; NM_200411.1	0	1	27528	NA	NA	NA	ENSDARG00000039069	393383	NA	NA	NA	NA	zgc:64090	ZDB-GENE-040426-1365	slx4ip	2	2	2	1	2	2	22212	13	35265777	35346699
MAD_Dr_004_502261	ENSDART00000103388	5	0	gi|502261 ; gi|152370 ; gi|193919 ; gi|145151 ; gi|192805	1	1	-2	NA	NA	NA	ENSDARG00000070709	100002462	NA	NA	NA	NA	wu:fi42e03	ZDB-GENE-030131-6284	wu:fi42e03	2	2	2	1	2	2	22212	11	29290370	29292977
MAD_Dr_004_154374	NM_001020709.1	1	0	XM_001918505.1	0	1	30851	NM_001020709.1	NM_001020709	zgc:113030	ENSDARG00000069869	553738	zgc:113030	NA	NA	NA	hypothetical protein LOC100149696; zgc:113030	ZDB-GENE-050522-528	zgc:113030	2	2	2	1	2	2	22212	3	59753679	59783062
MAD_Dr_004_154439	NM_001130657.1	1	1	ENSDART00000106374	0	1	30992	NM_001130657.1	NM_001130657	zgc:173693	ENSDARG00000074868	100170822	zgc:173693	NA	NA	NA	zgc:173693; similar to Zinc finger protein 658	ZDB-GENE-050420-215	si:dkey-4c15.16	2	2	2	1	2	2	22212	22	2239450	2324132
MAD_Dr_004_154780	ENSDART00000109223	1	1	OTTDART00000044488	0	1	3146	NA	NA	NA	ENSDARG00000075825	-	NA	NA	NA	NA	NA	ZDB-GENE-091204-65	dlec1	2	2	2	1	2	2	22212	24	20186198	20225192
MAD_Dr_004_189622	OTTDART00000022075	2	1	ENSDART00000101168 ; OTTDART00000022074	0	1	88130	NA	NA	NA	ENSDARG00000003217	323901	NA	NA	NA	NA	NA	ZDB-GENE-030131-2621	urb2	2	2	2	1	2	2	22212	13	24103882	24130159
MAD_Dr_004_155996	Dr.75100	3	1	ENSDART00000051549 ; NM_131327.1 ; OTTDART00000019467	0	1	33905	NA	NA	NA	ENSDARG00000035559	30590	NA	Dr.75100	tp53	tumor protein p53	tumor protein p53	ZDB-GENE-990415-270	tp53	2	2	2	1	2	2	22212	5	23582427	23594005
MAD_Dr_004_156188	NM_001136487.1 ; Dr.149198	0	1		0	1	3414	NM_001136487.1	NM_001136487	zswim6	ENSDARG00000041129	403057	zinc finger, SWIM-type containing 6	Dr.149198	zswim6	zinc finger, SWIM-type containing 6	zinc finger, SWIM-type containing 6	ZDB-GENE-060602-4	zswim6	2	2	2	1	2	2	22212	NA	NA	NA
MAD_Dr_004_156220	OTTDART00000007298	2	1	Dr.117042 ; XM_694183.3	0	1	34224	NA	NA	NA	ENSDARG00000023609	570677	NA	NA	NA	NA	NA	ZDB-GENE-041014-269	epha8	2	2	2	1	2	2	22212	11	38449178	38609409
MAD_Dr_004_161081	XM_679063.3 ; Dr.34911	1	1	ENSDART00000091531	0	1	41017	XM_679063.3	XM_679063	NA	ENSDARG00000020395	569564	NA	Dr.34911	si:ch211-192p3.1	si:ch211-192p3.1	novel protein similar to human microtubule associated monoxygenase, calponin and LIM domain containing 2 (MICAL2)	ZDB-GENE-061207-15	mical2b	2	2	2	1	2	2	22212	25	16098050	16212604
MAD_Dr_004_157961	ENSDART00000018091	0	-	-	0	1	3668	NA	NA	NA	ENSDARG00000016573	-	NA	NA	NA	NA	NA	ZDB-GENE-090806-2	mroh1	2	2	2	1	2	2	22212	16	31301093	31387319
MAD_Dr_004_158354	OTTDART00000036641	0	-	-	0	1	3729	NA	NA	NA	ENSDARG00000032327	327239	NA	NA	NA	NA	ubiquitin specific peptidase 36	ZDB-GENE-030131-5450	usp36	2	2	2	1	2	2	22212	3	57513132	57560267
MAD_Dr_004_159530	ENSDART00000114970	2	0	Dr.132687 ; NM_001104942.1	0	1	38953	NA	NA	NA	ENSDARG00000078054	568360	NA	NA	NA	NA	zgc:171223	ZDB-GENE-070928-7	zgc:171223	2	2	2	1	2	2	22212	NA	NA	NA
MAD_Dr_004_159406	OTTDART00000008704 ; NM_001045057.1	3	0	ENSDART00000067262 ; Dr.17382 ; NM_001040246.1	0	1	38805	NM_001045057.1	NM_001045057	si:dkey-21h14.1	ENSDARG00000045754	564543	si:dkey-21h14.1	NA	NA	NA	si:dkey-21h14.1	NA	NA	2	2	2	1	2	2	22212	4	11031872	11054826
MAD_Dr_004_159571	ENSDART00000100772	1	1	OTTDART00000043150	0	1	39015	NA	NA	NA	ENSDARG00000061120	494042	NA	NA	NA	NA	zgc:103664	ZDB-GENE-041212-6	slc43a2b	2	2	2	1	2	2	22212	10	24403277	24422264
MAD_Dr_004_161213	ENSDART00000115375	1	1	NM_001113577.1	0	1	41192	NA	NA	NA	ENSDARG00000074365	-	NA	NA	NA	NA	zgc:174573	ZDB-GENE-080220-13	zgc:171901	2	2	2	1	2	2	22212	15	712181	793840
MAD_Dr_004_161223	ENSDART00000111309	0	-	-	0	1	41203	NA	NA	NA	ENSDARG00000077911	795901	NA	NA	NA	NA	NA	ZDB-GENE-070912-84	treh	2	2	2	1	2	2	22212	18	43853482	43872547
MAD_Dr_004_181397	ENSDART00000108494	2	1	ENSDART00000078378 ; Dr.82387	0	1	72022	NA	NA	NA	ENSDARG00000055966	373114	NA	NA	NA	NA	CASP8 and FADD-like apoptosis regulator	ZDB-GENE-030826-3	cflara	2	2	2	1	2	2	22212	11	30085775	30094247
MAD_Dr_004_162028	OTTDART00000033544	0	-	-	0	1	42402	NA	NA	NA	ENSDARG00000012995	406809	NA	NA	NA	NA	NA	ZDB-GENE-040426-2877	actr5	2	2	2	1	2	2	22212	NA	NA	NA
MAD_Dr_004_163138	NM_001122845.1	6	0	Dr.113743 ; XM_001922149.1 ; ENSDART00000073862 ; Dr.151196 ; XM_001331834.2 ; ENSDART00000073836	0	1	43936	NM_001122845.1	NM_001122845	zgc:174890	ENSDARG00000052086	792547	zgc:174890	NA	NA	NA	zgc:172007; similar to zinc finger protein 568; hypothetical protein LOC100151227; zgc:174890; similar to zinc finger protein 782	ZDB-GENE-080220-14	zgc:174928	2	2	2	1	2	2	22212	NA	NA	NA
MAD_Dr_004_163191	OTTDART00000014369 ; ENSDART00000092104 ; NM_001082808.1 ; Dr.79151	0	1		0	1	4401	NM_001082808.1	NM_001082808	pxk	ENSDARG00000063195	557065	PX domain containing serine/threonine kinase	Dr.79151	pxk	PX domain containing serine/threonine kinase	PX domain containing serine/threonine kinase	ZDB-GENE-050208-393	pxk	2	2	2	1	2	2	22212	22	10136595	10169385
MAD_Dr_004_165712	ENSDART00000043956	3	0	OTTDART00000031827 ; Dr.17305 ; NM_001082806.1	0	1	47672	NA	NA	NA	ENSDARG00000029848	556635	NA	NA	NA	NA	zgc:161973	ZDB-GENE-070410-13	zgc:161973	2	2	2	1	2	2	22212	2	23004136	23021368
MAD_Dr_004_165295	NM_001159823.1 ; Dr.88367	0	1		0	1	47032	NM_001159823.1	NM_001159823	zgc:110145	ENSDARG00000038016	553589	zgc:110145	Dr.88367	zgc:110145	zgc:110145	zgc:110145	ZDB-GENE-050522-203	lyrm5a	2	2	2	1	2	2	22212	NA	NA	NA
MAD_Dr_004_166501	NM_001002311.1 ; Dr.80306	2	0	ENSDART00000075347 ; OTTDART00000024822	0	1	48795	NM_001002311.1	NM_001002311	lrrc6	ENSDARG00000053318	432388	leucine rich repeat containing 6	Dr.80306	lrrc6	leucine rich repeat containing 6	leucine rich repeat containing 6	ZDB-GENE-040827-2	lrrc6	2	2	2	1	2	2	22212	2	43248819	43274531
MAD_Dr_004_168313	OTTDART00000031243	1	0	NM_200331.1	0	1	51405	NA	NA	NA	ENSDARG00000011723	393302	NA	NA	NA	NA	zgc:56556	ZDB-GENE-040426-1078	zgc:56556	2	2	2	1	2	2	22212	2	28302006	28319894
MAD_Dr_004_166879	ENSDART00000012659	0	-	-	0	1	49356	NA	NA	NA	ENSDARG00000016538	-	NA	NA	NA	NA	zgc:55888	NA	NA	2	2	2	1	2	2	22212	4	9466133	9475502
MAD_Dr_004_168287	OTTDART00000007262	1	1	Dr.48479	0	1	51362	NA	NA	NA	ENSDARG00000052471	567105	NA	NA	NA	NA	TATA box binding protein (TBP)-associated factor, RNA polymerase I, A	ZDB-GENE-041014-272	taf1a	2	2	2	1	2	2	22212	20	52001527	52062383
MAD_Dr_004_501560	ENSDART00000063738	2	1	gi|501560 ; gi|169069	1	1	-2	NA	NA	NA	ENSDARG00000043417	450045	NA	NA	NA	NA	zgc:101720	ZDB-GENE-041010-167	tssc1	2	2	2	1	2	2	22212	17	51173516	51218972
MAD_Dr_004_171397	OTTDART00000012454	1	0	NM_001080175.1	0	1	56166	NA	NA	NA	ENSDARG00000063212	558841	NA	NA	NA	NA	protein arginine methyltransferase 2	ZDB-GENE-041104-1	prmt2	2	2	2	1	2	2	22212	9	9981690	9989567
MAD_Dr_004_169357	NM_001111155.1	16	0	NM_001130803.1 ; ENSDART00000111627 ; Dr.84721 ; XM_001923907.1 ; XR_044958.1 ; XM_001918719.1 ; Dr.93086 ; XM_001920282.1 ; ENSDART00000102369 ; NM_001114433.1 ; Dr.129603 ; Dr.117403 ; XM_001919472.1 ; XM_001919119.1 ; XM_001922424.1 ; Dr.116054	0	1	52955	NM_001111155.1	NM_001111155	zgc:174651	ENSDARG00000077984	557295	zgc:174651	NA	NA	NA	zgc:174649; similar to Zinc finger protein 180 (HHZ168); hypothetical LOC570013; zgc:174651; similar to zinc finger protein 560; zgc:173603	ZDB-GENE-080218-9	zgc:174651	2	2	2	1	2	2	22212	NA	NA	NA
MAD_Dr_004_170979	NM_001089361.1 ; Dr.86625 ; OTTDART00000036032 ; ENSDART00000036605	0	1		0	1	55478	NM_001089361.1	NM_001089361	zgc:162619	ENSDARG00000076718	557370	zgc:162619	Dr.86625	zgc:162619	zgc:162619	zgc:162619	ZDB-GENE-050309-206	prkra	2	2	2	1	2	2	22212	9	1363459	1369231
MAD_Dr_004_173295	ENSDART00000098472	0	-	-	0	1	59076	NA	NA	NA	ENSDARG00000068193	751636	NA	NA	NA	NA	zgc:153362	ZDB-GENE-060825-65	tmem44	2	2	2	1	2	2	22212	11	33938751	33956779
MAD_Dr_004_174250	OTTDART00000024386	2	0	Dr.79370 ; NM_199747.1	0	1	60497	NA	NA	NA	ENSDARG00000030591	326793	NA	NA	NA	NA	leucine rich repeat containing 42	ZDB-GENE-030131-4992	lrrc42	2	2	2	1	2	2	22212	2	26949139	26955399
MAD_Dr_004_173792	ENSDART00000008062	0	-	-	0	1	59814	NA	NA	NA	ENSDARG00000025346	-	NA	NA	NA	NA	zinc finger protein 277	NA	NA	2	2	2	1	2	2	22212	25	21618715	21646374
MAD_Dr_004_174290	OTTDART00000005013	0	-	-	0	1	60545	NA	NA	NA	ENSDARG00000043561	415181	NA	NA	NA	NA	NA	ZDB-GENE-040625-69	psmc1b	2	2	2	1	2	2	22212	20	16822350	16841374
MAD_Dr_004_174315	OTTDART00000037186	0	-	-	0	1	60581	NA	NA	NA	ENSDARG00000023279	550287	NA	NA	NA	NA	NA	ZDB-GENE-050417-96	psmd4b	2	2	2	1	2	2	22212	16	9871359	9887026
MAD_Dr_004_174729	OTTDART00000028768	0	-	-	0	1	61202	NA	NA	NA	ENSDARG00000045606	792266	NA	NA	NA	NA	alkB, alkylation repair homolog 3 (E. coli)	ZDB-GENE-040801-254	alkbh3	2	2	2	1	2	2	22212	25	29790669	29820511
MAD_Dr_004_175563	OTTDART00000020970	0	-	-	0	1	62488	NA	NA	NA	ENSDARG00000035631	445275	NA	NA	NA	NA	NA	ZDB-GENE-040808-46	sdf2l1	2	2	2	1	2	2	22212	5	12808314	12815509
MAD_Dr_004_177050	OTTDART00000020071	0	-	-	0	1	64720	NA	NA	NA	ENSDARG00000032516	321183	NA	NA	NA	NA	NA	ZDB-GENE-030131-9751	rrp36	2	2	2	1	2	2	22212	22	15317570	15326163
MAD_Dr_004_179827	NM_212878.1 ; Dr.75408	2	1	ENSDART00000019392 ; OTTDART00000027317	0	1	69045	NM_212878.1	NM_212878	zgc:76925	ENSDARG00000016233	405814	zgc:76925	Dr.75408	zgc:76925	zgc:76925	zgc:76925	ZDB-GENE-040426-2049	sdr16c5a	2	2	2	1	2	2	22212	2	11699473	11720748
MAD_Dr_004_177794	OTTDART00000013067	0	-	-	0	1	65917	NA	NA	NA	ENSDARG00000094597	-	NA	NA	NA	NA	NA	ZDB-GENE-041210-335	si:dkey-207j16.5	2	2	2	1	2	2	22212	4	10750671	10753463
MAD_Dr_004_181357	OTTDART00000015792 ; NM_001080166.1	2	0	ENSDART00000088488 ; Dr.80495	0	1	71967	NM_001080166.1	NM_001080166	opa3	ENSDARG00000061761	497278	optic atrophy 3	NA	NA	NA	optic atrophy 3	ZDB-GENE-050210-1	opa3	2	2	2	1	2	2	22212	18	35857744	35861546
MAD_Dr_004_179391	OTTDART00000012326	1	1	OTTDART00000036961	0	1	68421	NA	NA	NA	ENSDARG00000003822	550225	NA	NA	NA	NA	NA	ZDB-GENE-041210-253	ankrd16	2	2	2	1	2	2	22212	4	11459229	11463853
MAD_Dr_004_179607	ENSDART00000074085	2	0	Dr.143785 ; ENSDART00000056088	0	1	68744	NA	NA	NA	ENSDARG00000090237	114439	NA	NA	NA	NA	zona pellucida glycoprotein 2.3	ZDB-GENE-010622-2	zp2.3	2	2	2	1	2	2	22212	20	54420769	54445247
MAD_Dr_004_179741	OTTDART00000022961	0	-	-	0	1	68920	NA	NA	NA	ENSDARG00000039400	393538	NA	NA	NA	NA	NA	ZDB-GENE-040426-1495	polr1c	2	2	2	1	2	2	22212	13	28559905	28564474
MAD_Dr_004_181889	ENSDART00000018190	3	1	Dr.83024 ; NM_001045845.1 ; OTTDART00000038728	0	1	72933	NA	NA	NA	ENSDARG00000003582	555710	NA	NA	NA	NA	hypothetical protein LOC100149971; zgc:153293	ZDB-GENE-060825-315	zgc:153293	2	2	2	1	2	2	22212	NA	NA	NA
MAD_Dr_004_500773	Dr.75593	4	0	gi|503297 ; gi|500773 ; gi|180928 ; gi|175138	1	1	-2	NA	NA	NA	ENSDARG00000055415	555180	NA	Dr.75593	zp2l1	zona pellucida glycoprotein 2, like 1	zona pellucida glycoprotein 2, like 1	ZDB-GENE-060818-3	zp2l1	2	2	2	1	2	2	22212	9	35822255	35824642
MAD_Dr_004_181041	ENSDART00000005847 ; OTTDART00000009669	0	1		0	1	712	NA	NA	NA	ENSDARG00000005476	567779	NA	NA	NA	NA	neuron navigator 3	ZDB-GENE-021205-1	nav3	2	2	2	1	2	2	22212	4	21091925	21266589
MAD_Dr_004_181884	OTTDART00000035688 ; ENSDART00000097960	7	1	OTTDART00000035692 ; NM_001030284.1 ; ENSDART00000082504 ; OTTDART00000035687 ; ENSDART00000082506 ; Dr.77011 ; NM_001037423.1	0	1	72928	NA	NA	NA	ENSDARG00000059398	641483	NA	NA	NA	NA	myelin expression factor 2	ZDB-GENE-051120-114	myef2	2	2	2	1	2	2	22212	18	5552073	5567123
MAD_Dr_004_182512	NM_212734.1 ; Dr.82081 ; OTTDART00000028553	1	0	OTTDART00000028552	0	1	73918	NM_212734.1	NM_212734	zgc:77556	ENSDARG00000016856	335176	zgc:77556	Dr.82081	zgc:77556	zgc:77556	zgc:77556	ZDB-GENE-030131-7116	pon2	2	2	2	1	2	2	22212	16	24754851	24757887
MAD_Dr_004_183511	OTTDART00000029012	0	-	-	0	1	75516	NA	NA	NA	ENSDARG00000021589	445087	NA	NA	NA	NA	NA	ZDB-GENE-040801-222	tmem60	2	2	2	1	2	2	22212	25	21179824	21182930
MAD_Dr_004_183729	NM_001077319.1 ; Dr.28311	2	0	OTTDART00000038068 ; OTTDART00000038066	0	1	75842	NM_001077319.1	NM_001077319	zgc:152997	ENSDARG00000037783	768176	zgc:152997	Dr.28311	zgc:152997	zgc:152997	zgc:152997	ZDB-GENE-061013-403	proza	2	2	2	1	2	2	22212	3	62146031	62156823
MAD_Dr_004_184161	OTTDART00000031098	0	-	-	0	1	76501	NA	NA	NA	ENSDARG00000088260	796385	NA	NA	NA	NA	NA	ZDB-GENE-070705-490	gig2p	2	2	2	1	2	2	22212	5	57052046	57053712
MAD_Dr_004_184675	OTTDART00000028178	1	1	OTTDART00000028184	0	1	77242	NA	NA	NA	ENSDARG00000052030	799805	NA	NA	NA	NA	NA	ZDB-GENE-050417-118	akr1a1b	2	2	2	1	2	2	22212	6	33934123	33940742
MAD_Dr_004_187786	OTTDART00000031924 ; ENSDART00000083520 ; NM_001122704.1	2	1	Dr.77398 ; XM_001923648.1	0	1	81865	NM_001122704.1	NM_001122704	si:ch73-52e5.1	ENSDARG00000059795	569944	si:ch73-52e5.1	NA	NA	NA	si:ch73-52e5.1	ZDB-GENE-070912-340	si:ch73-52e5.1	2	2	2	1	2	2	22212	NA	NA	NA
MAD_Dr_004_185913	Dr.81859	2	0	ENSDART00000048727 ; NM_001002485.1	0	1	79152	NA	NA	NA	ENSDARG00000031153	436758	NA	Dr.81859	zgc:92862	zgc:92862	zgc:92862	ZDB-GENE-040718-188	mrps15	2	2	2	1	2	2	22212	NA	NA	NA
MAD_Dr_004_187424	OTTDART00000039871	0	-	-	0	1	81280	NA	NA	NA	ENSDARG00000079343	8388607	NA	NA	NA	NA	NA	ZDB-GENE-081104-191	si:ch211-241b2.4	2	2	2	1	2	2	22212	NA	NA	NA
MAD_Dr_004_188563	NM_001045375.1 ; Dr.81135	2	1	ENSDART00000100812 ; OTTDART00000043134	0	1	83295	NM_001045375.1	NM_001045375	rnasekb	ENSDARG00000069336	336290	ribonuclease, RNase K b	Dr.81135	rnasekb	ribonuclease, RNase K b	ribonuclease, RNase K b	ZDB-GENE-060825-160	rnasekb	2	2	2	1	2	2	22212	NA	NA	NA
MAD_Dr_004_188599	OTTDART00000005367	0	-	-	0	1	83350	NA	NA	NA	ENSDARG00000043307	-	NA	NA	NA	NA	NA	ZDB-GENE-030131-7915	srd5a3	2	2	2	1	2	2	22212	20	22294645	22299309
MAD_Dr_004_196440	ENSDART00000099030	9	0	OTTDART00000042942 ; OTTDART00000042941 ; Dr.148777 ; NM_198824.2 ; OTTDART00000037650 ; NM_001109856.1 ; NM_001109853.1 ; OTTDART00000028685 ; OTTDART00000028686	0	1	96740	NA	NA	NA	ENSDARG00000053448	794692	NA	NA	NA	NA	si:ch211-251f6.6	ZDB-GENE-030131-3219	si:ch211-251f6.6	2	2	2	1	2	2	22212	10	8086665	8101873
MAD_Dr_004_189787	OTTDART00000026767 ; ENSDART00000067512	2	1	NM_214697.1 ; Dr.80643	0	1	88338	NA	NA	NA	ENSDARG00000045928	326687	NA	NA	NA	NA	proteasome (prosome, macropain) subunit, alpha type, 4	ZDB-GENE-040426-1932	psma4	2	2	2	1	2	2	22212	25	6084275	6096165
MAD_Dr_004_189539	NM_001080636.1 ; Dr.41562	0	1		0	1	88022	NM_001080636.1	NM_001080636	zgc:158741	ENSDARG00000061407	791154	zgc:158741	Dr.41562	zgc:158741	zgc:158741	zgc:158741; hypothetical LOC569917	ZDB-GENE-090730-1	megf8	2	2	2	1	2	2	22212	NA	NA	NA
MAD_Dr_004_189547	NM_001024441.1 ; Dr.75941	0	1		0	1	88034	NM_001024441.1	NM_001024441	psma2	ENSDARG00000040121	554153	proteasome (prosome, macropain) subunit, alpha typ	Dr.75941	psma2	proteasome (prosome, macropain) subunit, alpha typ	si:rp71-45k5.4; proteasome (prosome, macropain) subunit, alpha type, 2	ZDB-GENE-050522-479	psma2	2	2	2	1	2	2	22212	16	43432815	43441112
MAD_Dr_004_191310	OTTDART00000033019	0	-	-	0	1	90458	NA	NA	NA	ENSDARG00000026904	8388607	NA	NA	NA	NA	NA	ZDB-GENE-070912-288	cbln13	2	2	2	1	2	2	22212	2	37892314	37895847
MAD_Dr_004_190533	Dr.140720	4	0	ENSDART00000099703 ; NM_001033739.1 ; ENSDART00000007636 ; Dr.123438	0	1	89355	NA	NA	NA	ENSDARG00000068846	100150238	NA	Dr.140720	NA	NA	similar to Lysosomal thioesterase PPT2 precursor (PPT-2)	ZDB-GENE-131125-23	si:ch73-95l15.3	2	2	2	1	2	2	22212	15	35075583	35080222
MAD_Dr_004_191508	Dr.8026	1	1	OTTDART00000040111	0	1	90737	NA	NA	NA	ENSDARG00000003373	436694	NA	Dr.8026	commd2	COMM domain containing 2	COMM domain containing 2	ZDB-GENE-040718-118	commd2	2	2	2	1	2	2	22212	22	38084383	38092097
MAD_Dr_004_192633	Dr.92775	3	0	ENSDART00000112766 ; XM_679260.3 ; ENSDART00000112850	0	1	92388	NA	NA	NA	ENSDARG00000073770	100005455	NA	Dr.92775	NA	NA	UPF0516 protein	ZDB-GENE-111107-1	mettl20	2	2	2	1	2	2	22212	NA	NA	NA
MAD_Dr_004_193199	OTTDART00000042941	9	0	ENSDART00000099030 ; Dr.148777 ; NM_198824.2 ; OTTDART00000042942 ; OTTDART00000037650 ; NM_001109856.1 ; NM_001109853.1 ; OTTDART00000028685 ; OTTDART00000028686	0	1	93148	NA	NA	NA	ENSDARG00000091558	-	NA	NA	NA	NA	NA	ZDB-GENE-091113-57	si:ch211-251f6.7	2	2	2	1	2	2	22212	10	8086655	8121032
MAD_Dr_004_195065	OTTDART00000031304	1	1	Dr.152325	0	1	95285	NA	NA	NA	ENSDARG00000069280	8388607	NA	NA	NA	NA	NA	ZDB-GENE-041008-211	tsen15	2	2	2	1	2	2	22212	2	10148301	10166501
MAD_Dr_004_196885	OTTDART00000017841	11	0	Dr.152412 ; XM_001922811.1 ; XM_001344176.2 ; ENSDART00000110496 ; ENSDART00000111925 ; Dr.94994 ; OTTDART00000017848 ; Dr.148504 ; ENSDART00000111649 ; ENSDART00000113640 ; OTTDART00000017839	0	1	97194	NA	NA	NA	ENSDARG00000089515	-	NA	NA	NA	NA	NA	NA	NA	2	2	2	1	2	2	22212	19	27984008	27986110
MAD_Dr_004_501108	ENSDART00000022147	3	1	gi|501108 ; gi|172823 ; gi|170046	1	1	-2	NA	NA	NA	ENSDARG00000014915	325712	NA	NA	NA	NA	NADH dehydrogenase (ubiquinone) 1, alpha/beta subc	ZDB-GENE-030131-4437	ndufab1b	2	2	2	1	2	2	22212	3	35405613	35411902
MAD_Dr_004_502620	ENSDART00000110560	2	1	gi|502620 ; gi|199017	1	1	-2	NA	NA	NA	ENSDARG00000075225	-	NA	NA	NA	NA	NA	ZDB-GENE-090313-86	si:ch211-223a10.1	2	2	2	1	2	2	22212	13	30939807	30961921
MAD_Dr_004_503758	OTTDART00000014177	24	0	gi|503758 ; gi|503287 ; gi|121381 ; gi|502343 ; gi|502341 ; gi|193377 ; gi|118703 ; gi|135624 ; gi|120920 ; gi|125838 ; gi|122374 ; gi|121973 ; gi|118888 ; gi|113325 ; gi|503286 ; gi|503108 ; gi|502340 ; gi|124149 ; gi|119474 ; gi|112274 ; gi|503736 ; gi|119602 ; gi|133332 ; gi|122315	1	1	-2	NA	NA	NA	ENSDARG00000088713	795554	NA	NA	NA	NA	NA	ZDB-GENE-050208-470	si:ch211-226h8.14	2	2	2	1	2	2	22212	22	25307696	25308923
MAD_Dr_004_503804	OTTDART00000017416	13	0	gi|503804 ; gi|502389 ; gi|142327 ; gi|113887 ; gi|176588 ; gi|145664 ; gi|503803 ; gi|116185 ; gi|195531 ; gi|500410 ; gi|188618 ; gi|166068 ; gi|108578	1	1	-2	NA	NA	NA	ENSDARG00000092027	-	NA	NA	NA	NA	NA	ZDB-GENE-060503-152	si:dkey-20i20.9	2	2	2	1	2	2	22212	22	2762334	2766211
MAD_Dr_004_142198	ENSDART00000112850	3	1	Dr.92775 ; XM_679260.3 ; ENSDART00000112766	0	1	141669	NA	NA	NA	ENSDARG00000079080	556444	NA	NA	NA	NA	NA	ZDB-GENE-111107-1	mettl20	2	2	2	1	2	2	22212	25	28464596	28483429
MAD_Dr_004_142912	ENSDART00000004854	0	-	-	0	1	1500	NA	NA	NA	ENSDARG00000006281	-	NA	NA	NA	NA	NA	ZDB-GENE-101124-2	myh11b	2	2	2	1	2	2	22212	NA	NA	NA
MAD_Dr_004_136611	ENSDART00000083024	3	0	OTTDART00000038062 ; Dr.81362 ; NM_001080019.1	0	1	13619	NA	NA	NA	ENSDARG00000059610	565192	NA	NA	NA	NA	G protein-coupled receptor 146	ZDB-GENE-050823-3	gpr146	2	2	2	1	2	2	22212	3	47734932	47765241
MAD_Dr_004_145451	NM_200111.1	2	1	ENSDART00000016071 ; OTTDART00000027341	0	1	1831	NM_200111.1	NM_200111	arhgap29b	ENSDARG00000017748	378998	Rho GTPase activating protein 29b	NA	NA	NA	Rho GTPase activating protein 29	ZDB-GENE-031010-44	arhgap29b	2	2	2	1	2	2	22212	2	15459828	15529330
MAD_Dr_004_153483	ENSDART00000043920	3	1	ENSDART00000104558 ; Dr.76909 ; NM_001002181.1	0	1	29359	NA	NA	NA	ENSDARG00000090044	100004977	NA	NA	NA	NA	methylenetetrahydrofolate dehydrogenase (NADP+ dependent) 2, methenyltetrahydrofolate cyclohydrolase	ZDB-GENE-040704-20	mthfd2	2	2	2	1	2	2	22212	NA	NA	NA
MAD_Dr_004_162842	NM_001080082.1 ; Dr.76441	2	1	ENSDART00000088888 ; OTTDART00000037412	0	1	43557	NM_001080082.1	NM_001080082	zgc:158299	ENSDARG00000006601	790937	zgc:158299	Dr.76441	zgc:158299	zgc:158299	zgc:158299	ZDB-GENE-061215-31	zgc:158299	2	2	2	1	2	2	22212	11	25620325	25943098
MAD_Dr_004_103137	ENSDART00000098265	3	1	ENSDART00000098267 ; Dr.132331 ; NM_205674.1	0	1	10327	NA	NA	NA	ENSDARG00000027290	-	NA	NA	NA	NA	neuropilin 1b	ZDB-GENE-040611-1	nrp1b	2	2	2	1	2	2	22212	2	43619823	43683302
MAD_Dr_004_138721	OTTDART00000042611	0	-	-	0	1	138156	NA	NA	NA	ENSDARG00000098029	-	NA	NA	NA	NA	NA	NA	NA	2	2	2	1	2	2	22212	23	29407310	29431223
MAD_Dr_004_140294	ENSDART00000080503 ; ENSDART00000103548	1	0	XM_001335621.2	0	1	139900	NA	NA	NA	ENSDARG00000067992	100334591	NA	NA	NA	NA	NA	NA	NA	2	2	2	1	2	2	22212	1	9982409	9985625
MAD_Dr_004_149750	ENSDART00000105939	0	-	-	0	1	24107	NA	NA	NA	ENSDARG00000079762	-	NA	NA	NA	NA	si:dkey-253d23.4	ZDB-GENE-050208-730	si:dkey-253d23.4	2	2	2	1	2	2	22212	22	9841556	9848818
MAD_Dr_004_152169	NM_001080645.1 ; Dr.91786	2	0	ENSDART00000092049 ; XM_001341304.2	0	1	27411	NM_001080645.1	NM_001080645	zgc:158657	ENSDARG00000063162	791163	zgc:158657	Dr.91786	zgc:158657	zgc:158657	hypothetical LOC100001318; zgc:158657	ZDB-GENE-070112-1312	zgc:158657	2	2	2	1	2	2	22212	16	6396274	6406509
MAD_Dr_004_155684	OTTDART00000044505	0	-	-	0	1	3349	NA	NA	NA	ENSDARG00000062415	368485	NA	NA	NA	NA	NA	ZDB-GENE-030616-60	ctnnd2a	2	2	2	1	2	2	22212	24	21977063	22395695
MAD_Dr_004_158850	ENSDART00000076316 ; OTTDART00000028669 ; Dr.134601 ; ENSDART00000109020	0	1		0	1	38004	NA	NA	NA	ENSDARG00000054160	541354	NA	Dr.134601	zgc:113625	zgc:113625	GIMAP7 protein; zgc:113625	ZDB-GENE-050320-47	zgc:113625	2	2	2	1	2	2	22212	10	40865010	40897950
MAD_Dr_004_160218	ENSDART00000073711	1	1	ENSDART00000106497	0	1	39895	NA	NA	NA	ENSDARG00000076067	100331983	NA	NA	NA	NA	NA	NA	NA	2	2	2	1	2	2	22212	NA	NA	NA
MAD_Dr_004_167527	Dr.75309	0	-	-	0	1	50262	NA	NA	NA	ENSDARG00000059367	556677	NA	Dr.75309	mfap2	microfibrillar-associated protein 2	microfibrillar-associated protein 2	ZDB-GENE-030131-6710	mfap2	2	2	2	1	2	2	22212	22	71558	75573
MAD_Dr_004_168005	NM_001109707.1 ; Dr.77832	1	0	ENSDART00000021559	0	1	5097	NM_001109707.1	NM_001109707	coro1b	ENSDARG00000008660	560168	coronin, actin binding protein, 1B	Dr.77832	coro1b	coronin, actin binding protein, 1B	coronin, actin binding protein, 1B	ZDB-GENE-040123-3	coro1b	2	2	2	1	2	2	22212	7	18365720	18403802
MAD_Dr_004_177690	NM_001080702.1	0	-	-	0	1	65746	NM_001080702.1	NM_001080702	zgc:158643	ENSDARG00000013669	791220	zgc:158643	NA	NA	NA	hypothetical LOC791532; zgc:158643; zgc:112161	ZDB-GENE-070112-2132	napbb	2	2	2	1	2	2	22212	17	4137247	4160303
MAD_Dr_004_182170	OTTDART00000005689	2	0	Dr.76772 ; ENSDART00000103255	0	1	73391	NA	NA	NA	ENSDARG00000055436	568756	NA	NA	NA	NA	finTRIM family, member 78	ZDB-GENE-041001-120	ftr78	2	2	2	1	2	2	22212	20	27021944	27038363
MAD_Dr_004_185236	OTTDART00000035275	1	1	XM_001340566.2	0	1	78136	NA	NA	NA	ENSDARG00000068124	-	NA	NA	NA	NA	NA	ZDB-GENE-081105-91	si:ch211-37p17.5	2	2	2	1	2	2	22212	8	49489257	49506828
MAD_Dr_004_187472	OTTDART00000031450	1	1	OTTDART00000031449	0	1	81360	NA	NA	NA	ENSDARG00000078644	561308	NA	NA	NA	NA	NA	ZDB-GENE-070912-59	theg	2	2	2	1	2	2	22212	2	52529901	52546934
MAD_Dr_004_192382	OTTDART00000040755	0	-	-	0	1	91893	NA	NA	NA	ENSDARG00000078285	8388607	NA	NA	NA	NA	NA	ZDB-GENE-090313-250	pik3ap1	2	2	2	1	2	2	22212	13	22963293	22998528
MAD_Dr_004_197788	ENSDART00000060663	0	-	-	0	1	98091	NA	NA	NA	ENSDARG00000041378	-	NA	NA	NA	NA	zgc:56186	NA	NA	2	2	2	1	2	2	22212	10	6988331	7020220
MAD_Dr_004_501841	ENSDART00000082044	25	0	gi|502384 ; gi|501841 ; gi|142029 ; gi|114460 ; gi|502383 ; gi|502382 ; gi|168722 ; gi|159250 ; gi|158967 ; gi|158300 ; gi|158195 ; gi|157658 ; gi|142027 ; gi|142026 ; gi|131416 ; gi|501842 ; gi|160066 ; gi|188389 ; gi|187730 ; gi|186100 ; gi|186098 ; gi|108803 ; gi|194828 ; gi|114031 ; gi|108872	1	1	-2	NA	NA	NA	ENSDARG00000076358	-	NA	NA	NA	NA	NA	ZDB-GENE-140106-121	zmp:0000001161	2	2	2	1	2	2	22212	22	5821276	5827364
MAD_Dr_004_502280	ENSDART00000103911	3	1	gi|502280 ; gi|152524 ; gi|152518	1	1	-2	NA	NA	NA	ENSDARG00000079145	100007503	NA	NA	NA	NA	hypothetical protein LOC100007503	NA	NA	2	2	2	1	2	2	22212	22	8286253	8295853
MAD_Dr_004_136851	NM_001007417.1 ; Dr.82860	2	0	ENSDART00000006256 ; OTTDART00000027658	0	1	13641	NM_001007417.1	NM_001007417	zgc:101559	ENSDARG00000003257	492776	zgc:101559	Dr.82860	zgc:101559	zgc:101559	zgc:101559	ZDB-GENE-041114-122	zgc:101559	2	2	2	1	2	2	22212	9	17421458	17426445
MAD_Dr_004_156850	OTTDART00000038537 ; NM_001098185.1 ; Dr.84123 ; ENSDART00000056850	0	1		0	1	35121	NM_001098185.1	NM_001098185	zgc:163077	ENSDARG00000079539	567932	zgc:163077	Dr.84123	zgc:163077	zgc:163077	zgc:163077	ZDB-GENE-070521-6	zgc:163077	2	2	2	1	2	2	22212	NA	NA	NA
MAD_Dr_004_171339	ENSDART00000066980	0	-	-	0	1	56081	NA	NA	NA	ENSDARG00000008439	100034473	NA	NA	NA	NA	ataxin 10	ZDB-GENE-060503-180	atxn10	2	2	2	1	2	2	22212	4	18731702	18753916
MAD_Dr_004_179472	NM_001123308.2	1	1	OTTDART00000035973	0	1	68542	NM_001123308.2	NM_001123308	ogg1	ENSDARG00000060002	791194	8-oxoguanine DNA glycosylase	NA	NA	NA	zgc:158858	ZDB-GENE-070112-932	ogg1	2	2	2	1	2	2	22212	8	46378722	46398503
MAD_Dr_004_151300	OTTDART00000028349	0	-	-	0	1	26219	NA	NA	NA	ENSDARG00000017047	550432	NA	NA	NA	NA	NA	ZDB-GENE-050417-248	slc27a4	2	2	2	1	2	2	22212	10	10780642	10824572
MAD_Dr_004_503672	OTTDART00000010537	3	1	gi|503672 ; gi|166078 ; gi|149750	1	1	-2	NA	NA	NA	ENSDARG00000095643	8388607	NA	NA	NA	NA	NA	ZDB-GENE-050208-330	si:dkey-253d23.3	2	2	2	1	2	2	22212	22	9832372	9839025
MAD_Dr_004_103479	NM_213528.2 ; Dr.80528	0	1		0	1	10361	NM_213528.2	NM_213528	trim36	ENSDARG00000062794	406849	tripartite motif-containing 36	Dr.80528	trim36	tripartite motif-containing 36	tripartite motif-containing 36	ZDB-GENE-040426-2936	trim36	2	2	2	1	1	2	22211	8	389149	410770
MAD_Dr_004_166128	NM_205588.2 ; Dr.531	1	1	OTTDART00000042823	0	1	48261	NM_205588.2	NM_205588	dcps	ENSDARG00000009862	402850	mRNA decapping enzyme	Dr.531	dcps	mRNA decapping enzyme	mRNA decapping enzyme	ZDB-GENE-040311-1	dcps	2	2	2	1	1	2	22211	10	39362498	39373238
MAD_Dr_004_190816	OTTDART00000027503	1	1	OTTDART00000027502	0	1	89754	NA	NA	NA	ENSDARG00000017985	393870	NA	NA	NA	NA	NA	ZDB-GENE-040426-1862	zgc:77739	2	2	2	1	1	2	22211	1	11707405	11711086
MAD_Dr_004_160792	OTTDART00000025989	0	-	-	0	1	40656	NA	NA	NA	ENSDARG00000028259	323653	NA	NA	NA	NA	NA	ZDB-GENE-040718-74	aldh3a2a	2	2	2	1	1	2	22211	15	20894936	20904031
MAD_Dr_004_130991	ENSDART00000061274	3	0	Dr.32370 ; ENSDART00000060051 ; OTTDART00000026031	0	1	130713	NA	NA	NA	ENSDARG00000041811	393788	NA	NA	NA	NA	ribosomal protein S25	ZDB-GENE-040426-1788	rps25	2	2	2	1	1	2	22211	10	39182357	39187699
MAD_Dr_004_164903	OTTDART00000044881	1	1	XR_029782.2	0	1	464	NA	NA	NA	ENSDARG00000058801	569100	NA	NA	NA	NA	NA	ZDB-GENE-050302-55	rev3l	2	2	2	1	1	2	22211	20	3328741	3385379
MAD_Dr_004_141359	ENSDART00000055047	1	1	OTTDART00000027218	0	1	140888	NA	NA	NA	ENSDARG00000037777	550323	NA	NA	NA	NA	NA	ZDB-GENE-050417-102	stk16	2	2	2	1	1	2	22211	1	4724634	4736456
MAD_Dr_004_145820	NM_200032.1 ; Dr.17271	2	1	ENSDART00000078494 ; OTTDART00000025748	0	1	18788	NM_200032.1	NM_200032	l3mbtl2	ENSDARG00000056079	568473	l(3)mbt-like 2 (Drosophila)	Dr.17271	l3mbtl2	l(3)mbt-like 2 (Drosophila)	l(3)mbt-like 2 (Drosophila)	ZDB-GENE-030131-8713	l3mbtl2	2	2	2	1	1	2	22211	12	18848857	18866622
MAD_Dr_004_142234	ENSDART00000109624 ; ENSDART00000108580 ; XM_701572.2	1	0	Dr.132592	0	1	141700	XM_701572.2	XM_701572	NA	ENSDARG00000091686	-	NA	NA	NA	NA	NA	ZDB-GENE-120709-3	si:dkey-16p19.1	2	2	2	1	1	2	22211	4	40540655	40546827
MAD_Dr_004_142318	OTTDART00000025074	1	0	NM_001025455.1	0	1	14225	NA	NA	NA	ENSDARG00000039456	324090	NA	NA	NA	NA	acyl-Coenzyme A binding domain containing 6	ZDB-GENE-030131-2810	acbd6	2	2	2	1	1	2	22211	8	14343567	14404107
MAD_Dr_004_143829	OTTDART00000025203	0	-	-	0	1	16216	NA	NA	NA	ENSDARG00000071018	794088	NA	NA	NA	NA	NA	ZDB-GENE-030131-3776	ptena	2	2	2	1	1	2	22211	17	23630545	23654524
MAD_Dr_004_146649	OTTDART00000036898	1	1	XM_001923431.1	0	1	19819	NA	NA	NA	ENSDARG00000051915	553270	NA	NA	NA	NA	NA	ZDB-GENE-060824-4	pde5ab	2	2	2	1	1	2	22211	7	57236443	57319385
MAD_Dr_004_148820	ENSDART00000042277 ; NM_001013451.2 ; Dr.77319	2	1	OTTDART00000036692 ; OTTDART00000013231	0	1	22890	NM_001013451.2	NM_001013451	mapk7	ENSDARG00000023110	541323	mitogen-activated protein kinase 7	Dr.77319	mapk7	mitogen-activated protein kinase 7	mitogen-activated protein kinase 7	ZDB-GENE-050320-10	mapk7	2	2	2	1	1	2	22211	12	4183588	4202062
MAD_Dr_004_150018	NM_001002352.1	3	1	OTTDART00000028709 ; ENSDART00000058459 ; Dr.81507	0	1	24459	NM_001002352.1	NM_001002352	rspo1	ENSDARG00000039957	436625	R-spondin homolog (Xenopus laevis)	NA	NA	NA	R-spondin homolog (Xenopus laevis)	ZDB-GENE-040718-44	rspo1	2	2	2	1	1	2	22211	NA	NA	NA
MAD_Dr_004_181920	ENSDART00000026178	1	1	NM_200823.1	0	1	72975	NA	NA	NA	ENSDARG00000005462	393796	NA	NA	NA	NA	zgc:66125	ZDB-GENE-040426-1545	kif4	2	2	2	1	1	2	22211	21	44713348	44748492
MAD_Dr_004_151429	OTTDART00000019941 ; ENSDART00000103484 ; NM_001045098.1 ; Dr.114600	0	1		0	1	26381	NM_001045098.1	NM_001045098	si:ch211-203h15.1	ENSDARG00000045880	566151	si:ch211-203h15.1	Dr.114600	si:ch211-203h15.1	si:ch211-203h15.1	si:ch211-203h15.1	ZDB-GENE-030131-2560	gas2l3	2	2	2	1	1	2	22211	4	1839999	1871335
MAD_Dr_004_152016	ENSDART00000043823	2	1	Dr.118618 ; XM_001343722.2	0	1	27150	NA	NA	NA	ENSDARG00000040027	-	NA	NA	NA	NA	NA	ZDB-GENE-081002-4	osbpl10	2	2	2	1	1	2	22211	16	39321148	39432578
MAD_Dr_004_154177	ENSDART00000032188	0	-	-	0	1	30599	NA	NA	NA	ENSDARG00000021849	337520	NA	NA	NA	NA	wu:fj80h11	ZDB-GENE-030131-9466	si:dkey-256h2.1	2	2	2	1	1	2	22211	16	47428510	47446580
MAD_Dr_004_156299	XM_001332657.2	1	0	Dr.360	0	1	34329	XM_001332657.2	XM_001332657	NA	ENSDARG00000079444	-	NA	NA	NA	NA	NA	NA	NA	2	2	2	1	1	2	22211	NA	NA	NA
MAD_Dr_004_157117	XM_001337079.2 ; XM_001923265.1	15	0	XM_001923718.1 ; XM_001919958.1 ; Dr.151010 ; XM_001922624.1 ; XM_001334130.1 ; XM_001333085.2 ; Dr.19874 ; XM_001342838.2 ; XM_001922798.1 ; NM_001114712.1 ; XM_001923946.1 ; XM_001923949.1 ; Dr.130939 ; NM_001111183.1 ; XM_001923908.1	0	1	35474	XM_001337079.2	XM_001337079	NA	ENSDARG00000090220	-	NA	NA	NA	NA	NA	NA	NA	2	2	2	1	1	2	22211	4	32764185	32865433
MAD_Dr_004_157813	NM_001077288.1	0	-	-	0	1	36469	NM_001077288.1	NM_001077288	zgc:152938	ENSDARG00000068975	768145	zgc:152938	NA	NA	NA	similar to zinc finger protein 568; zgc:152938	ZDB-GENE-061013-458	zgc:152938	2	2	2	1	1	2	22211	NA	NA	NA
MAD_Dr_004_158189	OTTDART00000008738	1	0	NM_001007407.1	0	1	37033	NA	NA	NA	ENSDARG00000057983	492766	NA	NA	NA	NA	SVOP-like	ZDB-GENE-041114-109	svopl	2	2	2	1	1	2	22211	4	9768134	9780216
MAD_Dr_004_159054	NM_001020581.1	0	-	-	0	1	38307	NM_001020581.1	NM_001020581	zgc:110270	ENSDARG00000010073	553605	zgc:110270	NA	NA	NA	zgc:110270	ZDB-GENE-050522-323	rab3ip	2	2	2	1	1	2	22211	NA	NA	NA
MAD_Dr_004_161156	ENSDART00000066367	1	1	OTTDART00000025764	0	1	41116	NA	NA	NA	ENSDARG00000045129	324381	NA	NA	NA	NA	FK506 binding protein 10	ZDB-GENE-030131-3101	fkbp10b	2	2	2	1	1	2	22211	12	13866983	13918734
MAD_Dr_004_166267	OTTDART00000030185	0	-	-	0	1	48466	NA	NA	NA	ENSDARG00000013082	393264	NA	NA	NA	NA	NA	ZDB-GENE-040426-1056	uap1l1	2	2	2	1	1	2	22211	5	31211509	31217242
MAD_Dr_004_172054	ENSDART00000102328	3	0	XM_001331564.2 ; Dr.24973 ; NM_201008.1	0	1	57247	NA	NA	NA	ENSDARG00000023840	393983	NA	NA	NA	NA	6-phosphofructo-2-kinase/fructose-2,6-biphosphatase 2	ZDB-GENE-040426-966	pfkfb2a	2	2	2	1	1	2	22211	23	42873096	42918060
MAD_Dr_004_172736	OTTDART00000039630	0	-	-	0	1	58268	NA	NA	NA	ENSDARG00000020982	777736	NA	NA	NA	NA	zgc:152958	ZDB-GENE-061110-112	prickle2a	2	2	2	1	1	2	22211	8	53674394	53697273
MAD_Dr_004_174829	OTTDART00000029016	2	0	Dr.12056 ; NM_200407.1	0	1	61333	NA	NA	NA	ENSDARG00000051936	393378	NA	NA	NA	NA	ERGIC and golgi 2	ZDB-GENE-040426-1331	ergic2	2	2	2	1	1	2	22211	25	20618522	20629333
MAD_Dr_004_175524	OTTDART00000021815	0	-	-	0	1	6244	NA	NA	NA	ENSDARG00000035360	8388607	NA	NA	NA	NA	NA	ZDB-GENE-060526-45	mink1	2	2	2	1	1	2	22211	5	37705420	37784602
MAD_Dr_004_176437	NM_001099227.1	1	1	ENSDART00000112820	0	1	63797	NM_001099227.1	NM_001099227	zgc:165515	ENSDARG00000078212	323052	zgc:165515	NA	NA	NA	zgc:165515	ZDB-GENE-030131-1772	zgc:165515	2	2	2	1	1	2	22211	4	72608312	72627706
MAD_Dr_004_176512	ENSDART00000076276	2	1	Dr.37703 ; XM_001341904.2	0	1	63904	NA	NA	NA	ENSDARG00000054128	100002065	NA	NA	NA	NA	im:7136021	ZDB-GENE-041008-74	im:7136021	2	2	2	1	1	2	22211	17	28590454	28595888
MAD_Dr_004_178828	NM_200660.1 ; Dr.79827	1	0	OTTDART00000025026	0	1	67579	NM_200660.1	NM_200660	crsp8	ENSDARG00000009681	393633	cofactor required for Sp1 transcriptional activati	Dr.79827	crsp8	cofactor required for Sp1 transcriptional activati	cofactor required for Sp1 transcriptional activation, subunit 8	ZDB-GENE-040426-1601	med27	2	2	2	1	1	2	22211	8	11846966	11950360
MAD_Dr_004_181173	OTTDART00000018574 ; ENSDART00000080888	5	0	ENSDART00000036243 ; Dr.117433 ; XM_001334028.1 ; Dr.84729 ; NM_001007412.1	0	1	71505	NA	NA	NA	ENSDARG00000058076	492771	NA	NA	NA	NA	NA	ZDB-GENE-041114-117	snf8	2	2	2	1	1	2	22211	12	20531083	20536411
MAD_Dr_004_181389	OTTDART00000017511	0	-	-	0	1	72012	NA	NA	NA	ENSDARG00000036109	286740	NA	NA	NA	NA	NA	ZDB-GENE-021210-1	mtx1b	2	2	2	1	1	2	22211	19	24864361	24900535
MAD_Dr_004_181633	ENSDART00000057983	0	-	-	0	1	72375	NA	NA	NA	ENSDARG00000039667	100334022	NA	NA	NA	NA	mitochondrial ribosomal protein L38	ZDB-GENE-040426-2373	mrpl38	2	2	2	1	1	2	22211	12	44867469	44886420
MAD_Dr_004_198722	ENSDART00000054814	2	1	Dr.80099 ; NM_200883.1	0	1	9905	NA	NA	NA	ENSDARG00000037634	393857	NA	NA	NA	NA	glucosamine (UDP-N-acetyl)-2-epimerase/N-acetylmannosamine kinase	ZDB-GENE-040426-1848	gne	2	2	2	1	1	2	22211	NA	NA	NA
MAD_Dr_004_103527	OTTDART00000032485 ; OTTDART00000032486	2	1	ENSDART00000089943 ; OTTDART00000032483	0	1	103654	NA	NA	NA	ENSDARG00000039682	564515	NA	NA	NA	NA	NA	ZDB-GENE-070705-21	si:ch211-121a2.2	2	2	2	1	1	2	22211	20	7080755	7090591
MAD_Dr_004_131913	OTTDART00000045846	3	1	Dr.151750 ; XM_695639.3 ; ENSDART00000093021	0	1	131558	NA	NA	NA	ENSDARG00000063580	-	NA	NA	NA	NA	NA	ZDB-GENE-091204-412	si:ch1073-219n12.1	2	2	2	1	1	2	22211	9	3049547	3119000
MAD_Dr_004_146348	ENSDART00000112567	0	-	-	0	1	19444	NA	NA	NA	ENSDARG00000053205	100005543	NA	NA	NA	NA	zgc:165463	ZDB-GENE-070720-14	ppfia4	2	2	2	1	1	2	22211	11	22214185	22421867
MAD_Dr_004_148837	XM_695526.3 ; ENSDART00000113414	0	1		0	1	22911	XM_695526.3	XM_695526	NA	ENSDARG00000075806	-	NA	NA	NA	NA	NA	ZDB-GENE-091117-44	kirrel3a	2	2	2	1	1	2	22211	10	39555113	39918050
MAD_Dr_004_501720	ENSDART00000077161	4	1	gi|504471 ; gi|501720 ; gi|180327 ; gi|180255	1	1	-2	NA	NA	NA	ENSDARG00000068640	-	NA	NA	NA	NA	si:dkey-21n12.1	NA	NA	2	2	2	1	1	2	22211	10	36667340	36690215
MAD_Dr_004_168322	ENSDART00000038032	0	-	-	0	1	51417	NA	NA	NA	ENSDARG00000027070	406368	NA	NA	NA	NA	zgc:85611	ZDB-GENE-040426-2074	acbd4	2	2	2	1	1	2	22211	12	15526454	15577783
MAD_Dr_004_501261	ENSDART00000041707	2	1	gi|501261 ; gi|184874	1	1	-2	NA	NA	NA	ENSDARG00000034453	566824	NA	NA	NA	NA	similar to Unc119b	NA	NA	2	2	2	1	1	2	22211	15	28173622	28192348
MAD_Dr_004_175010	OTTDART00000043668	2	1	Dr.82054 ; XM_684617.3	0	1	61608	NA	NA	NA	ENSDARG00000087983	-	NA	NA	NA	NA	NA	ZDB-GENE-091204-182	igsf5a	2	2	2	1	1	2	22211	10	39087368	39108857
MAD_Dr_004_142615	NM_199879.1 ; Dr.20491	0	1		0	1	14634	NM_199879.1	NM_199879	mgrn1	ENSDARG00000018347	793939	mahogunin, ring finger 1	Dr.20491	mgrn1	mahogunin, ring finger 1	mahogunin, ring finger 1	ZDB-GENE-030131-6192	mgrn1a	2	2	2	1	1	2	22211	NA	NA	NA
MAD_Dr_004_173764	Dr.82419 ; NM_200354.1 ; ENSDART00000076464	1	1	OTTDART00000021759	0	1	59759	NM_200354.1	NM_200354	zgc:63972	ENSDARG00000054288	572862	zgc:63972	Dr.82419	zgc:63972	zgc:63972	zgc:63972	ZDB-GENE-040426-1320	zgc:63972	2	2	1	3	4	4	22134	5	33340062	33359715
MAD_Dr_004_143658	OTTDART00000008408	0	-	-	0	1	15990	NA	NA	NA	ENSDARG00000008235	567886	NA	NA	NA	NA	NA	ZDB-GENE-041210-47	cog5	2	2	1	3	3	3	22133	4	2618672	2707599
MAD_Dr_004_196058	OTTDART00000023443	0	-	-	0	1	96336	NA	NA	NA	ENSDARG00000076008	-	NA	NA	NA	NA	NA	ZDB-GENE-070705-289	si:dkey-119m17.2	2	2	1	3	3	3	22133	19	25850927	25880068
MAD_Dr_004_142229	ENSDART00000105485	4	0	Dr.78872 ; OTTDART00000017480 ; XM_001345690.2 ; ENSDART00000105317	0	1	141697	NA	NA	NA	ENSDARG00000071378	558738	NA	NA	NA	NA	hypothetical LOC100007213; si:dkey-78l4.14	ZDB-GENE-050309-178	si:dkey-78l4.14	2	2	1	3	2	3	22132	22	19522498	19527825
MAD_Dr_004_108092	OTTDART00000030678 ; ENSDART00000062749	0	1		0	1	108329	NA	NA	NA	ENSDARG00000042753	567046	NA	NA	NA	NA	cathepsin K, like	ZDB-GENE-050208-336	ctskl	2	2	1	3	2	3	22132	22	16380654	16392790
MAD_Dr_004_114376	OTTDART00000043714	1	1	ENSDART00000109816	0	1	114787	NA	NA	NA	ENSDARG00000077962	-	NA	NA	NA	NA	NA	ZDB-GENE-091118-80	gltpb	2	2	1	3	2	3	22132	10	40399881	40408794
MAD_Dr_004_197695	OTTDART00000033642	1	1	OTTDART00000033644	0	1	98001	NA	NA	NA	ENSDARG00000095504	8388607	NA	NA	NA	NA	NA	ZDB-GENE-070912-145	si:ch211-167j6.3	2	2	1	3	2	3	22132	9	12914543	12916954
MAD_Dr_004_183559	NM_001098744.2	1	1	OTTDART00000045769	0	1	75591	NM_001098744.2	NM_001098744	NA	ENSDARG00000071679	566052	NA	NA	NA	NA	similar to lymphocyte antigen 6 complex, locus E ligand; zgc:92871	NA	NA	2	2	1	3	2	3	22132	22	4750818	4761094
MAD_Dr_004_166136	OTTDART00000023548	9	1	ENSDART00000113675 ; ENSDART00000112203 ; ENSDART00000110048 ; ENSDART00000081545 ; Dr.75222 ; XM_001918894.1 ; Dr.150345 ; NM_213521.1 ; OTTDART00000018541	0	1	48270	NA	NA	NA	ENSDARG00000075460	568805	NA	NA	NA	NA	hypothetical protein LOC100149458; family with sequence similarity 40, member A	ZDB-GENE-040426-2927	strip1	2	2	1	3	2	3	22132	NA	NA	NA
MAD_Dr_004_150254	NM_001018678.1	1	1	ENSDART00000074176	0	1	24790	NM_001018678.1	NM_001018678	spata18	ENSDARG00000052343	497395	spermatogenesis associated 18	NA	NA	NA	spermatogenesis associated 18	ZDB-GENE-050522-306	spata18	2	2	1	3	2	3	22132	20	23261412	23272330
MAD_Dr_004_503128	NM_001002406.1	3	1	gi|503128 ; gi|156879 ; gi|141029	1	1	-2	NM_001002406.1	NM_001002406	nr4a2b	ENSDARG00000044532	436679	nuclear receptor subfamily 4, group A, member 2b	NA	NA	NA	nuclear receptor subfamily 4, group A, member 2b; nuclear receptor subfamily 4, group A, member 2a	ZDB-GENE-040718-103	nr4a2b	2	2	1	3	2	3	22132	6	12227221	12231692
MAD_Dr_004_500791	Dr.77456	4	0	gi|503450 ; gi|500791 ; gi|163327 ; gi|157435	1	1	-2	NA	NA	NA	ENSDARG00000010445	322581	NA	Dr.77456	trabd	TraB domain containing	TraB domain containing	ZDB-GENE-030131-1301	trabd	2	2	1	3	2	3	22132	18	14917033	14932989
MAD_Dr_004_105407	XM_001343824.2 ; Dr.149190 ; ENSDART00000053460	0	1		0	1	105574	XM_001343824.2	XM_001343824	NA	ENSDARG00000068590	100004600	NA	Dr.149190	NA	NA	NA	NA	NA	2	2	1	3	1	3	22131	8	26352976	26357150
MAD_Dr_004_116312	ENSDART00000108962	2	1	NM_001033098.1 ; Dr.88501	0	1	116759	NA	NA	NA	ENSDARG00000073971	606662	NA	NA	NA	NA	zgc:110385	ZDB-GENE-050809-125	plgrkt	2	2	1	2	3	3	22123	NA	NA	NA
MAD_Dr_004_127476	Dr.150667	0	-	-	0	1	127501	NA	NA	NA	ENSDARG00000089291	-	NA	Dr.150667	NA	NA	NA	NA	NA	2	2	1	2	3	3	22123	3	57755414	57759499
MAD_Dr_004_130145	ENSDART00000026816	1	1	Dr.87003	0	1	129946	NA	NA	NA	ENSDARG00000018800	436985	NA	NA	NA	NA	zgc:92598	ZDB-GENE-040718-467	zgc:92598	2	2	1	2	3	3	22123	NA	NA	NA
MAD_Dr_004_152291	OTTDART00000020997	3	0	Dr.104263 ; NM_001007323.2 ; ENSDART00000051621	0	1	27563	NA	NA	NA	ENSDARG00000035608	492357	NA	NA	NA	NA	NA	ZDB-GENE-030131-683	pgam5	2	2	1	2	3	3	22123	5	18421575	18432443
MAD_Dr_004_158865	NM_212898.1 ; Dr.75863	1	0	ENSDART00000034705	0	1	38030	NM_212898.1	NM_212898	mettl11a	ENSDARG00000022399	405834	methyltransferase like 11A	Dr.75863	mettl11a	methyltransferase like 11A	zgc:77488	ZDB-GENE-040426-2055	ntmt1	2	2	1	2	3	3	22123	5	31898917	31905123
MAD_Dr_004_176702	ENSDART00000101143	2	1	NM_001089550.1 ; OTTDART00000030873	0	1	64188	NA	NA	NA	ENSDARG00000001470	565708	NA	NA	NA	NA	NA	ZDB-GENE-070705-176	mhc1zea	2	2	1	2	3	3	22123	1	46334486	46430897
MAD_Dr_004_162159	ENSDART00000007030	1	1	OTTDART00000009474	0	1	42606	NA	NA	NA	ENSDARG00000006011	567545	NA	NA	NA	NA	si:ch211-234f20.7	ZDB-GENE-041210-190	klhl42	2	2	1	2	3	3	22123	4	17645335	17653192
MAD_Dr_004_172228	ENSDART00000090942	0	-	-	0	1	57506	NA	NA	NA	ENSDARG00000062695	751690	NA	NA	NA	NA	coiled-coil domain containing 126	ZDB-GENE-060503-11	ccdc126	2	2	1	2	3	3	22123	19	20579503	20592679
MAD_Dr_004_172815	NM_001017777.1 ; Dr.118971	0	1		0	1	58421	NM_001017777.1	NM_001017777	bre	ENSDARG00000038863	550474	brain and reproductive organ-expressed protein	Dr.118971	bre	brain and reproductive organ-expressed protein	brain and reproductive organ-expressed protein	ZDB-GENE-050417-299	bre	2	2	1	2	3	3	22123	17	41126662	41309453
MAD_Dr_004_177840	OTTDART00000006741 ; ENSDART00000019059 ; NM_001025498.1 ; Dr.108111	0	1		0	1	65981	NM_001025498.1	NM_001025498	si:ch211-260g14.3	ENSDARG00000020354	558036	si:ch211-260g14.3	Dr.108111	si:ch211-260g14.3	si:ch211-260g14.3	si:ch211-260g14.3	ZDB-GENE-041014-332	lmx1a	2	2	1	2	3	3	22123	20	34018898	34037381
MAD_Dr_004_181639	OTTDART00000028017	3	0	ENSDART00000077744 ; NM_001002127.1 ; NM_001103133.1	0	1	72381	NA	NA	NA	ENSDARG00000069910	415217	NA	NA	NA	NA	NA	ZDB-GENE-040625-131	gtf2f2a	2	2	1	2	3	3	22123	1	33962805	33974335
MAD_Dr_004_182248	NM_214776.1 ; Dr.13478 ; OTTDART00000036247	0	1		0	1	73526	NM_214776.1	NM_214776	si:dkey-7a20.6	ENSDARG00000052624	407615	si:dkey-7a20.6	Dr.13478	si:dkey-7a20.6	si:dkey-7a20.6	si:dkey-7a20.6	ZDB-GENE-040426-2713	spryd7a	2	2	1	2	3	3	22123	1	46019415	46027121
MAD_Dr_004_182768	ENSDART00000063953	1	1	OTTDART00000028568	0	1	74241	NA	NA	NA	ENSDARG00000043562	794398	NA	NA	NA	NA	zgc:65997	ZDB-GENE-040426-1502	zgc:65997	2	2	1	2	3	3	22123	17	23529093	23532044
MAD_Dr_004_100178	ENSDART00000014103	1	1	Dr.82236	0	1	100229	NA	NA	NA	ENSDARG00000001804	550424	NA	NA	NA	NA	hypothetical LOC791786; zgc:112148	ZDB-GENE-050417-235	zgc:112148	2	2	1	2	2	2	22122	3	56793586	56803804
MAD_Dr_004_177745	ENSDART00000061996	1	1	OTTDART00000026931	0	1	65836	NA	NA	NA	ENSDARG00000042272	393358	NA	NA	NA	NA	transmembrane protein 231	ZDB-GENE-040426-1386	tmem231	2	2	1	2	2	2	22122	25	34340157	34355516
MAD_Dr_004_126877	ENSDART00000100605	1	1	Dr.133583	0	1	126945	NA	NA	NA	ENSDARG00000069241	100004012	NA	NA	NA	NA	si:dkeyp-50f7.3	ZDB-GENE-041014-158	ttc32	2	2	1	2	2	2	22122	20	43849445	43853693
MAD_Dr_004_101653	OTTDART00000033641	3	1	OTTDART00000033640 ; Dr.79069 ; XM_691721.3	0	1	101746	NA	NA	NA	ENSDARG00000041904	553307	NA	NA	NA	NA	ankyrin repeat and zinc finger domain containing 1	ZDB-GENE-050309-80	ankzf1	2	2	1	2	2	2	22122	9	12863211	12914063
MAD_Dr_004_197219	Dr.149345	0	-	-	0	1	97534	NA	NA	NA	ENSDARG00000028164	573769	NA	Dr.149345	NA	NA	similar to Cystatin-B (Stefin-B) (Liver thiol proteinase inhibitor) (CPI-B)	ZDB-GENE-040426-1065	cst14a	2	2	1	2	2	2	22122	24	20772332	20773993
MAD_Dr_004_196529	Dr.86194	2	0	ENSDART00000040723 ; OTTDART00000027990	0	1	96832	NA	NA	NA	ENSDARG00000030897	436802	NA	Dr.86194	psmg3	proteasome (prosome, macropain) assembly chaperone	proteasome (prosome, macropain) assembly chaperone 3	ZDB-GENE-040718-262	psmg3	2	2	1	2	2	2	22122	NA	NA	NA
MAD_Dr_004_108516	NM_001159983.1	1	1	Dr.118319	0	1	108780	NM_001159983.1	NM_001159983	NA	ENSDARG00000075528	563525	NA	NA	NA	NA	tripartite motif-containing 59	ZDB-GENE-081022-28	lyrm9	2	2	1	2	2	2	22122	15	30430102	30431212
MAD_Dr_004_104628	ENSDART00000036456	1	1	OTTDART00000028151	0	1	104775	NA	NA	NA	ENSDARG00000044562	415158	NA	NA	NA	NA	zgc:86706	ZDB-GENE-040625-38	cycsb	2	2	1	2	2	2	22122	6	10675162	10676997
MAD_Dr_004_111095	OTTDART00000037125	1	0	NM_001020605.1	0	1	111401	NA	NA	NA	ENSDARG00000053685	798997	NA	NA	NA	NA	zgc:110584	ZDB-GENE-050522-513	gtf2a2	2	2	1	2	2	2	22122	7	29080350	29084934
MAD_Dr_004_147454	OTTDART00000032976	2	1	XM_704110.3 ; Dr.32485	0	1	20943	NA	NA	NA	ENSDARG00000092158	567497	NA	NA	NA	NA	chromobox homolog 3b	ZDB-GENE-070628-2	cbx3b	2	2	1	2	2	2	22122	16	21232701	21242053
MAD_Dr_004_110660	OTTDART00000040636	0	-	-	0	1	110944	NA	NA	NA	ENSDARG00000092895	8388607	NA	NA	NA	NA	NA	ZDB-GENE-090313-209	si:dkey-188i13.11	2	2	1	2	2	2	22122	13	37524783	37530800
MAD_Dr_004_183246	OTTDART00000029636	0	-	-	0	1	75116	NA	NA	NA	ENSDARG00000022832	568155	NA	NA	NA	NA	NA	ZDB-GENE-051113-212	bnip4	2	2	1	2	2	2	22122	17	20211965	20216473
MAD_Dr_004_112290	Dr.132213	1	1	NM_001002553.1	0	1	112605	NA	NA	NA	ENSDARG00000037835	436826	NA	Dr.132213	polr3k	polymerase (RNA) III (DNA directed) polypeptide K	polymerase (RNA) III (DNA directed) polypeptide K	ZDB-GENE-040718-291	polr3k	2	2	1	2	2	2	22122	3	48427752	48431813
MAD_Dr_004_113459	OTTDART00000043132	2	1	ENSDART00000066154 ; Dr.19071	0	1	113880	NA	NA	NA	ENSDARG00000086416	8388607	NA	NA	NA	NA	NA	ZDB-GENE-091207-2	med11	2	2	1	2	2	2	22122	10	22942799	22946644
MAD_Dr_004_114308	ENSDART00000111580	1	1	ENSDART00000113960	0	1	114722	NA	NA	NA	ENSDARG00000076393	100005403	NA	NA	NA	NA	zgc:194294	ZDB-GENE-081022-99	tmem65	2	2	1	2	2	2	22122	19	177065	187781
MAD_Dr_004_114670	NM_001130775.1	0	-	-	0	1	115119	NM_001130775.1	NM_001130775	si:dkey-202c5.1	ENSDARG00000069014	560234	si:dkey-202c5.1	NA	NA	NA	similar to nephroretinin; si:dkey-202c5.1	ZDB-GENE-060503-715	nphp4	2	2	1	2	2	2	22122	8	21956658	22253010
MAD_Dr_004_170749	OTTDART00000035193 ; OTTDART00000035192	0	1		0	1	55146	NA	NA	NA	ENSDARG00000062423	767707	NA	NA	NA	NA	zgc:153901	ZDB-GENE-060929-820	zgc:153901	2	2	1	2	2	2	22122	9	24397664	24402015
MAD_Dr_004_118274	Dr.117027	2	1	OTTDART00000029127 ; NM_201004.1	0	1	118848	NA	NA	NA	ENSDARG00000033175	393979	NA	Dr.117027	snrpe	small nuclear ribonucleoprotein polypeptide E	small nuclear ribonucleoprotein polypeptide E	ZDB-GENE-040426-1112	snrpe	2	2	1	2	2	2	22122	11	37453347	37458996
MAD_Dr_004_127541	OTTDART00000017886	0	-	-	0	1	127560	NA	NA	NA	ENSDARG00000056583	447913	NA	NA	NA	NA	NADH dehydrogenase (ubiquinone) Fe-S protein 6	ZDB-GENE-040912-86	ndufs6	2	2	1	2	2	2	22122	19	28696978	28699654
MAD_Dr_004_165475	OTTDART00000027284	0	-	-	0	1	47316	NA	NA	NA	ENSDARG00000027992	393455	NA	NA	NA	NA	NA	ZDB-GENE-040426-1239	hao2	2	2	1	2	2	2	22122	9	21335993	21353748
MAD_Dr_004_120991	OTTDART00000023561	1	1	OTTDART00000023559	0	1	121406	NA	NA	NA	ENSDARG00000076965	8388607	NA	NA	NA	NA	NA	ZDB-GENE-070705-311	cep70	2	2	1	2	2	2	22122	22	12579525	12601328
MAD_Dr_004_122307	ENSDART00000082847	1	1	NM_001077605.1	0	1	122789	NA	NA	NA	ENSDARG00000059536	559300	NA	NA	NA	NA	zgc:153381	ZDB-GENE-061027-351	fam78aa	2	2	1	2	2	2	22122	NA	NA	NA
MAD_Dr_004_124729	Dr.92970	1	1	ENSDART00000064513	0	1	125203	NA	NA	NA	ENSDARG00000043934	553970	NA	Dr.92970	il17a/f2	interleukin 17a/f2	interleukin 17a/f2	ZDB-GENE-061031-2	il17a/f2	2	2	1	2	2	2	22122	17	12575959	12579792
MAD_Dr_004_154122	OTTDART00000037142	0	-	-	0	1	30535	NA	NA	NA	ENSDARG00000018856	558997	NA	NA	NA	NA	NA	ZDB-GENE-061013-124	dclk1a	2	2	1	2	2	2	22122	10	34793459	34927877
MAD_Dr_004_143687	OTTDART00000017059	2	1	Dr.155204 ; XM_001341087.2	0	1	16018	NA	NA	NA	ENSDARG00000034062	561219	NA	NA	NA	NA	NA	ZDB-GENE-060503-587	tax1bp1a	2	2	1	2	2	2	22122	NA	NA	NA
MAD_Dr_004_126621	NM_001004610.1	2	0	Dr.85984 ; ENSDART00000065336	0	1	126676	NM_001004610.1	NM_001004610	zgc:103519	ENSDARG00000079272	447871	zgc:103519	NA	NA	NA	zgc:103519	ZDB-GENE-040912-34	tmem14cb	2	2	1	2	2	2	22122	24	36240790	36248321
MAD_Dr_004_131009	ENSDART00000027009	3	0	OTTDART00000044207 ; Dr.79806 ; NM_001025475.1	0	1	13073	NA	NA	NA	ENSDARG00000019976	553513	NA	NA	NA	NA	isopentenyl-diphosphate delta isomerase 1	ZDB-GENE-050913-44	idi1	2	2	1	2	2	2	22122	24	3437586	3445316
MAD_Dr_004_128964	OTTDART00000022503	2	1	ENSDART00000035235 ; NM_001013272.2	0	1	128890	NA	NA	NA	ENSDARG00000093313	550134	NA	NA	NA	NA	similar to Os05g0242100; zgc:172187; similar to polytene protein; zgc:153686	ZDB-GENE-050411-10	ubb	2	2	1	2	2	2	22122	5	41492074	41496178
MAD_Dr_004_130509	ENSDART00000092809	1	1	NM_001110454.1	0	1	13028	NA	NA	NA	ENSDARG00000063475	556979	NA	NA	NA	NA	zgc:162197	ZDB-GENE-070424-84	abcg1	2	2	1	2	2	2	22122	15	5037461	5083836
MAD_Dr_004_132564	OTTDART00000044992	2	1	OTTDART00000044991 ; OTTDART00000044990	0	1	132160	NA	NA	NA	ENSDARG00000091983	-	NA	NA	NA	NA	NA	ZDB-GENE-091204-291	si:ch73-249k16.1	2	2	1	2	2	2	22122	NA	NA	NA
MAD_Dr_004_165853	NM_001164368.1 ; Dr.67645	0	1		0	1	47861	NM_001164368.1	NM_001164368	wu:fb12c06	ENSDARG00000087093	561592	wu:fb12c06	Dr.67645	wu:fb52f02	wu:fb52f02	wu:fb12c06	ZDB-GENE-030131-8454	si:ch211-157c3.4	2	2	1	2	2	2	22122	3	27511544	27517003
MAD_Dr_004_131856	OTTDART00000010527	3	0	ENSDART00000005869 ; Dr.151025 ; NM_001020692.1	0	1	131507	NA	NA	NA	ENSDARG00000011152	553721	NA	NA	NA	NA	NA	ZDB-GENE-050522-182	rpp14	2	2	1	2	2	2	22122	22	10128820	10134851
MAD_Dr_004_133840	OTTDART00000024536	6	0	ENSDART00000078615 ; ENSDART00000002177 ; OTTDART00000024535 ; OTTDART00000024534 ; Dr.77477 ; NM_131507.1	0	1	133407	NA	NA	NA	ENSDARG00000006786	57969	NA	NA	NA	NA	zeta2-cop	ZDB-GENE-000406-5	copz2	2	2	1	2	2	2	22122	3	23964033	23980864
MAD_Dr_004_501644	ENSDART00000074150	3	1	gi|501644 ; gi|165079 ; gi|134404	1	1	-2	NA	NA	NA	ENSDARG00000044417	619201	NA	NA	NA	NA	dispatched homolog 1 (Drosophila)	ZDB-GENE-030911-7	disp1	2	2	1	2	2	2	22122	20	51676029	51829201
MAD_Dr_004_134516	ENSDART00000087894	1	1	Dr.91965	0	1	134098	NA	NA	NA	ENSDARG00000061547	100334740	NA	NA	NA	NA	NA	ZDB-GENE-060929-224	zgc:153409	2	2	1	2	2	2	22122	5	26829719	26830094
MAD_Dr_004_500715	Dr.28547	4	1	gi|503465 ; gi|500715 ; gi|163278 ; gi|159407	1	1	-2	NA	NA	NA	ENSDARG00000017571	405863	NA	Dr.28547	mccc2	methylcrotonoyl-Coenzyme A carboxylase 2 (beta)	methylcrotonoyl-Coenzyme A carboxylase 2 (beta)	ZDB-GENE-040426-2493	mccc2	2	2	1	2	2	2	22122	5	43208685	43219510
MAD_Dr_004_171708	NM_199698.1	1	0	ENSDART00000082165	0	1	56690	NM_199698.1	NM_199698	sec22a	ENSDARG00000078328	324832	SEC22 vesicle trafficking protein homolog A (S. ce	NA	NA	NA	SEC22 vesicle trafficking protein homolog A (S. cerevisiae)	ZDB-GENE-030131-3553	sec22a	2	2	1	2	2	2	22122	9	38040629	38050698
MAD_Dr_004_140613	OTTDART00000028101	2	0	ENSDART00000113143 ; Dr.140507	0	1	140196	NA	NA	NA	ENSDARG00000078085	447922	NA	NA	NA	NA	zgc:103688	ZDB-GENE-040912-105	snrpg	2	2	1	2	2	2	22122	NA	NA	NA
MAD_Dr_004_142072	ENSDART00000103390 ; ENSDART00000114321	1	1	XM_001342976.2	0	1	141550	NA	NA	NA	ENSDARG00000070446	-	NA	NA	NA	NA	NA	NA	NA	2	2	1	2	2	2	22122	NA	NA	NA
MAD_Dr_004_143043	Dr.118997	0	-	-	0	1	15176	NA	NA	NA	ENSDARG00000053165	568840	NA	Dr.118997	zgc:113377	zgc:113377	zgc:113377	ZDB-GENE-050913-148	zgc:113377	2	2	1	2	2	2	22122	17	50399386	50411406
MAD_Dr_004_145284	ENSDART00000003712	0	-	-	0	1	18109	NA	NA	NA	ENSDARG00000016918	492331	NA	NA	NA	NA	angiotensin I converting enzyme (peptidyl-dipeptid	ZDB-GENE-041114-6	ace2	2	2	1	2	2	2	22122	11	29734494	29749173
MAD_Dr_004_146584	OTTDART00000025477 ; ENSDART00000061593	3	1	OTTDART00000025476 ; OTTDART00000025478 ; Dr.75085	0	1	19744	NA	NA	NA	ENSDARG00000042032	30386	NA	NA	NA	NA	POU domain gene 12	ZDB-GENE-980526-220	pou3f3a	2	2	1	2	2	2	22122	9	6680609	6683681
MAD_Dr_004_147212	OTTDART00000037112	0	-	-	0	1	20607	NA	NA	NA	ENSDARG00000010601	555239	NA	NA	NA	NA	NA	ZDB-GENE-061103-52	mtmr10	2	2	1	2	2	2	22122	7	30454323	30497395
MAD_Dr_004_147311	Dr.32485 ; XM_704110.3	1	1	OTTDART00000032976	0	1	20752	XM_704110.3	XM_704110	NA	ENSDARG00000040476	567497	NA	Dr.32485	cbx3b	chromobox homolog 3b	chromobox homolog 3b	ZDB-GENE-070628-2	cbx3b	2	2	1	2	2	2	22122	NA	NA	NA
MAD_Dr_004_147986	OTTDART00000027182	1	0	NM_001089349.1	0	1	21766	NA	NA	NA	ENSDARG00000062363	386969	NA	NA	NA	NA	phosphate regulating gene with homologues to endopeptidases on the X chromosome	ZDB-GENE-030103-2	phex	2	2	1	2	2	2	22122	24	25259408	25297395
MAD_Dr_004_149042	NM_131252.1 ; Dr.75097	3	1	ENSDART00000056551 ; ENSDART00000008297 ; OTTDART00000037417	0	1	23170	NM_131252.1	NM_131252	ck2a1	ENSDARG00000002082	30502	casein kinase 2 alpha 1	Dr.75097	ck2a1	casein kinase 2 alpha 1	casein kinase 2 alpha 1	ZDB-GENE-990415-27	csnk2a1	2	2	1	2	2	2	22122	16	31478830	31494580
MAD_Dr_004_148449	NM_212665.1 ; Dr.76998 ; OTTDART00000030310	0	1		0	1	22384	NM_212665.1	NM_212665	dnaja2l	ENSDARG00000010745	324164	DnaJ (Hsp40) homolog, subfamily A, member 2, like	Dr.76998	dnaja2l	DnaJ (Hsp40) homolog, subfamily A, member 2, like	DnaJ (Hsp40) homolog, subfamily A, member 2, like	ZDB-GENE-030131-2884	dnaja2l	2	2	1	2	2	2	22122	18	6898109	6910394
MAD_Dr_004_180732	ENSDART00000035939	2	0	Dr.118099 ; NM_200916.1	0	1	70410	NA	NA	NA	ENSDARG00000025285	393890	NA	NA	NA	NA	pannexin 1	ZDB-GENE-040426-766	panx1a	2	2	1	2	2	2	22122	15	2512322	2526362
MAD_Dr_004_149150	ENSDART00000102535	1	1	Dr.16206	0	1	23325	NA	NA	NA	ENSDARG00000036893	561287	NA	NA	NA	NA	coagulation factor XIII, A1 polypeptide	ZDB-GENE-030131-9634	f13a1b	2	2	1	2	2	2	22122	7	8024805	8098285
MAD_Dr_004_149541	ENSDART00000114810 ; XM_001923161.1	0	1		0	1	23839	XM_001923161.1	XM_001923161	NA	ENSDARG00000079190	100149910	NA	NA	NA	NA	NA	ZDB-GENE-130924-1	sycp2l	2	2	1	2	2	2	22122	24	8702790	8716682
MAD_Dr_004_150299	OTTDART00000034343	0	-	-	0	1	24858	NA	NA	NA	ENSDARG00000061274	795400	NA	NA	NA	NA	NA	ZDB-GENE-050119-7	lss	2	2	1	2	2	2	22122	9	38671985	38690596
MAD_Dr_004_150958	OTTDART00000037223	3	1	NM_001115138.2 ; Dr.5648 ; ENSDART00000024282	0	1	25770	NA	NA	NA	ENSDARG00000020258	323597	NA	NA	NA	NA	Ewing sarcoma breakpoint region 1a	ZDB-GENE-030131-2317	ewsr1a	2	2	1	2	2	2	22122	10	8016885	8029717
MAD_Dr_004_151169	XM_686474.3 ; Dr.132720 ; OTTDART00000034473	0	1		0	1	26051	XM_686474.3	XM_686474	NA	ENSDARG00000016062	563108	NA	Dr.132720	si:dkey-206d17.12	si:dkey-206d17.12	si:dkey-206d17.12	ZDB-GENE-081031-82	si:dkey-206d17.12	2	2	1	2	2	2	22122	NA	NA	NA
MAD_Dr_004_151909	NM_001110456.1 ; Dr.88748 ; ENSDART00000090860	0	1		0	1	27001	NM_001110456.1	NM_001110456	oxnad1	ENSDARG00000062664	558500	oxidoreductase NAD-binding domain containing 1	Dr.88748	oxnad1	oxidoreductase NAD-binding domain containing 1	oxidoreductase NAD-binding domain containing 1	ZDB-GENE-060503-199	oxnad1	2	2	1	2	2	2	22122	19	20690168	20709561
MAD_Dr_004_153316	ENSDART00000074478	1	0	OTTDART00000045369	0	1	29047	NA	NA	NA	ENSDARG00000052594	445039	NA	NA	NA	NA	NFKB inhibitor interacting Ras-like 2	ZDB-GENE-040801-166	nkiras2	2	2	1	2	2	2	22122	3	17717376	17722106
MAD_Dr_004_154524	OTTDART00000002335	2	0	ENSDART00000051471 ; NM_001020786.1	0	1	31110	NA	NA	NA	ENSDARG00000035505	393137	NA	NA	NA	NA	cofactor of BRCA1	ZDB-GENE-040426-765	nelfb	2	2	1	2	2	2	22122	5	28948830	28959774
MAD_Dr_004_155014	ENSDART00000014292	3	1	OTTDART00000039501 ; Dr.6975 ; NM_199903.1	0	1	31777	NA	NA	NA	ENSDARG00000005355	334471	NA	NA	NA	NA	zgc:66107	ZDB-GENE-030131-6403	larp6	2	2	1	2	2	2	22122	18	284467	305708
MAD_Dr_004_156423	NM_001020735.1 ; Dr.91983	0	1		0	1	34499	NM_001020735.1	NM_001020735	pcyt1ab	ENSDARG00000004492	553770	phosphate cytidylyltransferase 1, choline, alpha b	Dr.91983	pcyt1ab	phosphate cytidylyltransferase 1, choline, alpha b	phosphate cytidylyltransferase 1, choline, alpha b	ZDB-GENE-050522-114	pcyt1ab	2	2	1	2	2	2	22122	18	46011156	46022120
MAD_Dr_004_156838	NM_001099239.1 ; Dr.75673	2	1	ENSDART00000016976 ; OTTDART00000038878	0	1	35105	NM_001099239.1	NM_001099239	zgc:165430	ENSDARG00000012777	553506	zgc:165430	Dr.75673	zgc:165430	zgc:165430	zgc:165430	ZDB-GENE-030131-4544	nucks1b	2	2	1	2	2	2	22122	23	18192185	18203936
MAD_Dr_004_157440	OTTDART00000023298	1	0	NM_200960.1	0	1	35887	NA	NA	NA	ENSDARG00000011175	393935	NA	NA	NA	NA	ATPase, H+ transporting, V1 subunit D; hypothetical LOC559256	ZDB-GENE-040426-727	atp6v1d	2	2	1	2	2	2	22122	20	51275386	51287449
MAD_Dr_004_169144	ENSDART00000089870	1	1	OTTDART00000035012	0	1	52622	NA	NA	NA	ENSDARG00000062297	564424	NA	NA	NA	NA	NA	ZDB-GENE-081105-177	soat1	2	2	1	2	2	2	22122	8	14848747	14872518
MAD_Dr_004_159227	ENSDART00000003418 ; ENSDART00000105197	4	1	XM_001331168.1 ; OTTDART00000029527 ; NM_001030102.2 ; Dr.109638	0	1	38556	NA	NA	NA	ENSDARG00000006235	-	NA	NA	NA	NA	NA	ZDB-GENE-050913-49	brms1la	2	2	1	2	2	2	22122	17	12599513	12610294
MAD_Dr_004_158958	ENSDART00000041609	1	1	OTTDART00000010082	0	1	38167	NA	NA	NA	ENSDARG00000028748	406698	NA	NA	NA	NA	transmembrane 9 superfamily member 3	ZDB-GENE-040426-2714	tm9sf3	2	2	1	2	2	2	22122	13	9523357	9543515
MAD_Dr_004_159047	ENSDART00000051776	3	0	XM_001331712.2 ; Dr.79112 ; NM_213343.1	0	1	38299	NA	NA	NA	ENSDARG00000035699	406652	NA	NA	NA	NA	hypothetical LOC791694; signal recognition particle 19	ZDB-GENE-040426-2657	srp19	2	2	1	2	2	2	22122	8	456095	463089
MAD_Dr_004_159969	ENSDART00000103498 ; NM_001045031.1 ; Dr.74235	0	1		0	1	39576	NM_001045031.1	NM_001045031	si:ch211-154o6.3	ENSDARG00000070489	563854	si:ch211-154o6.3	Dr.74235	si:ch211-154o6.3	si:ch211-154o6.3	si:ch211-154o6.3	ZDB-GENE-030131-1030	si:ch211-154o6.3	2	2	1	2	2	2	22122	NA	NA	NA
MAD_Dr_004_160876	ENSDART00000006093	2	0	Dr.88651 ; NM_001012497.1	0	1	40764	NA	NA	NA	ENSDARG00000015158	503533	NA	NA	NA	NA	recombination activating gene 1 activating protein 1	ZDB-GENE-050220-11	slc50a1	2	2	1	2	2	2	22122	16	23388827	23399846
MAD_Dr_004_161474	Dr.32775	1	0	ENSDART00000066861	0	1	41575	NA	NA	NA	ENSDARG00000045461	436918	NA	Dr.32775	zgc:92030	zgc:92030	zgc:92030	ZDB-GENE-040718-392	eci2	2	2	1	2	2	2	22122	NA	NA	NA
MAD_Dr_004_161604	ENSDART00000102567	2	1	Dr.79175 ; XM_685789.2	0	1	41758	NA	NA	NA	ENSDARG00000017504	562403	NA	NA	NA	NA	hypothetical LOC562403	ZDB-GENE-130530-561	zmp:0000000558	2	2	1	2	2	2	22122	7	8476603	8517185
MAD_Dr_004_503057	ENSDART00000114679	4	0	gi|503057 ; gi|161829 ; gi|174445 ; gi|174435	1	1	-2	NA	NA	NA	ENSDARG00000073734	336063	NA	NA	NA	NA	zgc:77665; wu:fa98a01	ZDB-GENE-030131-8007	arf6a	2	2	1	2	2	2	22122	NA	NA	NA
MAD_Dr_004_162491	OTTDART00000034537 ; XM_001337688.2	0	1		0	1	43078	XM_001337688.2	XM_001337688	NA	ENSDARG00000011573	797269	NA	NA	NA	NA	novel protein similar to vertebrate ATP-binding cassette, sub-family B (MDR/TAP), member 11 (ABCB11)	ZDB-GENE-050517-13	abcb11a	2	2	1	2	2	2	22122	9	49054562	49119634
MAD_Dr_004_178504	ENSDART00000023926	4	0	OTTDART00000017435 ; OTTDART00000017436 ; Dr.5119 ; NM_200839.1	0	1	66970	NA	NA	NA	ENSDARG00000002549	-	NA	NA	NA	NA	eukaryotic translation initiation factor 3, subuni	ZDB-GENE-050208-283	eif3eb	2	2	1	2	2	2	22122	19	23039945	23079965
MAD_Dr_004_181035	NM_001013562.1	1	1	OTTDART00000044583	0	1	71186	NM_001013562.1	NM_001013562	zgc:113074	ENSDARG00000015230	541437	zgc:113074	NA	NA	NA	zgc:113074	ZDB-GENE-050320-141	ptbp2a	2	2	1	2	2	2	22122	NA	NA	NA
MAD_Dr_004_163951	NM_001089583.1 ; Dr.85118	2	1	OTTDART00000038947 ; ENSDART00000104009	0	1	45032	NM_001089583.1	NM_001089583	zgc:162909	ENSDARG00000053896	100038803	zgc:162909	Dr.85118	zgc:162909	zgc:162909	zgc:162909	ZDB-GENE-070424-43	slc30a1b	2	2	1	2	2	2	22122	17	37268235	37273459
MAD_Dr_004_164436	XM_001923878.1 ; Dr.83787 ; OTTDART00000032739	1	1	ENSDART00000115364	0	1	45729	XM_001923878.1	XM_001923878	NA	ENSDARG00000077544	568260	NA	Dr.83787	si:dkey-40i22.3	si:dkey-40i22.3	si:dkey-40i22.3	ZDB-GENE-070912-533	toe1	2	2	1	2	2	2	22122	2	27724227	27730300
MAD_Dr_004_166658	NM_212682.1 ; Dr.1735	1	1	ENSDART00000081810	0	1	49032	NM_212682.1	NM_212682	clic1	ENSDARG00000058858	324481	chloride intracellular channel 1	Dr.1735	clic1	chloride intracellular channel 1	chloride intracellular channel 1; hypothetical protein LOC100150493	ZDB-GENE-030131-3202	clic1	2	2	1	2	2	2	22122	NA	NA	NA
MAD_Dr_004_167202	NM_001077258.1 ; Dr.83628	1	0	XM_681043.3	0	1	49808	NM_001077258.1	NM_001077258	zgc:153347	ENSDARG00000062749	768122	zgc:153347	Dr.83628	zgc:153347	zgc:153347	zgc:153347; hypothetical LOC557889	ZDB-GENE-061013-69	ino80b	2	2	1	2	2	2	22122	7	7463324	7473846
MAD_Dr_004_167232	NM_200003.1 ; Dr.75577 ; ENSDART00000047269	0	1		0	1	49856	NM_200003.1	NM_200003	h3f3c	ENSDARG00000033009	336231	H3 histone, family 3C	Dr.75577	h3f3c	H3 histone, family 3C	H3 histone, family 3C	ZDB-GENE-030131-8175	h3f3c	2	2	1	2	2	2	22122	5	36345114	36349323
MAD_Dr_004_168449	ENSDART00000099819	2	1	Dr.76430 ; NM_213165.1	0	1	51618	NA	NA	NA	ENSDARG00000026709	406444	NA	NA	NA	NA	zgc:85678	ZDB-GENE-040426-2193	bcl7ba	2	2	1	2	2	2	22122	NA	NA	NA
MAD_Dr_004_168022	ENSDART00000086326	1	0	NM_001089562.1	0	1	50989	NA	NA	NA	ENSDARG00000067920	571897	NA	NA	NA	NA	RAB8A, member RAS oncogene family	ZDB-GENE-070424-36	rab8a	2	2	1	2	2	2	22122	2	55539492	55565208
MAD_Dr_004_169736	NM_199530.1 ; Dr.19511	2	0	Dr.124253 ; OTTDART00000024169	0	1	5353	NM_199530.1	NM_199530	sec31a	ENSDARG00000021082	266638	sec31 homolog A (S. cerevisiae)	Dr.19511	sec31a	sec31 homolog A (S. cerevisiae)	sec31 homolog A (S. cerevisiae)	ZDB-GENE-020919-2	sec31a	2	2	1	2	2	2	22122	10	5093819	5135484
MAD_Dr_004_170404	OTTDART00000034304	0	-	-	0	1	54668	NA	NA	NA	ENSDARG00000068663	569013	NA	NA	NA	NA	NA	ZDB-GENE-060929-416	zgc:152951	2	2	1	2	2	2	22122	9	19332504	19358826
MAD_Dr_004_170497	NM_001110398.1 ; Dr.116332	1	1	ENSDART00000114396	0	1	54800	NM_001110398.1	NM_001110398	zgc:172155	ENSDARG00000079978	570533	zgc:172155	Dr.116332	zgc:172155	zgc:172155	zgc:172155	ZDB-GENE-080204-53	samd10a	2	2	1	2	2	2	22122	8	22956065	22984887
MAD_Dr_004_170662	NM_199778.1 ; Dr.78825	0	1		0	1	55016	NM_199778.1	NM_199778	elovl7b	ENSDARG00000005785	327274	ELOVL family member 7, elongation of long chain fa	Dr.78825	elovl7b	ELOVL family member 7, elongation of long chain fa	ELOVL family member 7, elongation of long chain fatty acids (yeast) b	ZDB-GENE-030131-5485	elovl7b	2	2	1	2	2	2	22122	NA	NA	NA
MAD_Dr_004_170686	OTTDART00000028131	0	-	-	0	1	55045	NA	NA	NA	ENSDARG00000058874	541506	NA	NA	NA	NA	NA	ZDB-GENE-050327-32	zgc:113227	2	2	1	2	2	2	22122	6	6505310	6509257
MAD_Dr_004_170934	NM_001076571.1 ; Dr.84204	2	0	ENSDART00000093222 ; ENSDART00000093216	0	1	55414	NM_001076571.1	NM_001076571	zgc:154100	ENSDARG00000063670	767629	zgc:154100	Dr.84204	zgc:154100	zgc:154100	zgc:154100	ZDB-GENE-060929-28	gtf2a1l	2	2	1	2	2	2	22122	13	70245	75621
MAD_Dr_004_172311	OTTDART00000025188	4	1	ENSDART00000007913 ; OTTDART00000025187 ; Dr.31059 ; NM_001002064.1	0	1	57610	NA	NA	NA	ENSDARG00000007141	321947	NA	NA	NA	NA	proteasome (prosome, macropain) 26S subunit, ATPase, 3	ZDB-GENE-030131-666	psmc3	2	2	1	2	2	2	22122	7	38408776	38413896
MAD_Dr_004_173033	XM_001344434.2 ; ENSDART00000111605	0	1		0	1	58747	XM_001344434.2	XM_001344434	NA	ENSDARG00000074004	-	NA	NA	NA	NA	NA	NA	NA	2	2	1	2	2	2	22122	17	24728808	24771413
MAD_Dr_004_504571	OTTDART00000040154	2	1	gi|504571 ; gi|173218	1	1	-2	NA	NA	NA	ENSDARG00000039980	406648	NA	NA	NA	NA	NA	ZDB-GENE-040426-2653	ppt1	2	2	1	2	2	2	22122	19	44145087	44161971
MAD_Dr_004_174437	NM_001007179.2 ; Dr.84932	1	0	ENSDART00000061677	0	1	60781	NM_001007179.2	NM_001007179	si:ch211-14a17.6	ENSDARG00000077795	100007955	si:ch211-14a17.6	Dr.84932	si:ch211-14a17.6	si:ch211-14a17.6	si:ch211-14a17.6	ZDB-GENE-030616-589	si:ch211-14a17.6	2	2	1	2	2	2	22122	NA	NA	NA
MAD_Dr_004_175914	ENSDART00000110060	4	0	Dr.152295 ; NM_001099235.1 ; Dr.118358 ; XM_001918653.1	0	1	63024	NA	NA	NA	ENSDARG00000076214	-	NA	NA	NA	NA	NA	NA	NA	2	2	1	2	2	2	22122	15	44161036	44165591
MAD_Dr_004_175375	ENSDART00000061677	2	0	Dr.84932 ; NM_001007179.2	0	1	62171	NA	NA	NA	ENSDARG00000054313	100007955	NA	NA	NA	NA	si:ch211-14a17.6	ZDB-GENE-030616-589	si:ch211-14a17.6	2	2	1	2	2	2	22122	2	38303086	38305696
MAD_Dr_004_175485	NM_001076585.1	2	0	ENSDART00000098295 ; Dr.81693	0	1	62376	NM_001076585.1	NM_001076585	zgc:153993	ENSDARG00000068102	767645	zgc:153993	NA	NA	NA	zgc:153993	ZDB-GENE-060929-176	zgc:153993	2	2	1	2	2	2	22122	NA	NA	NA
MAD_Dr_004_177173	OTTDART00000028447	0	-	-	0	1	64901	NA	NA	NA	ENSDARG00000052010	436722	NA	NA	NA	NA	NA	ZDB-GENE-040718-148	fam96b	2	2	1	2	2	2	22122	7	44626548	44631769
MAD_Dr_004_177488	OTTDART00000032405	3	1	ENSDART00000064088 ; Dr.30880 ; NM_001020688.1	0	1	65373	NA	NA	NA	ENSDARG00000043644	553717	NA	NA	NA	NA	vitamin K epoxide reductase complex, subunit 1-like 1	ZDB-GENE-050522-210	vkorc1l1	2	2	1	2	2	2	22122	5	1737479	1782476
MAD_Dr_004_177579	OTTDART00000024123	0	-	-	0	1	65548	NA	NA	NA	ENSDARG00000008886	30511	NA	NA	NA	NA	NA	ZDB-GENE-980526-26	msxb	2	2	1	2	2	2	22122	1	48708480	48710893
MAD_Dr_004_177645	NM_001003590.1 ; Dr.117056	5	0	ENSDART00000067607 ; ENSDART00000103039 ; XR_029185.2 ; XM_001330900.2 ; Dr.33948	0	1	65666	NM_001003590.1	NM_001003590	zgc:101030	ENSDARG00000045989	445196	zgc:101030	Dr.117056	zgc:101030	zgc:101030	similar to ADP-ribosylation factor 5; zgc:101030; hypothetical LOC791832	ZDB-GENE-040801-109	arf4a	2	2	1	2	2	2	22122	11	42203969	42212378
MAD_Dr_004_179934	OTTDART00000038343	1	1	ENSDART00000101219	0	1	69226	NA	NA	NA	ENSDARG00000069507	678636	NA	NA	NA	NA	NA	ZDB-GENE-060421-5918	wbscr27	2	2	1	2	2	2	22122	21	25759270	25765381
MAD_Dr_004_181535	NM_001103124.1 ; Dr.43980 ; ENSDART00000019561	0	1		0	1	72250	NM_001103124.1	NM_001103124	zgc:171734	ENSDARG00000004864	570997	zgc:171734	Dr.43980	zgc:171734	zgc:171734	zgc:171734	ZDB-GENE-070928-26	zgc:171734	2	2	1	2	2	2	22122	5	58009362	58014746
MAD_Dr_004_182281	NM_001100101.1 ; Dr.94385	2	1	Dr.82241 ; NM_001037439.1	0	1	73570	NM_001100101.1	NM_001100101	zgc:165653	ENSDARG00000071292	100006671	zgc:165653	Dr.94385	zgc:165653	zgc:165653	zgc:165653	ZDB-GENE-070620-24	zgc:165653	2	2	1	2	2	2	22122	NA	NA	NA
MAD_Dr_004_182792	XM_702238.3	0	-	-	0	1	74287	XM_702238.3	XM_702238	NA	ENSDARG00000086627	-	NA	NA	NA	NA	NA	NA	NA	2	2	1	2	2	2	22122	NA	NA	NA
MAD_Dr_004_183372	XM_001331029.2 ; ENSDART00000056283	3	0	OTTDART00000029110 ; Dr.83955 ; NM_001013454.1	0	1	75289	XM_001331029.2	XM_001331029	NA	ENSDARG00000038556	541326	NA	NA	NA	NA	zgc:112185; hypothetical LOC792237	ZDB-GENE-050320-14	zgc:112185	2	2	1	2	2	2	22122	24	37793185	37800501
MAD_Dr_004_184157	NM_001045851.1 ; Dr.76210	2	0	ENSDART00000084184 ; OTTDART00000036400	0	1	76495	NM_001045851.1	NM_001045851	aimp1	ENSDARG00000060036	562232	aminoacyl tRNA synthetase complex-interacting mult	Dr.76210	aimp1	aminoacyl tRNA synthetase complex-interacting mult	zgc:154081	ZDB-GENE-060825-144	aimp1	2	2	1	2	2	2	22122	1	49650112	49675828
MAD_Dr_004_184111	OTTDART00000026784	1	1	OTTDART00000026783	0	1	76421	NA	NA	NA	ENSDARG00000010097	359826	NA	NA	NA	NA	NA	ZDB-GENE-030714-2	f9a	2	2	1	2	2	2	22122	14	32090668	32097886
MAD_Dr_004_184143	ENSDART00000113834	3	1	Dr.13851 ; NM_001115142.1 ; ENSDART00000058505	0	1	76474	NA	NA	NA	ENSDARG00000039989	325757	NA	NA	NA	NA	small nuclear ribonucleoprotein 48 (U11/U12)	ZDB-GENE-030131-4482	snrnp48	2	2	1	2	2	2	22122	16	37020639	37025744
MAD_Dr_004_185153	NM_001077745.1 ; Dr.87592	0	1		0	1	7803	NM_001077745.1	NM_001077745	zgc:153125	ENSDARG00000070119	777638	zgc:153125	Dr.87592	zgc:153125	zgc:153125	zgc:153125; similar to Uncharacterized protein C17orf68 (HBV DNAPTP1-transactivated protein B)	ZDB-GENE-061103-271	ctc1	2	2	1	2	2	2	22122	23	45270774	45325842
MAD_Dr_004_185250	NM_001017589.1 ; Dr.80171 ; ENSDART00000067174 ; ENSDART00000067172	1	1	OTTDART00000008827	0	1	78152	NM_001017589.1	NM_001017589	zcrb1	ENSDARG00000045691	550251	zinc finger CCHC-type and RNA binding motif 1	Dr.80171	zcrb1	zinc finger CCHC-type and RNA binding motif 1	zinc finger CCHC-type and RNA binding motif 1	ZDB-GENE-041210-114	zcrb1	2	2	1	2	2	2	22122	4	13926429	13932659
MAD_Dr_004_185515	OTTDART00000028429	0	-	-	0	1	78568	NA	NA	NA	ENSDARG00000092703	447894	NA	NA	NA	NA	NA	ZDB-GENE-040912-59	zgc:101715	2	2	1	2	2	2	22122	NA	NA	NA
MAD_Dr_004_185985	ENSDART00000112896	0	-	-	0	1	79248	NA	NA	NA	ENSDARG00000079783	-	NA	NA	NA	NA	NA	NA	NA	2	2	1	2	2	2	22122	25	18997280	19002518
MAD_Dr_004_187727	ENSDART00000082340	2	1	Dr.79339 ; NM_001017678.1	0	1	81773	NA	NA	NA	ENSDARG00000059270	550373	NA	NA	NA	NA	peptidylprolyl isomerase E (cyclophilin E)	ZDB-GENE-050417-167	ppie	2	2	1	2	2	2	22122	NA	NA	NA
MAD_Dr_004_186219	ENSDART00000023509	2	0	XM_703904.3 ; Dr.83495	0	1	79595	NA	NA	NA	ENSDARG00000012947	449942	NA	NA	NA	NA	NA	ZDB-GENE-041008-202	im:7140390	2	2	1	2	2	2	22122	10	33425740	33435784
MAD_Dr_004_186646	OTTDART00000039588	3	1	Dr.152251 ; NM_001002520.1 ; OTTDART00000021345	0	1	80240	NA	NA	NA	ENSDARG00000057296	436793	NA	NA	NA	NA	cerebellin 1 precursor	ZDB-GENE-040718-226	cbln1	2	2	1	2	2	2	22122	18	18115169	18120966
MAD_Dr_004_187111	Dr.32617 ; NM_153673.2 ; OTTDART00000024993 ; ENSDART00000002164	0	1		0	1	8087	NM_153673.2	NM_153673	unc45b	ENSDARG00000008433	266640	unc-45 homolog B (C. elegans)	Dr.32617	wu:fa10f02	wu:fa10f02	unc-45 homolog B (C. elegans)	ZDB-GENE-020919-3	unc45b	2	2	1	2	2	2	22122	8	11166354	11191818
MAD_Dr_004_187273	ENSDART00000006514	0	-	-	0	1	81076	NA	NA	NA	ENSDARG00000006816	100148942	NA	NA	NA	NA	general transcription factor IIF, polypeptide 2b	ZDB-GENE-050417-374	gtf2f2b	2	2	1	2	2	2	22122	9	18821648	18897605
MAD_Dr_004_187505	OTTDART00000010463	0	-	-	0	1	81411	NA	NA	NA	ENSDARG00000095295	571927	NA	NA	NA	NA	NA	ZDB-GENE-050208-407	si:rp71-36a1.1	2	2	1	2	2	2	22122	22	5880274	5888824
MAD_Dr_004_192381	OTTDART00000010646	1	0	Dr.120100	0	1	91892	NA	NA	NA	ENSDARG00000071541	558811	NA	NA	NA	NA	si:dkey-42i9.8	ZDB-GENE-050208-412	si:dkey-42i9.8	2	2	1	2	2	2	22122	22	10556614	10562194
MAD_Dr_004_188234	XM_683051.3	0	-	-	0	1	82696	XM_683051.3	XM_683051	NA	ENSDARG00000089607	-	NA	NA	NA	NA	NA	NA	NA	2	2	1	2	2	2	22122	17	49466616	49468012
MAD_Dr_004_192823	ENSDART00000060037 ; NM_001002707.2	3	0	OTTDART00000037640 ; OTTDART00000037641 ; Dr.81055	0	1	92605	NM_001002707.2	NM_001002707	zgc:92606	ENSDARG00000040971	100000242	zgc:92606	NA	NA	NA	zgc:92606	ZDB-GENE-040718-462	zgc:92606	2	2	1	2	2	2	22122	16	12374256	12385323
MAD_Dr_004_189214	NM_131245.1	1	0	ENSDART00000059732	0	1	87485	NM_131245.1	NM_131245	id1	ENSDARG00000040764	30493	inhibitor of DNA binding 1	NA	NA	NA	inhibitor of DNA binding 1	ZDB-GENE-990415-96	id1	2	2	1	2	2	2	22122	11	18541849	18542961
MAD_Dr_004_189961	ENSDART00000109753	3	0	XM_703904.3 ; ENSDART00000023509 ; Dr.83495	0	1	88595	NA	NA	NA	ENSDARG00000079161	-	NA	NA	NA	NA	NA	ZDB-GENE-120628-1	bsnb	2	2	1	2	2	2	22122	11	37164444	37184993
MAD_Dr_004_193370	ENSDART00000045385	0	-	-	0	1	93340	NA	NA	NA	ENSDARG00000030347	58070	NA	NA	NA	NA	mesoderm posterior b	ZDB-GENE-000406-9	mespba	2	2	1	2	2	2	22122	7	15059932	15068444
MAD_Dr_004_193445	Dr.76531	1	0	ENSDART00000062080	0	1	93422	NA	NA	NA	ENSDARG00000042337	503606	NA	Dr.76531	zgc:110753	zgc:110753	zgc:110753	ZDB-GENE-050227-18	chrac1	2	2	1	2	2	2	22122	19	41930704	41933896
MAD_Dr_004_199614	ENSDART00000063024	5	1	ENSDART00000103085 ; XM_685620.3 ; OTTDART00000045264 ; Dr.90416 ; NM_001080697.1	0	1	99993	NA	NA	NA	ENSDARG00000042933	791215	NA	NA	NA	NA	hypothetical LOC562222; zgc:158718	ZDB-GENE-070112-1862	bloc1s6	2	2	1	2	2	2	22122	18	5653163	5656754
MAD_Dr_004_197498	NM_001110455.1 ; Dr.132512 ; ENSDART00000083976	1	1	OTTDART00000037920	0	1	9781	NM_001110455.1	NM_001110455	sh2b1	ENSDARG00000057679	558152	SH2B adaptor protein 1	Dr.132512	sh2b1	SH2B adaptor protein 1	SH2B adaptor protein 1	ZDB-GENE-070209-188	sh2b1	2	2	1	2	2	2	22122	3	15208659	15242670
MAD_Dr_004_197864	OTTDART00000039877	1	1	XM_680648.3	0	1	98177	NA	NA	NA	ENSDARG00000093151	557562	NA	NA	NA	NA	NA	ZDB-GENE-081031-87	si:ch73-299h12.9	2	2	1	2	2	2	22122	NA	NA	NA
MAD_Dr_004_501957	ENSDART00000090196	4	1	gi|501957 ; gi|156798 ; gi|119634 ; gi|119588	1	1	-2	NA	NA	NA	ENSDARG00000062379	777628	NA	NA	NA	NA	zgc:153507; hypothetical protein LOC100149862	ZDB-GENE-061103-595	slc35a4	2	2	1	2	2	2	22122	14	2811491	2820521
MAD_Dr_004_504067	OTTDART00000027232	7	1	gi|504067 ; gi|187857 ; gi|184590 ; gi|182952 ; gi|180135 ; gi|180131 ; gi|108187	1	1	-2	NA	NA	NA	ENSDARG00000013613	554118	NA	NA	NA	NA	zgc:112421	ZDB-GENE-050522-310	anxa13l	2	2	1	2	2	2	22122	2	10023937	10044420
MAD_Dr_004_148042	OTTDART00000036272	3	0	ENSDART00000010092 ; Dr.80253 ; NM_199978.1	0	1	21826	NA	NA	NA	ENSDARG00000007804	335830	NA	NA	NA	NA	growth arrest-specific 6	ZDB-GENE-030131-7773	gas6	2	2	1	2	2	2	22122	1	317536	358986
MAD_Dr_004_190060	NM_001089523.1	1	1	OTTDART00000038806	0	1	88777	NM_001089523.1	NM_001089523	zgc:162267	ENSDARG00000051731	559470	zgc:162267	NA	NA	NA	zgc:162267	ZDB-GENE-070410-53	zgc:162267	2	2	1	2	2	2	22122	25	35735004	35742627
MAD_Dr_004_116005	ENSDART00000004984 ; ENSDART00000109084 ; Dr.74015	1	1	OTTDART00000005339	0	1	11642	NA	NA	NA	ENSDARG00000009689	560060	NA	Dr.74015	daam1b	dishevelled associated activator of morphogenesis	dishevelled associated activator of morphogenesis 1, like	ZDB-GENE-030131-4212	daam1b	2	2	1	2	2	2	22122	20	21914915	22095228
MAD_Dr_004_153689	NM_001009917.1	0	-	-	0	1	29912	NM_001009917.1	NM_001009917	tfr1a	ENSDARG00000058784	494477	transferrin receptor 1a	NA	NA	NA	transferrin receptor 1a	ZDB-GENE-041220-1	tfr1a	2	2	1	2	2	2	22122	NA	NA	NA
MAD_Dr_004_156482	ENSDART00000074963	1	1	OTTDART00000028410	0	1	34570	NA	NA	NA	ENSDARG00000053010	553683	NA	NA	NA	NA	zgc:112165	ZDB-GENE-050522-229	lpcat2	2	2	1	2	2	2	22122	7	35114612	35137141
MAD_Dr_004_162772	ENSDART00000081919	0	-	-	0	1	43470	NA	NA	NA	ENSDARG00000058950	569952	NA	NA	NA	NA	NA	NA	NA	2	2	1	2	2	2	22122	NA	NA	NA
MAD_Dr_004_163109	NM_001002593.1 ; Dr.86839	2	0	ENSDART00000079848 ; OTTDART00000027141	0	1	43901	NM_001002593.1	NM_001002593	tnfsf10l2	ENSDARG00000057241	436866	tumor necrosis factor (ligand) superfamily, member	Dr.86839	tnfsf10l2	tumor necrosis factor (ligand) superfamily, member	tumor necrosis factor (ligand) superfamily, member 10 like 2	ZDB-GENE-040718-335	tnfsf10	2	2	1	2	2	2	22122	24	26853313	26858367
MAD_Dr_004_164377	NM_001113627.1 ; XM_001918713.1 ; Dr.113750 ; ENSDART00000073833	0	1		0	1	45649	NM_001113627.1	NM_001113627	zgc:172007	ENSDARG00000096553	792701	zgc:172007	Dr.113750	NA	NA	zgc:172007; similar to zinc finger protein 568; hypothetical protein LOC100151227; zgc:174890; similar to zinc finger protein 782	NA	NA	2	2	1	2	2	2	22122	NA	NA	NA
MAD_Dr_004_176272	ENSDART00000080343	1	1	OTTDART00000028991	0	1	63547	NA	NA	NA	ENSDARG00000057632	431749	NA	NA	NA	NA	leucine rich repeat containing 67	ZDB-GENE-040704-43	ppp1r42	2	2	1	2	2	2	22122	24	23584887	23595725
MAD_Dr_004_176340	OTTDART00000025617	1	1	ENSDART00000023796	0	1	63647	NA	NA	NA	ENSDARG00000079271	550282	NA	NA	NA	NA	NA	ZDB-GENE-030131-7002	dcxr	2	2	1	2	2	2	22122	12	3008564	3019149
MAD_Dr_004_179363	OTTDART00000027998	1	0	NM_001020667.1	0	1	68386	NA	NA	NA	ENSDARG00000052617	553693	NA	NA	NA	NA	ribonucleoprotein, PTB-binding 1	ZDB-GENE-050522-99	raver1	2	2	1	2	2	2	22122	3	48607272	48634672
MAD_Dr_004_187410	NM_001083074.2 ; Dr.82237	2	1	ENSDART00000104551 ; OTTDART00000020547	0	1	81263	NM_001083074.2	NM_001083074	si:ch211-232m10.4	ENSDARG00000070933	100034506	si:ch211-232m10.4	Dr.82237	si:ch211-232m10.4	si:ch211-232m10.4	si:ch211-232m10.4	ZDB-GENE-060503-785	tmem238	2	2	1	2	2	2	22122	NA	NA	NA
MAD_Dr_004_188440	OTTDART00000034089	1	1	OTTDART00000022400	0	1	83014	NA	NA	NA	ENSDARG00000093040	-	NA	NA	NA	NA	NA	ZDB-GENE-070912-327	si:ch211-89b14.1	2	2	1	2	2	2	22122	9	11851176	11884102
MAD_Dr_004_198801	OTTDART00000036670	1	1	OTTDART00000036669	0	1	99122	NA	NA	NA	ENSDARG00000015865	393144	NA	NA	NA	NA	NA	ZDB-GENE-040426-797	trim25	2	2	1	2	2	2	22122	NA	NA	NA
MAD_Dr_004_103048	ENSDART00000109900	1	1	XM_687629.1	0	1	103179	NA	NA	NA	ENSDARG00000074025	564281	NA	NA	NA	NA	NA	NA	NA	2	2	1	2	2	2	22122	NA	NA	NA
MAD_Dr_004_104632	OTTDART00000034542	1	1	Dr.112199	0	1	104779	NA	NA	NA	ENSDARG00000095101	-	NA	NA	NA	NA	NA	ZDB-GENE-081104-187	si:ch211-229g14.3	2	2	1	2	2	2	22122	9	45311585	45322038
MAD_Dr_004_105887	OTTDART00000019559	0	-	-	0	1	106082	NA	NA	NA	ENSDARG00000092831	-	NA	NA	NA	NA	NA	ZDB-GENEP-060503-6	si:dkeyp-46h3.9	2	2	1	2	2	2	22122	19	27997527	28000514
MAD_Dr_004_106439	XM_001919886.1	0	-	-	0	1	10665	XM_001919886.1	XM_001919886	NA	ENSDARG00000033327	338194	NA	NA	NA	NA	unc-5 homolog B (C. elegans); id:ibd5083	ZDB-GENE-041213-1	unc5b	2	2	1	2	2	2	22122	13	28997628	29097341
MAD_Dr_004_171169	OTTDART00000027033	0	-	-	0	1	55840	NA	NA	NA	ENSDARG00000013423	393315	NA	NA	NA	NA	similar to Kynurenine--oxoglutarate transaminase 3 (Kynurenine--oxoglutarate transaminase III) (Kynurenine aminotransferase III) (KATIII) (Cysteine-S-conjugate beta-lyase 2); cysteine conjugate-beta lyase 2	ZDB-GENE-040426-1299	ccbl2	2	2	1	2	2	2	22122	NA	NA	NA
MAD_Dr_004_503679	OTTDART00000010787	4	1	gi|503679 ; gi|112750 ; gi|110696 ; gi|110655	1	1	-2	NA	NA	NA	ENSDARG00000039096	556718	NA	NA	NA	NA	si:dkey-24p1.1	ZDB-GENE-060503-631	si:dkey-24p1.1	2	2	1	2	2	2	22122	15	38199550	38228260
MAD_Dr_004_112698	ENSDART00000093096	1	1	XM_687949.3	0	1	113001	NA	NA	NA	ENSDARG00000063600	564616	NA	NA	NA	NA	similar to potassium channel tetramerisation domain containing 14	ZDB-GENE-120215-239	kctd14	2	2	1	2	2	2	22122	NA	NA	NA
MAD_Dr_004_112965	OTTDART00000014372	0	-	-	0	1	113265	NA	NA	NA	ENSDARG00000043095	8388607	NA	NA	NA	NA	NA	ZDB-GENE-050208-474	kctd6a	2	2	1	2	2	2	22122	22	10185147	10192796
MAD_Dr_004_128976	ENSDART00000074290	1	0	Dr.92517	0	1	128902	NA	NA	NA	ENSDARG00000052437	569807	NA	NA	NA	NA	zgc:194158	ZDB-GENE-081022-66	mia	2	2	1	2	2	2	22122	5	56983074	56984954
MAD_Dr_004_118001	OTTDART00000044606	1	1	NM_001109702.1	0	1	118561	NA	NA	NA	ENSDARG00000028771	557679	NA	NA	NA	NA	zgc:171788	ZDB-GENE-071004-41	mapre2	2	2	1	2	2	2	22122	NA	NA	NA
MAD_Dr_004_118831	ENSDART00000074208	1	1	XM_001340235.2	0	1	119270	NA	NA	NA	ENSDARG00000052368	100329879	NA	NA	NA	NA	NA	NA	NA	2	2	1	2	2	2	22122	14	45872524	45887907
MAD_Dr_004_119586	ENSDART00000056043	3	0	Dr.114138 ; XM_001345752.2 ; XM_001345778.2	0	1	119988	NA	NA	NA	ENSDARG00000038404	-	NA	NA	NA	NA	NA	NA	NA	2	2	1	2	2	2	22122	NA	NA	NA
MAD_Dr_004_122945	OTTDART00000033765	1	1	OTTDART00000033768	0	1	123414	NA	NA	NA	ENSDARG00000094811	-	NA	NA	NA	NA	NA	ZDB-GENE-070912-351	si:dkey-111i23.1	2	2	1	2	2	2	22122	9	26388755	26693583
MAD_Dr_004_192548	OTTDART00000045596	1	1	Dr.110799	0	1	92262	NA	NA	NA	ENSDARG00000094295	-	NA	NA	NA	NA	NA	ZDB-GENE-070912-545	si:dkey-4i23.7	2	2	1	2	2	2	22122	2	35499699	35514576
MAD_Dr_004_128413	OTTDART00000022381	0	-	-	0	1	12838	NA	NA	NA	ENSDARG00000074034	-	NA	NA	NA	NA	NA	ZDB-GENE-050208-441	si:dkey-91i10.2	2	2	1	2	2	2	22122	9	23130093	23153028
MAD_Dr_004_128454	Dr.85440 ; OTTDART00000006632	0	1		0	1	128421	NA	NA	NA	ENSDARG00000095457	8388607	NA	Dr.85440	si:ch211-147d7.5	si:ch211-147d7.5	si:ch211-147d7.5	ZDB-GENE-041014-353	si:ch211-147d7.5	2	2	1	2	2	2	22122	20	37928473	37929060
MAD_Dr_004_132600	OTTDART00000013317	0	-	-	0	1	132201	NA	NA	NA	ENSDARG00000093726	-	NA	NA	NA	NA	NA	ZDB-GENE-060503-412	si:ch211-240j18.2	2	2	1	2	2	2	22122	5	11772231	11779910
MAD_Dr_004_141775	ENSDART00000115248 ; ENSDART00000111339	0	1		0	1	141275	NA	NA	NA	ENSDARG00000075622	100126020	NA	NA	NA	NA	NA	ZDB-GENE-070928-44	zgc:174938	2	2	1	2	2	2	22122	16	46601638	46606118
MAD_Dr_004_144888	ENSDART00000064701	1	1	OTTDART00000035990	0	1	17608	NA	NA	NA	ENSDARG00000044074	791144	NA	NA	NA	NA	lysyl oxidase-like 2b	ZDB-GENE-050208-29	loxl2b	2	2	1	2	2	2	22122	5	26840168	26887645
MAD_Dr_004_146294	ENSDART00000085661	2	1	Dr.54147 ; XM_001923995.1	0	1	19389	NA	NA	NA	ENSDARG00000060639	327160	NA	NA	NA	NA	NA	ZDB-GENE-030131-5371	apba2b	2	2	1	2	2	2	22122	7	30552697	30644815
MAD_Dr_004_147477	OTTDART00000027849	0	-	-	0	1	20975	NA	NA	NA	ENSDARG00000031048	445485	NA	NA	NA	NA	NA	ZDB-GENE-040822-36	gspt1	2	2	1	2	2	2	22122	12	19240461	19262071
MAD_Dr_004_148968	NM_001042753.1 ; Dr.84695	0	1		0	1	23086	NM_001042753.1	NM_001042753	zgc:136337	ENSDARG00000052896	553432	zgc:136337	Dr.84695	zgc:136337	zgc:136337	zgc:136337	ZDB-GENE-060616-45	lrit1b	2	2	1	2	2	2	22122	NA	NA	NA
MAD_Dr_004_158499	ENSDART00000036280	3	1	OTTDART00000028738 ; Dr.26600 ; NM_200415.1	0	1	37491	NA	NA	NA	ENSDARG00000023526	393387	NA	NA	NA	NA	gamma-glutamyltransferase 1	ZDB-GENE-040426-1388	ggt1a	2	2	1	2	2	2	22122	8	40008858	40042209
MAD_Dr_004_154957	ENSDART00000055380	0	-	-	0	1	31707	NA	NA	NA	ENSDARG00000037997	386701	NA	NA	NA	NA	tubulin, beta 5	ZDB-GENE-031110-4	tubb5	2	2	1	2	2	2	22122	16	10428030	10436679
MAD_Dr_004_157114	OTTDART00000016103	0	-	-	0	1	35471	NA	NA	NA	ENSDARG00000032079	567157	NA	NA	NA	NA	NA	ZDB-GENE-050420-181	acsl3a	2	2	1	2	2	2	22122	15	43038949	43122110
MAD_Dr_004_157519	OTTDART00000009827	1	1	ENSDART00000103752	0	1	35988	NA	NA	NA	ENSDARG00000055552	560032	NA	NA	NA	NA	NA	ZDB-GENE-071004-1	dvl1b	2	2	1	2	2	2	22122	11	24123128	24190703
MAD_Dr_004_164381	XM_001922351.1 ; OTTDART00000039178 ; ENSDART00000105572	2	1	Dr.81466 ; NM_174861.2	0	1	45654	XM_001922351.1	XM_001922351	NA	ENSDARG00000071418	142985	NA	NA	NA	NA	gastrulation brain homeobox 1; similar to gastrulation brain homeobox 1	ZDB-GENE-020117-2	gbx1	2	2	1	2	2	2	22122	24	34227249	34230351
MAD_Dr_004_165928	OTTDART00000026694 ; ENSDART00000049420	0	1		0	1	47965	NA	NA	NA	ENSDARG00000010420	393665	NA	NA	NA	NA	N-myc downstream regulated gene 1, like	ZDB-GENE-040426-1648	ndrg1b	2	2	1	2	2	2	22122	16	31553812	31559300
MAD_Dr_004_167283	OTTDART00000042158	1	1	ENSDART00000005072	0	1	49927	NA	NA	NA	ENSDARG00000020788	568515	NA	NA	NA	NA	zgc:171590	ZDB-GENE-080204-98	sla2	2	2	1	2	2	2	22122	23	15052144	15074550
MAD_Dr_004_168046	OTTDART00000044390	0	-	-	0	1	51017	NA	NA	NA	ENSDARG00000071727	407641	NA	NA	NA	NA	NA	ZDB-GENE-030131-5667	si:dkey-37o8.1	2	2	1	2	2	2	22122	24	10758304	10760984
MAD_Dr_004_169200	OTTDART00000040036	1	0	OTTDART00000040041	0	1	52701	NA	NA	NA	ENSDARG00000014594	353358	NA	NA	NA	NA	NA	ZDB-GENE-030131-6554	anxa1b	2	2	1	2	2	2	22122	NA	NA	NA
MAD_Dr_004_170278	ENSDART00000100405	4	0	OTTDART00000023826 ; ENSDART00000073777 ; Dr.108683 ; NM_001018146.1	0	1	54492	NA	NA	NA	ENSDARG00000078242	-	NA	NA	NA	NA	NA	NA	NA	2	2	1	2	2	2	22122	NA	NA	NA
MAD_Dr_004_170695	NM_001076636.1 ; Dr.87314	1	0	ENSDART00000114133	0	1	55059	NM_001076636.1	NM_001076636	zgc:153039	ENSDARG00000060524	767698	zgc:153039	Dr.87314	zgc:153039	zgc:153039	zgc:153039	ZDB-GENE-060929-736	zgc:153039	2	2	1	2	2	2	22122	NA	NA	NA
MAD_Dr_004_172214	OTTDART00000044559	1	1	XM_001342655.2	0	1	57491	NA	NA	NA	ENSDARG00000005332	-	NA	NA	NA	NA	NA	ZDB-GENE-091118-47	lipi	2	2	1	2	2	2	22122	24	23941317	23955958
MAD_Dr_004_172688	ENSDART00000074261	0	-	-	0	1	58192	NA	NA	NA	ENSDARG00000052411	-	NA	NA	NA	NA	si:dkey-71l1.1	ZDB-GENE-070705-489	si:dkey-71l1.1	2	2	1	2	2	2	22122	5	57021762	57045055
MAD_Dr_004_191963	ENSDART00000061394	2	0	ENSDART00000049430 ; Dr.90640	0	1	91367	NA	NA	NA	ENSDARG00000029907	563772	NA	NA	NA	NA	si:dkey-221h15.2	ZDB-GENE-041014-342	trim54	2	2	1	2	2	2	22122	20	38827412	38855918
MAD_Dr_004_174394	NM_212976.1 ; OTTDART00000025841	0	1		0	1	60710	NM_212976.1	NM_212976	itm2bb	ENSDARG00000041505	406248	integral membrane protein 2Bb	NA	NA	NA	integral membrane protein 2Bb	ZDB-GENE-040426-2139	itm2bb	2	2	1	2	2	2	22122	9	25520036	25535714
MAD_Dr_004_175282	ENSDART00000086151 ; NM_001089399.2 ; Dr.94377	8	0	OTTDART00000012653 ; Dr.74106 ; Dr.132955 ; NM_001044711.1 ; ENSDART00000057459 ; OTTDART00000012657 ; ENSDART00000074105 ; OTTDART00000012660	0	1	62006	NM_001089399.2	NM_001089399	si:ch211-284p22.1	ENSDARG00000075637	562814	si:ch211-284p22.1	Dr.94377	si:ch211-284p22.1	si:ch211-284p22.1	si:ch211-284p22.1	ZDB-GENE-070424-178	trim35-19	2	2	1	2	2	2	22122	NA	NA	NA
MAD_Dr_004_175294	OTTDART00000038582	0	-	-	0	1	62027	NA	NA	NA	ENSDARG00000021241	792578	NA	NA	NA	NA	NA	ZDB-GENE-070615-34	zgc:165604	2	2	1	2	2	2	22122	21	27521686	27533521
MAD_Dr_004_179047	OTTDART00000029646	2	1	Dr.84982 ; NM_001030204.1	0	1	67910	NA	NA	NA	ENSDARG00000053548	566219	NA	NA	NA	NA	D4, zinc and double PHD fingers family 1	ZDB-GENE-050913-31	dpf1	2	2	1	2	2	2	22122	NA	NA	NA
MAD_Dr_004_503460	NM_212830.1	4	0	gi|503460 ; gi|500897 ; gi|177851 ; gi|123268	1	1	-2	NM_212830.1	NM_212830	nkx1.2la	ENSDARG00000006350	405755	NK1 transcription factor related 2-like,a	NA	NA	NA	NK1 transcription factor related 2-like,a	ZDB-GENE-040615-1	nkx1.2la	2	2	1	2	2	2	22122	13	40644738	40649640
MAD_Dr_004_178778	OTTDART00000032159	1	1	XM_001919577.1	0	1	67507	NA	NA	NA	ENSDARG00000015589	-	NA	NA	NA	NA	NA	ZDB-GENE-070912-531	ankrd33bb	2	2	1	2	2	2	22122	2	30548193	30564683
MAD_Dr_004_179673	OTTDART00000039772	3	0	ENSDART00000115071 ; XM_001923882.1 ; Dr.8516	0	1	68831	NA	NA	NA	ENSDARG00000079727	791479	NA	NA	NA	NA	selenoprotein P, plasma, 1b	ZDB-GENE-030311-2	sepp1b	2	2	1	2	2	2	22122	2	27739164	27745471
MAD_Dr_004_180942	OTTDART00000029067	0	-	-	0	1	71011	NA	NA	NA	ENSDARG00000008921	436725	NA	NA	NA	NA	NA	ZDB-GENE-040718-151	acp5b	2	2	1	2	2	2	22122	NA	NA	NA
MAD_Dr_004_182213	Dr.109341	2	1	XM_001923704.1 ; ENSDART00000078235	0	1	73470	NA	NA	NA	ENSDARG00000055831	100005456	NA	Dr.109341	im:7144297	im:7144297	hypothetical protein LOC100005456	ZDB-GENE-100922-82	si:dkey-182g1.6	2	2	1	2	2	2	22122	22	8770878	8778904
MAD_Dr_004_184081	OTTDART00000024516	0	-	-	0	1	76371	NA	NA	NA	ENSDARG00000056015	559921	NA	NA	NA	NA	NA	ZDB-GENE-050812-1	hoxb13a	2	2	1	2	2	2	22122	3	23523685	23525286
MAD_Dr_004_185448	OTTDART00000014128	1	1	XM_001923870.1	0	1	78466	NA	NA	NA	ENSDARG00000092497	8388607	NA	NA	NA	NA	NA	ZDB-GENE-050208-385	si:dkey-1b17.8	2	2	1	2	2	2	22122	NA	NA	NA
MAD_Dr_004_185451	OTTDART00000025078	0	-	-	0	1	78474	NA	NA	NA	ENSDARG00000054562	359836	NA	NA	NA	NA	NA	ZDB-GENE-030707-2	her15.1	2	2	1	2	2	2	22122	11	41370367	41371807
MAD_Dr_004_187211	OTTDART00000023485 ; ENSDART00000099969	2	0	Dr.154451 ; OTTDART00000045266	0	1	81005	NA	NA	NA	ENSDARG00000095497	8388607	NA	NA	NA	NA	NA	ZDB-GENE-061009-49	si:dkeyp-2e4.5	2	2	1	2	2	2	22122	13	44694671	44697991
MAD_Dr_004_190306	OTTDART00000011240	1	1	ENSDART00000033332	0	1	89070	NA	NA	NA	ENSDARG00000011673	8388607	NA	NA	NA	NA	NA	NA	NA	2	2	1	2	2	2	22122	22	14120733	14136532
MAD_Dr_004_193655	OTTDART00000014350	1	1	XM_001346200.2	0	1	93668	NA	NA	NA	ENSDARG00000079189	569389	NA	NA	NA	NA	si:ch211-213a13.9; si:ch211-213a13.6; novel NACHT domain containing protein; similar to novel NACHT domain containing protein	NA	NA	2	2	1	2	2	2	22122	NA	NA	NA
MAD_Dr_004_193700	ENSDART00000112845	1	1	Dr.120624	0	1	93730	NA	NA	NA	ENSDARG00000077138	792613	NA	NA	NA	NA	hypothetical LOC792613	ZDB-GENE-081022-190	zgc:195173	2	2	1	2	2	2	22122	24	33365234	33370583
MAD_Dr_004_194913	ENSDART00000113214	4	0	OTTDART00000035985 ; XM_001919250.1 ; NM_001139482.1 ; NM_001139481.1	0	1	95105	NA	NA	NA	ENSDARG00000079079	100196920	NA	NA	NA	NA	novel protein similar to cytosolic sulfotransferase family; sulfotransferase family 1, cytosolic sulfotransferase 7	ZDB-GENE-081105-102	si:ch211-196g2.6	2	2	1	2	2	2	22122	8	46320209	46449354
MAD_Dr_004_199211	ENSDART00000044678	1	1	XM_696201.3	0	1	99533	NA	NA	NA	ENSDARG00000034011	-	NA	NA	NA	NA	NA	NA	NA	2	2	1	2	2	2	22122	14	2969718	3094752
MAD_Dr_004_500723	Dr.314	3	1	gi|500723 ; gi|172122 ; gi|160784	1	1	-2	NA	NA	NA	ENSDARG00000038386	30466	NA	Dr.314	ascl1a	achaete-scute complex-like 1a (Drosophila)	achaete-scute complex-like 1a (Drosophila)	ZDB-GENE-980526-90	ascl1a	2	2	1	2	2	2	22122	4	17428135	17430217
MAD_Dr_004_501059	ENSDART00000016386	2	1	gi|501059 ; gi|171763	1	1	-2	NA	NA	NA	ENSDARG00000020084	-	NA	NA	NA	NA	thyroglobulin	ZDB-GENE-030519-1	tg	2	2	1	2	2	2	22122	16	31572835	31640844
MAD_Dr_004_502225	ENSDART00000102486	5	0	gi|502225 ; gi|155795 ; gi|145661 ; gi|145653 ; gi|504127	1	1	-2	NA	NA	NA	ENSDARG00000021633	445130	NA	NA	NA	NA	zgc:100896	ZDB-GENE-040801-27	sh3bgr	2	2	1	2	2	2	22122	15	5936000	5980821
MAD_Dr_004_103949	OTTDART00000008169 ; OTTDART00000009860	1	0	Dr.140304	0	1	104070	NA	NA	NA	ENSDARG00000041433	562950	NA	NA	NA	NA	si:dkey-7c18.24	ZDB-GENE-041014-63	si:dkey-7c18.24	2	2	1	2	2	2	22122	20	46135871	46139685
MAD_Dr_004_156535	XM_686712.3 ; OTTDART00000017210	0	1		0	1	34646	XM_686712.3	XM_686712	NA	ENSDARG00000062688	563348	NA	NA	NA	NA	NA	ZDB-GENE-060503-106	gpnmb	2	2	1	2	2	2	22122	19	20664347	20685855
MAD_Dr_004_168142	ENSDART00000018144	1	1	XM_678968.3	0	1	51155	NA	NA	NA	ENSDARG00000011830	556216	NA	NA	NA	NA	si:dkey-57m7.1	ZDB-GENE-050420-347	fgd4a	2	2	1	2	2	2	22122	NA	NA	NA
MAD_Dr_004_177484	NM_001135145.1	1	1	ENSDART00000113018	0	1	65366	NM_001135145.1	NM_001135145	zgc:195212	ENSDARG00000075203	100189619	zgc:195212	NA	NA	NA	zgc:195212	ZDB-GENE-081022-196	zgc:195212	2	2	1	2	2	2	22122	14	44333624	44342129
MAD_Dr_004_189083	OTTDART00000022912	0	-	-	0	1	87057	NA	NA	NA	ENSDARG00000079497	541345	NA	NA	NA	NA	NA	ZDB-GENE-050320-36	zgc:110340	2	2	1	2	2	2	22122	5	27266496	27267504
MAD_Dr_004_106790	OTTDART00000029009	1	1	Dr.82163	0	1	106990	NA	NA	NA	ENSDARG00000004925	445299	NA	NA	NA	NA	IMP2 inner mitochondrial membrane peptidase-like (S. cerevisiae)	ZDB-GENE-040808-9	immp2l	2	2	1	2	1	2	22121	25	21200522	21409915
MAD_Dr_004_161641	OTTDART00000017880	1	1	ENSDART00000103855	0	1	41807	NA	NA	NA	ENSDARG00000011506	555969	NA	NA	NA	NA	NA	ZDB-GENE-060503-915	lpcat1	2	2	1	2	1	2	22121	19	28706989	28749941
MAD_Dr_004_141134	OTTDART00000022101	3	0	XM_001341410.2 ; ENSDART00000045767 ; ENSDART00000078671	0	1	140680	NA	NA	NA	ENSDARG00000029688	30671	NA	NA	NA	NA	heat shock cognate 70-kd protein, like; MCM5 minichromosome maintenance deficient 5 (S. cerevisiae); heat shock cognate 70-kd protein; zgc:174006; similar to heat shock protein 8	ZDB-GENE-990415-91	hsp70.1	2	2	1	2	1	2	22121	3	25981914	25984688
MAD_Dr_004_148745	OTTDART00000012584 ; ENSDART00000005778	4	1	Dr.89282 ; XM_001336490.2 ; Dr.152747 ; XM_001919815.1	0	1	22795	NA	NA	NA	ENSDARG00000012738	796219	NA	NA	NA	NA	hypothetical protein LOC796219; novel protein with a Zinc knuckle domain	ZDB-GENE-060503-319	zcchc14	2	2	1	2	1	2	22121	NA	NA	NA
MAD_Dr_004_150200	OTTDART00000002449 ; OTTDART00000002450	3	0	Dr.32496 ; NM_001044954.1 ; ENSDART00000001804	0	1	24721	NA	NA	NA	ENSDARG00000001558	30453	NA	NA	NA	NA	kinesin family member C1; kinesin family member C1-like	ZDB-GENE-000208-21	kifc1	2	2	1	2	1	2	22121	19	7072045	7081678
MAD_Dr_004_163981	ENSDART00000109899	1	1	OTTDART00000020680	0	1	45064	NA	NA	NA	ENSDARG00000037517	323482	NA	NA	NA	NA	solute carrier family 35, member C2	ZDB-GENE-030131-2202	slc35c2	2	2	1	2	1	2	22121	23	20505045	20585611
MAD_Dr_004_169284	ENSDART00000025487	3	1	Dr.85453 ; NM_001017618.1 ; OTTDART00000039052	0	1	52842	NA	NA	NA	ENSDARG00000020241	550281	NA	NA	NA	NA	isoprenylcysteine carboxyl methyltransferase	ZDB-GENE-050417-90	icmt	2	2	1	2	1	2	22121	23	21565600	21572423
MAD_Dr_004_177520	OTTDART00000027626	0	-	-	0	1	65419	NA	NA	NA	ENSDARG00000038186	492461	NA	NA	NA	NA	NA	ZDB-GENE-041114-14	zgc:103564	2	2	1	2	1	2	22121	3	22204482	22210558
MAD_Dr_004_124134	OTTDART00000005224	6	0	OTTDART00000031860 ; XM_001345477.2 ; XM_001333624.2 ; Dr.86692 ; Dr.126074 ; OTTDART00000031965	0	1	124647	NA	NA	NA	ENSDARG00000094102	-	NA	NA	NA	NA	NA	ZDB-GENE-040724-273	si:dkey-100h21.2	2	2	1	2	1	2	22121	20	20131295	20135704
MAD_Dr_004_168448	OTTDART00000029706	0	-	-	0	1	51617	NA	NA	NA	ENSDARG00000053744	563259	NA	NA	NA	NA	NA	ZDB-GENE-051113-124	dcdc2b	2	2	1	2	1	2	22121	13	33173737	33184308
MAD_Dr_004_197703	ENSDART00000073452	1	0	Dr.29194	0	1	98009	NA	NA	NA	ENSDARG00000077456	100333895	NA	NA	NA	NA	zgc:110216	ZDB-GENE-050320-42	zgc:110216	2	2	1	2	1	2	22121	25	35777315	35778185
MAD_Dr_004_100185	NM_001007784.1	1	1	Dr.88049	0	1	100238	NM_001007784.1	NM_001007784	crygn1	ENSDARG00000087437	493629	crystallin, gamma N1	NA	NA	NA	crystallin, gamma N1	ZDB-GENE-050225-1	crygn1	2	2	1	1	2	2	22112	NA	NA	NA
MAD_Dr_004_101477	OTTDART00000040110	0	-	-	0	1	101567	NA	NA	NA	ENSDARG00000051957	352913	NA	NA	NA	NA	selenoprotein M	ZDB-GENE-030410-4	selm	2	2	1	1	2	2	22112	5	68505720	68515198
MAD_Dr_004_171664	OTTDART00000028815	0	-	-	0	1	56606	NA	NA	NA	ENSDARG00000058062	324944	NA	NA	NA	NA	NA	ZDB-GENE-030131-3667	magt1	2	2	1	1	2	2	22112	14	12064361	12085492
MAD_Dr_004_141539	ENSDART00000110579 ; ENSDART00000113697	0	1		0	1	141053	NA	NA	NA	ENSDARG00000077012	79380	NA	NA	NA	NA	eukaryotic translation initiation factor 4e 1a	ZDB-GENE-040413-1	eif4ea	2	2	1	1	2	2	22112	14	43165490	43174504
MAD_Dr_004_186583	OTTDART00000006406	1	1	ENSDART00000048375	0	1	80155	NA	NA	NA	ENSDARG00000030106	406710	NA	NA	NA	NA	stathmin-like 4	ZDB-GENE-040426-2732	stmn4	2	2	1	1	2	2	22112	20	34870767	34965935
MAD_Dr_004_179767	ENSDART00000078031	2	1	NM_213135.1 ; OTTDART00000027073	0	1	68957	NA	NA	NA	ENSDARG00000055643	406409	NA	NA	NA	NA	cytochrome b5 type A (microsomal)	ZDB-GENE-040426-2148	cyb5a	2	2	1	1	2	2	22112	NA	NA	NA
MAD_Dr_004_177475	NM_001098746.1 ; Dr.82671	2	0	ENSDART00000046934 ; OTTDART00000024838	0	1	65351	NM_001098746.1	NM_001098746	coq9	ENSDARG00000023583	567716	coenzyme Q9 homolog (S. cerevisiae)	Dr.82671	coq9	coenzyme Q9 homolog (S. cerevisiae)	si:ch211-51l3.4	ZDB-GENE-061207-37	coq9	2	2	1	1	2	2	22112	25	14285005	14301881
MAD_Dr_004_196518	NM_001002481.1	1	0	NM_001030271.1	0	1	96821	NM_001002481.1	NM_001002481	zgc:92869	ENSDARG00000027984	436754	zgc:92869	NA	NA	NA	zgc:92869	ZDB-GENE-040718-184	gstz1	2	2	1	1	2	2	22112	17	44992659	45000078
MAD_Dr_004_118255	OTTDART00000032542	1	0	Dr.111075	0	1	118818	NA	NA	NA	ENSDARG00000094290	-	NA	NA	NA	NA	NA	ZDB-GENE-070705-198	si:ch211-8o18.1	2	2	1	1	2	2	22112	5	59095531	59106890
MAD_Dr_004_151995	OTTDART00000022747	0	-	-	0	1	27125	NA	NA	NA	ENSDARG00000029372	567599	NA	NA	NA	NA	NA	ZDB-GENE-060526-349	rasa4	2	2	1	1	2	2	22112	5	58608687	58718291
MAD_Dr_004_100237	OTTDART00000023293	0	-	-	0	1	100287	NA	NA	NA	ENSDARG00000095282	-	NA	NA	NA	NA	NA	ZDB-GENE-060526-56	si:ch211-15o14.2	2	2	1	1	2	2	22112	5	43772015	43773851
MAD_Dr_004_110536	Dr.133502 ; Dr.153174 ; ENSDART00000097136	20	1	Dr.70709 ; XM_001338538.2 ; ENSDART00000101550 ; ENSDART00000106541 ; Dr.108789 ; NM_001114477.1 ; ENSDART00000106261 ; Dr.152321 ; NM_001013332.1 ; XM_001923270.1 ; XR_045171.1 ; ENSDART00000106449 ; XM_001918630.1 ; Dr.149263 ; OTTDART00000028781 ; ENSDART00000101354 ; ENSDART00000106428 ; NM_001045247.1 ; ENSDART00000081778 ; ENSDART00000097135	0	1	110826	NA	NA	NA	ENSDARG00000092093	100334938	NA	Dr.133502	NA	NA	zgc:158517	ZDB-GENE-050913-134	zgc:113443	2	2	1	1	1	2	22111	NA	NA	NA
MAD_Dr_004_115449	OTTDART00000037842	1	1	OTTDART00000037841	0	1	115883	NA	NA	NA	ENSDARG00000059983	562478	NA	NA	NA	NA	NA	ZDB-GENE-070209-211	zufsp	2	2	1	1	1	2	22111	16	32230455	32242741
MAD_Dr_004_120656	NM_001003570.1 ; Dr.3619	2	1	OTTDART00000019209 ; ENSDART00000047461	0	1	12109	NM_001003570.1	NM_001003570	mfsd2ab	ENSDARG00000035909	445176	major facilitator superfamily domain containing 2a	Dr.3619	mfsd2ab	major facilitator superfamily domain containing 2a	major facilitator superfamily domain containing 2b	ZDB-GENE-040801-89	mfsd2ab	2	2	1	1	1	2	22111	19	31280532	31296741
MAD_Dr_004_500549	Dr.151227	5	0	gi|500549 ; gi|155969 ; gi|142487 ; gi|142362 ; gi|193824	1	1	-2	NA	NA	NA	ENSDARG00000069893	-	NA	Dr.151227	NA	NA	NA	NA	NA	2	2	1	1	1	2	22111	16	32182142	32191984
MAD_Dr_004_148340	OTTDART00000036938	3	1	ENSDART00000012743 ; Dr.7298 ; NM_199877.2	0	1	22242	NA	NA	NA	ENSDARG00000003167	792689	NA	NA	NA	NA	NA	ZDB-GENE-030131-6176	mlst8	2	2	1	1	1	2	22111	12	18421909	18438665
MAD_Dr_004_163310	OTTDART00000028911	0	-	-	0	1	44146	NA	NA	NA	ENSDARG00000052113	550460	NA	NA	NA	NA	NA	ZDB-GENE-050417-283	hexa	2	2	1	1	1	2	22111	25	22119175	22143764
MAD_Dr_004_164064	OTTDART00000042381	1	1	XM_695792.3	0	1	45200	NA	NA	NA	ENSDARG00000013524	572114	NA	NA	NA	NA	NA	ZDB-GENE-090312-107	cyp2ae1	2	2	1	1	1	2	22111	23	42679165	42828743
MAD_Dr_004_170063	ENSDART00000057697	5	0	ENSDART00000057257 ; OTTDART00000037946 ; OTTDART00000037922 ; Dr.12713 ; NM_200935.1	0	1	54194	NA	NA	NA	ENSDARG00000039490	393909	NA	NA	NA	NA	phosphatidylinositol transfer protein, alpha	ZDB-GENE-040426-744	pitpnaa	2	2	1	1	1	2	22111	15	28477788	28492135
MAD_Dr_004_166598	ENSDART00000092393	1	1	OTTDART00000044928	0	1	48952	NA	NA	NA	ENSDARG00000063313	569736	NA	NA	NA	NA	phospholipase B domain containing 1	ZDB-GENE-050411-22	plbd1	2	2	1	1	1	2	22111	3	3955039	3999334
MAD_Dr_004_172123	NM_001033744.1	1	1	OTTDART00000042120	0	1	57342	NM_001033744.1	NM_001033744	adal	ENSDARG00000012986	619263	adenosine deaminase-like	NA	NA	NA	hypothetical LOC100002362; adenosine deaminase-like	ZDB-GENE-050913-145	adal	2	2	1	1	1	2	22111	25	20451268	20477205
MAD_Dr_004_175483	ENSDART00000112079	0	-	-	0	1	62374	NA	NA	NA	ENSDARG00000077396	559420	NA	NA	NA	NA	zgc:175098	ZDB-GENE-080204-81	tlcd2	2	2	1	1	1	2	22111	15	25462862	25499820
MAD_Dr_004_501099	ENSDART00000021286	8	0	gi|501099 ; gi|161108 ; gi|151221 ; gi|149799 ; gi|149571 ; gi|175119 ; gi|174232 ; gi|167655	1	1	-2	NA	NA	NA	ENSDARG00000008835	-	NA	NA	NA	NA	si:dkey-46g23.5	ZDB-GENE-030131-9306	si:dkey-46g23.5	2	2	1	1	1	2	22111	3	3619979	3665840
MAD_Dr_004_198028	ENSDART00000058806	2	1	XM_001344785.2 ; ENSDART00000111975	0	1	98343	NA	NA	NA	ENSDARG00000070516	-	NA	NA	NA	NA	NA	ZDB-GENE-110411-46	si:dkeyp-52c3.2	2	2	1	1	1	2	22111	3	1911879	1912909
MAD_Dr_004_163645	ENSDART00000104353 ; NM_001135631.1 ; Dr.133593	0	1		0	1	4461	NM_001135631.1	NM_001135631	atp2b1b	ENSDARG00000007788	561190	ATPase, Ca++ transporting, plasma membrane 1b	Dr.133593	atp2b1b	ATPase, Ca++ transporting, plasma membrane 1b	ATPase, Ca++ transporting, plasma membrane 1b	ZDB-GENE-080409-1	atp2b1b	2	2	1	1	1	2	22111	25	19511762	19568156
MAD_Dr_004_155383	OTTDART00000008052 ; ENSDART00000067486 ; NM_001045095.1 ; Dr.152421 ; NM_001044838.2	0	1		0	1	3290	NM_001045095.1	NM_001045095	si:ch211-222h17.4	ENSDARG00000045911	566016	si:ch211-222h17.4	Dr.152421	si:ch211-222h17.4	si:ch211-222h17.4	si:ch211-222h17.4	ZDB-GENE-060503-215	tulp4a	2	2	1	1	1	2	22111	4	317903	340476
MAD_Dr_004_154253	OTTDART00000029535	1	0	ENSDART00000076004	0	1	30694	NA	NA	NA	ENSDARG00000053890	402997	NA	NA	NA	NA	NA	ZDB-GENE-040426-1837	tmem62	2	1	3	3	3	3	21333	17	37306121	37333728
MAD_Dr_004_175012	OTTDART00000028652	0	-	-	0	1	61610	NA	NA	NA	ENSDARG00000008014	556651	NA	NA	NA	NA	NA	ZDB-GENE-050913-50	nudt17	2	1	3	3	3	3	21333	16	43097070	43107743
MAD_Dr_004_176793	NM_205725.2 ; Dr.86791	0	1		0	1	64329	NM_205725.2	NM_205725	lman2la	ENSDARG00000018865	403038	lectin, mannose-binding 2-like a	Dr.86791	lman2la	lectin, mannose-binding 2-like a	lectin, mannose-binding 2-like a	ZDB-GENE-040715-4	lman2la	2	1	3	3	3	3	21333	NA	NA	NA
MAD_Dr_004_504926	XM_001338104.1	2	1	gi|504926 ; gi|136072	1	1	-2	XM_001338104.1	XM_001338104	NA	ENSDARG00000077856	797669	NA	NA	NA	NA	similar to chemokine CCL-CUc	NA	NA	2	1	3	3	3	3	21333	NA	NA	NA
MAD_Dr_004_153383	OTTDART00000022132	0	-	-	0	1	29215	NA	NA	NA	ENSDARG00000016059	405821	NA	NA	NA	NA	NA	ZDB-GENE-040426-2593	rab5b	2	1	3	3	2	3	21332	9	27939771	27965887
MAD_Dr_004_170974	OTTDART00000042539	4	0	OTTDART00000026920 ; ENSDART00000087899 ; NM_001099237.2 ; Dr.80174	0	1	55466	NA	NA	NA	ENSDARG00000017439	553214	NA	NA	NA	NA	eukaryotic translation initiation factor 4Ba	ZDB-GENE-060629-1	eif4ba	2	1	3	3	2	3	21332	23	10461918	10514486
MAD_Dr_004_153334	ENSDART00000007091	0	-	-	0	1	29080	NA	NA	NA	ENSDARG00000016112	570583	NA	NA	NA	NA	NA	ZDB-GENE-070626-3	bbs12	2	1	3	2	3	3	21323	14	1342084	1349806
MAD_Dr_004_501456	ENSDART00000058053	5	0	gi|501456 ; gi|175902 ; gi|175893 ; gi|183774 ; gi|180779	1	1	-2	NA	NA	NA	ENSDARG00000039716	-	NA	NA	NA	NA	zgc:113102	NA	NA	2	1	3	2	3	3	21323	NA	NA	NA
MAD_Dr_004_189205	ENSDART00000106389	7	0	XM_001922452.1 ; ENSDART00000051025 ; OTTDART00000027216 ; XM_001922859.1 ; NM_001109863.1 ; Dr.141179 ; Dr.133974	0	1	87468	NA	NA	NA	ENSDARG00000088820	-	NA	NA	NA	NA	zgc:110249	NA	NA	2	1	3	2	3	3	21323	3	501122	530462
MAD_Dr_004_143293	ENSDART00000023163	3	0	OTTDART00000024612 ; Dr.5024 ; NM_201652.1	0	1	15507	NA	NA	NA	ENSDARG00000019614	322209	NA	NA	NA	NA	PHD finger protein 16	ZDB-GENE-030131-928	jade3	2	1	3	2	2	3	21322	6	37500871	37535239
MAD_Dr_004_154069	XM_686296.3 ; Dr.87154	0	1		0	1	30469	XM_686296.3	XM_686296	NA	ENSDARG00000076835	562931	NA	Dr.87154	NA	NA	similar to ANKRD13D protein	NA	NA	2	1	3	2	2	3	21322	NA	NA	NA
MAD_Dr_004_155284	OTTDART00000037865	4	0	Dr.88464 ; XM_001343367.2 ; Dr.125835 ; NM_001017775.2	0	1	32624	NA	NA	NA	ENSDARG00000022176	550472	NA	NA	NA	NA	similar to opioid binding protein/cell adhesion molecule-like; zgc:110372	ZDB-GENE-050417-297	zgc:110372	2	1	3	2	2	3	21322	16	50876567	50960056
MAD_Dr_004_178760	ENSDART00000075421	2	0	NM_001172419.1 ; Dr.115770	0	1	67476	NA	NA	NA	ENSDARG00000053405	570613	NA	NA	NA	NA	hypothetical LOC570613; sorbitol dehydrogenase	ZDB-GENE-040426-1231	sord	2	1	3	2	2	3	21322	7	30652133	30654880
MAD_Dr_004_502558	ENSDART00000109975	4	0	gi|502558 ; gi|185942 ; gi|199536 ; gi|111287	1	1	-2	NA	NA	NA	ENSDARG00000071456	100124600	NA	NA	NA	NA	zgc:171660; si:ch211-234p6.8	ZDB-GENE-060503-787	si:ch211-234p6.7	2	1	3	2	2	3	21322	24	38249610	38304106
MAD_Dr_004_503712	OTTDART00000012516	6	0	gi|503712 ; gi|503711 ; gi|502558 ; gi|185942 ; gi|111287 ; gi|199536	1	1	-2	NA	NA	NA	ENSDARG00000071457	797437	NA	NA	NA	NA	zgc:171660; si:ch211-234p6.8	ZDB-GENE-060503-881	crp6	2	1	3	2	2	3	21322	24	38242707	38243484
MAD_Dr_004_188445	NM_205659.1 ; Dr.29783 ; ENSDART00000050018	0	1		0	1	8302	NM_205659.1	NM_205659	cnksr1	ENSDARG00000032932	402957	connector enhancer of kinase suppressor of Ras 1	Dr.29783	cnksr1	connector enhancer of kinase suppressor of Ras 1	connector enhancer of kinase suppressor of Ras 1	ZDB-GENE-040426-1802	cnksr1	2	1	3	2	1	3	21321	17	26972140	27030146
MAD_Dr_004_172645	ENSDART00000099084	3	0	OTTDART00000020743 ; OTTDART00000019501 ; OTTDART00000019502	0	1	58123	NA	NA	NA	ENSDARG00000068503	387303	NA	NA	NA	NA	globoside alpha-1,3-N-acetylgalactosaminyltransfer	ZDB-GENE-031204-4	gbgt1l4	2	1	3	1	3	3	21313	5	23264582	23301587
MAD_Dr_004_132690	OTTDART00000028204	1	1	OTTDART00000028203	0	1	132277	NA	NA	NA	ENSDARG00000056862	393574	NA	NA	NA	NA	centrosomal protein 63; similar to centrosomal protein 63	ZDB-GENE-040426-1154	cep63	2	1	3	1	1	3	21311	6	27906072	27934909
MAD_Dr_004_154419	OTTDART00000018815	1	1	Dr.119403	0	1	30953	NA	NA	NA	ENSDARG00000018000	8388607	NA	NA	NA	NA	NA	ZDB-GENE-060503-870	ubp1	2	1	3	1	1	3	21311	19	43237375	43272452
MAD_Dr_004_143558	OTTDART00000037575	0	-	-	0	1	15846	NA	NA	NA	ENSDARG00000056986	337795	NA	NA	NA	NA	NA	ZDB-GENE-030131-9975	dact2	2	1	3	1	1	3	21311	13	43266618	43273374
MAD_Dr_004_142143	ENSDART00000109607 ; ENSDART00000108546 ; ENSDART00000052083 ; ENSDART00000112164	1	1	XM_001337564.2	0	1	141618	NA	NA	NA	ENSDARG00000035873	-	NA	NA	NA	NA	NA	NA	NA	2	1	2	3	3	3	21233	7	49526399	49528121
MAD_Dr_004_175466	OTTDART00000036850	2	1	Dr.76195 ; NM_001083546.2	0	1	6234	NA	NA	NA	ENSDARG00000061123	557186	NA	NA	NA	NA	aldehyde dehydrogenase 18 family, member A1	ZDB-GENE-030131-5602	aldh18a1	2	1	2	3	3	3	21233	NA	NA	NA
MAD_Dr_004_172171	OTTDART00000036673	0	-	-	0	1	57412	NA	NA	NA	ENSDARG00000052527	8388607	NA	NA	NA	NA	NA	ZDB-GENE-050208-236	mul1b	2	1	2	3	3	3	21233	23	37184880	37189154
MAD_Dr_004_170317	Dr.87186	5	0	ENSDART00000093153 ; XM_001923639.1 ; Dr.151905 ; NM_001160823.1 ; OTTDART00000016741	0	1	54552	NA	NA	NA	ENSDARG00000063625	503869	NA	Dr.87186	btc	betacellulin, epidermal growth factor family membe	similar to betacellulin, epidermal growth factor family member; betacellulin, epidermal growth factor family member	ZDB-GENE-050311-1	btc	2	1	2	3	2	3	21232	NA	NA	NA
MAD_Dr_004_167550	ENSDART00000079160	1	1	OTTDART00000029035	0	1	50290	NA	NA	NA	ENSDARG00000056638	436823	NA	NA	NA	NA	pirin	ZDB-GENE-040718-288	pir	2	1	2	3	2	3	21232	11	29670439	29689581
MAD_Dr_004_178915	NM_001002205.1	2	0	ENSDART00000076478 ; OTTDART00000002044	0	1	67701	NM_001002205.1	NM_001002205	dhrs1	ENSDARG00000054300	368670	dehydrogenase/reductase (SDR family) member 1	NA	NA	NA	dehydrogenase/reductase (SDR family) member 1	ZDB-GENE-030616-591	dhrs1	2	1	2	3	2	3	21232	2	38279420	38287347
MAD_Dr_004_105073	OTTDART00000038096	1	1	OTTDART00000038095	0	1	105221	NA	NA	NA	ENSDARG00000062614	561673	NA	NA	NA	NA	NA	ZDB-GENE-060929-596	nars2	2	1	2	2	3	3	21223	NA	NA	NA
MAD_Dr_004_105782	OTTDART00000037710	0	-	-	0	1	10598	NA	NA	NA	ENSDARG00000077469	325603	NA	NA	NA	NA	zgc:66298	ZDB-GENE-040426-1598	polr1b	2	1	2	2	3	3	21223	13	41791636	41814507
MAD_Dr_004_148547	ENSDART00000109006 ; ENSDART00000044812	1	1	XM_001341191.2	0	1	22542	NA	NA	NA	ENSDARG00000079457	100001169	NA	NA	NA	NA	similar to RIKEN cDNA 2310003H01	ZDB-GENE-130603-100	si:dkey-57h18.1	2	1	2	2	3	3	21223	12	26447501	26455888
MAD_Dr_004_171304	ENSDART00000087410	3	1	OTTDART00000038797 ; Dr.17409 ; NM_001082887.1	0	1	56033	NA	NA	NA	ENSDARG00000061348	792614	NA	NA	NA	NA	adenosine deaminase, tRNA-specific 1	ZDB-GENE-070410-64	adat1	2	1	2	2	3	3	21223	25	34306080	34328524
MAD_Dr_004_178234	NM_001002615.1 ; Dr.86108 ; OTTDART00000018779 ; ENSDART00000006338	0	1		0	1	66576	NM_001002615.1	NM_001002615	mterfd1	ENSDARG00000003207	436888	MTERF domain containing 1	Dr.86108	mterfd1	MTERF domain containing 1	MTERF domain containing 1	ZDB-GENE-040718-359	mterf3	2	1	2	2	3	3	21223	19	44462984	44470008
MAD_Dr_004_182516	NM_001002517.1 ; Dr.75251	2	0	ENSDART00000008761 ; OTTDART00000028005	0	1	73925	NM_001002517.1	NM_001002517	arl6ip5b	ENSDARG00000016238	436790	ADP-ribosylation factor-like 6 interacting protein	Dr.75251	arl6ip5b	ADP-ribosylation factor-like 6 interacting protein	zgc:92811	ZDB-GENE-040718-223	arl6ip5b	2	1	2	2	3	3	21223	23	4315056	4320811
MAD_Dr_004_198908	OTTDART00000029065	1	0	Dr.88939	0	1	99224	NA	NA	NA	ENSDARG00000039671	450072	NA	NA	NA	NA	asparagine-linked glycosylation 14 homolog (S. cerevisiae)	ZDB-GENE-041010-195	alg14	2	1	2	2	3	3	21223	NA	NA	NA
MAD_Dr_004_199413	ENSDART00000010322	1	1	OTTDART00000037222	0	1	99780	NA	NA	NA	ENSDARG00000019595	565126	NA	NA	NA	NA	zgc:153043	ZDB-GENE-060929-1186	senp8	2	1	2	2	3	3	21223	7	56529470	56534132
MAD_Dr_004_502391	ENSDART00000106285	4	0	gi|502391 ; gi|107337 ; gi|100115 ; gi|103325	1	1	-2	NA	NA	NA	ENSDARG00000071733	555734	NA	NA	NA	NA	NA	NA	NA	2	1	2	2	3	3	21223	12	9472634	9479138
MAD_Dr_004_100696	NM_001006038.1 ; XM_001330946.1 ; ENSDART00000089978 ; ENSDART00000057945	1	0	Dr.91379	0	1	100777	NM_001006038.1	NM_001006038	zgc:103433	ENSDARG00000039642	450017	zgc:103433	NA	NA	NA	hypothetical LOC791921; zgc:103433	ZDB-GENE-041010-133	atp6v0e1	2	1	2	2	2	2	21222	NA	NA	NA
MAD_Dr_004_101667	ENSDART00000010143	1	1	Dr.115431	0	1	101760	NA	NA	NA	ENSDARG00000017606	336339	NA	NA	NA	NA	NA	ZDB-GENE-030131-8283	sys1	2	1	2	2	2	2	21222	6	54430247	54436821
MAD_Dr_004_102618	OTTDART00000009607	1	1	Dr.24294	0	1	102753	NA	NA	NA	ENSDARG00000068996	386920	NA	NA	NA	NA	similar to Histone H4 replacement CG3379-PC; similar to predicted protein; similar to histone cluster 1, H2bc; similar to histone cluster 1, H2bb; similar to histone cluster 2, H2be; hypothetical LOC562547; zgc:154164; zgc:165555; zgc:112234; hypothetical LOC564216; zgc:173585; histone 2, H2, like; zgc:173587; zgc:194989; zgc:171937; histone 1, H4, like; hypothetical LOC100004665; hypothetical LO…	ZDB-GENE-031118-36	hist2h2l	2	1	2	2	2	2	21222	10	29929304	29930127
MAD_Dr_004_103260	NM_001039993.1	0	-	-	0	1	103399	NM_001039993.1	NM_001039993	zgc:136925	ENSDARG00000069852	664765	zgc:136925	NA	NA	NA	zgc:136925	ZDB-GENE-060312-18	lipt2	2	1	2	2	2	2	21222	15	4964392	4978796
MAD_Dr_004_107889	OTTDART00000040527 ; XM_685953.2	0	1		0	1	108040	XM_685953.2	XM_685953	NA	ENSDARG00000078163	562573	NA	NA	NA	NA	NA	ZDB-GENE-090313-378	hpse2	2	1	2	2	2	2	21222	13	40377595	40542385
MAD_Dr_004_119224	NM_001045448.1	5	1	ENSDART00000087842 ; OTTDART00000037878 ; OTTDART00000037881 ; OTTDART00000037880 ; OTTDART00000037879	0	1	119658	NM_001045448.1	NM_001045448	nxt2	ENSDARG00000061527	751738	nuclear transport factor 2-like export factor 2	NA	NA	NA	nuclear transport factor 2-like export factor 2	ZDB-GENE-050521-1	nxt2	2	1	2	2	2	2	21222	14	28153476	28158003
MAD_Dr_004_115811	Dr.76051	0	-	-	0	1	116234	NA	NA	NA	ENSDARG00000068265	497181	NA	Dr.76051	tomm5	translocase of outer mitochondrial membrane 5 homo	translocase of outer mitochondrial membrane 5 homolog (yeast)	ZDB-GENE-040724-90	tomm5	2	1	2	2	2	2	21222	14	44312795	44316182
MAD_Dr_004_116718	OTTDART00000004946	0	-	-	0	1	11724	NA	NA	NA	ENSDARG00000005789	562399	NA	NA	NA	NA	NA	ZDB-GENE-040724-172	enpp1	2	1	2	2	2	2	21222	20	13507301	13625030
MAD_Dr_004_117007	OTTDART00000044640	2	1	Dr.79864 ; XM_001919306.1	0	1	11755	NA	NA	NA	ENSDARG00000079167	-	NA	NA	NA	NA	NA	NA	NA	2	1	2	2	2	2	21222	24	26234400	26284643
MAD_Dr_004_117059	ENSDART00000110429	3	0	ENSDART00000113238 ; Dr.123624 ; Dr.124342	0	1	117605	NA	NA	NA	ENSDARG00000078423	793726	NA	NA	NA	NA	zgc:194297	ZDB-GENE-081022-97	zgc:194285	2	1	2	2	2	2	21222	14	46609291	46613303
MAD_Dr_004_182637	NM_201070.1	0	-	-	0	1	74083	NM_201070.1	NM_201070	zgc:56533	ENSDARG00000002002	394045	zgc:56533	NA	NA	NA	zgc:56533	ZDB-GENE-040426-1067	lmcd1	2	1	2	2	2	2	21222	22	39110327	39121442
MAD_Dr_004_123134	ENSDART00000064150	1	1	OTTDART00000009944	0	1	123609	NA	NA	NA	ENSDARG00000043687	797937	NA	NA	NA	NA	si:ch211-59d15.9	ZDB-GENE-041014-27	si:ch211-59d15.9	2	1	2	2	2	2	21222	20	9136630	9290735
MAD_Dr_004_180735	ENSDART00000059321 ; ENSDART00000112977	1	1	OTTDART00000040349	0	1	70413	NA	NA	NA	ENSDARG00000040534	-	NA	NA	NA	NA	NA	NA	NA	2	1	2	2	2	2	21222	13	8508749	8511340
MAD_Dr_004_127111	OTTDART00000029221	0	-	-	0	1	12717	NA	NA	NA	ENSDARG00000033444	692287	NA	NA	NA	NA	NA	ZDB-GENE-060512-339	map4k6	2	1	2	2	2	2	21222	21	33999090	34040617
MAD_Dr_004_127949	ENSDART00000085124	2	1	NM_001077723.1 ; OTTDART00000038942	0	1	12794	NA	NA	NA	ENSDARG00000060430	777615	NA	NA	NA	NA	zgc:152894	ZDB-GENE-061103-208	zfyve28	2	1	2	2	2	2	21222	17	43575090	43604326
MAD_Dr_004_142715	ENSDART00000080496	6	1	XM_001921535.1 ; OTTDART00000026335 ; Dr.77267 ; OTTDART00000026364 ; OTTDART00000026363 ; OTTDART00000026365	0	1	14750	NA	NA	NA	ENSDARG00000057702	337685	NA	NA	NA	NA	O-linked N-acetylglucosamine (GlcNAc) transferase	ZDB-GENE-030131-9631	ogt.1	2	1	2	2	2	2	21222	NA	NA	NA
MAD_Dr_004_134061	ENSDART00000009172	0	-	-	0	1	133654	NA	NA	NA	ENSDARG00000016934	-	NA	NA	NA	NA	NA	ZDB-GENE-040718-193	ttyh2	2	1	2	2	2	2	21222	12	38388639	38513090
MAD_Dr_004_136450	OTTDART00000025695	0	-	-	0	1	1360	NA	NA	NA	ENSDARG00000011027	30705	NA	NA	NA	NA	NA	ZDB-GENE-980526-255	fgfr1a	2	1	2	2	2	2	21222	8	51444068	51537939
MAD_Dr_004_140639	XM_682083.1 ; ENSDART00000111688	16	0	Dr.132802 ; ENSDART00000110490 ; OTTDART00000027842 ; NM_001109705.1 ; Dr.31771 ; Dr.132816 ; NM_001113659.1 ; ENSDART00000110396 ; OTTDART00000027843 ; Dr.119168 ; ENSDART00000044238 ; Dr.114377 ; OTTDART00000027817 ; ENSDART00000003994 ; Dr.114374 ; Dr.151333	0	1	140219	XM_682083.1	XM_682083	NA	ENSDARG00000079846	100006428	NA	NA	NA	NA	NA	NA	NA	2	1	2	2	2	2	21222	NA	NA	NA
MAD_Dr_004_141452	ENSDART00000113596 ; ENSDART00000114347	0	1		0	1	140972	NA	NA	NA	ENSDARG00000073813	100333370	NA	NA	NA	NA	NA	ZDB-GENE-080204-30	scly	2	1	2	2	2	2	21222	6	27285155	27298428
MAD_Dr_004_142861	NM_001083025.1 ; Dr.106889	0	1		0	1	14949	NM_001083025.1	NM_001083025	pcsk7	ENSDARG00000069968	100009656	proprotein convertase subtilisin/kexin type 7	Dr.106889	pcsk7	proprotein convertase subtilisin/kexin type 7	hypothetical LOC567363; proprotein convertase subtilisin/kexin type 7	ZDB-GENE-030131-7293	pcsk7	2	1	2	2	2	2	21222	15	557335	583010
MAD_Dr_004_149747	ENSDART00000012091	1	1	OTTDART00000026578	0	1	24104	NA	NA	NA	ENSDARG00000014017	30740	NA	NA	NA	NA	ribonucleotide reductase M1 polypeptide	ZDB-GENE-990415-247	rrm1	2	1	2	2	2	2	21222	21	30735348	30750719
MAD_Dr_004_145825	OTTDART00000042226	0	-	-	0	1	18799	NA	NA	NA	ENSDARG00000095241	8388607	NA	NA	NA	NA	NA	ZDB-GENE-980526-529	mybl2a	2	1	2	2	2	2	21222	23	4409364	4418867
MAD_Dr_004_146108	ENSDART00000114691	2	1	Dr.22467 ; XM_686925.3	0	1	19133	NA	NA	NA	ENSDARG00000074326	100333576	NA	NA	NA	NA	NA	ZDB-GENE-120927-1	mcm8	2	1	2	2	2	2	21222	17	4167568	4207427
MAD_Dr_004_146501	NM_001014365.1 ; Dr.85873	1	1	ENSDART00000045433	0	1	19626	NM_001014365.1	NM_001014365	eya4	ENSDARG00000012397	541552	eyes absent homolog 4 (Drosophila)	Dr.85873	eya4	eyes absent homolog 4 (Drosophila)	eyes absent homolog 4 (Drosophila)	ZDB-GENE-050327-93	eya4	2	1	2	2	2	2	21222	23	31513113	31586036
MAD_Dr_004_147934	OTTDART00000042093	0	-	-	0	1	21680	NA	NA	NA	ENSDARG00000006603	378726	NA	NA	NA	NA	NA	ZDB-GENE-030909-4	csrp1a	2	1	2	2	2	2	21222	23	5831542	5885020
MAD_Dr_004_149295	ENSDART00000062349	3	1	Dr.78117 ; XM_684719.2 ; OTTDART00000023027	0	1	23512	NA	NA	NA	ENSDARG00000042520	-	NA	NA	NA	NA	NA	NA	NA	2	1	2	2	2	2	21222	5	66795750	66820910
MAD_Dr_004_148342	ENSDART00000026592	0	-	-	0	1	22244	NA	NA	NA	ENSDARG00000008461	322854	NA	NA	NA	NA	anaphase promoting complex subunit 5	ZDB-GENE-030131-1574	anapc5	2	1	2	2	2	2	21222	8	40152702	40171278
MAD_Dr_004_148860	NM_001162507.1 ; ENSDART00000074116 ; OTTDART00000029393	2	1	Dr.48575 ; NM_001033592.1	0	1	22948	NM_001162507.1	NM_001162507	NA	ENSDARG00000052290	619200	NA	NA	NA	NA	zgc:114080; hypothetical LOC572060	ZDB-GENE-050809-122	rab33ba	2	1	2	2	2	2	21222	14	47190232	47196803
MAD_Dr_004_150268	NM_200170.1	1	0	XM_688438.3	0	1	24803	NM_200170.1	NM_200170	actr10	ENSDARG00000038432	393139	actin-related protein 10 homolog (S. cerevisiae)	NA	NA	NA	actin-related protein 10 homolog (S. cerevisiae); hypothetical LOC565140	ZDB-GENE-040426-768	actr10	2	1	2	2	2	2	21222	20	54404821	54417308
MAD_Dr_004_153083	ENSDART00000109418	1	1	OTTDART00000037433	0	1	28727	NA	NA	NA	ENSDARG00000003974	558170	NA	NA	NA	NA	speckle-type POZ protein-like b	ZDB-GENE-061103-277	spoplb	2	1	2	2	2	2	21222	11	33555377	33580480
MAD_Dr_004_150882	ENSDART00000032390	0	-	-	0	1	25662	NA	NA	NA	ENSDARG00000026701	447857	NA	NA	NA	NA	zgc:92126	ZDB-GENE-040912-164	gtf2h1	2	1	2	2	2	2	21222	25	3071111	3091371
MAD_Dr_004_151830	NM_199333.1 ; Dr.79861	0	1		0	1	26898	NM_199333.1	NM_199333	pkm2a	ENSDARG00000003933	335817	pyruvate kinase, muscle, a	Dr.79861	pkm2a	pyruvate kinase, muscle, a	pyruvate kinase, muscle, a	ZDB-GENE-031201-4	pkma	2	1	2	2	2	2	21222	NA	NA	NA
MAD_Dr_004_152102	OTTDART00000035382	1	1	ENSDART00000064325	0	1	27303	NA	NA	NA	ENSDARG00000089142	541480	NA	NA	NA	NA	NA	ZDB-GENE-050327-3	zgc:113119	2	1	2	2	2	2	21222	4	74873981	74883735
MAD_Dr_004_152802	OTTDART00000044202	0	-	-	0	1	28283	NA	NA	NA	ENSDARG00000075369	-	NA	NA	NA	NA	NA	ZDB-GENE-090317-1	nck1b	2	1	2	2	2	2	21222	24	3315723	3435257
MAD_Dr_004_154862	XM_001921872.1 ; Dr.119801	2	1	OTTDART00000043972 ; ENSDART00000058311	0	1	3157	XM_001921872.1	XM_001921872	NA	ENSDARG00000002020	561835	NA	Dr.119801	NA	NA	similar to rapamycin-insensitive companion of mTOR	ZDB-GENE-070810-5	rictorb	2	1	2	2	2	2	21222	21	21158843	21205766
MAD_Dr_004_155656	NM_001008642.1	0	-	-	0	1	33451	NM_001008642.1	NM_001008642	ephx2	ENSDARG00000040255	494099	epoxide hydrolase 2, cytoplasmic	NA	NA	NA	epoxide hydrolase 2, cytoplasmic	ZDB-GENE-041212-70	ephx2	2	1	2	2	2	2	21222	17	5859013	5918854
MAD_Dr_004_155840	XM_684355.2	0	-	-	0	1	33702	XM_684355.2	XM_684355	NA	ENSDARG00000059636	-	NA	NA	NA	NA	NA	NA	NA	2	1	2	2	2	2	21222	5	56257350	56273316
MAD_Dr_004_156032	OTTDART00000026926	0	-	-	0	1	33958	NA	NA	NA	ENSDARG00000058358	797433	NA	NA	NA	NA	NA	ZDB-GENE-030411-5	krt8	2	1	2	2	2	2	21222	23	10314656	10319318
MAD_Dr_004_156937	NM_001014361.1 ; Dr.43296	3	1	OTTDART00000005126 ; ENSDART00000026239 ; OTTDART00000005127	0	1	35252	NM_001014361.1	NM_001014361	eif2b4	ENSDARG00000014004	541548	eukaryotic translation initiation factor 2B, subun	Dr.43296	im:7137635	im:7137635	eukaryotic translation initiation factor 2B, subunit 4 delta	ZDB-GENE-030131-955	eif2b4	2	1	2	2	2	2	21222	20	19617071	19632956
MAD_Dr_004_160654	OTTDART00000028038 ; ENSDART00000006925	3	0	ENSDART00000081144 ; Dr.77060 ; NM_001025165.1	0	1	40489	NA	NA	NA	ENSDARG00000033440	503783	NA	NA	NA	NA	methionyl aminopeptidase 1	ZDB-GENE-050626-124	metap1	2	1	2	2	2	2	21222	13	12474346	12715114
MAD_Dr_004_158609	OTTDART00000025712 ; ENSDART00000103980 ; NM_213497.2	1	0	Dr.5660	0	1	37660	NM_213497.2	NM_213497	crip2	ENSDARG00000070670	554826	cysteine-rich protein 2	NA	NA	NA	cysteine-rich protein 2	ZDB-GENE-040426-2889	crip2	2	1	2	2	2	2	21222	17	37497940	37527104
MAD_Dr_004_157884	XM_001923377.1	0	-	-	0	1	3658	XM_001923377.1	XM_001923377	NA	ENSDARG00000059681	572183	NA	NA	NA	NA	phosphorylase kinase, alpha 1 (muscle)	ZDB-GENE-031118-56	phka1	2	1	2	2	2	2	21222	NA	NA	NA
MAD_Dr_004_158109	OTTDART00000027710	0	-	-	0	1	36917	NA	NA	NA	ENSDARG00000007916	573360	NA	NA	NA	NA	NA	ZDB-GENE-040426-2076	xpnpep3	2	1	2	2	2	2	21222	3	24928954	24956438
MAD_Dr_004_158291	OTTDART00000038593	0	-	-	0	1	37192	NA	NA	NA	ENSDARG00000073988	556663	NA	NA	NA	NA	NA	ZDB-GENE-070820-8	mntb	2	1	2	2	2	2	21222	21	39417462	39467648
MAD_Dr_004_159022	ENSDART00000022724	3	1	OTTDART00000026741 ; Dr.109210 ; XM_683572.3	0	1	38269	NA	NA	NA	ENSDARG00000017612	402868	NA	NA	NA	NA	pyridoxine 5'-phosphate oxidase	ZDB-GENE-060602-2	pnpo	2	1	2	2	2	2	21222	12	28685086	28692282
MAD_Dr_004_159296	ENSDART00000026766	0	-	-	0	1	38642	NA	NA	NA	ENSDARG00000019702	369193	NA	NA	NA	NA	aldolase C, fructose-bisphosphate, b	ZDB-GENE-030821-1	aldocb	2	1	2	2	2	2	21222	21	39585912	39616539
MAD_Dr_004_159750	NM_198208.1	1	0	Dr.77606	0	1	39260	NM_198208.1	NM_198208	tfdp2	ENSDARG00000042835	338204	transcription factor Dp-2	NA	NA	NA	transcription factor Dp-2	ZDB-GENE-030219-104	tfdp2	2	1	2	2	2	2	21222	15	4430650	4537240
MAD_Dr_004_159992	NM_001001834.2	1	0	OTTDART00000025354	0	1	39605	NM_001001834.2	NM_001001834	ift52	ENSDARG00000045025	414931	intraflagellar transport protein 52	NA	NA	NA	intraflagellar transport protein 52	ZDB-GENE-040614-3	ift52	2	1	2	2	2	2	21222	11	1506509	1519427
MAD_Dr_004_160506	ENSDART00000093277	1	1	OTTDART00000038723	0	1	40293	NA	NA	NA	ENSDARG00000063684	768291	NA	NA	NA	NA	zgc:153678	ZDB-GENE-061027-190	ppm1h	2	1	2	2	2	2	21222	25	1511319	1544329
MAD_Dr_004_160678	OTTDART00000002448	4	0	ENSDART00000075070 ; OTTDART00000002447 ; Dr.12595 ; NM_131867.1	0	1	40516	NA	NA	NA	ENSDARG00000053097	140427	NA	NA	NA	NA	NA	ZDB-GENE-011128-1	hsf2	2	1	2	2	2	2	21222	20	40578466	40590174
MAD_Dr_004_161940	OTTDART00000031068	0	-	-	0	1	42256	NA	NA	NA	ENSDARG00000020595	442932	NA	NA	NA	NA	NA	ZDB-GENE-040723-1	gnl3l	2	1	2	2	2	2	21222	11	25248158	25264875
MAD_Dr_004_163821	ENSDART00000104303	3	0	OTTDART00000024484 ; Dr.76448 ; NM_173240.1	0	1	44851	NA	NA	NA	ENSDARG00000070828	192313	NA	NA	NA	NA	actin-like 6A	ZDB-GENE-020419-36	actl6a	2	1	2	2	2	2	21222	6	29396167	29405143
MAD_Dr_004_162267	XM_685073.3 ; Dr.119294	0	1		0	1	42750	XM_685073.3	XM_685073	NA	ENSDARG00000062976	561664	NA	Dr.119294	iffo1	intermediate filament family orphan 1	intermediate filament family orphan 1; similar to HOM-TES-103 tumor antigen	ZDB-GENE-060503-418	iffo1a	2	1	2	2	2	2	21222	19	9562773	9584548
MAD_Dr_004_501106	ENSDART00000021925	3	1	gi|501106 ; gi|162433 ; gi|162431	1	1	-2	NA	NA	NA	ENSDARG00000031651	563580	NA	NA	NA	NA	zgc:113383	ZDB-GENE-050913-138	slc29a1a	2	1	2	2	2	2	21222	NA	NA	NA
MAD_Dr_004_162775	NM_199689.1 ; Dr.17474	2	1	ENSDART00000052349 ; OTTDART00000036840	0	1	43477	NM_199689.1	NM_199689	ogfod1	ENSDARG00000036061	324573	2-oxoglutarate and iron-dependent oxygenase domain	Dr.17474	ogfod1	2-oxoglutarate and iron-dependent oxygenase domain	2-oxoglutarate and iron-dependent oxygenase domain containing 1	ZDB-GENE-030131-3294	ogfod1	2	1	2	2	2	2	21222	7	28825044	28838312
MAD_Dr_004_164005	ENSDART00000038929	2	1	Dr.76073 ; NM_001076743.1	0	1	45097	NA	NA	NA	ENSDARG00000028415	767776	NA	NA	NA	NA	zgc:153924	ZDB-GENE-060929-812	zgc:153924	2	1	2	2	2	2	21222	NA	NA	NA
MAD_Dr_004_168474	ENSDART00000063961	1	1	OTTDART00000027399	0	1	51645	NA	NA	NA	ENSDARG00000043566	550343	NA	NA	NA	NA	si:dkey-22a1.3	ZDB-GENE-030131-5651	si:dkey-22a1.3	2	1	2	2	2	2	21222	9	27570572	27581162
MAD_Dr_004_163379	ENSDART00000112665	1	1	XM_682225.3	0	1	44235	NA	NA	NA	ENSDARG00000074590	-	NA	NA	NA	NA	NA	ZDB-GENE-100405-4	wdpcp	2	1	2	2	2	2	21222	17	24312560	24421271
MAD_Dr_004_163701	OTTDART00000025100	0	-	-	0	1	44688	NA	NA	NA	ENSDARG00000069283	449811	NA	NA	NA	NA	NA	ZDB-GENE-041010-60	ercc8	2	1	2	2	2	2	21222	8	16702570	16721573
MAD_Dr_004_181501	ENSDART00000023325	1	1	OTTDART00000029348	0	1	72199	NA	NA	NA	ENSDARG00000007181	445071	NA	NA	NA	NA	zgc:92417	ZDB-GENE-040801-202	nadk2	2	1	2	2	2	2	21222	21	22293348	22310098
MAD_Dr_004_163872	ENSDART00000110441 ; XM_681206.3 ; Dr.39734	0	1		0	1	44922	XM_681206.3	XM_681206	NA	ENSDARG00000075530	560242	NA	Dr.39734	wu:fb79e06	wu:fb79e06	wu:fb79e06	ZDB-GENE-100629-1	pigu	2	1	2	2	2	2	21222	6	50711841	50731557
MAD_Dr_004_164562	OTTDART00000026760	0	-	-	0	1	45926	NA	NA	NA	ENSDARG00000013236	494102	NA	NA	NA	NA	NA	ZDB-GENE-041212-73	dhcr24	2	1	2	2	2	2	21222	20	7159221	7186931
MAD_Dr_004_180024	ENSDART00000064215	1	1	OTTDART00000024201	0	1	69354	NA	NA	NA	ENSDARG00000043732	325592	NA	NA	NA	NA	COP9 constitutive photomorphogenic homolog subunit	ZDB-GENE-030131-4317	cops4	2	1	2	2	2	2	21222	10	11397646	11410238
MAD_Dr_004_166757	NM_213325.1 ; Dr.132196	2	0	ENSDART00000043938 ; NM_213071.1	0	1	49166	NM_213325.1	NM_213325	tram2	ENSDARG00000078807	406344	translocation associated membrane protein 2	Dr.132196	tram2	translocation associated membrane protein 2	zgc:193538; translocation associated membrane protein 2	ZDB-GENE-040426-2024	tram2	2	1	2	2	2	2	21222	5	24580585	24583492
MAD_Dr_004_192300	OTTDART00000043357	1	1	OTTDART00000043356	0	1	91808	NA	NA	NA	ENSDARG00000015971	394101	NA	NA	NA	NA	NA	ZDB-GENE-040426-1001	rapgef1b	2	1	2	2	2	2	21222	21	3951798	4059004
MAD_Dr_004_168556	OTTDART00000027095	3	1	ENSDART00000023654 ; Dr.33964 ; NM_001003537.1	0	1	51766	NA	NA	NA	ENSDARG00000019963	445143	NA	NA	NA	NA	sideroflexin 1	ZDB-GENE-040801-45	sfxn1	2	1	2	2	2	2	21222	14	50090849	50122523
MAD_Dr_004_168576	NM_001004602.1	0	-	-	0	1	51794	NM_001004602.1	NM_001004602	bin1	ENSDARG00000058820	447863	bridging integrator 1	NA	NA	NA	bridging integrator 1	ZDB-GENE-030425-1	bin1b	2	1	2	2	2	2	21222	6	6842318	6895426
MAD_Dr_004_168825	ENSDART00000109211	3	1	Dr.82806 ; XM_001339844.2 ; OTTDART00000044090	0	1	5214	NA	NA	NA	ENSDARG00000079257	-	NA	NA	NA	NA	gem (nuclear organelle) associated protein 5	ZDB-GENE-031112-9	gemin5	2	1	2	2	2	2	21222	21	36711584	36754890
MAD_Dr_004_169087	NM_200123.1 ; Dr.79024	1	0	ENSDART00000008920	0	1	52537	NM_200123.1	NM_200123	zgc:63565	ENSDARG00000014340	386994	zgc:63565	Dr.79024	zgc:63565	zgc:63565	zgc:63565	ZDB-GENE-031118-188	rab11al	2	1	2	2	2	2	21222	16	46758371	46775063
MAD_Dr_004_189048	OTTDART00000041222	3	0	ENSDART00000111671 ; Dr.85012 ; NM_001111238.1	0	1	86888	NA	NA	NA	ENSDARG00000075754	8388607	NA	NA	NA	NA	NA	ZDB-GENE-080204-109	mri1	2	1	2	2	2	2	21222	1	54513499	54532968
MAD_Dr_004_169841	ENSDART00000040793	1	1	OTTDART00000026759	0	1	53865	NA	NA	NA	ENSDARG00000039684	436878	NA	NA	NA	NA	sirtuin (silent mating type information regulation	ZDB-GENE-040718-349	sirt5	2	1	2	2	2	2	21222	20	7062991	7079733
MAD_Dr_004_170723	ENSDART00000029067	0	-	-	0	1	55106	NA	NA	NA	ENSDARG00000028517	554137	NA	NA	NA	NA	zgc:112297	ZDB-GENE-050522-414	hbp1	2	1	2	2	2	2	21222	25	3325980	3345373
MAD_Dr_004_171377	ENSDART00000067600	0	-	-	0	1	56139	NA	NA	NA	ENSDARG00000045983	557590	NA	NA	NA	NA	si:rp71-14i8.2	ZDB-GENE-060526-378	zbtb43	2	1	2	2	2	2	21222	5	4497505	4507679
MAD_Dr_004_171382	NM_200184.1 ; Dr.79374	1	1	ENSDART00000041677	0	1	56147	NM_200184.1	NM_200184	serpine2	ENSDARG00000029353	393153	serine (or cysteine) proteinase inhibitor, clade E	Dr.79374	serpine2	serine (or cysteine) proteinase inhibitor, clade E	serine (or cysteine) proteinase inhibitor, clade E (nexin, plasminogen activator inhibitor type 1), member 2; zgc:158605	ZDB-GENE-040426-848	serpine2	2	1	2	2	2	2	21222	15	43360809	43403043
MAD_Dr_004_171476	ENSDART00000010543	2	1	Dr.84279 ; NM_001002316.1	0	1	56310	NA	NA	NA	ENSDARG00000008490	436587	NA	NA	NA	NA	hypothetical protein LOC100150741; LTV1 homolog (S. cerevisiae)	ZDB-GENE-040712-1	ltv1	2	1	2	2	2	2	21222	1	53205934	53220896
MAD_Dr_004_172945	ENSDART00000081445	0	-	-	0	1	58590	NA	NA	NA	ENSDARG00000058563	402829	NA	NA	NA	NA	NA	ZDB-GENE-110411-166	ubox5	2	1	2	2	2	2	21222	8	1052585	1068202
MAD_Dr_004_173990	OTTDART00000045028 ; ENSDART00000080247	0	1		0	1	60123	NA	NA	NA	ENSDARG00000057550	8388607	NA	NA	NA	NA	zgc:193699	ZDB-GENE-060810-140	trim105	2	1	2	2	2	2	21222	NA	NA	NA
MAD_Dr_004_174130	OTTDART00000026826	0	-	-	0	1	60312	NA	NA	NA	ENSDARG00000058560	796450	NA	NA	NA	NA	NA	ZDB-GENE-040426-905	adrm1	2	1	2	2	2	2	21222	23	9626021	9632336
MAD_Dr_004_500373	Dr.134592	4	1	gi|503458 ; gi|500373 ; gi|178868 ; gi|174415	1	1	-2	NA	NA	NA	ENSDARG00000010169	403145	NA	Dr.134592	myd88	myeloid differentiation primary response gene (88)	myeloid differentiation primary response gene (88)	ZDB-GENE-040219-3	myd88	2	1	2	2	2	2	21222	24	20044495	20048577
MAD_Dr_004_174637	NM_001110391.1 ; Dr.111273	2	0	ENSDART00000087148 ; OTTDART00000042473	0	1	61065	NM_001110391.1	NM_001110391	cbln4	ENSDARG00000061240	563847	cerebellin 4 precursor	Dr.111273	cbln4	cerebellin 4 precursor	cerebellin 4 precursor	ZDB-GENE-080204-58	cbln4	2	1	2	2	2	2	21222	23	38023604	38042886
MAD_Dr_004_174716	NM_200014.1 ; Dr.8435	2	1	ENSDART00000049748 ; ENSDART00000084858	0	1	61188	NM_200014.1	NM_200014	chmp1b	ENSDARG00000035548	336426	chromatin modifying protein 1B	Dr.8435	chmp1b	chromatin modifying protein 1B	zgc:56134	ZDB-GENE-030131-8370	chmp1b	2	1	2	2	2	2	21222	NA	NA	NA
MAD_Dr_004_175513	ENSDART00000029649	0	-	-	0	1	62420	NA	NA	NA	ENSDARG00000021555	550328	NA	NA	NA	NA	Parkinson disease (autosomal recessive, juvenile)	ZDB-GENE-050417-109	park2	2	1	2	2	2	2	21222	13	3219977	3383257
MAD_Dr_004_175678	OTTDART00000043190	0	-	-	0	1	62651	NA	NA	NA	ENSDARG00000056653	387528	NA	NA	NA	NA	NA	ZDB-GENE-031219-1	fhl1b	2	1	2	2	2	2	21222	10	26636305	26659325
MAD_Dr_004_175685	NM_001163988.1	0	-	-	0	1	62675	NM_001163988.1	NM_001163988	prmt6	ENSDARG00000069706	-	protein arginine methyltransferase 6	NA	NA	NA	protein arginine methyltransferase 6	ZDB-GENE-040914-7	prmt6	2	1	2	2	2	2	21222	24	29278178	29279660
MAD_Dr_004_176417	NM_001017726.1 ; Dr.87159	1	1	ENSDART00000016800	0	1	63768	NM_001017726.1	NM_001017726	znf367	ENSDARG00000021086	550421	zinc finger protein 367	Dr.87159	znf367	zinc finger protein 367	zinc finger protein 367	ZDB-GENE-050417-231	znf367	2	1	2	2	2	2	21222	8	1144725	1154072
MAD_Dr_004_176524	NM_200231.1	0	-	-	0	1	63923	NM_200231.1	NM_200231	wdr45	ENSDARG00000090219	393200	WD repeat domain 45	NA	NA	NA	WD repeat domain 45	ZDB-GENE-040426-990	wdr45	2	1	2	2	2	2	21222	10	42933725	42947651
MAD_Dr_004_177281	XM_001921018.1 ; Dr.150510	0	1		0	1	65069	XM_001921018.1	XM_001921018	NA	ENSDARG00000086245	-	NA	Dr.150510	NA	NA	NA	NA	NA	2	1	2	2	2	2	21222	14	49956563	49973299
MAD_Dr_004_178526	OTTDART00000040785 ; ENSDART00000077775	2	1	Dr.83323 ; XM_692291.3	0	1	6700	NA	NA	NA	ENSDARG00000055429	568932	NA	NA	NA	NA	NA	ZDB-GENE-000607-52	kat6b	2	1	2	2	2	2	21222	13	24739339	24779741
MAD_Dr_004_179013	NM_001080655.1	1	1	ENSDART00000091647	0	1	67856	NM_001080655.1	NM_001080655	zgc:158748	ENSDARG00000062986	791173	zgc:158748	NA	NA	NA	zgc:158748	ZDB-GENE-070112-1812	pnpla7a	2	1	2	2	2	2	21222	21	13517511	13565556
MAD_Dr_004_180486	NM_200945.2	2	1	ENSDART00000065338 ; Dr.35443	0	1	70016	NM_200945.2	NM_200945	zgc:56683	ENSDARG00000044488	336470	zgc:56683	NA	NA	NA	zgc:56683	ZDB-GENE-030131-8414	pak1ip1	2	1	2	2	2	2	21222	24	36270673	36287293
MAD_Dr_004_179234	OTTDART00000028251	0	-	-	0	1	68205	NA	NA	NA	ENSDARG00000019907	447872	NA	NA	NA	NA	NA	ZDB-GENE-040912-35	dscc1	2	1	2	2	2	2	21222	16	14681888	14697212
MAD_Dr_004_181085	OTTDART00000021475	0	-	-	0	1	71297	NA	NA	NA	ENSDARG00000013931	334626	NA	NA	NA	NA	NA	ZDB-GENE-040426-2643	eif3m	2	1	2	2	2	2	21222	18	45648403	45661122
MAD_Dr_004_181476	ENSDART00000078373	0	-	-	0	1	72150	NA	NA	NA	ENSDARG00000055969	259256	NA	NA	NA	NA	replication factor C (activator 1) 3	ZDB-GENE-020809-3	rfc3	2	1	2	2	2	2	21222	10	34080393	34089605
MAD_Dr_004_181871	ENSDART00000109495	0	-	-	0	1	72912	NA	NA	NA	ENSDARG00000077537	794545	NA	NA	NA	NA	zgc:194225	ZDB-GENE-081022-80	nudt19	2	1	2	2	2	2	21222	7	38257935	38261478
MAD_Dr_004_181965	ENSDART00000113109	2	0	ENSDART00000076815 ; OTTDART00000034374	0	1	73032	NA	NA	NA	ENSDARG00000069701	654828	NA	NA	NA	NA	leucine-rich repeat LGI family, member 2b	ZDB-GENE-060217-3	lgi2b	2	1	2	2	2	2	21222	1	39305567	39310786
MAD_Dr_004_182209	NM_001135579.1	0	-	-	0	1	73466	NM_001135579.1	NM_001135579	NA	ENSDARG00000076744	100190889	NA	NA	NA	NA	hypothetical protein LOC100190889	ZDB-GENE-081104-358	si:dkey-206d17.5	2	1	2	2	2	2	21222	NA	NA	NA
MAD_Dr_004_183342	OTTDART00000036992	0	-	-	0	1	75241	NA	NA	NA	ENSDARG00000056954	568385	NA	NA	NA	NA	NA	ZDB-GENE-081104-62	si:dkeyp-38g8.5	2	1	2	2	2	2	21222	4	16326716	16330786
MAD_Dr_004_183732	XM_691850.3	0	-	-	0	1	75849	XM_691850.3	XM_691850	NA	ENSDARG00000075627	568517	NA	NA	NA	NA	wu:fb10b08	ZDB-GENE-041111-196	abhd10b	2	1	2	2	2	2	21222	24	21782013	21789056
MAD_Dr_004_501159	ENSDART00000028457	4	1	gi|501159 ; gi|183839 ; gi|183832 ; gi|122320	1	1	-2	NA	NA	NA	ENSDARG00000025132	406309	NA	NA	NA	NA	similar to translocase of outer mitochondrial membrane 20 homolog; translocase of outer mitochondrial membrane 20 homolog (yeast)	ZDB-GENE-040426-1976	tomm20a	2	1	2	2	2	2	21222	NA	NA	NA
MAD_Dr_004_184402	ENSDART00000057471	0	-	-	0	1	76807	NA	NA	NA	ENSDARG00000039329	100329381	NA	NA	NA	NA	NA	ZDB-GENE-130530-603	gpr180	2	1	2	2	2	2	21222	NA	NA	NA
MAD_Dr_004_184901	ENSDART00000011192	1	1	ENSDART00000097245	0	1	77628	NA	NA	NA	ENSDARG00000091402	415150	NA	NA	NA	NA	eukaryotic translation initiation factor 2B, subun	ZDB-GENE-040625-25	eif2b1	2	1	2	2	2	2	21222	5	68866490	68876492
MAD_Dr_004_185165	ENSDART00000054803	0	-	-	0	1	78048	NA	NA	NA	ENSDARG00000037628	503604	NA	NA	NA	NA	zgc:113138	ZDB-GENE-050227-16	trpt1	2	1	2	2	2	2	21222	14	6823374	6835141
MAD_Dr_004_186221	ENSDART00000045750	0	-	-	0	1	79597	NA	NA	NA	ENSDARG00000032896	497122	NA	NA	NA	NA	x globin	ZDB-GENE-050125-1	xgb	2	1	2	2	2	2	21222	17	1885949	1907657
MAD_Dr_004_195719	ENSDART00000108855	3	1	OTTDART00000040562 ; Dr.117604 ; XM_699807.3	0	1	95991	NA	NA	NA	ENSDARG00000078389	558440	NA	NA	NA	NA	NA	ZDB-GENE-090312-190	si:dkey-188i13.7	2	1	2	2	2	2	21222	13	37497386	37505202
MAD_Dr_004_186688	ENSDART00000056519	0	-	-	0	1	80306	NA	NA	NA	ENSDARG00000038700	100007673	NA	NA	NA	NA	NA	ZDB-GENE-081022-189	gpr160	2	1	2	2	2	2	21222	2	37312631	37313702
MAD_Dr_004_186899	Dr.80623 ; ENSDART00000015670	1	1	NM_199741.1	0	1	80583	NA	NA	NA	ENSDARG00000016318	326098	NA	Dr.80623	med7	mediator complex subunit 7	mediator complex subunit 7	ZDB-GENE-030131-4823	med7	2	1	2	2	2	2	21222	14	33723935	33725623
MAD_Dr_004_186967	OTTDART00000044843	3	0	XM_680535.3 ; ENSDART00000110772 ; ENSDART00000114875	0	1	80688	NA	NA	NA	ENSDARG00000092882	-	NA	NA	NA	NA	NA	ZDB-GENE-091204-391	si:dkey-161j23.7	2	1	2	2	2	2	21222	24	39698854	39715551
MAD_Dr_004_188900	NM_200260.1 ; Dr.7975	0	1		0	1	8570	NM_200260.1	NM_200260	ppp4r1	ENSDARG00000042781	393230	protein phosphatase 4, regulatory subunit 1	Dr.7975	ppp4r1	protein phosphatase 4, regulatory subunit 1	protein phosphatase 4, regulatory subunit 1	ZDB-GENE-040426-753	ppp4r1	2	1	2	2	2	2	21222	NA	NA	NA
MAD_Dr_004_189200	NM_001007319.1 ; Dr.37620	1	0	ENSDART00000009217	0	1	8746	NM_001007319.1	NM_001007319	zgc:92172	ENSDARG00000011072	492353	zgc:92172	Dr.37620	zgc:92172	zgc:92172	zgc:92172	ZDB-GENE-041114-191	ddx11	2	1	2	2	2	2	21222	18	6362076	6394151
MAD_Dr_004_189517	Dr.86086	3	1	ENSDART00000114134 ; ENSDART00000111147 ; NM_001003413.1	0	1	87996	NA	NA	NA	ENSDARG00000076935	335756	NA	Dr.86086	wrb	tryptophan rich basic protein	tryptophan rich basic protein	ZDB-GENE-030131-7696	wrb	2	1	2	2	2	2	21222	NA	NA	NA
MAD_Dr_004_190827	OTTDART00000024696	0	-	-	0	1	89770	NA	NA	NA	ENSDARG00000018077	791484	NA	NA	NA	NA	NA	ZDB-GENE-050421-2	rbp1	2	1	2	2	2	2	21222	2	39062698	39070965
MAD_Dr_004_191436	Dr.75265	1	0	ENSDART00000113120	0	1	9061	NA	NA	NA	ENSDARG00000079684	557363	NA	Dr.75265	wu:fa05b10	wu:fa05b10	similar to TAF6-like RNA polymerase II, p300/CBP-associated factor (PCAF)-associated factor	ZDB-GENE-030131-6789	taf6l	2	1	2	2	2	2	21222	7	17701668	17718950
MAD_Dr_004_194147	NM_200767.1	2	0	OTTDART00000025933 ; Dr.80153	0	1	94286	NM_200767.1	NM_200767	chchd2l	ENSDARG00000059304	393740	coiled-coil-helix-coiled-coil-helix domain contain	NA	NA	NA	coiled-coil-helix-coiled-coil-helix domain containing 2-like	ZDB-GENE-040426-1737	chchd2	2	1	2	2	2	2	21222	15	5785268	5792797
MAD_Dr_004_194982	ENSDART00000077200	2	1	NM_001007354.1 ; OTTDART00000029269	0	1	95178	NA	NA	NA	ENSDARG00000054916	492482	NA	NA	NA	NA	eukaryotic translation initiation factor 4E bindin	ZDB-GENE-041114-44	eif4ebp3	2	1	2	2	2	2	21222	21	26364637	26369609
MAD_Dr_004_195191	ENSDART00000100022	3	0	OTTDART00000009608 ; NM_001005967.1 ; Dr.4738	0	1	95418	NA	NA	NA	ENSDARG00000068995	449794	NA	NA	NA	NA	zgc:101846	ZDB-GENE-041010-42	zgc:101846	2	1	2	2	2	2	21222	10	29930341	29931249
MAD_Dr_004_196126	NM_001004679.1	1	1	Dr.84294	0	1	96404	NM_001004679.1	NM_001004679	zgc:103619	ENSDARG00000003132	447941	zgc:103619	NA	NA	NA	zgc:103619	ZDB-GENE-040912-128	apip	2	1	2	2	2	2	21222	7	49628690	49635865
MAD_Dr_004_501939	ENSDART00000089121	3	0	gi|501939 ; gi|188355 ; gi|170944	1	1	-2	NA	NA	NA	ENSDARG00000062008	100151174	NA	NA	NA	NA	NA	NA	NA	2	1	2	2	2	2	21222	6	26072246	26235179
MAD_Dr_004_502691	ENSDART00000111201	4	1	gi|502691 ; gi|163902 ; gi|158932 ; gi|147789	1	1	-2	NA	NA	NA	ENSDARG00000031051	-	NA	NA	NA	NA	interleukin 4 receptor	ZDB-GENE-050227-5	il4r.1	2	1	2	2	2	2	21222	NA	NA	NA
MAD_Dr_004_504726	OTTDART00000042869	2	1	gi|504726 ; gi|156050	1	1	-2	NA	NA	NA	ENSDARG00000086679	-	NA	NA	NA	NA	NA	ZDB-GENE-091204-323	si:ch211-197l9.5	2	1	2	2	2	2	21222	23	31114527	31133819
MAD_Dr_004_504784	OTTDART00000043965	6	0	gi|504784 ; gi|154174 ; gi|504783 ; gi|146052 ; gi|504782 ; gi|152481	1	1	-2	NA	NA	NA	ENSDARG00000093353	327130	NA	NA	NA	NA	NA	ZDB-GENE-030131-5341	si:ch211-263m18.4	2	1	2	2	2	2	21222	21	43656859	43660949
MAD_Dr_004_144842	ENSDART00000023090	2	0	NM_001161378.1 ; OTTDART00000020879	0	1	17546	NA	NA	NA	ENSDARG00000055313	-	NA	NA	NA	NA	NA	ZDB-GENE-060503-330	slc12a10.1	2	1	2	2	2	2	21222	7	4287322	4323078
MAD_Dr_004_116430	OTTDART00000033918	3	0	OTTDART00000022132 ; Dr.155309 ; Dr.76797	0	1	116942	NA	NA	NA	ENSDARG00000092012	-	NA	NA	NA	NA	NA	ZDB-GENE-070912-601	si:dkey-83m22.15	2	1	2	2	2	2	21222	9	32389904	32394797
MAD_Dr_004_107895	XM_686654.2 ; OTTDART00000044073	0	1		0	1	108048	XM_686654.2	XM_686654	NA	ENSDARG00000079102	-	NA	NA	NA	NA	NA	NA	NA	2	1	2	2	2	2	21222	21	37899776	37905849
MAD_Dr_004_112236	ENSDART00000049588	1	1	Dr.30811	0	1	112551	NA	NA	NA	ENSDARG00000036140	553474	NA	NA	NA	NA	zgc:136220	ZDB-GENE-070410-2	zgc:136220	2	1	2	2	2	2	21222	7	33951294	33953861
MAD_Dr_004_139200	NM_001142263.1	0	-	-	0	1	13862	NM_001142263.1	NM_001142263	disc1	ENSDARG00000021895	407621	disrupted in schizophrenia 1	NA	NA	NA	disrupted in schizophrenia 1	ZDB-GENE-090122-1	disc1	2	1	2	2	2	2	21222	13	48766403	48854203
MAD_Dr_004_140184	NM_212579.1	3	0	ENSDART00000103074 ; OTTDART00000020604 ; ENSDART00000035093	0	1	13980	NM_212579.1	NM_212579	col9a2	ENSDARG00000024492	321212	procollagen, type IX, alpha 2	NA	NA	NA	procollagen, type IX, alpha 2	ZDB-GENE-030131-9786	col9a2	2	1	2	2	2	2	21222	19	38834939	38880434
MAD_Dr_004_142392	ENSDART00000092002	2	0	Dr.118913 ; NM_001048067.2	0	1	14344	NA	NA	NA	ENSDARG00000067670	569769	NA	NA	NA	NA	protein-O-mannosyltransferase 1	ZDB-GENE-060929-966	pomt1	2	1	2	2	2	2	21222	5	50464750	50481438
MAD_Dr_004_142341	OTTDART00000044066	0	-	-	0	1	14251	NA	NA	NA	ENSDARG00000079393	-	NA	NA	NA	NA	NA	NA	NA	2	1	2	2	2	2	21222	21	34957866	35006690
MAD_Dr_004_144488	OTTDART00000040397	0	-	-	0	1	17074	NA	NA	NA	ENSDARG00000026081	402920	NA	NA	NA	NA	NA	ZDB-GENE-040806-3	lhcgr	2	1	2	2	2	2	21222	13	47283580	47329022
MAD_Dr_004_150646	OTTDART00000015500 ; NM_001123242.2 ; Dr.90346	2	1	ENSDART00000083516 ; ENSDART00000083514	0	1	25343	NM_001123242.2	NM_001123242	kcnq1	ENSDARG00000059798	557498	potassium voltage-gated channel, KQT-like subfamil	Dr.90346	kcnq1	potassium voltage-gated channel, KQT-like subfamil	potassium voltage-gated channel, KQT-like subfamil	ZDB-GENE-061214-5	kcnq1	2	1	2	2	2	2	21222	7	48282850	48384453
MAD_Dr_004_150651	ENSDART00000112692	0	-	-	0	1	25349	NA	NA	NA	ENSDARG00000077155	100003849	NA	NA	NA	NA	si:ch211-157p22.10	ZDB-GENE-060526-53	si:ch211-157p22.10	2	1	2	2	2	2	21222	5	68733542	68751261
MAD_Dr_004_150739	ENSDART00000108486	1	1	ENSDART00000114187	0	1	25478	NA	NA	NA	ENSDARG00000076326	-	NA	NA	NA	NA	NA	ZDB-GENE-130530-799	zmp:0000000796	2	1	2	2	2	2	21222	NA	NA	NA
MAD_Dr_004_154047	ENSDART00000079218	0	-	-	0	1	30444	NA	NA	NA	ENSDARG00000056690	553750	NA	NA	NA	NA	myotubularin related protein 1a	ZDB-GENE-050522-518	mtmr1a	2	1	2	2	2	2	21222	7	25587187	25605773
MAD_Dr_004_155689	ENSDART00000077823	0	-	-	0	1	33494	NA	NA	NA	ENSDARG00000055463	558559	NA	NA	NA	NA	zgc:195063	ZDB-GENE-080723-63	lrit3a	2	1	2	2	2	2	21222	14	35988136	36005166
MAD_Dr_004_155941	OTTDART00000038579	0	-	-	0	1	33841	NA	NA	NA	ENSDARG00000016789	767741	NA	NA	NA	NA	NA	ZDB-GENE-061013-229	zgc:152891	2	1	2	2	2	2	21222	21	31160600	31189350
MAD_Dr_004_156077	ENSDART00000052906	1	1	XM_001335144.2	0	1	34010	NA	NA	NA	ENSDARG00000036420	-	NA	NA	NA	NA	NA	ZDB-GENE-130530-592	zmp:0000000589	2	1	2	2	2	2	21222	7	20141283	20170713
MAD_Dr_004_169952	NM_001017876.1	0	-	-	0	1	54017	NM_001017876.1	NM_001017876	zgc:113106	ENSDARG00000079646	550574	zgc:113106	NA	NA	NA	zgc:113106	ZDB-GENE-050417-428	fsip1	2	1	2	2	2	2	21222	NA	NA	NA
MAD_Dr_004_172036	NM_001020571.1 ; OTTDART00000028850 ; ENSDART00000002459	0	1		0	1	57225	NM_001020571.1	NM_001020571	ctns	ENSDARG00000008890	553594	cystinosis, nephropathic	NA	NA	NA	cystinosis, nephropathic	ZDB-GENE-050522-352	ctns	2	1	2	2	2	2	21222	11	6284392	6296454
MAD_Dr_004_172456	OTTDART00000042674	0	-	-	0	1	57833	NA	NA	NA	ENSDARG00000094377	8388607	NA	NA	NA	NA	NA	ZDB-GENE-090312-179	samd10b	2	1	2	2	2	2	21222	23	13368008	13576786
MAD_Dr_004_174959	NM_001002492.1	1	0	OTTDART00000028443	0	1	61533	NM_001002492.1	NM_001002492	cmtm4	ENSDARG00000052020	436765	CKLF-like MARVEL transmembrane domain containing 4	NA	NA	NA	CKLF-like MARVEL transmembrane domain containing 4	ZDB-GENE-040718-195	cmtm4	2	1	2	2	2	2	21222	7	44289456	44332870
MAD_Dr_004_175564	ENSDART00000052004	0	-	-	0	1	62489	NA	NA	NA	ENSDARG00000035837	767723	NA	NA	NA	NA	zgc:153595	ZDB-GENE-060929-1030	zgc:153595	2	1	2	2	2	2	21222	12	10374166	10384112
MAD_Dr_004_177555	OTTDART00000008683	0	-	-	0	1	65514	NA	NA	NA	ENSDARG00000045765	563551	NA	NA	NA	NA	NA	ZDB-GENE-041210-88	asb13a.2	2	1	2	2	2	2	21222	4	11484512	11526039
MAD_Dr_004_179192	OTTDART00000044748	0	-	-	0	1	68144	NA	NA	NA	ENSDARG00000056294	-	NA	NA	NA	NA	NA	NA	NA	2	1	2	2	2	2	21222	24	37473369	37487542
MAD_Dr_004_185396	ENSDART00000109142	0	-	-	0	1	78389	NA	NA	NA	ENSDARG00000079659	799626	NA	NA	NA	NA	NA	ZDB-GENE-131121-294	si:ch73-39g4.3	2	1	2	2	2	2	21222	15	2534924	2544416
MAD_Dr_004_188166	ENSDART00000079080 ; ENSDART00000108942	3	1	Dr.77003 ; XM_678566.3 ; OTTDART00000002117	0	1	82574	NA	NA	NA	ENSDARG00000056563	100335011	NA	NA	NA	NA	NA	ZDB-GENE-030616-43	ppargc1b	2	1	2	2	2	2	21222	NA	NA	NA
MAD_Dr_004_190792	OTTDART00000001786	0	-	-	0	1	89721	NA	NA	NA	ENSDARG00000044672	368725	NA	NA	NA	NA	si:busm1-136d19.2	NA	NA	2	1	2	2	2	2	21222	11	36515630	36527980
MAD_Dr_004_196117	OTTDART00000039448	0	-	-	0	1	96393	NA	NA	NA	ENSDARG00000067729	-	NA	NA	NA	NA	NA	NA	NA	2	1	2	2	2	2	21222	5	40722605	40846975
MAD_Dr_004_197065	OTTDART00000034347	4	0	OTTDART00000032423 ; OTTDART00000035241 ; OTTDART00000014884 ; OTTDART00000014883	0	1	97389	NA	NA	NA	ENSDARG00000092802	-	NA	NA	NA	NA	NA	ZDB-GENE-081105-51	si:ch211-187f22.2	2	1	2	2	2	2	21222	9	18597748	18600557
MAD_Dr_004_198516	OTTDART00000024578	4	0	NM_001005958.1 ; OTTDART00000024581 ; Dr.83374 ; ENSDART00000114413	0	1	98835	NA	NA	NA	ENSDARG00000088711	326706	NA	NA	NA	NA	lectin, galactoside-binding, soluble, 1 (galectin 1)-like 1; hypothetical LOC791523; lectin, galactoside-binding, soluble, 1 (galectin 1)-like 2	ZDB-GENE-030131-4905	lgals1l1	2	1	2	2	2	2	21222	3	28808917	28815915
MAD_Dr_004_502250	ENSDART00000103222	2	0	gi|502250 ; gi|190806	1	1	-2	NA	NA	NA	ENSDARG00000070387	100329471	NA	NA	NA	NA	NA	ZDB-GENE-131127-212	si:dkey-234i14.7	2	1	2	2	2	2	21222	25	36711529	36713811
MAD_Dr_004_115384	OTTDART00000012508	1	0	ENSDART00000111979	0	1	115823	NA	NA	NA	ENSDARG00000071454	-	NA	NA	NA	NA	NA	ZDB-GENE-060503-314	crp1	2	1	2	2	2	2	21222	24	38185326	38191364
MAD_Dr_004_147481	ENSDART00000065728	2	0	Dr.7206 ; NM_199959.1	0	1	20984	NA	NA	NA	ENSDARG00000044719	335551	NA	NA	NA	NA	zgc:73062	ZDB-GENE-030131-7491	nrsn1	2	1	2	2	2	2	21222	16	330938	339684
MAD_Dr_004_155033	ENSDART00000048046	0	-	-	0	1	31798	NA	NA	NA	ENSDARG00000030156	560126	NA	NA	NA	NA	NA	ZDB-GENE-100726-2	naglu	2	1	2	2	2	2	21222	24	36415565	36428032
MAD_Dr_004_174373	NM_001161762.1	1	1	Dr.155291	0	1	60679	NM_001161762.1	NM_001161762	NA	ENSDARG00000069111	100150224	NA	NA	NA	NA	IKAROS family zinc finger 2	ZDB-GENE-100922-169	si:zfos-1425h8.1	2	1	2	2	2	2	21222	9	40149438	40213014
MAD_Dr_004_158125	NM_153656.1	0	-	-	0	1	36943	NM_153656.1	NM_153656	ptgs1	ENSDARG00000052148	246226	prostaglandin-endoperoxide synthase 1	NA	NA	NA	prostaglandin-endoperoxide synthase 1	ZDB-GENE-020530-1	ptgs1	2	1	2	2	2	2	21222	5	64226204	64265272
MAD_Dr_004_160923	OTTDART00000039271	0	-	-	0	1	4083	NA	NA	NA	ENSDARG00000071294	492655	NA	NA	NA	NA	NA	ZDB-GENE-041111-230	tonsl	2	1	2	2	2	2	21222	17	8642481	8696866
MAD_Dr_004_169479	ENSDART00000104425	3	1	Dr.31936 ; NM_213153.2 ; OTTDART00000038182	0	1	53143	NA	NA	NA	ENSDARG00000005464	792196	NA	NA	NA	NA	deoxyribonuclease I-like 3	ZDB-GENE-040426-2170	dnase1l3	2	1	2	2	2	2	21222	23	19775244	19785645
MAD_Dr_004_178906	ENSDART00000109463	4	0	ENSDART00000017155 ; NM_001077779.1 ; OTTDART00000025200 ; Dr.79156	0	1	67680	NA	NA	NA	ENSDARG00000010423	404039	NA	NA	NA	NA	nephrosin; nephrosin-like	ZDB-GENE-040420-2	npsn	2	1	2	2	2	2	21222	7	38382223	38388219
MAD_Dr_004_196720	OTTDART00000028329	0	-	-	0	1	97025	NA	NA	NA	ENSDARG00000024503	541399	NA	NA	NA	NA	NA	ZDB-GENE-050320-99	c6ast3	2	1	2	2	2	2	21222	7	38370856	38373302
MAD_Dr_004_503463	NM_212894.1	4	1	gi|503463 ; gi|196640 ; gi|191776 ; gi|102046	1	1	-2	NM_212894.1	NM_212894	lgals2a	ENSDARG00000054942	405830	lectin, galactoside-binding, soluble, 2a	NA	NA	NA	lectin, galactoside-binding, soluble, 1 (galectin 1)-like 1; hypothetical LOC791523; lectin, galactoside-binding, soluble, 1 (galectin 1)-like 2	ZDB-GENE-050318-2	lgals2a	2	1	2	2	2	2	21222	3	28808783	28829415
MAD_Dr_004_149333	ENSDART00000101054	1	1	OTTDART00000044052	0	1	23575	NA	NA	NA	ENSDARG00000056005	559928	NA	NA	NA	NA	DnaJ (Hsp40) homolog, subfamily C, member 18	ZDB-GENE-030131-8019	dnajc18	2	1	2	2	1	2	21221	21	30202854	30217490
MAD_Dr_004_152970	ENSDART00000020621	1	1	OTTDART00000035802	0	1	28565	NA	NA	NA	ENSDARG00000017681	406782	NA	NA	NA	NA	mitogen-activated protein kinase 4	ZDB-GENE-040426-2835	mapk4	2	1	2	2	1	2	21221	8	29733005	29755235
MAD_Dr_004_166527	NM_001080003.1	1	1	OTTDART00000030685	0	1	48833	NM_001080003.1	NM_001080003	si:ch211-208m1.2	ENSDARG00000060661	562805	si:ch211-208m1.2	NA	NA	NA	si:ch211-208m1.2	ZDB-GENE-070424-152	si:ch211-208m1.2	2	1	2	2	1	2	21221	21	37985520	38063512
MAD_Dr_004_168042	ENSDART00000003192	0	-	-	0	1	51012	NA	NA	NA	ENSDARG00000005034	100333162	NA	NA	NA	NA	zgc:154151	ZDB-GENE-061110-16	ispd	2	1	2	2	1	2	21221	15	34637087	34710736
MAD_Dr_004_158454	NM_001002182.1 ; Dr.83427 ; OTTDART00000028196 ; ENSDART00000017307	0	1		0	1	37431	NM_001002182.1	NM_001002182	zgc:91890	ENSDARG00000018980	431729	zgc:91890	Dr.83427	zgc:91890	zgc:91890	zgc:91890	ZDB-GENE-040704-21	zgc:91890	2	1	2	2	1	2	21221	16	5697974	5705715
MAD_Dr_004_149196	XM_683311.2	0	-	-	0	1	23383	XM_683311.2	XM_683311	NA	ENSDARG00000039065	559914	NA	NA	NA	NA	similar to transient receptor potential cation channel, subfamily C, member 2	ZDB-GENE-130530-602	trpc2a	2	1	2	2	1	2	21221	15	38426560	38460216
MAD_Dr_004_185829	OTTDART00000045428	1	1	OTTDART00000045425	0	1	79026	NA	NA	NA	ENSDARG00000093192	-	NA	NA	NA	NA	NA	ZDB-GENE-091204-181	si:ch211-198m1.1	2	1	2	1	3	3	21213	3	18786266	18817913
MAD_Dr_004_195342	NM_001003998.1	4	0	OTTDART00000029113 ; OTTDART00000029112 ; ENSDART00000044970 ; Dr.34241	0	1	95587	NM_001003998.1	NM_001003998	zgc:100789	ENSDARG00000032037	445493	zgc:100789	NA	NA	NA	hypothetical LOC792250; zgc:100789	ZDB-GENE-040822-2	bet1l	2	1	2	1	2	2	21212	25	7487182	7546563
MAD_Dr_004_110567	ENSDART00000029579	2	0	NM_001003589.1 ; Dr.31900	0	1	110856	NA	NA	NA	ENSDARG00000023003	793027	NA	NA	NA	NA	coiled-coil domain containing 12	ZDB-GENE-040801-108	ccdc12	2	1	2	1	2	2	21212	16	16621771	16646153
MAD_Dr_004_503134	NM_001002724.1	4	0	gi|503134 ; gi|116629 ; gi|124201 ; gi|114465	1	1	-2	NM_001002724.1	NM_001002724	zgc:92591	ENSDARG00000071420	436997	zgc:92591	NA	NA	NA	zgc:92591; similar to Histone H2B	ZDB-GENE-040718-483	zgc:92591	2	1	2	1	2	2	21212	NA	NA	NA
MAD_Dr_004_148674	ENSDART00000058337	1	1	XM_001921658.1	0	1	2271	NA	NA	NA	ENSDARG00000025218	565267	NA	NA	NA	NA	im:7152131	ZDB-GENE-050411-72	myo5ab	2	1	2	1	2	2	21212	25	7498393	7525644
MAD_Dr_004_154470	OTTDART00000014762	1	0	NM_205609.1	0	1	31024	NA	NA	NA	ENSDARG00000002249	792041	NA	NA	NA	NA	thromboxane A synthase 1 (platelet, cytochrome P450, family 5, subfamily A)	ZDB-GENE-030131-8805	tbxas1	2	1	2	1	2	2	21212	18	12611854	12904635
MAD_Dr_004_163826	NM_001020593.1 ; Dr.80922	1	0	ENSDART00000059800	0	1	44858	NM_001020593.1	NM_001020593	lactb	ENSDARG00000040803	553619	lactamase, beta	Dr.80922	wu:fj21e07	wu:fj21e07	lactamase, beta	ZDB-GENE-020111-1	lactb	2	1	2	1	2	2	21212	25	32770665	32780947
MAD_Dr_004_187415	NM_001024432.1	1	1	OTTDART00000027314	0	1	81269	NM_001024432.1	NM_001024432	rpap2	ENSDARG00000038397	554138	RNA polymerase II associated protein 2	NA	NA	NA	RNA polymerase II associated protein 2	ZDB-GENE-050522-420	rpap2	2	1	2	1	2	2	21212	2	11007276	11037454
MAD_Dr_004_168911	NM_001004540.1	3	1	ENSDART00000053399 ; Dr.16380 ; OTTDART00000027017	0	1	52278	NM_001004540.1	NM_001004540	aldh8a1	ENSDARG00000036776	447801	aldehyde dehydrogenase 8 family, member A1	NA	NA	NA	aldehyde dehydrogenase 8 family, member A1	ZDB-GENE-040912-3	aldh8a1	2	1	2	1	2	2	21212	23	31826073	31837222
MAD_Dr_004_169885	OTTDART00000028545	1	1	ENSDART00000099841	0	1	53931	NA	NA	NA	ENSDARG00000068919	450081	NA	NA	NA	NA	NA	ZDB-GENE-041010-204	rad51c	2	1	2	1	2	2	21212	10	32719320	32728648
MAD_Dr_004_179765	ENSDART00000074845	0	-	-	0	1	68955	NA	NA	NA	ENSDARG00000052903	-	NA	NA	NA	NA	zgc:101635	NA	NA	2	1	2	1	2	2	21212	21	11163797	11193855
MAD_Dr_004_174037	OTTDART00000037897	2	1	Dr.114548 ; NM_001083557.1	0	1	60187	NA	NA	NA	ENSDARG00000077698	565897	NA	NA	NA	NA	radical S-adenosyl methionine domain containing 1	ZDB-GENE-030131-2508	rsad1	2	1	2	1	2	2	21212	3	49119989	49137623
MAD_Dr_004_179985	ENSDART00000055844	0	-	-	0	1	69304	NA	NA	NA	ENSDARG00000069673	337225	NA	NA	NA	NA	chitinase domain containing 1	ZDB-GENE-030131-9169	chid1	2	1	2	1	2	2	21212	25	3662415	3675230
MAD_Dr_004_181255	XM_001921384.1	0	-	-	0	1	71658	XM_001921384.1	XM_001921384	NA	ENSDARG00000069106	-	NA	NA	NA	NA	NA	NA	NA	2	1	2	1	2	2	21212	10	26873272	26875460
MAD_Dr_004_181371	XM_678136.3 ; Dr.22009	0	1		0	1	71982	XM_678136.3	XM_678136	NA	ENSDARG00000075368	555586	NA	Dr.22009	wu:fa18a02	wu:fa18a02	similar to FtsJ homolog 2	ZDB-GENE-131127-640	si:dkey-72a22.3	2	1	2	1	2	2	21212	3	41984204	41987207
MAD_Dr_004_183045	ENSDART00000055407 ; OTTDART00000023674	2	0	Dr.75565 ; NM_001002061.1	0	1	74725	NA	NA	NA	ENSDARG00000038010	415151	NA	NA	NA	NA	ras-related C3 botulinum toxin substrate 2 (rho family, small GTP binding protein Rac2)	ZDB-GENE-040625-27	rac2	2	1	2	1	2	2	21212	3	29380001	29412427
MAD_Dr_004_184145	NM_199637.1 ; Dr.11342	0	1		0	1	76476	NM_199637.1	NM_199637	zgc:73225	ENSDARG00000074564	323326	zgc:73225	Dr.11342	zgc:73225	zgc:73225	zgc:73225	ZDB-GENE-110603-2	fam57bb	2	1	2	1	2	2	21212	12	3703024	3719640
MAD_Dr_004_186294	ENSDART00000040900	1	1	OTTDART00000027848	0	1	79705	NA	NA	NA	ENSDARG00000030881	503609	NA	NA	NA	NA	bcl2-associated X protein, b	ZDB-GENE-050227-21	baxb	2	1	2	1	2	2	21212	3	31943092	31948202
MAD_Dr_004_192509	Dr.116371	1	0	ENSDART00000043067	0	1	92200	NA	NA	NA	ENSDARG00000032156	571939	NA	Dr.116371	zgc:171776	zgc:171776	zgc:171776	ZDB-GENE-071004-36	zgc:171776	2	1	2	1	2	2	21212	9	8418425	8420789
MAD_Dr_004_199315	OTTDART00000027989	3	0	ENSDART00000074591 ; OTTDART00000027988 ; NM_201585.1	0	1	9968	NA	NA	NA	ENSDARG00000052694	327198	NA	NA	NA	NA	mical-like 2	ZDB-GENE-030131-5409	micall2a	2	1	2	1	2	2	21212	NA	NA	NA
MAD_Dr_004_102401	OTTDART00000037726	6	0	OTTDART00000037724 ; ENSDART00000020833 ; ENSDART00000088901 ; Dr.76670 ; NM_001079956.1 ; OTTDART00000037723	0	1	102531	NA	NA	NA	ENSDARG00000011824	553293	NA	NA	NA	NA	zgc:158151	ZDB-GENE-070112-2032	pbxip1b	2	1	2	1	2	2	21212	16	22834766	22860138
MAD_Dr_004_182607	ENSDART00000076786	2	1	Dr.81735 ; XR_045262.1	0	1	74031	NA	NA	NA	ENSDARG00000037978	-	NA	NA	NA	NA	NA	ZDB-GENE-080917-46	clec19a	2	1	2	1	2	2	21212	3	31030449	31059886
MAD_Dr_004_161786	OTTDART00000016060	0	-	-	0	1	42029	NA	NA	NA	ENSDARG00000061480	8388607	NA	NA	NA	NA	NA	ZDB-GENE-050420-315	si:ch211-132b12.1	2	1	2	1	2	2	21212	18	40562428	40575584
MAD_Dr_004_116433	OTTDART00000027978	1	1	Dr.29431	0	1	116947	NA	NA	NA	ENSDARG00000033382	445036	NA	NA	NA	NA	galectin related inter-fiber protein	ZDB-GENE-040801-163	grifin	2	1	2	1	2	2	21212	3	41644003	41649320
MAD_Dr_004_179991	OTTDART00000037680 ; ENSDART00000014851	0	1		0	1	69312	NA	NA	NA	ENSDARG00000068385	415209	NA	NA	NA	NA	tropomyosin 2 (beta)	ZDB-GENE-040625-114	tpm2	2	1	2	1	1	2	21211	NA	NA	NA
MAD_Dr_004_180774	NM_199884.1 ; Dr.118743 ; ENSDART00000007271	1	1	OTTDART00000029449	0	1	70500	NM_199884.1	NM_199884	fam54b	ENSDARG00000003940	334296	family with sequence similarity 54, member B	Dr.118743	fam54b	family with sequence similarity 54, member B	family with sequence similarity 54, member B	ZDB-GENE-030131-6228	mtfr1l	2	1	2	1	1	2	21211	17	24699800	24708891
MAD_Dr_004_192311	NM_001002548.1	3	1	ENSDART00000055152 ; Dr.83629 ; OTTDART00000042087	0	1	91826	NM_001002548.1	NM_001002548	zgc:92784	ENSDARG00000037855	436821	zgc:92784	NA	NA	NA	zgc:92784	ZDB-GENE-040718-283	taf11	2	1	2	1	1	2	21211	23	296270	302644
MAD_Dr_004_144745	OTTDART00000008779	0	-	-	0	1	17428	NA	NA	NA	ENSDARG00000004336	559866	NA	NA	NA	NA	NA	ZDB-GENE-041210-112	exoc4	2	1	2	1	1	2	21211	4	15607089	15817785
MAD_Dr_004_163466	NM_207100.2 ; Dr.16044 ; OTTDART00000037232	0	1		0	1	44357	NM_207100.2	NM_207100	zgc:77041	ENSDARG00000068291	404632	zgc:77041	Dr.16044	zgc:77041	zgc:77041	zgc:77041; hypothetical protein LOC100151428	ZDB-GENE-040426-2523	zgc:77041	2	1	1	4	3	4	21143	7	51879150	51883460
MAD_Dr_004_165294	NM_001003842.2 ; Dr.13009 ; ENSDART00000114948	0	1		0	1	47031	NM_001003842.2	NM_001003842	spry2	ENSDARG00000078308	335098	sprouty homolog 2	Dr.13009	spry2	sprouty homolog 2	sprouty homolog 2	ZDB-GENE-030131-7038	spry2	2	1	1	4	3	4	21143	1	4557535	4561637
MAD_Dr_004_188903	OTTDART00000029930	1	1	ENSDART00000005888	0	1	8578	NA	NA	NA	ENSDARG00000058159	555520	NA	NA	NA	NA	si:ch211-116i17.1	ZDB-GENE-060503-3	ipo8	2	1	1	3	3	3	21133	4	9359781	9388443
MAD_Dr_004_149704	Dr.79390	0	-	-	0	1	24044	NA	NA	NA	ENSDARG00000002663	336159	NA	Dr.79390	optn	optineurin	optineurin	ZDB-GENE-030131-8103	optn	2	1	1	3	3	3	21133	4	8007828	8018689
MAD_Dr_004_174453	OTTDART00000019942	0	-	-	0	1	60802	NA	NA	NA	ENSDARG00000009657	335511	NA	NA	NA	NA	NA	ZDB-GENE-030131-7451	fgfr1op2	2	1	1	3	3	3	21133	4	1873586	1881607
MAD_Dr_004_181161	NM_214735.1 ; Dr.78158	2	0	ENSDART00000032392 ; OTTDART00000014992	0	1	71490	NM_214735.1	NM_214735	dhdhl	ENSDARG00000028336	406433	dihydrodiol dehydrogenase (dimeric), like	Dr.78158	dhdhl	dihydrodiol dehydrogenase (dimeric), like	dihydrodiol dehydrogenase (dimeric), like	ZDB-GENE-040426-2180	dhdhl	2	1	1	3	3	3	21133	18	1077870	1084699
MAD_Dr_004_147363	OTTDART00000009508	5	1	ENSDART00000066932 ; Dr.852 ; NM_213007.1 ; ENSDART00000066933 ; OTTDART00000009509	0	1	20822	NA	NA	NA	ENSDARG00000045516	406280	NA	NA	NA	NA	inter-alpha (globulin) inhibitor H2	ZDB-GENE-040426-1942	itih2	2	1	1	3	3	3	21133	4	25198714	25226770
MAD_Dr_004_149200	Dr.78689	3	0	XM_001331569.2 ; ENSDART00000097384 ; NM_201088.1	0	1	23390	NA	NA	NA	ENSDARG00000024702	791461	NA	Dr.78689	parn	poly(A)-specific ribonuclease (deadenylation nucle	hypothetical LOC791461; zgc:56067	ZDB-GENE-040426-880	parn	2	1	1	3	2	3	21132	NA	NA	NA
MAD_Dr_004_155720	NM_001127471.1 ; Dr.75916 ; ENSDART00000110458	0	1		0	1	33532	NM_001127471.1	NM_001127471	zgc:175133	ENSDARG00000079252	100151756	zgc:175133	Dr.75916	zgc:175133	zgc:175133	zgc:175133	ZDB-GENE-080515-7	fam117ab	2	1	1	3	2	3	21132	12	9811633	9838233
MAD_Dr_004_172669	NM_001162443.1	1	0	ENSDART00000109392	0	1	58168	NM_001162443.1	NM_001162443	NA	ENSDARG00000074842	555448	NA	NA	NA	NA	similar to Sorting nexin-8	NA	NA	2	1	1	3	2	3	21132	3	41948594	41978969
MAD_Dr_004_188500	OTTDART00000029554	0	-	-	0	1	83163	NA	NA	NA	ENSDARG00000039455	8388607	NA	NA	NA	NA	NA	ZDB-GENE-050417-295	tspan15	2	1	1	3	2	3	21132	13	22793574	22831160
MAD_Dr_004_189219	OTTDART00000018798	0	-	-	0	1	87495	NA	NA	NA	ENSDARG00000093129	560783	NA	NA	NA	NA	NA	ZDB-GENE-060503-753	si:rp71-45k5.2	2	1	1	3	2	3	21132	19	35407313	35408509
MAD_Dr_004_103259	OTTDART00000036851	0	-	-	0	1	103398	NA	NA	NA	ENSDARG00000053862	335789	NA	NA	NA	NA	crystallin, gamma MX	ZDB-GENE-030131-7732	crygmx	2	1	1	3	2	3	21132	12	30723265	30726777
MAD_Dr_004_175403	OTTDART00000020386	0	-	-	0	1	62217	NA	NA	NA	ENSDARG00000055395	405843	NA	NA	NA	NA	NA	ZDB-GENE-040426-2090	foxq1b	2	1	1	3	2	3	21132	20	26784843	26786305
MAD_Dr_004_170318	OTTDART00000022982	0	-	-	0	1	54555	NA	NA	NA	ENSDARG00000059425	-	NA	NA	NA	NA	NA	ZDB-GENE-060526-196	sntg2	2	1	1	3	1	3	21131	NA	NA	NA
MAD_Dr_004_132417	OTTDART00000041992	1	1	Dr.74735	0	1	132029	NA	NA	NA	ENSDARG00000093438	8388607	NA	NA	NA	NA	NA	ZDB-GENE-090313-142	si:ch73-191k20.4	2	1	1	2	3	3	21123	1	8290389	8293852
MAD_Dr_004_183469	OTTDART00000041423	0	-	-	0	1	7544	NA	NA	NA	ENSDARG00000029133	563517	NA	NA	NA	NA	NA	ZDB-GENE-030616-538	tubgcp3	2	1	1	2	3	3	21123	1	45714062	45759038
MAD_Dr_004_156784	OTTDART00000026405	0	-	-	0	1	35036	NA	NA	NA	ENSDARG00000054867	798364	NA	NA	NA	NA	NA	ZDB-GENE-050327-29	hibch	2	1	1	2	3	3	21123	9	41072407	41123156
MAD_Dr_004_184645	ENSDART00000037293	3	0	OTTDART00000036345 ; Dr.134084 ; NM_001020615.1	0	1	77185	NA	NA	NA	ENSDARG00000027826	553642	NA	NA	NA	NA	zgc:110639	ZDB-GENE-050522-36	hdhd1	2	1	1	2	3	3	21123	1	31608916	31653097
MAD_Dr_004_152972	OTTDART00000027866	0	-	-	0	1	28569	NA	NA	NA	ENSDARG00000008457	436973	NA	NA	NA	NA	NA	ZDB-GENE-040718-453	faah2a	2	1	1	2	3	3	21123	1	39519203	39540357
MAD_Dr_004_100441	Dr.77370 ; OTTDART00000027192	0	1		0	1	100502	NA	NA	NA	ENSDARG00000045402	494135	NA	Dr.77370	commd3	COMM domain containing 3	COMM domain containing 3	ZDB-GENE-041219-3	commd3	2	1	1	2	2	2	21122	24	17112374	17115224
MAD_Dr_004_197488	NM_001081629.1 ; Dr.76168	2	1	OTTDART00000036259 ; ENSDART00000024215	0	1	9780	NM_001081629.1	NM_001081629	smarca5	ENSDARG00000052348	282615	SWI/SNF related, matrix associated, actin dependen	Dr.76168	wu:fj99e09	wu:fj99e09	SWI/SNF related, matrix associated, actin dependent regulator of chromatin, subfamily a, member 5; similar to SWI/SNF related, matrix associated, actin dependent regulator of chromatin, subfamily a, member 5	ZDB-GENE-021125-1	smarca5	2	1	1	2	2	2	21122	1	52157701	52186216
MAD_Dr_004_100712	NM_001110347.1 ; Dr.70147	0	1		0	1	10080	NM_001110347.1	NM_001110347	NA	ENSDARG00000079363	564554	NA	Dr.70147	NA	NA	leucine-rich repeats and immunoglobulin-like domains 3	ZDB-GENE-130530-866	lrig3	2	1	1	2	2	2	21122	15	2978599	3011650
MAD_Dr_004_102729	XM_001922995.1 ; XM_001922993.1	0	1		0	1	102871	XM_001922995.1	XM_001922995	NA	ENSDARG00000090152	-	NA	NA	NA	NA	NA	NA	NA	2	1	1	2	2	2	21122	23	43916597	43922406
MAD_Dr_004_170403	ENSDART00000083070	3	0	OTTDART00000036679 ; Dr.79834 ; NM_001089394.1	0	1	54665	NA	NA	NA	ENSDARG00000059634	561938	NA	NA	NA	NA	zgc:163086	ZDB-GENE-030131-9745	thumpd3	2	1	1	2	2	2	21122	6	19933366	19962414
MAD_Dr_004_105239	OTTDART00000037261	0	-	-	0	1	10541	NA	NA	NA	ENSDARG00000006963	30707	NA	NA	NA	NA	NA	ZDB-GENE-990603-1	cse1l	2	1	1	2	2	2	21122	11	5522383	5543878
MAD_Dr_004_105897	OTTDART00000034070 ; OTTDART00000034069	1	0	Dr.85616	0	1	106095	NA	NA	NA	ENSDARG00000093452	-	NA	NA	NA	NA	NA	ZDB-GENE-081104-488	si:rp71-68n21.11	2	1	1	2	2	2	21122	9	21392963	21394675
MAD_Dr_004_105910	OTTDART00000041362	1	1	OTTDART00000041361	0	1	106113	NA	NA	NA	ENSDARG00000093237	566247	NA	NA	NA	NA	hypothetical LOC566247	ZDB-GENE-090313-134	si:ch211-89o9.4	2	1	1	2	2	2	21122	1	40751423	40761220
MAD_Dr_004_106915	OTTDART00000044469 ; OTTDART00000044470	3	1	OTTDART00000044464 ; OTTDART00000044463 ; ENSDART00000102903	0	1	107107	NA	NA	NA	ENSDARG00000008487	83773	NA	NA	NA	NA	NA	ZDB-GENE-010426-1	dmd	2	1	1	2	2	2	21122	1	10140542	10391292
MAD_Dr_004_144501	ENSDART00000104570	2	1	XM_695213.3 ; Dr.75487	0	1	17092	NA	NA	NA	ENSDARG00000070939	-	NA	NA	NA	NA	NA	ZDB-GENE-030131-5064	znf740a	2	1	1	2	2	2	21122	11	2229565	2274410
MAD_Dr_004_109901	OTTDART00000028628	3	1	OTTDART00000028627 ; ENSDART00000063425 ; OTTDART00000028629	0	1	110163	NA	NA	NA	ENSDARG00000043209	406690	NA	NA	NA	NA	NA	ZDB-GENE-040426-2476	nsun5	2	1	1	2	2	2	21122	10	35209068	35219752
MAD_Dr_004_111436	ENSDART00000080025	1	1	NR_027705.1	0	1	111742	NA	NA	NA	ENSDARG00000057378	-	NA	NA	NA	NA	NA	ZDB-GENE-030131-2459	fam213aa	2	1	1	2	2	2	21122	13	18528333	18538583
MAD_Dr_004_116268	NM_001013554.1	0	-	-	0	1	116716	NM_001013554.1	NM_001013554	znrd1	ENSDARG00000036070	541428	zinc ribbon domain containing 1	NA	NA	NA	zinc ribbon domain containing 1	ZDB-GENE-050320-131	znrd1	2	1	1	2	2	2	21122	19	27750304	27755649
MAD_Dr_004_118105	Dr.117233	7	1	ENSDART00000110574 ; ENSDART00000115236 ; NM_001172637.1 ; XM_683022.3 ; OTTDART00000043948 ; NM_001110169.1 ; Dr.119789	0	1	118663	NA	NA	NA	ENSDARG00000074105	795693	NA	Dr.117233	zgc:171957	zgc:171957	zgc:171957	ZDB-GENE-071004-10	zgc:171957	2	1	1	2	2	2	21122	NA	NA	NA
MAD_Dr_004_118772	OTTDART00000037765	1	1	OTTDART00000037764	0	1	119213	NA	NA	NA	ENSDARG00000003869	436717	NA	NA	NA	NA	NA	ZDB-GENE-040718-142	decr1	2	1	1	2	2	2	21122	16	36794654	36806272
MAD_Dr_004_119131	OTTDART00000010745	0	-	-	0	1	119554	NA	NA	NA	ENSDARG00000075334	-	NA	NA	NA	NA	NA	NA	NA	2	1	1	2	2	2	21122	15	19100645	19192973
MAD_Dr_004_183768	ENSDART00000051529	0	-	-	0	1	75902	NA	NA	NA	ENSDARG00000035549	404623	NA	NA	NA	NA	uracil phosphoribosyltransferase (FUR1) homolog (S	ZDB-GENE-040426-2411	uprt	2	1	1	2	2	2	21122	5	22604004	22614490
MAD_Dr_004_175071	XM_686171.3 ; Dr.110870	0	1		0	1	61708	XM_686171.3	XM_686171	NA	ENSDARG00000063519	562797	NA	Dr.110870	thumpd2	THUMP domain containing 2	similar to THUMP domain containing 2	ZDB-GENE-090428-2	thumpd2	2	1	1	2	2	2	21122	10	36787281	36794884
MAD_Dr_004_123263	OTTDART00000020627 ; NM_001045026.1 ; Dr.86593	1	0	ENSDART00000088427	0	1	12372	NM_001045026.1	NM_001045026	si:dkey-218n20.1	ENSDARG00000061752	563800	si:dkey-218n20.1	Dr.86593	si:dkey-218n20.1	si:dkey-218n20.1	si:dkey-218n20.1	ZDB-GENE-060503-342	fam65b	2	1	1	2	2	2	21122	19	32006140	32120579
MAD_Dr_004_125995	OTTDART00000014857	1	0	Dr.124460	0	1	126110	NA	NA	NA	ENSDARG00000094299	-	NA	NA	NA	NA	NA	ZDB-GENE-050419-187	si:ch211-161f1.3	2	1	1	2	2	2	21122	4	11792348	11794922
MAD_Dr_004_127174	ENSDART00000106474	1	1	OTTDART00000038509	0	1	127223	NA	NA	NA	ENSDARG00000071808	565497	NA	NA	NA	NA	zgc:158852	ZDB-GENE-070112-972	zgc:158852	2	1	1	2	2	2	21122	NA	NA	NA
MAD_Dr_004_127807	ENSDART00000097531	1	1	Dr.76226	0	1	127808	NA	NA	NA	ENSDARG00000067717	751649	NA	NA	NA	NA	zgc:152998	ZDB-GENE-060825-115	tomm7	2	1	1	2	2	2	21122	19	2754895	2764731
MAD_Dr_004_131218	OTTDART00000042669	3	1	OTTDART00000042671 ; XR_045062.1 ; OTTDART00000042670	0	1	130924	NA	NA	NA	ENSDARG00000088091	799355	NA	NA	NA	NA	NA	ZDB-GENE-031002-33	pfn1	2	1	1	2	2	2	21122	23	44782492	44787674
MAD_Dr_004_132145	NM_001002495.2 ; OTTDART00000026974	1	1	Dr.76094	0	1	131769	NM_001002495.2	NM_001002495	uqcrq	ENSDARG00000029064	436768	ubiquinol-cytochrome c reductase, complex III subu	NA	NA	NA	ubiquinol-cytochrome c reductase, complex III subunit VII	ZDB-GENE-040718-199	uqcrq	2	1	1	2	2	2	21122	14	38534764	38538105
MAD_Dr_004_133882	OTTDART00000015991	1	1	ENSDART00000064076	0	1	133473	NA	NA	NA	ENSDARG00000043635	368857	NA	NA	NA	NA	NA	ZDB-GENE-030616-409	cmc2	2	1	1	2	2	2	21122	18	29910705	29920115
MAD_Dr_004_136718	OTTDART00000014973	5	0	Dr.131196 ; Dr.131163 ; Dr.131111 ; Dr.91069 ; OTTDART00000014963	0	1	136284	NA	NA	NA	ENSDARG00000092097	-	NA	NA	NA	NA	NA	ZDB-GENE-050420-89	si:ch211-285d14.4	2	1	1	2	2	2	21122	4	16041359	16043403
MAD_Dr_004_152500	NM_200505.1	1	1	XM_686793.2	0	1	27849	NM_200505.1	NM_200505	znf131	ENSDARG00000068396	393477	zinc finger protein 131	NA	NA	NA	zinc finger protein 131; similar to Znf131 protein	ZDB-GENE-040426-1563	znf131	2	1	1	2	2	2	21122	NA	NA	NA
MAD_Dr_004_141779	NM_001159977.1 ; OTTDART00000002220	0	1		0	1	141279	NM_001159977.1	NM_001159977	pi15a	ENSDARG00000045378	553702	peptidase inhibitor 15a	NA	NA	NA	ganglioside-induced differentiation-associated protein 1	ZDB-GENE-040724-135	pi15a	2	1	1	2	2	2	21122	24	14657425	14666215
MAD_Dr_004_142686	XM_001919346.1	0	-	-	0	1	14713	XM_001919346.1	XM_001919346	NA	ENSDARG00000059718	-	NA	NA	NA	NA	NA	ZDB-GENE-030131-2965	lrrc8c	2	1	1	2	2	2	21122	NA	NA	NA
MAD_Dr_004_146164	Dr.28440	4	0	OTTDART00000001441 ; ENSDART00000061378 ; NM_200094.1 ; OTTDART00000025499	0	1	19204	NA	NA	NA	ENSDARG00000041887	796388	NA	Dr.28440	sf3a1	splicing factor 3a, subunit 1	splicing factor 3a, subunit 1	ZDB-GENE-030616-156	sf3a1	2	1	1	2	2	2	21122	8	36522382	36537802
MAD_Dr_004_155337	ENSDART00000110185	2	1	XM_001332041.2 ; OTTDART00000044617	0	1	32787	NA	NA	NA	ENSDARG00000075192	793098	NA	NA	NA	NA	NA	ZDB-GENE-091113-41	yme1l1a	2	1	1	2	2	2	21122	24	32610503	32634677
MAD_Dr_004_144335	OTTDART00000042630	1	1	ENSDART00000000876	0	1	16873	NA	NA	NA	ENSDARG00000000796	431720	NA	NA	NA	NA	NA	ZDB-GENE-040704-11	nr4a1	2	1	1	2	2	2	21122	23	32224792	32236279
MAD_Dr_004_168155	ENSDART00000113671	1	1	OTTDART00000029718	0	1	51168	NA	NA	NA	ENSDARG00000058219	415183	NA	NA	NA	NA	tubulin, delta 1	ZDB-GENE-040625-73	tubd1	2	1	1	2	2	2	21122	15	17461299	17470034
MAD_Dr_004_145568	ENSDART00000043309 ; NM_001080637.2	0	1		0	1	18463	NM_001080637.2	NM_001080637	tbck	ENSDARG00000013667	791155	TBC1 domain containing kinase	NA	NA	NA	TBC1 domain containing kinase	ZDB-GENE-070112-1062	tbck	2	1	1	2	2	2	21122	1	49554781	49650122
MAD_Dr_004_148285	OTTDART00000039030	1	1	XM_687318.3	0	1	22164	NA	NA	NA	ENSDARG00000059070	337230	NA	NA	NA	NA	si:dkey-276i5.1	ZDB-GENE-030131-9174	gars	2	1	1	2	2	2	21122	24	20391637	20410550
MAD_Dr_004_148380	OTTDART00000028012	1	0	ENSDART00000016350	0	1	22294	NA	NA	NA	ENSDARG00000014068	327165	NA	NA	NA	NA	NA	ZDB-GENE-030131-5376	pgam1b	2	1	1	2	2	2	21122	1	54030016	54041212
MAD_Dr_004_148898	OTTDART00000028814	3	1	ENSDART00000029366 ; Dr.18138 ; NM_199735.1	0	1	22996	NA	NA	NA	ENSDARG00000025577	326023	NA	NA	NA	NA	zgc:66447	ZDB-GENE-030131-4748	zgc:66447	2	1	1	2	2	2	21122	14	11714922	11745640
MAD_Dr_004_148951	NM_001020578.1 ; Dr.80118	1	1	ENSDART00000102257	0	1	23058	NM_001020578.1	NM_001020578	zgc:110251	ENSDARG00000069966	553602	zgc:110251	Dr.80118	zgc:110251	zgc:110251	zgc:110251	ZDB-GENE-050522-330	alox5b.3	2	1	1	2	2	2	21122	15	631450	643550
MAD_Dr_004_154896	ENSDART00000082404	1	1	ENSDART00000082409	0	1	31622	NA	NA	NA	ENSDARG00000059323	-	NA	NA	NA	NA	ribophorin I	ZDB-GENE-030131-4286	rpn1	2	1	1	2	2	2	21122	11	3872999	3888550
MAD_Dr_004_149673	OTTDART00000039192	3	0	Dr.151366 ; Dr.148983 ; OTTDART00000044393	0	1	24006	NA	NA	NA	ENSDARG00000092885	8388607	NA	NA	NA	NA	NA	ZDB-GENE-070822-24	zgc:171977	2	1	1	2	2	2	21122	24	9836242	9838956
MAD_Dr_004_150360	ENSDART00000076425	2	0	Dr.75313 ; NM_001039823.1	0	1	24940	NA	NA	NA	ENSDARG00000054264	569049	NA	NA	NA	NA	zgc:136860	ZDB-GENE-060312-33	cog4	2	1	1	2	2	2	21122	7	28752976	28768127
MAD_Dr_004_150900	NM_131539.1	1	0	OTTDART00000024963	0	1	25688	NM_131539.1	NM_131539	pim1	ENSDARG00000059001	58054	pim-1 oncogene	NA	NA	NA	pim-1 oncogene	ZDB-GENE-000831-6	pim2	2	1	1	2	2	2	21122	8	8889285	8895484
MAD_Dr_004_150850	NM_001089330.1 ; Dr.78493	3	0	ENSDART00000113903 ; ENSDART00000086335 ; OTTDART00000042862	0	1	25626	NM_001089330.1	NM_001089330	zgc:162979	ENSDARG00000077417	324123	zgc:162979	Dr.78493	zgc:162979	zgc:162979	zgc:162979	ZDB-GENE-030131-2843	dgcr14	2	1	1	2	2	2	21122	NA	NA	NA
MAD_Dr_004_157627	NM_001002380.1 ; Dr.78178 ; ENSDART00000004585	1	1	OTTDART00000040179	0	1	36168	NM_001002380.1	NM_001002380	zgc:92063	ENSDARG00000021048	436653	zgc:92063	Dr.78178	zgc:92063	zgc:92063	zgc:92063	ZDB-GENE-040718-75	clptm1l	2	1	1	2	2	2	21122	19	1906395	1921560
MAD_Dr_004_153809	NM_214740.1 ; Dr.81163	1	0	ENSDART00000050619	0	1	30087	NM_214740.1	NM_214740	zgc:85947	ENSDARG00000030090	406519	zgc:85947	Dr.81163	zgc:85947	zgc:85947	zgc:85947	ZDB-GENE-040426-2347	slc10a3	2	1	1	2	2	2	21122	NA	NA	NA
MAD_Dr_004_169396	ENSDART00000015170	2	1	Dr.106156 ; XM_001923064.1	0	1	53010	NA	NA	NA	ENSDARG00000004939	553275	NA	NA	NA	NA	lyric-like	ZDB-GENE-090929-2	mtdhb	2	1	1	2	2	2	21122	16	41767281	41782427
MAD_Dr_004_158522	ENSDART00000111636	2	1	Dr.86743 ; NM_001127308.1	0	1	3753	NA	NA	NA	ENSDARG00000076302	570481	NA	NA	NA	NA	similar to Protein deltex-4 (Deltex4); deltex1	NA	NA	2	1	1	2	2	2	21122	7	18305922	18348939
MAD_Dr_004_158503	NM_200941.1 ; Dr.82264 ; ENSDART00000023153	0	1		0	1	37499	NM_200941.1	NM_200941	rabgef1l	ENSDARG00000015968	393915	RAB guanine nucleotide exchange factor (GEF) 1, li	Dr.82264	rabgef1l	RAB guanine nucleotide exchange factor (GEF) 1, li	RAB guanine nucleotide exchange factor (GEF) 1, li	ZDB-GENE-040426-813	rabgef1l	2	1	1	2	2	2	21122	15	1753759	1768350
MAD_Dr_004_159384	XM_681942.3	0	-	-	0	1	3878	XM_681942.3	XM_681942	NA	ENSDARG00000052818	-	NA	NA	NA	NA	NA	NA	NA	2	1	1	2	2	2	21122	3	40113550	40117092
MAD_Dr_004_159959	NM_200019.1	0	-	-	0	1	39560	NM_200019.1	NM_200019	hadhb	ENSDARG00000057147	336606	hydroxyacyl-Coenzyme A dehydrogenase/3-ketoacyl-Co	NA	NA	NA	hydroxyacyl-Coenzyme A dehydrogenase/3-ketoacyl-Coenzyme A thiolase/enoyl-Coenzyme A hydratase (trifunctional protein), beta subunit	ZDB-GENE-030131-8550	hadhb	2	1	1	2	2	2	21122	NA	NA	NA
MAD_Dr_004_160378	ENSDART00000013850	1	0	XM_001337299.2	0	1	40108	NA	NA	NA	ENSDARG00000058963	-	NA	NA	NA	NA	bloodthirsty-related gene family, member 18	ZDB-GENE-080213-2	btr18	2	1	1	2	2	2	21122	NA	NA	NA
MAD_Dr_004_160705	ENSDART00000029157	0	-	-	0	1	40545	NA	NA	NA	ENSDARG00000023768	393503	NA	NA	NA	NA	major facilitator superfamily domain containing 4	ZDB-GENE-040426-1643	mfsd4a	2	1	1	2	2	2	21122	11	38162114	38191201
MAD_Dr_004_160899	NM_001030064.1 ; Dr.76572	2	0	ENSDART00000052692 ; XM_001331158.1	0	1	40802	NM_001030064.1	NM_001030064	rnaset2	ENSDARG00000036282	791890	ribonuclease T2	Dr.76572	rnaset2	ribonuclease T2	zgc:113369	ZDB-GENE-030131-2513	rnaset2	2	1	1	2	2	2	21122	13	9736875	9752591
MAD_Dr_004_163238	OTTDART00000015223	0	-	-	0	1	44066	NA	NA	NA	ENSDARG00000033020	393753	NA	NA	NA	NA	NA	ZDB-GENE-040426-1749	ppcdc	2	1	1	2	2	2	21122	18	18986473	18990454
MAD_Dr_004_163534	OTTDART00000029565	0	-	-	0	1	44460	NA	NA	NA	ENSDARG00000026757	334081	NA	NA	NA	NA	NA	ZDB-GENE-030131-6013	rnf168	2	1	1	2	2	2	21122	NA	NA	NA
MAD_Dr_004_163638	OTTDART00000008742	0	-	-	0	1	44599	NA	NA	NA	ENSDARG00000057974	553633	NA	NA	NA	NA	NA	ZDB-GENE-030131-2617	parp12b	2	1	1	2	2	2	21122	4	9812837	9821603
MAD_Dr_004_185522	OTTDART00000027822	0	-	-	0	1	7858	NA	NA	NA	ENSDARG00000037018	406666	NA	NA	NA	NA	GRB2-associated binding protein 1	ZDB-GENE-040426-2674	gab1	2	1	1	2	2	2	21122	1	34762810	34877632
MAD_Dr_004_164207	Dr.123384	1	1	OTTDART00000037623	0	1	45409	NA	NA	NA	ENSDARG00000079091	100150317	NA	Dr.123384	NA	NA	similar to M-phase phosphoprotein 9	NA	NA	2	1	1	2	2	2	21122	NA	NA	NA
MAD_Dr_004_164392	NM_213332.1	1	1	ENSDART00000098378	0	1	45669	NM_213332.1	NM_213332	zgc:63986	ENSDARG00000006040	406641	zgc:63986	NA	NA	NA	zgc:63986	ZDB-GENE-040426-2646	cyp20a1	2	1	1	2	2	2	21122	6	9717139	9733919
MAD_Dr_004_165069	ENSDART00000019818	1	1	NM_001005293.1	0	1	46702	NA	NA	NA	ENSDARG00000005972	334503	NA	NA	NA	NA	synembryn-like	ZDB-GENE-030131-6435	ric8b	2	1	1	2	2	2	21122	18	15327407	15360959
MAD_Dr_004_166169	ENSDART00000032778	2	1	Dr.79529 ; NM_201137.1	0	1	48316	NA	NA	NA	ENSDARG00000024940	394112	NA	NA	NA	NA	zgc:63907	ZDB-GENE-040426-1292	zgc:63907	2	1	1	2	2	2	21122	16	43464814	43488697
MAD_Dr_004_166350	ENSDART00000052134	1	1	OTTDART00000019210	0	1	48586	NA	NA	NA	ENSDARG00000035918	393892	NA	NA	NA	NA	basic leucine zipper and W2 domains 2	ZDB-GENE-040426-746	bzw2	2	1	1	2	2	2	21122	19	31422383	31455284
MAD_Dr_004_166772	OTTDART00000044005	3	1	OTTDART00000044004 ; ENSDART00000086115 ; XR_029463.2	0	1	49188	NA	NA	NA	ENSDARG00000060837	-	NA	NA	NA	NA	NA	ZDB-GENE-091112-24	trpc5b	2	1	1	2	2	2	21122	21	34098257	34177168
MAD_Dr_004_170349	ENSDART00000088986	2	1	Dr.151660 ; NM_001030092.1	0	1	54590	NA	NA	NA	ENSDARG00000058342	555744	NA	NA	NA	NA	hypothetical protein LOC100149363; zgc:110324	ZDB-GENE-050913-123	grhl2a	2	1	1	2	2	2	21122	16	9916361	9939549
MAD_Dr_004_167035	NM_213071.1 ; ENSDART00000043938	2	0	Dr.132196 ; NM_213325.1	0	1	49568	NM_213071.1	NM_213071	tram2	ENSDARG00000030092	406344	translocation associated membrane protein 2	NA	NA	NA	zgc:193538; translocation associated membrane protein 2	ZDB-GENE-040426-2024	tram2	2	1	1	2	2	2	21122	20	47639163	47662909
MAD_Dr_004_167209	OTTDART00000013635	0	-	-	0	1	49825	NA	NA	NA	ENSDARG00000028058	554561	NA	NA	NA	NA	NA	ZDB-GENE-030131-5735	traf6	2	1	1	2	2	2	21122	7	48450062	48465942
MAD_Dr_004_167364	ENSDART00000091272	0	-	-	0	1	50021	NA	NA	NA	ENSDARG00000062834	569243	NA	NA	NA	NA	ECSIT homolog (Drosophila)	ZDB-GENE-030131-1332	ecsit	2	1	1	2	2	2	21122	7	17553356	17564948
MAD_Dr_004_168363	Dr.88345	0	-	-	0	1	515	NA	NA	NA	ENSDARG00000002385	403064	NA	Dr.88345	atm	ataxia telangiectasia mutated	similar to Serine-protein kinase ATM (Ataxia telangiectasia mutated) (A-T, mutated); ataxia telangiectasia mutated	ZDB-GENE-040809-1	atm	2	1	1	2	2	2	21122	15	6517631	6653934
MAD_Dr_004_503470	NM_213303.1	4	0	gi|503496 ; gi|503470 ; gi|170107 ; gi|168715	1	1	-2	NM_213303.1	NM_213303	pold2	ENSDARG00000041881	796456	polymerase (DNA directed), delta 2, regulatory sub	NA	NA	NA	polymerase (DNA directed), delta 2, regulatory subunit	ZDB-GENE-030616-157	pold2	2	1	1	2	2	2	21122	NA	NA	NA
MAD_Dr_004_168786	ENSDART00000008980	0	-	-	0	1	52095	NA	NA	NA	ENSDARG00000077526	445296	NA	NA	NA	NA	zgc:100909	ZDB-GENE-040808-6	babam1	2	1	1	2	2	2	21122	11	6054032	6072937
MAD_Dr_004_169151	OTTDART00000030167	0	-	-	0	1	52632	NA	NA	NA	ENSDARG00000055216	573122	NA	NA	NA	NA	NA	ZDB-GENE-061114-1	tuba1c	2	1	1	2	2	2	21122	23	35591854	35595371
MAD_Dr_004_169637	OTTDART00000036876 ; ENSDART00000062858	2	1	Dr.37874 ; NM_001008634.1	0	1	53368	NA	NA	NA	ENSDARG00000042827	494091	NA	NA	NA	NA	2-aminoethanethiol (cysteamine) dioxygenase a	ZDB-GENE-041212-62	adoa	2	1	1	2	2	2	21122	12	8437025	8438670
MAD_Dr_004_169399	ENSDART00000049099	0	-	-	0	1	53013	NA	NA	NA	ENSDARG00000025043	393554	NA	NA	NA	NA	thyroid hormone receptor interactor 13	ZDB-GENE-040426-1488	trip13	2	1	1	2	2	2	21122	16	53079038	53103713
MAD_Dr_004_171031	ENSDART00000005326	3	1	Dr.51677 ; NM_001017654.1 ; OTTDART00000036716	0	1	55558	NA	NA	NA	ENSDARG00000013329	550347	NA	NA	NA	NA	tetratricopeptide repeat domain 5	ZDB-GENE-050417-137	ttc5	2	1	1	2	2	2	21122	7	19276297	19286438
MAD_Dr_004_172851	ENSDART00000039043 ; OTTDART00000038571	1	1	OTTDART00000038569	0	1	58475	NA	NA	NA	ENSDARG00000016742	337556	NA	NA	NA	NA	NA	ZDB-GENE-030131-9502	rgs7bpb	2	1	1	2	2	2	21122	21	20896718	20902852
MAD_Dr_004_174237	ENSDART00000109434	2	1	Dr.104697 ; XM_680587.2	0	1	60474	NA	NA	NA	ENSDARG00000077549	-	NA	NA	NA	NA	NA	ZDB-GENE-050506-76	aifm2	2	1	1	2	2	2	21122	13	6908864	6926844
MAD_Dr_004_173512	ENSDART00000082133	1	1	OTTDART00000016882	0	1	59410	NA	NA	NA	ENSDARG00000059109	407709	NA	NA	NA	NA	si:dkeyp-113d7.1	ZDB-GENE-030131-755	si:dkeyp-113d7.1	2	1	1	2	2	2	21122	19	5399501	5403844
MAD_Dr_004_175007	ENSDART00000082937	0	-	-	0	1	61603	NA	NA	NA	ENSDARG00000059574	798075	NA	NA	NA	NA	NA	ZDB-GENE-110901-1	fscn2a	2	1	1	2	2	2	21122	3	57166577	57189559
MAD_Dr_004_175374	OTTDART00000028874	0	-	-	0	1	62170	NA	NA	NA	ENSDARG00000040157	492466	NA	NA	NA	NA	NA	ZDB-GENE-041114-23	glt8d1	2	1	1	2	2	2	21122	11	3951118	3968498
MAD_Dr_004_176375	OTTDART00000033527	0	-	-	0	1	63699	NA	NA	NA	ENSDARG00000042025	553393	NA	NA	NA	NA	NA	ZDB-GENE-050809-8	si:dkeyp-118h3.6	2	1	1	2	2	2	21122	9	6629529	6640082
MAD_Dr_004_176895	NM_001114445.1	0	-	-	0	1	64494	NM_001114445.1	NM_001114445	zgc:174315	ENSDARG00000079222	571611	zgc:174315	NA	NA	NA	zgc:174315; hypothetical protein LOC100150101	ZDB-GENE-080219-29	zgc:174315	2	1	1	2	2	2	21122	4	28996915	29003958
MAD_Dr_004_178070	ENSDART00000083305	2	0	ENSDART00000110589 ; XM_692449.3	0	1	66312	NA	NA	NA	ENSDARG00000059712	569085	NA	NA	NA	NA	NA	ZDB-GENE-110411-262	slc19a2	2	1	1	2	2	2	21122	6	16309632	16329153
MAD_Dr_004_179014	OTTDART00000002145	3	1	ENSDART00000076519 ; Dr.15082 ; NM_200771.1	0	1	67857	NA	NA	NA	ENSDARG00000054334	393744	NA	NA	NA	NA	zgc:73273	ZDB-GENE-040426-1741	zgc:73273	2	1	1	2	2	2	21122	1	23866585	23867920
MAD_Dr_004_178779	OTTDART00000034494 ; Dr.79547	2	1	NM_001045341.1 ; ENSDART00000062656	0	1	67508	NA	NA	NA	ENSDARG00000003675	751596	NA	Dr.79547	cryl1	crystallin, lambda 1	crystallin, lambda 1	ZDB-GENE-060810-7	cryl1	2	1	1	2	2	2	21122	9	21572751	21588786
MAD_Dr_004_179913	ENSDART00000047682	2	0	Dr.18824 ; NM_001006093.1	0	1	69185	NA	NA	NA	ENSDARG00000036496	450073	NA	NA	NA	NA	zgc:101621	ZDB-GENE-041010-196	scp2b	2	1	1	2	2	2	21122	NA	NA	NA
MAD_Dr_004_181539	ENSDART00000060483	0	-	-	0	1	72255	NA	NA	NA	ENSDARG00000041260	445562	NA	NA	NA	NA	ST3 beta-galactoside alpha-2,3-sialyltransferase 2	ZDB-GENE-050419-181	st3gal2	2	1	1	2	2	2	21122	NA	NA	NA
MAD_Dr_004_182085	OTTDART00000006911	0	-	-	0	1	73243	NA	NA	NA	ENSDARG00000053119	541525	NA	NA	NA	NA	zgc:113352	ZDB-GENE-050327-61	smpdl3a	2	1	1	2	2	2	21122	20	40440313	40470383
MAD_Dr_004_182465	OTTDART00000038079	0	-	-	0	1	73847	NA	NA	NA	ENSDARG00000037418	445216	NA	NA	NA	NA	similar to nicolin 1; zgc:100984	ZDB-GENE-040801-129	nicn1	2	1	1	2	2	2	21122	NA	NA	NA
MAD_Dr_004_501540	ENSDART00000063019	3	1	gi|501540 ; gi|184522 ; gi|184518	1	1	-2	NA	NA	NA	ENSDARG00000042931	386710	NA	NA	NA	NA	muscle-specific beta 1 integrin binding protein 2	ZDB-GENE-031113-14	mibp2	2	1	1	2	2	2	21122	NA	NA	NA
MAD_Dr_004_184790	Dr.14007	2	0	XM_696197.3 ; ENSDART00000057601	0	1	77449	NA	NA	NA	ENSDARG00000039424	402896	NA	Dr.14007	snrpb2	small nuclear ribonucleoprotein polypeptide B2	small nuclear ribonucleoprotein polypeptide B2	ZDB-GENE-060616-2	snrpb2	2	1	1	2	2	2	21122	1	51067723	51075976
MAD_Dr_004_188771	ENSDART00000052185	3	0	OTTDART00000020629 ; Dr.119358 ; NM_200086.1	0	1	84154	NA	NA	NA	ENSDARG00000035957	368320	NA	NA	NA	NA	geminin, DNA replication inhibitor	ZDB-GENE-030429-30	gmnn	2	1	1	2	2	2	21122	19	31998028	32140417
MAD_Dr_004_187356	ENSDART00000004071	0	-	-	0	1	81173	NA	NA	NA	ENSDARG00000008333	373087	NA	NA	NA	NA	zinc finger-like gene 2a	ZDB-GENE-030828-7	znfl2a	2	1	1	2	2	2	21122	2	129176	133115
MAD_Dr_004_189371	ENSDART00000024722	4	1	ENSDART00000106089 ; Dr.76424 ; NM_001077279.1 ; OTTDART00000027208	0	1	8780	NA	NA	NA	ENSDARG00000010571	768133	NA	NA	NA	NA	enhancer of zeste homolog 2 (Drosophila)	ZDB-GENE-041111-259	ezh2	2	1	1	2	2	2	21122	24	17201102	17220037
MAD_Dr_004_189239	ENSDART00000013682	0	-	-	0	1	87531	NA	NA	NA	ENSDARG00000016717	541329	NA	NA	NA	NA	glycine cleavage system protein H (aminomethyl car	ZDB-GENE-050320-18	gcsha	2	1	1	2	2	2	21122	NA	NA	NA
MAD_Dr_004_189468	Dr.11333	1	1	OTTDART00000024182	0	1	87919	NA	NA	NA	ENSDARG00000074940	352923	NA	Dr.11333	2015-09-01	selenoprotein 15	selenoprotein 15	ZDB-GENE-030327-1	2015-09-01	2	1	1	2	2	2	21122	NA	NA	NA
MAD_Dr_004_190914	ENSDART00000041257	1	1	OTTDART00000022098	0	1	89870	NA	NA	NA	ENSDARG00000033285	492500	NA	NA	NA	NA	zgc:101897	ZDB-GENE-041114-67	gsto2	2	1	1	2	2	2	21122	13	25266446	25272322
MAD_Dr_004_196993	ENSDART00000113589	1	0	Dr.24921	0	1	97313	NA	NA	NA	ENSDARG00000076836	-	NA	NA	NA	NA	glutathione peroxidase 4b	ZDB-GENE-030410-3	gpx4b	2	1	1	2	2	2	21122	2	56518293	56531924
MAD_Dr_004_193997	OTTDART00000028908	1	1	OTTDART00000028907	0	1	94056	NA	NA	NA	ENSDARG00000009178	445257	NA	NA	NA	NA	NA	ZDB-GENE-040801-269	zfand1	2	1	1	2	2	2	21122	24	10942779	10946816
MAD_Dr_004_197816	ENSDART00000055350	2	1	Dr.53223 ; NM_001127307.1	0	1	9813	NA	NA	NA	ENSDARG00000032933	568626	NA	NA	NA	NA	zgc:194800	ZDB-GENE-081022-150	dtx2	2	1	1	2	2	2	21122	5	58883970	58925888
MAD_Dr_004_196434	ENSDART00000006018	2	0	Dr.79124 ; NM_131551.1	0	1	96734	NA	NA	NA	ENSDARG00000017078	58069	NA	NA	NA	NA	mesoderm posterior a	ZDB-GENE-000406-8	mespaa	2	1	1	2	2	2	21122	7	15081532	15084042
MAD_Dr_004_501299	ENSDART00000045253	2	0	gi|501299 ; gi|178629	1	1	-2	NA	NA	NA	ENSDARG00000026376	568448	NA	NA	NA	NA	aconitase 1, soluble	ZDB-GENE-031118-76	aco1	2	1	1	2	2	2	21122	7	71221821	71243376
MAD_Dr_004_501850	ENSDART00000082351	4	1	gi|501850 ; gi|150527 ; gi|146466 ; gi|145644	1	1	-2	NA	NA	NA	ENSDARG00000059279	-	NA	NA	NA	NA	transcription factor AP-2 alpha	ZDB-GENE-011212-6	tfap2a	2	1	1	2	2	2	21122	24	8581299	8592141
MAD_Dr_004_503039	ENSDART00000114492	2	1	gi|503039 ; gi|184159	1	1	-2	NA	NA	NA	ENSDARG00000075092	560708	NA	NA	NA	NA	sc:d808	ZDB-GENE-080303-19	si:dkey-52l18.4	2	1	1	2	2	2	21122	15	29389327	29393378
MAD_Dr_004_100988	OTTDART00000013182	2	0	XM_001338457.1 ; XM_001918973.1	0	1	101082	NA	NA	NA	ENSDARG00000069958	573284	NA	NA	NA	NA	si:dkeyp-1e8.2; similar to SH2B adapter protein 3 (Lymphocyte-specific adapter protein Lnk) (Signal transduction protein Lnk) (Lymphocyte adapter protein)	ZDB-GENE-041210-359	sh2b3	2	1	1	2	2	2	21122	5	9050688	9120857
MAD_Dr_004_105319	ENSDART00000113904	0	-	-	0	1	105487	NA	NA	NA	ENSDARG00000076117	-	NA	NA	NA	NA	NA	NA	NA	2	1	1	2	2	2	21122	7	11353535	11363455
MAD_Dr_004_113817	OTTDART00000026097	0	-	-	0	1	114245	NA	NA	NA	ENSDARG00000021547	394145	NA	NA	NA	NA	NA	ZDB-GENE-040426-1046	vrk2	2	1	1	2	2	2	21122	13	26649554	26668794
MAD_Dr_004_114020	OTTDART00000042269	2	0	ENSDART00000109774 ; ENSDART00000012284	0	1	114436	NA	NA	NA	ENSDARG00000034070	386638	NA	NA	NA	NA	NA	ZDB-GENE-031030-8	cyp2aa3	2	1	1	2	2	2	21122	NA	NA	NA
MAD_Dr_004_134023	OTTDART00000026302 ; ENSDART00000100622 ; ENSDART00000046338	2	0	Dr.79496 ; NM_001039828.1	0	1	13362	NA	NA	NA	ENSDARG00000032010	556684	NA	NA	NA	NA	solute carrier family 15 (H+/peptide transporter), member 2	ZDB-GENE-030131-5866	slc15a2	2	1	1	2	2	2	21122	9	37510427	37529861
MAD_Dr_004_141065	ENSDART00000079340 ; ENSDART00000079718	1	1	ENSDART00000029125	0	1	140615	NA	NA	NA	ENSDARG00000057121	570832	NA	NA	NA	NA	similar to LOC570832 protein; complement component 7	ZDB-GENE-021120-1	c7b	2	1	1	2	2	2	21122	21	20864869	20878655
MAD_Dr_004_188164	OTTDART00000043661	0	-	-	0	1	8257	NA	NA	NA	ENSDARG00000075954	555328	NA	NA	NA	NA	zgc:171630	ZDB-GENE-080219-21	serpinh1a	2	1	1	2	2	2	21122	10	38568512	38577952
MAD_Dr_004_148126	XM_685166.3 ; Dr.78040	0	1		0	1	21955	XM_685166.3	XM_685166	NA	ENSDARG00000079525	-	NA	Dr.78040	slc39a5	solute carrier family 39 (zinc transporter), membe	solute carrier family 39 (zinc transporter), membe	ZDB-GENE-060608-1	slc39a5	2	1	1	2	2	2	21122	23	32409340	32425648
MAD_Dr_004_159337	OTTDART00000017651	0	-	-	0	1	38702	NA	NA	NA	ENSDARG00000057741	436847	NA	NA	NA	NA	NA	ZDB-GENE-040718-313	nr1h4	2	1	1	2	2	2	21122	18	15676047	15698430
MAD_Dr_004_162459	XM_692045.2	0	-	-	0	1	43026	XM_692045.2	XM_692045	NA	ENSDARG00000040610	568699	NA	NA	NA	NA	similar to Cystine/glutamate transporter (Amino acid transport system xc-) (xCT) (Solute carrier family 7 member 11) (Calcium channel blocker resistance protein CCBR1)	ZDB-GENE-140106-36	zmp:0000001076	2	1	1	2	2	2	21122	4	5789653	5801524
MAD_Dr_004_165351	OTTDART00000039683	2	0	ENSDART00000112269 ; OTTDART00000039684	0	1	47123	NA	NA	NA	ENSDARG00000014053	445092	NA	NA	NA	NA	olfactomedin 1b; olfactomedin 1a	ZDB-GENE-040801-228	olfm1b	2	1	1	2	2	2	21122	21	6829154	6891310
MAD_Dr_004_170168	ENSDART00000026551	3	1	Dr.80390 ; NM_001014326.1 ; OTTDART00000027427	0	1	54339	NA	NA	NA	ENSDARG00000010318	541513	NA	NA	NA	NA	sushi-repeat-containing protein	ZDB-GENE-050327-43	srpx	2	1	1	2	2	2	21122	9	30483327	30506044
MAD_Dr_004_171172	ENSDART00000088827	3	1	OTTDART00000030159 ; ENSDART00000037891 ; OTTDART00000030158	0	1	55843	NA	NA	NA	ENSDARG00000027750	-	NA	NA	NA	NA	dipeptidyl-peptidase 7	ZDB-GENE-050306-16	dpp7	2	1	1	2	2	2	21122	5	28559758	28577119
MAD_Dr_004_171832	ENSDART00000065349	0	-	-	0	1	56932	NA	NA	NA	ENSDARG00000054658	565599	NA	NA	NA	NA	NA	ZDB-GENE-101006-4	slc34a1b	2	1	1	2	2	2	21122	21	32973558	32999458
MAD_Dr_004_172318	ENSDART00000020538	0	-	-	0	1	57618	NA	NA	NA	ENSDARG00000070020	790957	NA	NA	NA	NA	zgc:195056	ZDB-GENE-080724-3	cyp2aa9	2	1	1	2	2	2	21122	NA	NA	NA
MAD_Dr_004_181141	ENSDART00000008133	0	-	-	0	1	71453	NA	NA	NA	ENSDARG00000002897	555899	NA	NA	NA	NA	NA	NA	NA	2	1	1	2	2	2	21122	11	2547570	2563393
MAD_Dr_004_189142	ENSDART00000097307	7	0	Dr.145037 ; NM_001001846.1 ; OTTDART00000038437 ; OTTDART00000038436 ; XM_001921411.1 ; Dr.110739 ; XM_680303.3	0	1	87182	NA	NA	NA	ENSDARG00000067591	415106	NA	NA	NA	NA	purine-rich element binding protein A; similar to purine-rich element binding protein A	ZDB-GENE-040624-8	pura	2	1	1	2	2	2	21122	21	28687404	28692430
MAD_Dr_004_189772	NM_001004624.1	2	1	ENSDART00000081234 ; Dr.85577	0	1	88323	NM_001004624.1	NM_001004624	si:rp71-1f1.7	ENSDARG00000058370	798354	si:rp71-1f1.7	NA	NA	NA	si:rp71-1f1.7	ZDB-GENE-040724-235	ropn1l	2	1	1	2	2	2	21122	24	21876501	21885903
MAD_Dr_004_189943	OTTDART00000028865	1	1	Dr.28451	0	1	88544	NA	NA	NA	ENSDARG00000070844	796865	NA	NA	NA	NA	guanidinoacetate N-methyltransferase	ZDB-GENE-051030-97	gamt	2	1	1	2	2	2	21122	11	5858668	5868489
MAD_Dr_004_192245	ENSDART00000098184	8	0	XM_001920921.1 ; ENSDART00000081435 ; XM_687263.3 ; Dr.131630 ; ENSDART00000056178 ; Dr.149598 ; XM_694250.3 ; XM_001920199.1	0	1	91717	NA	NA	NA	ENSDARG00000094307	100148207	NA	NA	NA	NA	NA	ZDB-GENE-091204-254	si:ch211-8c17.2	2	1	1	2	2	2	21122	NA	NA	NA
MAD_Dr_004_179718	OTTDART00000041204	0	-	-	0	1	6889	NA	NA	NA	ENSDARG00000003046	571008	NA	NA	NA	NA	NA	ZDB-GENE-070308-2	sorbs2a	2	1	1	2	2	2	21122	1	17054719	17110677
MAD_Dr_004_173162	OTTDART00000045346	0	-	-	0	1	58921	NA	NA	NA	ENSDARG00000078983	-	NA	NA	NA	NA	NA	ZDB-GENE-060810-6	fam118b	2	1	1	2	2	2	21122	18	44802258	44827292
MAD_Dr_004_140377	ENSDART00000106148 ; OTTDART00000021412	0	1		0	1	139977	NA	NA	NA	ENSDARG00000071680	567769	NA	NA	NA	NA	lysyl oxidase-like 5a	ZDB-GENE-070705-186	loxl5a	2	1	1	2	2	2	21122	22	4739104	4745649
MAD_Dr_004_141010	ENSDART00000047920	1	1	OTTDART00000037633	0	1	140564	NA	NA	NA	ENSDARG00000011257	393575	NA	NA	NA	NA	ectonucleotide pyrophosphatase/phosphodiesterase 2	ZDB-GENE-040426-1156	enpp2	2	1	1	2	2	2	21122	16	9718819	9771303
MAD_Dr_004_152306	OTTDART00000015806	0	-	-	0	1	27588	NA	NA	NA	ENSDARG00000010758	799247	NA	NA	NA	NA	NA	ZDB-GENE-050419-245	capn12	2	1	1	2	2	2	21122	18	36683646	36748629
MAD_Dr_004_157569	ENSDART00000066471	2	1	Dr.82301 ; XM_001344564.2	0	1	36056	NA	NA	NA	ENSDARG00000057644	100005593	NA	NA	NA	NA	a disintegrin and metalloproteinase domain 8b	ZDB-GENE-070808-1	adam8b	2	1	1	2	2	2	21122	12	9059120	9094839
MAD_Dr_004_164117	ENSDART00000089351	2	1	NM_001077761.1 ; OTTDART00000044666	0	1	45272	NA	NA	NA	ENSDARG00000062087	777713	NA	NA	NA	NA	zgc:153038	ZDB-GENE-061110-43	nceh1b	2	1	1	2	2	2	21122	24	26816589	26823538
MAD_Dr_004_164556	OTTDART00000012657 ; ENSDART00000057459 ; NM_001044711.1 ; Dr.132955	0	1		0	1	45912	NM_001044711.1	NM_001044711	zgc:136778	ENSDARG00000080004	557392	zgc:136778	Dr.132955	zgc:136778	zgc:136778	zgc:136778	ZDB-GENE-060421-8366	trim35-24	2	1	1	2	2	2	21122	NA	NA	NA
MAD_Dr_004_167468	XM_001338976.2 ; Dr.120312	1	1	OTTDART00000042331	0	1	50172	XM_001338976.2	XM_001338976	NA	ENSDARG00000041417	100004566	NA	Dr.120312	si:ch211-117k14.5	si:ch211-117k14.5	hypothetical protein LOC100004566	ZDB-GENE-090312-136	atp6ap1a	2	1	1	2	2	2	21122	23	4963653	4979533
MAD_Dr_004_173017	NM_001089502.1 ; Dr.75678	1	1	ENSDART00000065475	0	1	58724	NM_001089502.1	NM_001089502	zp2l2	ENSDARG00000004898	559251	zona pellucida glycoprotein 2, like 2	Dr.75678	zp2l2	zona pellucida glycoprotein 2, like 2	zona pellucida glycoprotein 2, like 2	ZDB-GENE-060818-4	zp2l2	2	1	1	2	2	2	21122	6	9709764	9716564
MAD_Dr_004_175059	OTTDART00000034953	1	1	XM_694721.3	0	1	61688	NA	NA	NA	ENSDARG00000075974	571152	NA	NA	NA	NA	NA	ZDB-GENE-050809-43	si:dkey-258f14.3	2	1	1	2	2	2	21122	8	13605281	13709925
MAD_Dr_004_175463	OTTDART00000035923	0	-	-	0	1	62333	NA	NA	NA	ENSDARG00000053509	8388607	NA	NA	NA	NA	NA	ZDB-GENE-050208-155	kazald3	2	1	1	2	2	2	21122	8	42602990	42617667
MAD_Dr_004_179438	NM_001102569.1 ; Dr.19737	1	1	ENSDART00000112006	0	1	6848	NM_001102569.1	NM_001102569	radil	ENSDARG00000079779	562363	Rap GTPase interactor	Dr.19737	radil	Rap GTPase interactor	Rap GTPase interactor	ZDB-GENE-071206-1	radil	2	1	1	2	2	2	21122	1	7163652	7210144
MAD_Dr_004_181355	OTTDART00000018163	0	-	-	0	1	71965	NA	NA	NA	ENSDARG00000007186	-	NA	NA	NA	NA	NA	ZDB-GENE-060503-681	ppp1r8a	2	1	1	2	2	2	21122	19	15617635	15628153
MAD_Dr_004_137708	OTTDART00000007266	1	1	XM_001919412.1	0	1	137176	NA	NA	NA	ENSDARG00000052465	8388607	NA	NA	NA	NA	NA	NA	NA	2	1	1	2	2	2	21122	20	52105402	52133916
MAD_Dr_004_168710	NM_001110374.1 ; Dr.148688	3	0	OTTDART00000043661 ; ENSDART00000112982 ; ENSDART00000109752	0	1	51982	NM_001110374.1	NM_001110374	zgc:171630	ENSDARG00000076193	555328	zgc:171630	Dr.148688	zgc:171630	zgc:171630	zgc:171630	ZDB-GENE-080219-21	serpinh1a	2	1	1	2	2	2	21122	NA	NA	NA
MAD_Dr_004_167617	XM_687846.3 ; Dr.151262	0	1		0	1	5038	XM_687846.3	XM_687846	NA	ENSDARG00000077404	564519	NA	Dr.151262	ncoa3	nuclear receptor coactivator 3	nuclear receptor coactivator 3	ZDB-GENE-051107-8	ncoa3	2	1	1	2	2	2	21122	11	18450079	18537227
MAD_Dr_004_189650	OTTDART00000043886	0	-	-	0	1	88167	NA	NA	NA	ENSDARG00000009386	-	NA	NA	NA	NA	NA	NA	NA	2	1	1	2	2	2	21122	21	18939987	18956474
MAD_Dr_004_501453	ENSDART00000057699	4	0	gi|501453 ; gi|163995 ; gi|163548 ; gi|157365	1	1	-2	NA	NA	NA	ENSDARG00000004262	393433	NA	NA	NA	NA	NA	ZDB-GENE-040426-1184	cyp46a1.2	2	1	1	2	2	2	21122	20	5192739	5223338
MAD_Dr_004_102626	ENSDART00000080290	0	-	-	0	1	102766	NA	NA	NA	ENSDARG00000057593	-	NA	NA	NA	NA	NA	NA	NA	2	1	1	2	1	2	21121	NA	NA	NA
MAD_Dr_004_175390	OTTDART00000029226 ; NM_001007445.1 ; Dr.85356 ; ENSDART00000025612	0	1		0	1	62198	NM_001007445.1	NM_001007445	phyhd1	ENSDARG00000029905	492804	phytanoyl-CoA dioxygenase domain containing 1	Dr.85356	phyhd1	phytanoyl-CoA dioxygenase domain containing 1	phytanoyl-CoA dioxygenase domain containing 1	ZDB-GENE-041114-159	phyhd1	2	1	1	2	1	2	21121	21	4344394	4360515
MAD_Dr_004_108786	ENSDART00000008904	0	-	-	0	1	109029	NA	NA	NA	ENSDARG00000018345	556756	NA	NA	NA	NA	NA	ZDB-GENE-060810-178	dapk2b	2	1	1	2	1	2	21121	NA	NA	NA
MAD_Dr_004_114428	ENSDART00000090534	1	1	XM_685806.3	0	1	11485	NA	NA	NA	ENSDARG00000062518	100170793	NA	NA	NA	NA	unc-51-like kinase 1a (C. elegans)	ZDB-GENE-080723-31	ulk1a	2	1	1	2	1	2	21121	8	43741528	43782435
MAD_Dr_004_141058	ENSDART00000063071 ; ENSDART00000108551	3	1	Dr.84148 ; NM_001002656.2 ; OTTDART00000028645	0	1	140609	NA	NA	NA	ENSDARG00000042962	-	NA	NA	NA	NA	NA	ZDB-GENE-040718-404	dgcr2	2	1	1	2	1	2	21121	10	42215840	42258850
MAD_Dr_004_142891	NM_001127465.1 ; Dr.99636	1	0	ENSDART00000099448	0	1	1498	NM_001127465.1	NM_001127465	zgc:175140	ENSDARG00000076417	324863	zgc:175140	Dr.99636	zgc:175140	zgc:175140	zgc:175140; similar to mKIAA1961 protein	ZDB-GENE-030131-3586	fnip1	2	1	1	2	1	2	21121	NA	NA	NA
MAD_Dr_004_145962	NM_201084.2	0	-	-	0	1	18957	NM_201084.2	NM_201084	cdc5l	ENSDARG00000043797	394059	CDC5 cell division cycle 5-like (S. pombe)	NA	NA	NA	CDC5 cell division cycle 5-like (S. pombe)	ZDB-GENE-040426-821	cdc5l	2	1	1	2	1	2	21121	17	4903020	4947809
MAD_Dr_004_500062	Dr.115420	4	0	gi|503438 ; gi|500062 ; gi|159930 ; gi|150086	1	1	-2	NA	NA	NA	ENSDARG00000021097	394165	NA	Dr.115420	th1l	TH1-like (Drosophila)	TH1-like (Drosophila)	ZDB-GENE-040426-720	nelfcd	2	1	1	2	1	2	21121	6	49783231	49802520
MAD_Dr_004_154190	OTTDART00000010334 ; ENSDART00000037069 ; NM_001044896.1 ; Dr.13979	0	1		0	1	30612	NM_001044896.1	NM_001044896	usp49	ENSDARG00000000229	559473	ubiquitin specific peptidase 49	Dr.13979	usp49	ubiquitin specific peptidase 49	ubiquitin specific peptidase 49	ZDB-GENE-050208-484	usp49	2	1	1	2	1	2	21121	22	530011	546478
MAD_Dr_004_156302	NM_001020762.1 ; Dr.20507	3	0	ENSDART00000106517 ; ENSDART00000048256 ; OTTDART00000027751	0	1	34331	NM_001020762.1	NM_001020762	zgc:112184	ENSDARG00000078858	553800	zgc:112184	Dr.20507	zgc:112184	zgc:112184	zgc:112184	ZDB-GENE-050522-222	cep55l	2	1	1	2	1	2	21121	NA	NA	NA
MAD_Dr_004_156717	Dr.140766	0	-	-	0	1	34922	NA	NA	NA	ENSDARG00000058372	678616	NA	Dr.140766	zgc:136403	zgc:136403	zgc:136403	ZDB-GENE-060421-6122	mcph1	2	1	1	2	1	2	21121	13	6158134	6195551
MAD_Dr_004_157983	ENSDART00000014753	0	-	-	0	1	36704	NA	NA	NA	ENSDARG00000015403	-	NA	NA	NA	NA	Rho GTPase activating protein 11A	NA	NA	2	1	1	2	1	2	21121	NA	NA	NA
MAD_Dr_004_166073	ENSDART00000067608	2	0	NM_001045288.2 ; Dr.106070	0	1	48176	NA	NA	NA	ENSDARG00000030964	692319	NA	NA	NA	NA	zgc:136374	ZDB-GENE-060519-25	pde12	2	1	1	2	1	2	21121	11	42215490	42234888
MAD_Dr_004_161460	NM_212608.1 ; Dr.99	1	1	ENSDART00000025910	0	1	41554	NM_212608.1	NM_212608	bscv	ENSDARG00000017422	266637	bscv (C20orf3) homolog	Dr.99	bscv	bscv (C20orf3) homolog	bscv (C20orf3) homolog	ZDB-GENE-020919-1	apmap	2	1	1	2	1	2	21121	13	6091091	6110756
MAD_Dr_004_185443	NM_131200.1 ; OTTDART00000002429	2	0	ENSDART00000035967 ; Dr.75177	0	1	7845	NM_131200.1	NM_131200	brd2a	ENSDARG00000022280	30445	bromodomain-containing 2a	NA	NA	NA	bromodomain-containing 2a	ZDB-GENE-990415-248	brd2a	2	1	1	2	1	2	21121	19	7234041	7251749
MAD_Dr_004_165071	ENSDART00000054290	3	0	NM_213093.1 ; OTTDART00000038341 ; Dr.1142	0	1	46704	NA	NA	NA	ENSDARG00000037318	406408	NA	NA	NA	NA	dolichyl-diphosphooligosaccharide-protein glycosyltransferase	ZDB-GENE-040426-2147	ddost	2	1	1	2	1	2	21121	23	24300745	24307820
MAD_Dr_004_167580	NM_213157.1 ; Dr.76663	0	1		0	1	50332	NM_213157.1	NM_213157	slc25a33	ENSDARG00000039931	406436	solute carrier family 25, member 33	Dr.76663	slc25a33	solute carrier family 25, member 33	solute carrier family 25, member 33	ZDB-GENE-040426-2183	slc25a33	2	1	1	2	1	2	21121	23	29934702	29952102
MAD_Dr_004_176514	ENSDART00000108763	1	1	OTTDART00000037961	0	1	63906	NA	NA	NA	ENSDARG00000055278	30604	NA	NA	NA	NA	zgc:153240	ZDB-GENE-980526-487	cfb	2	1	1	2	1	2	21121	21	27379589	27394702
MAD_Dr_004_500722	Dr.30882	4	1	gi|503157 ; gi|500722 ; gi|177491 ; gi|170057	1	1	-2	NA	NA	NA	ENSDARG00000043081	450022	NA	Dr.30882	ctsz	cathepsin Z	cathepsin Z	ZDB-GENE-041010-139	ctsz	2	1	1	2	1	2	21121	6	49772719	49782709
MAD_Dr_004_182546	OTTDART00000035695	0	-	-	0	1	73967	NA	NA	NA	ENSDARG00000092123	556245	NA	NA	NA	NA	NA	ZDB-GENE-081104-365	si:dkey-20d21.12	2	1	1	2	1	2	21121	8	26363465	26368951
MAD_Dr_004_503142	NM_001004018.1	3	1	gi|503142 ; gi|184921 ; gi|180234	1	1	-2	NM_001004018.1	NM_001004018	gipc1	ENSDARG00000010771	445568	GIPC PDZ domain containing family, member 1	NA	NA	NA	GIPC PDZ domain containing family, member 1	ZDB-GENE-060726-1	gipc1	2	1	1	2	1	2	21121	NA	NA	NA
MAD_Dr_004_186997	ENSDART00000027329	0	-	-	0	1	80728	NA	NA	NA	ENSDARG00000015551	58108	NA	NA	NA	NA	ferritin, heavy polypeptide 1	ZDB-GENE-000831-2	fth1a	2	1	1	2	1	2	21121	7	12675224	12683988
MAD_Dr_004_189477	NM_001006051.1	0	-	-	0	1	87927	NM_001006051.1	NM_001006051	zgc:101803	ENSDARG00000040707	450030	zgc:101803	NA	NA	NA	zgc:101803	ZDB-GENE-041010-149	zgc:101803	2	1	1	2	1	2	21121	6	40062873	40065928
MAD_Dr_004_105593	NM_131564.1 ; Dr.79604	0	1		0	1	10576	NM_131564.1	NM_131564	appa	ENSDARG00000059036	58083	amyloid beta (A4) precursor protein a	Dr.79604	appa	amyloid beta (A4) precursor protein a	amyloid beta (A4) precursor protein a	ZDB-GENE-000616-13	appa	2	1	1	2	1	2	21121	NA	NA	NA
MAD_Dr_004_148671	OTTDART00000042306	0	-	-	0	1	22706	NA	NA	NA	ENSDARG00000014179	447836	NA	NA	NA	NA	NA	ZDB-GENE-040912-135	pfkma	2	1	1	2	1	2	21121	23	27627245	27645126
MAD_Dr_004_153449	Dr.29127	0	-	-	0	1	29321	NA	NA	NA	ENSDARG00000022681	692256	NA	Dr.29127	zgc:136471	zgc:136471	zgc:136471	ZDB-GENE-060512-59	pold3	2	1	1	2	1	2	21121	NA	NA	NA
MAD_Dr_004_170401	ENSDART00000023506	1	1	XM_679175.3	0	1	54660	NA	NA	NA	ENSDARG00000016963	-	NA	NA	NA	NA	NA	NA	NA	2	1	1	2	1	2	21121	6	48979549	49050366
MAD_Dr_004_171745	OTTDART00000023387	0	-	-	0	1	56780	NA	NA	NA	ENSDARG00000059154	8388607	NA	NA	NA	NA	NA	NA	NA	2	1	1	2	1	2	21121	NA	NA	NA
MAD_Dr_004_188584	OTTDART00000043934	0	-	-	0	1	83323	NA	NA	NA	ENSDARG00000092538	359830	NA	NA	NA	NA	fibroblast growth factor 10a	ZDB-GENE-091204-138	si:ch211-262i10.2	2	1	1	2	1	2	21121	21	19595615	19649043
MAD_Dr_004_503336	NM_001130650.1	4	0	gi|503336 ; gi|198352 ; gi|187024 ; gi|187021	1	1	-2	NM_001130650.1	NM_001130650	zgc:193598	ENSDARG00000031489	100170815	zgc:193598	NA	NA	NA	similar to Mimecan precursor (Osteoglycin); zgc:193598	ZDB-GENE-080723-61	zgc:193598	2	1	1	2	1	2	21121	23	19750022	19760320
MAD_Dr_004_115252	OTTDART00000036787	4	1	NM_001098749.1 ; OTTDART00000012884 ; ENSDART00000108873 ; ENSDART00000060395	0	1	115684	NA	NA	NA	ENSDARG00000041199	569494	NA	NA	NA	NA	asparagine-linked glycosylation 12 homolog (yeast, alpha-1,6-mannosyltransferase)	ZDB-GENE-041210-295	alg12	2	1	1	1	3	3	21113	4	27111240	27120460
MAD_Dr_004_100599	OTTDART00000036207	5	0	NM_001109710.1 ; OTTDART00000036205 ; Dr.151165 ; OTTDART00000036208 ; Dr.113580	0	1	100669	NA	NA	NA	ENSDARG00000090118	8388607	NA	NA	NA	NA	NA	NA	NA	2	1	1	1	3	3	21113	1	23685565	23700844
MAD_Dr_004_132779	ENSDART00000077807	0	-	-	0	1	132357	NA	NA	NA	ENSDARG00000055446	-	NA	NA	NA	NA	NA	NA	NA	2	1	1	1	3	3	21113	16	23974539	23975519
MAD_Dr_004_184552	ENSDART00000081851	4	1	NM_199779.1 ; ENSDART00000018868 ; OTTDART00000027206 ; Dr.77341	0	1	77033	NA	NA	NA	ENSDARG00000018491	-	NA	NA	NA	NA	protein disulfide isomerase associated 4	ZDB-GENE-030131-5493	pdia4	2	1	1	1	2	2	21112	24	17190259	17197039
MAD_Dr_004_103540	ENSDART00000100756	2	1	NM_001105597.1 ; Dr.108030	0	1	103670	NA	NA	NA	ENSDARG00000069314	100001648	NA	NA	NA	NA	transmembrane protein 199	ZDB-GENE-050522-150	tmem199	2	1	1	1	2	2	21112	15	24738018	24741050
MAD_Dr_004_105584	OTTDART00000027606	2	1	OTTDART00000027605 ; ENSDART00000111130	0	1	105747	NA	NA	NA	ENSDARG00000053155	553725	NA	NA	NA	NA	NA	ZDB-GENE-050522-334	alg3	2	1	1	1	2	2	21112	2	45119722	45128346
MAD_Dr_004_187988	XM_001923824.1 ; OTTDART00000025494	4	0	OTTDART00000025491 ; OTTDART00000025493 ; NM_001002511.1 ; Dr.79020	0	1	82287	XM_001923824.1	XM_001923824	NA	ENSDARG00000002690	436784	NA	NA	NA	NA	RAB interacting factor; similar to RAB interacting factor; hypothetical LOC791824	ZDB-GENE-040718-216	rabif	2	1	1	1	2	2	21112	11	24578051	24580021
MAD_Dr_004_106713	ENSDART00000113465	1	1	XM_691690.3	0	1	106921	NA	NA	NA	ENSDARG00000040284	568363	NA	NA	NA	NA	NA	NA	NA	2	1	1	1	2	2	21112	16	24904086	24917006
MAD_Dr_004_502311	ENSDART00000104657	3	0	gi|502311 ; gi|123670 ; gi|180245	1	1	-2	NA	NA	NA	ENSDARG00000070985	100073334	NA	NA	NA	NA	zgc:163126	ZDB-GENE-070615-13	mrps21	2	1	1	1	2	2	21112	19	9039209	9043981
MAD_Dr_004_112091	OTTDART00000035601	2	1	Dr.81463 ; ENSDART00000077895	0	1	112416	NA	NA	NA	ENSDARG00000055524	503534	NA	NA	NA	NA	ring finger protein 7	ZDB-GENE-050220-12	rnf7	2	1	1	1	2	2	21112	18	41767071	41775906
MAD_Dr_004_113617	ENSDART00000105140	2	1	XM_001922729.1 ; XM_001920321.1	0	1	114035	NA	NA	NA	ENSDARG00000071211	553695	NA	NA	NA	NA	zgc:112255	ZDB-GENE-050522-57	zgc:112255	2	1	1	1	2	2	21112	11	38843065	38850387
MAD_Dr_004_129094	OTTDART00000005318	0	-	-	0	1	129004	NA	NA	NA	ENSDARG00000092873	8388607	NA	NA	NA	NA	NA	ZDB-GENE-041001-108	si:ch211-253p18.4	2	1	1	1	2	2	21112	20	20826558	20830541
MAD_Dr_004_130071	ENSDART00000052787	1	1	ENSDART00000113054	0	1	12988	NA	NA	NA	ENSDARG00000036338	565852	NA	NA	NA	NA	zgc:112329	ZDB-GENE-050731-5	vps11	2	1	1	1	2	2	21112	10	29864689	29882216
MAD_Dr_004_178366	ENSDART00000065933	2	1	Dr.67044 ; XM_695633.3	0	1	66761	NA	NA	NA	ENSDARG00000002494	571984	NA	NA	NA	NA	similar to integrin, beta 6	ZDB-GENE-100812-2	itgb6	2	1	1	1	2	2	21112	11	10991789	11035637
MAD_Dr_004_159581	OTTDART00000040073	0	-	-	0	1	3903	NA	NA	NA	ENSDARG00000030790	393591	NA	NA	NA	NA	NA	ZDB-GENE-040426-1249	zgc:63733	2	1	1	1	2	2	21112	NA	NA	NA
MAD_Dr_004_154130	NM_001113597.1	0	-	-	0	1	30543	NM_001113597.1	NM_001113597	eif2b5	ENSDARG00000074995	563613	eukaryotic translation initiation factor 2B, subun	NA	NA	NA	eukaryotic translation initiation factor 2B, subunit 5 epsilon	ZDB-GENE-030131-5364	eif2b5	2	1	1	1	2	2	21112	2	3062141	3075308
MAD_Dr_004_154271	NM_199775.1	0	-	-	0	1	30714	NM_199775.1	NM_199775	zgc:55652	ENSDARG00000008384	327253	zgc:55652	NA	NA	NA	histone deacetylase 6; zgc:55652	ZDB-GENE-030131-3232	hdac6	2	1	1	1	2	2	21112	8	7374704	7425659
MAD_Dr_004_156337	ENSDART00000003839	1	1	OTTDART00000024187	0	1	34379	NA	NA	NA	ENSDARG00000019233	-	NA	NA	NA	NA	thimet oligopeptidase 1	ZDB-GENE-041010-216	nln	2	1	1	1	2	2	21112	10	15450471	15489467
MAD_Dr_004_160057	NM_173239.1 ; Dr.76904 ; ENSDART00000113837 ; ENSDART00000067721	0	1		0	1	39687	NM_173239.1	NM_173239	mak16	ENSDARG00000003527	192312	MAK16 homolog (S. cerevisiae)	Dr.76904	mak16	MAK16 homolog (S. cerevisiae)	hypothetical protein LOC100149753; MAK16 homolog (S. cerevisiae)	ZDB-GENE-020419-35	mak16	2	1	1	1	2	2	21112	8	45387035	45408308
MAD_Dr_004_174235	ENSDART00000091377	2	0	Dr.67256 ; XM_688529.3	0	1	60472	NA	NA	NA	ENSDARG00000062872	565251	NA	NA	NA	NA	similar to MGC166254 protein	NA	NA	2	1	1	1	2	2	21112	16	10373384	10402035
MAD_Dr_004_162767	OTTDART00000029763	0	-	-	0	1	43465	NA	NA	NA	ENSDARG00000030630	492810	NA	NA	NA	NA	NA	ZDB-GENE-041114-166	mfsd2aa	2	1	1	1	2	2	21112	13	35766544	35828850
MAD_Dr_004_166832	ENSDART00000113545 ; ENSDART00000062049 ; OTTDART00000039669	0	1		0	1	49281	NA	NA	NA	ENSDARG00000097473	541508	NA	NA	NA	NA	NA	ZDB-GENE-050327-34	zgc:113340	2	1	1	1	2	2	21112	18	46164186	46170197
MAD_Dr_004_168435	NM_001013346.1	0	-	-	0	1	51602	NM_001013346.1	NM_001013346	zgc:113098	ENSDARG00000052780	503768	zgc:113098	NA	NA	NA	zgc:113098	ZDB-GENE-050306-52	zgc:113098	2	1	1	1	2	2	21112	NA	NA	NA
MAD_Dr_004_170429	NM_001017900.1	0	-	-	0	1	54712	NM_001017900.1	NM_001017900	zgc:110602	ENSDARG00000020981	550599	zgc:110602	NA	NA	NA	zgc:110602	ZDB-GENE-050417-460	slc35a3b	2	1	1	1	2	2	21112	2	10192671	10242444
MAD_Dr_004_180151	OTTDART00000037209	1	1	NM_153668.4	0	1	69538	NA	NA	NA	ENSDARG00000040988	560753	NA	NA	NA	NA	triosephosphate isomerase 1b	ZDB-GENE-020416-4	tpi1b	2	1	1	1	2	2	21112	16	12345335	12364092
MAD_Dr_004_177631	OTTDART00000017656	2	1	OTTDART00000017657 ; ENSDART00000080517	0	1	65633	NA	NA	NA	ENSDARG00000057767	378990	NA	NA	NA	NA	NA	ZDB-GENE-031010-33	nudt4a	2	1	1	1	2	2	21112	18	15827236	15868830
MAD_Dr_004_176348	ENSDART00000102122	0	-	-	0	1	63658	NA	NA	NA	ENSDARG00000042583	799904	NA	NA	NA	NA	NA	NA	NA	2	1	1	1	2	2	21112	NA	NA	NA
MAD_Dr_004_179912	OTTDART00000025505	0	-	-	0	1	69184	NA	NA	NA	ENSDARG00000029510	386636	NA	NA	NA	NA	translocase of inner mitochondrial membrane 17 homolog A (yeast)	ZDB-GENE-031030-6	timm17a	2	1	1	1	2	2	21112	11	24662507	24668648
MAD_Dr_004_181093	NM_200555.1 ; Dr.28239	1	0	ENSDART00000046902	0	1	71311	NM_200555.1	NM_200555	pdcd10a	ENSDARG00000035054	393527	programmed cell death 10a	Dr.28239	pdcd10a	programmed cell death 10a	programmed cell death 10a	ZDB-GENE-040426-1432	pdcd10a	2	1	1	1	2	2	21112	18	4981072	5004911
MAD_Dr_004_183142	ENSDART00000075187	1	1	OTTDART00000029199	0	1	74903	NA	NA	NA	ENSDARG00000053194	405893	NA	NA	NA	NA	PDZ domain containing 11	ZDB-GENE-040426-2544	pdzd11	2	1	1	1	2	2	21112	14	32923989	32928174
MAD_Dr_004_183671	OTTDART00000029627	0	-	-	0	1	75761	NA	NA	NA	ENSDARG00000039435	436796	NA	NA	NA	NA	NA	ZDB-GENE-040718-229	rgs17	2	1	1	1	2	2	21112	13	23597703	23626276
MAD_Dr_004_185365	ENSDART00000018036 ; NM_200166.2 ; Dr.80537	0	1		0	1	78340	NM_200166.2	NM_200166	zgc:55621	ENSDARG00000010782	393135	zgc:55621	Dr.80537	zgc:55621	zgc:55621	zgc:55621	ZDB-GENE-040426-762	zgc:55621	2	1	1	1	2	2	21112	15	35082153	35102957
MAD_Dr_004_186089	OTTDART00000022732	1	0	NM_001003650.1	0	1	79401	NA	NA	NA	ENSDARG00000022340	445256	NA	NA	NA	NA	hypothetical LOC791600; ubiquitin-fold modifier conjugating enzyme 1	ZDB-GENE-040801-268	ufc1	2	1	1	1	2	2	21112	5	57045397	57048633
MAD_Dr_004_187501	NM_001082953.1 ; Dr.91619	0	1		0	1	81405	NM_001082953.1	NM_001082953	zgc:162898	ENSDARG00000069240	100003490	zgc:162898	Dr.91619	zgc:162898	zgc:162898	zgc:162898	ZDB-GENE-070410-107	zgc:162898	2	1	1	1	2	2	21112	18	19893865	19894909
MAD_Dr_004_113340	OTTDART00000043304	0	-	-	0	1	113727	NA	NA	NA	ENSDARG00000077740	-	NA	NA	NA	NA	NA	ZDB-GENE-091204-128	b3galtlb	2	1	1	1	2	2	21112	10	33682484	33766367
MAD_Dr_004_150115	OTTDART00000024891	0	-	-	0	1	24582	NA	NA	NA	ENSDARG00000038569	58072	NA	NA	NA	NA	NA	ZDB-GENE-000328-4	fzd8b	2	1	1	1	2	2	21112	2	48100996	48103509
MAD_Dr_004_165052	OTTDART00000030979	0	-	-	0	1	46678	NA	NA	NA	ENSDARG00000004396	791470	NA	NA	NA	NA	NA	ZDB-GENE-041010-166	b3gnt5b	2	1	1	1	2	2	21112	2	7951389	7959268
MAD_Dr_004_167616	NM_199675.1	1	0	ENSDART00000097874	0	1	50379	NM_199675.1	NM_199675	zgc:63734	ENSDARG00000019128	324244	zgc:63734	NA	NA	NA	zgc:63734	ZDB-GENE-030131-2964	tpm4b	2	1	1	1	2	2	21112	2	55567558	55584168
MAD_Dr_004_168088	NM_001114314.1 ; Dr.22122	0	1		0	1	5108	NM_001114314.1	NM_001114314	zgc:174263	ENSDARG00000059069	569949	zgc:174263	Dr.22122	zgc:174263	zgc:174263	zgc:174263	ZDB-GENE-030131-4589	zgc:174263	2	1	1	1	2	2	21112	NA	NA	NA
MAD_Dr_004_184827	ENSDART00000006099	3	1	OTTDART00000039636 ; NM_001020670.1 ; Dr.10610	0	1	77502	NA	NA	NA	ENSDARG00000014976	553696	NA	NA	NA	NA	zgc:112257	ZDB-GENE-050522-56	lims2	2	1	1	1	2	2	21112	9	116315	122190
MAD_Dr_004_187303	OTTDART00000024125	1	0	Dr.143270	0	1	81109	NA	NA	NA	ENSDARG00000002330	378959	NA	NA	NA	NA	NA	ZDB-GENE-031008-2	lhx8a	2	1	1	1	2	2	21112	2	11422196	11426569
MAD_Dr_004_164960	ENSDART00000011583	0	-	-	0	1	46499	NA	NA	NA	ENSDARG00000016139	393134	NA	NA	NA	NA	McKusick-Kaufman syndrome	ZDB-GENE-040426-757	mkks	2	1	1	1	2	2	21112	13	35346971	35356011
MAD_Dr_004_165613	NM_131557.1	6	0	ENSDART00000051999 ; OTTDART00000023360 ; OTTDART00000023359 ; ENSDART00000051998 ; OTTDART00000023358 ; Dr.78356	0	1	47520	NM_131557.1	NM_131557	gata6	ENSDARG00000035831	58076	GATA-binding protein 6	NA	NA	NA	GATA-binding protein 6	ZDB-GENE-000622-1	gata6	2	1	1	1	2	2	21112	NA	NA	NA
MAD_Dr_004_186917	OTTDART00000042573	0	-	-	0	1	80604	NA	NA	NA	ENSDARG00000088398	559365	NA	NA	NA	NA	NA	ZDB-GENE-090313-269	tmem107l	2	1	1	1	2	2	21112	23	28556239	28560612
MAD_Dr_004_141989	ENSDART00000039925 ; ENSDART00000106590	2	1	XM_696607.2 ; NM_001013547.1	0	1	141475	NA	NA	NA	ENSDARG00000034025	541420	NA	NA	NA	NA	hypothetical LOC555155; zgc:113295	ZDB-GENE-050320-122	zgc:113295	2	1	1	1	2	2	21112	NA	NA	NA
MAD_Dr_004_161987	ENSDART00000030211	2	0	OTTDART00000026288 ; NM_213110.1	0	1	42324	NA	NA	NA	ENSDARG00000028327	406384	NA	NA	NA	NA	glia maturation factor, beta	ZDB-GENE-040426-2114	gmfb	2	1	1	1	1	2	21111	13	36459567	36467786
MAD_Dr_004_107879	ENSDART00000067586	3	0	NM_001007394.1 ; Dr.153821 ; Dr.86283	0	1	108028	NA	NA	NA	ENSDARG00000045978	492522	NA	NA	NA	NA	zgc:103414	ZDB-GENE-041114-95	chchd6b	2	1	1	1	1	2	21111	6	1542217	1562292
MAD_Dr_004_194981	OTTDART00000026286	0	-	-	0	1	95177	NA	NA	NA	ENSDARG00000039130	402796	NA	NA	NA	NA	cyclin-dependent kinase inhibitor 3	ZDB-GENE-060427-2	cdkn3	2	1	1	1	1	2	21111	13	36487098	36496094
MAD_Dr_004_128648	NM_200845.1	2	1	OTTDART00000028782 ; Dr.76089	0	1	128601	NM_200845.1	NM_200845	zgc:77702	ENSDARG00000035756	393818	zgc:77702	NA	NA	NA	zgc:77702; zgc:114188	ZDB-GENE-040426-1852	rps17	2	1	1	1	1	2	21111	NA	NA	NA
MAD_Dr_004_117373	Dr.120436	4	0	OTTDART00000042469 ; OTTDART00000042395 ; ENSDART00000115004 ; ENSDART00000086491	0	2	117966	NA	NA	NA	ENSDARG00000074811	568173	NA	Dr.120436	NA	NA	similar to suppressor of IKK epsilon	ZDB-GENE-090313-312	si:dkey-3p8.4	2	1	1	1	1	2	21111	NA	NA	NA
MAD_Dr_004_118833	ENSDART00000112810	18	0	XM_001922728.1 ; XR_045033.1 ; XR_045233.1 ; Dr.125324 ; NM_001109855.1 ; Dr.117846 ; XM_689267.3 ; Dr.152733 ; XM_001923918.1 ; XM_001923282.1 ; Dr.123002 ; XM_001922914.1 ; NM_001114454.1 ; XM_001923102.1 ; XM_001921408.1 ; Dr.92652 ; XM_001337882.2 ; ENSDART00000111987	0	1	119280	NA	NA	NA	ENSDARG00000088382	-	NA	NA	NA	NA	NA	NA	NA	2	1	1	1	1	2	21111	NA	NA	NA
MAD_Dr_004_161618	NM_001017591.1	1	0	ENSDART00000014685	0	1	41772	NM_001017591.1	NM_001017591	zgc:110307	ENSDARG00000011769	550253	zgc:110307	NA	NA	NA	zgc:110307	ZDB-GENE-041210-191	cpm	2	1	1	1	1	2	21111	4	24019680	24038238
MAD_Dr_004_503279	NM_001099252.1	4	0	gi|503279 ; gi|197670 ; gi|173317 ; gi|122273	1	1	-2	NM_001099252.1	NM_001099252	tex2	ENSDARG00000078186	798401	testis expressed 2	NA	NA	NA	zgc:162874; similar to Testis-expressed sequence 2 protein	ZDB-GENE-070615-7	tex2	2	1	1	1	1	2	21111	3	55228650	55278160
MAD_Dr_004_162913	OTTDART00000034856	0	-	-	0	1	43659	NA	NA	NA	ENSDARG00000073738	-	NA	NA	NA	NA	NA	NA	NA	2	1	1	1	1	2	21111	8	10981346	11039525
MAD_Dr_004_137347	OTTDART00000021046	1	0	Dr.111200	0	1	136849	NA	NA	NA	ENSDARG00000095530	8388607	NA	NA	NA	NA	NA	ZDB-GENE-070912-717	si:rp71-78h1.1	2	1	1	1	1	2	21111	9	1866589	1882612
MAD_Dr_004_144279	ENSDART00000040171	2	0	Dr.79287 ; NM_001025462.1	0	1	16804	NA	NA	NA	ENSDARG00000019797	336260	NA	NA	NA	NA	zgc:110077	ZDB-GENE-030131-8204	qrich1	2	1	1	1	1	2	21111	11	17862768	17885623
MAD_Dr_004_145927	OTTDART00000011491	0	-	-	0	1	18919	NA	NA	NA	ENSDARG00000042900	402863	NA	NA	NA	NA	NA	ZDB-GENE-041007-2	gtpbp1l	2	1	1	1	1	2	21111	22	14811716	14827120
MAD_Dr_004_151652	OTTDART00000042790	0	-	-	0	1	26672	NA	NA	NA	ENSDARG00000053869	8388607	NA	NA	NA	NA	NA	ZDB-GENE-080104-7	ankrd55	2	1	1	1	1	2	21111	NA	NA	NA
MAD_Dr_004_151883	ENSDART00000009545	2	0	Dr.132625 ; NM_001002222.1	0	1	2697	NA	NA	NA	ENSDARG00000018110	431769	NA	NA	NA	NA	zgc:92014	ZDB-GENE-040704-69	pak4	2	1	1	1	1	2	21111	15	25516827	25550745
MAD_Dr_004_153262	ENSDART00000062685	3	0	NM_001044759.1 ; OTTDART00000017376 ; Dr.82215	0	1	28983	NA	NA	NA	ENSDARG00000042714	403147	NA	NA	NA	NA	toll-like receptor adaptor molecule 1	ZDB-GENE-040219-2	ticam1	2	1	1	1	1	2	21111	NA	NA	NA
MAD_Dr_004_153941	NM_201139.1 ; Dr.12808	2	0	OTTDART00000024132 ; ENSDART00000022621	0	1	30310	NM_201139.1	NM_201139	kdsr	ENSDARG00000012021	394114	3-ketodihydrosphingosine reductase	Dr.12808	kdsr	3-ketodihydrosphingosine reductase	3-ketodihydrosphingosine reductase; similar to 3-ketodihydrosphingosine reductase	ZDB-GENE-040426-853	kdsr	2	1	1	1	1	2	21111	2	13540969	13572035
MAD_Dr_004_155906	ENSDART00000111362	2	0	Dr.82635 ; NM_200940.1	0	1	33792	NA	NA	NA	ENSDARG00000077180	393914	NA	NA	NA	NA	zgc:55871	ZDB-GENE-040426-827	slc37a4b	2	1	1	1	1	2	21111	10	39192826	39272701
MAD_Dr_004_156399	OTTDART00000037872	1	1	OTTDART00000037873	0	1	34471	NA	NA	NA	ENSDARG00000059811	567592	NA	NA	NA	NA	NA	ZDB-GENE-061110-22	smpd5	2	1	1	1	1	2	21111	16	53632221	53655415
MAD_Dr_004_157928	OTTDART00000027647	0	-	-	0	1	36632	NA	NA	NA	ENSDARG00000030478	327557	NA	NA	NA	NA	NA	ZDB-GENE-030131-5768	zgc:66484	2	1	1	1	1	2	21111	9	45097565	45104932
MAD_Dr_004_159569	ENSDART00000012222	0	-	-	0	1	39010	NA	NA	NA	ENSDARG00000009484	114428	NA	NA	NA	NA	ADP-ribosylation factor 1	ZDB-GENE-010724-5	arf1	2	1	1	1	1	2	21111	2	3220758	3235048
MAD_Dr_004_166215	ENSDART00000089642	0	-	-	0	1	48378	NA	NA	NA	ENSDARG00000062195	-	NA	NA	NA	NA	NA	ZDB-GENE-070628-4	fbxo31	2	1	1	1	1	2	21111	25	21763198	21796769
MAD_Dr_004_171467	Dr.126015	2	0	NM_001002412.1 ; ENSDART00000013093	0	1	56298	NA	NA	NA	ENSDARG00000003642	436685	NA	Dr.126015	zgc:92683	zgc:92683	zgc:92683	ZDB-GENE-040718-109	zfyve19	2	1	1	1	1	2	21111	17	1933700	1949875
MAD_Dr_004_171721	ENSDART00000028883	0	-	-	0	1	56705	NA	NA	NA	ENSDARG00000037924	336333	NA	NA	NA	NA	guanine nucleotide binding protein (G protein), al	ZDB-GENE-030131-8277	gna13b	2	1	1	1	1	2	21111	3	36202981	36235305
MAD_Dr_004_176539	ENSDART00000060853	1	1	OTTDART00000039583	0	1	63940	NA	NA	NA	ENSDARG00000041511	449821	NA	NA	NA	NA	peroxisome biogenesis factor 10	ZDB-GENE-041010-71	pex10	2	1	1	1	1	2	21111	8	47329338	47339289
MAD_Dr_004_177102	ENSDART00000087219	2	1	Dr.107908 ; XM_685001.3	0	1	64788	NA	NA	NA	ENSDARG00000061272	564564	NA	NA	NA	NA	NA	NA	NA	2	1	1	1	1	2	21111	23	34928263	34970891
MAD_Dr_004_177351	XM_689276.3	1	0	XM_001923923.1	0	1	65162	XM_689276.3	XM_689276	NA	ENSDARG00000089951	-	NA	NA	NA	NA	NA	NA	NA	2	1	1	1	1	2	21111	3	52421914	52428578
MAD_Dr_004_177632	ENSDART00000013480	1	1	OTTDART00000027355	0	1	65636	NA	NA	NA	ENSDARG00000002412	449816	NA	NA	NA	NA	elongation of very long chain fatty acids (FEN1/El	ZDB-GENE-041010-66	elovl1a	2	1	1	1	1	2	21111	NA	NA	NA
MAD_Dr_004_177683	OTTDART00000024216	0	-	-	0	1	65734	NA	NA	NA	ENSDARG00000034174	431721	NA	NA	NA	NA	NA	ZDB-GENE-040704-12	mrrf	2	1	1	1	1	2	21111	10	9471491	9512801
MAD_Dr_004_185711	ENSDART00000106620	0	-	-	0	1	78856	NA	NA	NA	ENSDARG00000076222	-	NA	NA	NA	NA	zgc:174224	ZDB-GENE-071004-118	zgc:174224	2	1	1	1	1	2	21111	22	2681616	2854042
MAD_Dr_004_118138	Dr.52054	0	-	-	0	2	118696	NA	NA	NA	ENSDARG00000061211	751741	NA	Dr.52054	NA	NA	hypothetical LOC791952; zgc:153766	ZDB-GENE-060825-146	spg20b	2	1	1	1	1	2	21111	NA	NA	NA
MAD_Dr_004_177597	Dr.110736 ; NM_001098266.1 ; ENSDART00000104912	0	1		0	1	65577	NM_001098266.1	NM_001098266	si:dkey-222p3.1	ENSDARG00000071103	100007529	si:dkey-222p3.1	Dr.110736	si:dkey-222p3.1	si:dkey-222p3.1	si:dkey-222p3.1	ZDB-GENE-050208-374	si:dkey-222p3.1	2	1	1	1	1	2	21111	22	28257847	28276827
MAD_Dr_004_501297	ENSDART00000045015	3	0	gi|501297 ; gi|155027 ; gi|155018	1	1	-2	NA	NA	NA	ENSDARG00000034480	492811	NA	NA	NA	NA	zgc:101614; similar to guanine nucleotide-binding protein, beta-4 subunit	ZDB-GENE-041114-167	gnb4b	2	1	1	1	1	2	21111	NA	NA	NA
MAD_Dr_004_141337	ENSDART00000082122 ; ENSDART00000111348	1	1	OTTDART00000008066	0	1	140867	NA	NA	NA	ENSDARG00000059107	406376	NA	NA	NA	NA	zgc:76871	ZDB-GENE-040426-2096	rtcb	2	1	1	1	1	2	21111	NA	NA	NA
MAD_Dr_004_171456	OTTDART00000029600	2	1	ENSDART00000008795 ; NM_200810.1	0	1	56276	NA	NA	NA	ENSDARG00000017710	393783	NA	NA	NA	NA	zgc:73377	ZDB-GENE-040426-1783	ppp1r14ab	2	1	1	1	1	2	21111	15	20268896	20297373
MAD_Dr_004_124096	ENSDART00000110894 ; NM_001130602.1	0	1		0	1	124611	NM_001130602.1	NM_001130602	zgc:194876	ENSDARG00000076291	563476	zgc:194876	NA	NA	NA	zgc:194876	ZDB-GENE-030131-6602	cox7b	2	1	1	1	1	2	21111	NA	NA	NA
MAD_Dr_004_185176	OTTDART00000008603	0	-	-	0	1	78064	NA	NA	NA	ENSDARG00000045846	550447	NA	NA	NA	NA	NA	ZDB-GENE-030131-7880	osgep	2	1	1	1	1	2	21111	4	5319062	5325401
MAD_Dr_004_167294	XM_001344036.2	0	-	-	0	1	49943	XM_001344036.2	XM_001344036	NA	ENSDARG00000077401	100004883	NA	NA	NA	NA	hypothetical LOC100004883	NA	NA	1	4	5	2	3	5	14523	NA	NA	NA
MAD_Dr_004_141547	OTTDART00000028261	1	1	ENSDART00000064881	0	1	141060	NA	NA	NA	ENSDARG00000077044	450076	NA	NA	NA	NA	ADP-ribosylation factor-like 6 interacting protein 5	ZDB-GENE-031113-22	arl6ip5a	1	4	3	1	2	4	14312	6	43236677	43244095
MAD_Dr_004_502294	ENSDART00000104185	8	1	gi|502294 ; gi|152361 ; gi|152136 ; gi|152007 ; gi|151580 ; gi|148909 ; gi|148899 ; gi|148643	1	1	-2	NA	NA	NA	ENSDARG00000070757	-	NA	NA	NA	NA	NA	ZDB-GENE-040724-246	si:ch211-155i14.1	1	4	2	3	2	4	14232	20	10736052	10743231
MAD_Dr_004_164038	ENSDART00000105114	8	0	ENSDART00000105112 ; OTTDART00000023391 ; OTTDART00000023393 ; OTTDART00000023388 ; OTTDART00000023389 ; NM_001020475.1 ; Dr.146601 ; NM_001114701.1	0	1	45137	NA	NA	NA	ENSDARG00000028850	-	NA	NA	NA	NA	bloodthirsty-related gene family, member 26	ZDB-GENE-060929-1066	btr16	1	3	4	2	1	4	13421	15	18262856	18273701
MAD_Dr_004_161689	ENSDART00000049448 ; ENSDART00000098899	2	0	Dr.80028 ; NM_001076638.1	0	1	41873	NA	NA	NA	ENSDARG00000030004	767700	NA	NA	NA	NA	zgc:153032	ZDB-GENE-060929-744	ero1lb	1	3	4	1	2	4	13412	NA	NA	NA
MAD_Dr_004_165548	ENSDART00000021168	2	1	Dr.348 ; NM_131217.2	0	1	47420	NA	NA	NA	ENSDARG00000005593	30464	NA	NA	NA	NA	retinoid x receptor, gamma a	ZDB-GENE-980526-36	rxrga	1	3	3	3	2	3	13332	2	21067741	21118869
MAD_Dr_004_199296	OTTDART00000001892	0	-	-	0	1	99629	NA	NA	NA	ENSDARG00000031885	64279	NA	NA	NA	NA	proteasome (prosome, macropain) subunit, beta type, 11	ZDB-GENE-001208-1	psmb11	1	3	3	2	3	3	13323	19	7196298	7200531
MAD_Dr_004_148777	OTTDART00000034832	0	-	-	0	1	22842	NA	NA	NA	ENSDARG00000032072	559750	NA	NA	NA	NA	NA	ZDB-GENE-030131-2939	cdk16	1	3	3	2	2	3	13322	8	8323856	8408083
MAD_Dr_004_128127	OTTDART00000023262	4	0	Dr.33836 ; OTTDART00000023270 ; OTTDART00000023266 ; Dr.114981	0	1	128110	NA	NA	NA	ENSDARG00000095363	794063	NA	NA	NA	NA	NA	ZDB-GENE-060526-189	si:dkey-111e8.2	1	3	3	2	1	3	13321	5	37409471	37414054
MAD_Dr_004_151180	OTTDART00000040019	0	-	-	0	1	26063	NA	NA	NA	ENSDARG00000076063	-	NA	NA	NA	NA	NA	ZDB-GENE-081104-254	tprn	1	3	3	2	1	3	13321	NA	NA	NA
MAD_Dr_004_502193	ENSDART00000101576	3	1	gi|502193 ; gi|187256 ; gi|187255	1	1	-2	NA	NA	NA	ENSDARG00000069674	100124614	NA	NA	NA	NA	zgc:162251	ZDB-GENE-070820-4	tmem230b	1	3	3	2	1	3	13321	8	4907123	4916649
MAD_Dr_004_185086	OTTDART00000043341	2	0	Dr.10477 ; NM_199568.1	0	1	77942	NA	NA	NA	ENSDARG00000007708	321769	NA	NA	NA	NA	zgc:56334	ZDB-GENE-030131-488	nsa2	1	3	3	1	2	3	13312	21	3638418	3645040
MAD_Dr_004_155435	XM_689484.3 ; Dr.81990	0	1		0	1	3304	XM_689484.3	XM_689484	NA	ENSDARG00000076180	554108	NA	Dr.81990	zgc:112307	zgc:112307	zgc:112307	NA	NA	1	3	2	4	4	4	13244	NA	NA	NA
MAD_Dr_004_148643	NM_001083817.1 ; OTTDART00000029967 ; NM_001128575.1 ; OTTDART00000008010	0	1		0	1	22675	NM_001083817.1	NM_001083817	NA	ENSDARG00000068915	8388607	NA	NA	NA	NA	NA	ZDB-GENE-041014-76	si:ch211-182e10.4	1	3	2	3	2	3	13232	5	9727548	9734441
MAD_Dr_004_171930	NM_200738.1 ; Dr.107659	2	0	OTTDART00000027085 ; ENSDART00000031245	0	1	57080	NM_200738.1	NM_200738	abi1a	ENSDARG00000010155	393711	abl-interactor 1a	Dr.107659	abi1a	abl-interactor 1a	abl-interactor 1	ZDB-GENE-040426-1701	abi1a	1	3	2	3	1	3	13231	24	5906096	5983457
MAD_Dr_004_187332	OTTDART00000034490	0	-	-	0	1	81148	NA	NA	NA	ENSDARG00000040490	792815	NA	NA	NA	NA	NA	ZDB-GENE-081104-382	dusp19a	1	3	2	3	1	3	13231	9	44912081	44917676
MAD_Dr_004_104442	NM_001089413.1	3	1	Dr.117597 ; OTTDART00000037671 ; OTTDART00000037672	0	1	104570	NM_001089413.1	NM_001089413	zgc:163030	ENSDARG00000069192	566959	zgc:163030	NA	NA	NA	zgc:163030	ZDB-GENE-060810-77	zgc:163030	1	3	2	2	1	3	13221	13	33560391	33562149
MAD_Dr_004_116863	OTTDART00000029829	2	1	ENSDART00000097494 ; OTTDART00000029828	0	1	117383	NA	NA	NA	ENSDARG00000067690	798688	NA	NA	NA	NA	histidine triad nucleotide binding protein 2	ZDB-GENE-070410-139	hint2	1	3	2	2	1	3	13221	NA	NA	NA
MAD_Dr_004_130679	OTTDART00000027879	5	0	OTTDART00000027878 ; ENSDART00000029553 ; OTTDART00000027877 ; Dr.84113 ; NM_001004649.1	0	1	130440	NA	NA	NA	ENSDARG00000028442	447911	NA	NA	NA	NA	zgc:101035	ZDB-GENE-040912-80	rsg1	1	3	2	1	2	3	13212	6	41449005	41454308
MAD_Dr_004_166074	OTTDART00000028620	0	-	-	0	1	48178	NA	NA	NA	ENSDARG00000054199	327496	NA	NA	NA	NA	NA	ZDB-GENE-030131-5707	mthfd2l	1	3	2	1	2	3	13212	8	32380598	32395834
MAD_Dr_004_172462	ENSDART00000112403	0	-	-	0	1	57840	NA	NA	NA	ENSDARG00000077638	100124597	NA	NA	NA	NA	zgc:171965	ZDB-GENE-070820-20	zgc:171965	1	3	2	1	2	3	13212	21	7367584	7390775
MAD_Dr_004_175718	ENSDART00000083449	2	1	Dr.80847 ; NM_001045422.1	0	1	62718	NA	NA	NA	ENSDARG00000059774	566846	NA	NA	NA	NA	duboraya	ZDB-GENE-060825-81	dub	1	3	2	1	2	3	13212	21	22881387	22915016
MAD_Dr_004_106698	OTTDART00000024086	2	1	ENSDART00000050603 ; OTTDART00000024085	0	1	106908	NA	NA	NA	ENSDARG00000030765	445121	NA	NA	NA	NA	NA	ZDB-GENE-040801-261	hadh	1	3	2	1	1	3	13211	1	49265846	49275216
MAD_Dr_004_107140	OTTDART00000033925	2	0	XM_700803.2 ; Dr.91597	0	1	107326	NA	NA	NA	ENSDARG00000093739	-	NA	NA	NA	NA	NA	NA	NA	1	3	2	1	1	3	13211	9	32259211	32260684
MAD_Dr_004_116516	ENSDART00000113297	3	0	ENSDART00000066715 ; OTTDART00000026993 ; Dr.143491	0	1	117046	NA	NA	NA	ENSDARG00000045367	-	NA	NA	NA	NA	tubulin, alpha 1	ZDB-GENE-030822-1	tuba1b	1	3	2	1	1	3	13211	23	35614754	35617716
MAD_Dr_004_182510	OTTDART00000024981	0	-	-	0	1	73916	NA	NA	NA	ENSDARG00000055797	568776	NA	NA	NA	NA	NA	ZDB-GENE-060315-5	cnpy4	1	3	2	1	1	3	13211	7	20207703	20212500
MAD_Dr_004_123738	ENSDART00000061007	3	1	Dr.121290 ; NM_001131053.2 ; OTTDART00000015431	0	1	124245	NA	NA	NA	ENSDARG00000041623	30282	NA	NA	NA	NA	metallothionein 2; metallothionein; kinesin family member 20A	ZDB-GENE-030131-4174	mt2	1	3	2	1	1	3	13211	18	17545561	17546913
MAD_Dr_004_121285	Dr.118705	0	-	-	0	1	121700	NA	NA	NA	ENSDARG00000087131	100332149	NA	Dr.118705	crfb14	cytokine receptor family member B14	cytokine receptor family member B14	ZDB-GENE-071120-5	ifnlr1	1	3	2	1	1	3	13211	16	52459099	52487623
MAD_Dr_004_145449	OTTDART00000027158	1	0	NM_131772.2	0	1	18306	NA	NA	NA	ENSDARG00000030723	81592	NA	NA	NA	NA	claudin 11	ZDB-GENE-010328-13	cldn11b	1	3	2	1	1	3	13211	24	26287500	26296277
MAD_Dr_004_146693	OTTDART00000036883	1	1	ENSDART00000079945	0	1	19893	NA	NA	NA	ENSDARG00000057321	564388	NA	NA	NA	NA	NA	ZDB-GENE-050706-68	tut1	1	3	2	1	1	3	13211	12	10299831	10314158
MAD_Dr_004_155522	ENSDART00000077948	1	1	OTTDART00000036949	0	1	33254	NA	NA	NA	ENSDARG00000055569	497449	NA	NA	NA	NA	GH3 domain containing like	ZDB-GENE-050208-165	ghdc	1	3	2	1	1	3	13211	12	13489119	13511235
MAD_Dr_004_152271	NM_200538.1 ; Dr.28449	2	0	ENSDART00000053531 ; OTTDART00000027012	0	1	27538	NM_200538.1	NM_200538	slc2a12	ENSDARG00000036865	393510	solute carrier family 2 (facilitated glucose trans	Dr.28449	slc2a12	solute carrier family 2 (facilitated glucose trans	solute carrier family 2 (facilitated glucose transporter), member 12	ZDB-GENE-040426-1513	slc2a12	1	3	2	1	1	3	13211	23	31681722	31707085
MAD_Dr_004_166763	NM_001111163.1	0	-	-	0	1	49177	NM_001111163.1	NM_001111163	slc2a10	ENSDARG00000090820	560546	solute carrier family 2 (facilitated glucose trans	NA	NA	NA	solute carrier family 2 (facilitated glucose trans	ZDB-GENE-080204-6	slc2a10	1	3	2	1	1	3	13211	11	2344819	2355462
MAD_Dr_004_170493	ENSDART00000114616 ; ENSDART00000065671	1	1	OTTDART00000026511	0	1	54798	NA	NA	NA	ENSDARG00000044692	553641	NA	NA	NA	NA	exoribonuclease 1	ZDB-GENE-050522-39	eri1	1	3	2	1	1	3	13211	21	19871123	19879385
MAD_Dr_004_172278	ENSDART00000051804	2	1	Dr.10261 ; NM_213223.1	0	1	57569	NA	NA	NA	ENSDARG00000035715	406504	NA	NA	NA	NA	zgc:85717	ZDB-GENE-040426-2315	marcksl1b	1	3	2	1	1	3	13211	19	30210751	30213499
MAD_Dr_004_175649	ENSDART00000043908	1	1	XM_001920000.1	0	1	62615	NA	NA	NA	ENSDARG00000011571	567131	NA	NA	NA	NA	NA	ZDB-GENE-080924-1	calcrlb	1	3	2	1	1	3	13211	6	11445584	11469253
MAD_Dr_004_182716	OTTDART00000023786 ; NM_001145359.1 ; Dr.76964	0	1		0	1	74179	NM_001145359.1	NM_001145359	si:ch211-217k17.7	ENSDARG00000059908	559409	si:ch211-217k17.7	Dr.76964	si:ch211-217k17.7	si:ch211-217k17.7	si:ch211-217k17.7	ZDB-GENE-061009-11	si:ch211-217k17.7	1	3	2	1	1	3	13211	1	51817272	51826584
MAD_Dr_004_183693	NM_001045039.2 ; Dr.73909	1	1	ENSDART00000078858	0	1	75794	NM_001045039.2	NM_001045039	si:ch211-154o6.6	ENSDARG00000056379	564061	si:ch211-154o6.6	Dr.73909	si:ch211-154o6.6	si:ch211-154o6.6	si:ch211-154o6.6	ZDB-GENE-060503-576	si:ch211-154o6.6	1	3	2	1	1	3	13211	16	21975668	21981009
MAD_Dr_004_184585	OTTDART00000042264	1	0	OTTDART00000023649	0	1	77083	NA	NA	NA	ENSDARG00000092166	-	NA	NA	NA	NA	NA	ZDB-GENE-061009-32	si:dkey-147f3.8	1	3	2	1	1	3	13211	23	16962809	16991848
MAD_Dr_004_187481	ENSDART00000029353	1	0	Dr.118650	0	1	81376	NA	NA	NA	ENSDARG00000025784	550378	NA	NA	NA	NA	zgc:112009; similar to RAB39B, member RAS oncogene family	ZDB-GENE-050417-172	rab42b	1	3	2	1	1	3	13211	NA	NA	NA
MAD_Dr_004_156251	ENSDART00000008906	1	1	OTTDART00000037458	0	1	34259	NA	NA	NA	ENSDARG00000018492	324913	NA	NA	NA	NA	zinc finger protein 503	ZDB-GENE-031113-5	znf503	1	3	1	3	2	3	13132	13	17337169	17340052
MAD_Dr_004_100886	NM_178287.5	2	1	Dr.10201 ; ENSDART00000050884	0	1	100980	NM_178287.5	NM_178287	sepw1	ENSDARG00000035136	352915	selenoprotein W, 1	NA	NA	NA	selenoprotein W, 1	ZDB-GENE-030410-5	sepw1	1	3	1	2	1	3	13121	5	61335866	61342425
MAD_Dr_004_102714	ENSDART00000108895	3	1	Dr.120908 ; Dr.126607 ; NM_001025176.3	0	1	102855	NA	NA	NA	ENSDARG00000077587	100334933	NA	NA	NA	NA	NA	NA	NA	1	3	1	2	1	3	13121	25	34645565	34645975
MAD_Dr_004_192194	OTTDART00000019471	0	-	-	0	1	9165	NA	NA	NA	ENSDARG00000035556	338219	NA	NA	NA	NA	NA	ZDB-GENE-030219-119	rps6ka3a	1	3	1	2	1	3	13121	5	23505868	23525437
MAD_Dr_004_154420	OTTDART00000034915 ; ENSDART00000114890	1	1	XR_044815.1	0	1	30954	NA	NA	NA	ENSDARG00000079745	8388607	NA	NA	NA	NA	si:ch211-166a6.5	ZDB-GENE-030131-9913	si:ch211-166a6.5	1	3	1	2	1	3	13121	8	4389210	4451542
MAD_Dr_004_162754	NM_001045295.2	3	0	ENSDART00000033738 ; OTTDART00000024164 ; Dr.80095	0	1	43444	NM_001045295.2	NM_001045295	farsa	ENSDARG00000032750	692329	phenylalanyl-tRNA synthetase, alpha subunit	NA	NA	NA	phenylalanyl-tRNA synthetase, alpha subunit	ZDB-GENE-050512-2	farsa	1	3	1	2	1	3	13121	NA	NA	NA
MAD_Dr_004_176415	ENSDART00000105403	4	0	ENSDART00000025549 ; OTTDART00000029411 ; Dr.84875 ; NM_001002623.1	0	1	63760	NA	NA	NA	ENSDARG00000020659	100330001	NA	NA	NA	NA	NA	NA	NA	1	3	1	1	2	3	13112	NA	NA	NA
MAD_Dr_004_179902	NM_001013549.1	0	-	-	0	1	69164	NM_001013549.1	NM_001013549	zgc:113294	ENSDARG00000032285	541422	zgc:113294	NA	NA	NA	zgc:113294	ZDB-GENE-050320-124	zgc:113294	1	3	1	1	2	3	13112	15	855753	861668
MAD_Dr_004_193586	Dr.78306	0	-	-	0	1	93591	NA	NA	NA	ENSDARG00000074093	559664	NA	Dr.78306	NA	NA	similar to patatin-like phospholipase domain containing 8	NA	NA	1	3	1	1	2	3	13112	NA	NA	NA
MAD_Dr_004_181607	ENSDART00000059041	2	0	Dr.75735 ; NM_183071.2	0	1	72338	NA	NA	NA	ENSDARG00000040344	327403	NA	NA	NA	NA	linker histone H1M	ZDB-GENE-030131-5614	h1m	1	2	4	3	1	4	12431	NA	NA	NA
MAD_Dr_004_144037	OTTDART00000009549	0	-	-	0	1	16504	NA	NA	NA	ENSDARG00000063050	559834	NA	NA	NA	NA	NA	ZDB-GENE-060503-694	rc3h2	1	2	3	4	2	4	12342	10	9764618	9816166
MAD_Dr_004_150394	NM_001007183.2 ; Dr.77617	2	0	ENSDART00000088026 ; ENSDART00000076531	0	1	24996	NM_001007183.2	NM_001007183	prmt5	ENSDARG00000079605	368664	protein arginine methyltransferase 5	Dr.77617	prmt5	protein arginine methyltransferase 5	protein arginine methyltransferase 5	ZDB-GENE-030616-585	prmt5	1	2	3	3	1	3	12331	2	38359959	38380689
MAD_Dr_004_156819	NM_001145700.1	0	-	-	0	1	35086	NM_001145700.1	NM_001145700	atl1	ENSDARG00000060481	571909	atlastin GTPase 1	NA	NA	NA	atlastin GTPase 1	ZDB-GENE-030131-8003	atl1	1	2	3	3	1	3	12331	13	36638817	36658568
MAD_Dr_004_169689	NM_001017540.1 ; Dr.43065 ; OTTDART00000022929 ; ENSDART00000029364	0	1		0	1	53442	NM_001017540.1	NM_001017540	ak5l	ENSDARG00000017739	548336	adenylate kinase 5, like	Dr.43065	ak5l	adenylate kinase 5, like	adenylate kinase 5, like	ZDB-GENE-050410-2	ak5l	1	2	3	3	1	3	12331	5	63496285	63521902
MAD_Dr_004_183569	ENSDART00000077087	3	1	OTTDART00000025475 ; NM_152967.1 ; Dr.7103	0	1	75602	NA	NA	NA	ENSDARG00000054823	246093	NA	NA	NA	NA	inhibitor of DNA binding 3	ZDB-GENE-020515-1	id3	1	2	3	3	1	3	12331	17	27253008	27254905
MAD_Dr_004_181179	ENSDART00000081746	0	-	-	0	1	71514	NA	NA	NA	ENSDARG00000058806	436891	NA	NA	NA	NA	apolipoprotein A-I binding protein	ZDB-GENE-040718-362	apoa1bp	1	2	3	2	3	3	12323	19	7489310	7493722
MAD_Dr_004_158780	Dr.84666	4	0	ENSDART00000113643 ; ENSDART00000110768 ; ENSDART00000006596 ; OTTDART00000028109	0	1	37914	NA	NA	NA	ENSDARG00000075172	403037	NA	Dr.84666	fbxo25	F-box protein 25	F-box protein 25	ZDB-GENE-040801-19	fbxo25	1	2	3	2	2	3	12322	23	35369920	35384286
MAD_Dr_004_173194	NM_001003622.1	4	0	ENSDART00000106561 ; ENSDART00000058715 ; XM_001918689.1 ; ENSDART00000106562	0	1	58961	NM_001003622.1	NM_001003622	zgc:100951	ENSDARG00000040141	445228	zgc:100951	NA	NA	NA	zgc:113886; similar to zinc finger protein 53; zgc:100951; zgc:173816; hypothetical LOC798798	ZDB-GENE-050913-91	zgc:113886	1	2	3	2	2	3	12322	22	1283689	1290245
MAD_Dr_004_163798	ENSDART00000105309	0	-	-	0	1	44818	NA	NA	NA	ENSDARG00000027491	404731	NA	NA	NA	NA	uroporphyrinogen III synthase	ZDB-GENE-040323-2	uros	1	2	3	2	2	3	12322	12	48750693	48759117
MAD_Dr_004_167721	OTTDART00000026542	1	1	Dr.76996	0	1	50520	NA	NA	NA	ENSDARG00000013930	791772	NA	NA	NA	NA	leukocyte cell derived chemotaxin 1	ZDB-GENE-010713-1	lect1	1	2	3	2	2	3	12322	NA	NA	NA
MAD_Dr_004_502410	ENSDART00000106568	6	0	gi|502410 ; gi|173194 ; gi|166730 ; gi|141413 ; gi|164522 ; gi|141412	1	1	-2	NA	NA	NA	ENSDARG00000077077	100148648	NA	NA	NA	NA	zgc:113886	NA	NA	1	2	3	2	2	3	12322	NA	NA	NA
MAD_Dr_004_147280	OTTDART00000006656	2	1	ENSDART00000101262 ; ENSDART00000020969	0	1	20718	NA	NA	NA	ENSDARG00000004574	563394	NA	NA	NA	NA	NA	ZDB-GENE-041014-349	gtf3c2	1	2	3	2	1	3	12321	20	38640435	38681282
MAD_Dr_004_170603	NM_001089546.1 ; Dr.80674	0	1		0	1	54934	NM_001089546.1	NM_001089546	zgc:163014	ENSDARG00000074100	100038766	zgc:163014	Dr.80674	zgc:163014	zgc:163014	zgc:163014; similar to kelch domain containing 3	ZDB-GENE-070424-100	zgc:163014	1	2	3	2	1	3	12321	17	45000249	45011772
MAD_Dr_004_174834	NM_001033753.1 ; Dr.116460	2	0	ENSDART00000101108 ; OTTDART00000027430	0	1	61340	NM_001033753.1	NM_001033753	zgc:113314	ENSDARG00000069453	619272	zgc:113314	Dr.116460	zgc:113314	zgc:113314	zgc:113314	ZDB-GENE-050913-19	zgc:113314	1	2	3	2	1	3	12321	9	30610743	30616371
MAD_Dr_004_181661	NM_001080668.1 ; Dr.94233	1	0	XM_001343726.2	0	1	7245	NM_001080668.1	NM_001080668	zgc:158258	ENSDARG00000070229	791186	zgc:158258	Dr.94233	zgc:158258	zgc:158258	hypothetical LOC100004461; zgc:158258	ZDB-GENE-070112-2272	zgc:158258	1	2	3	2	1	3	12321	11	37416073	37425814
MAD_Dr_004_163912	Dr.81533	0	-	-	0	1	44987	NA	NA	NA	ENSDARG00000015236	560682	NA	Dr.81533	pycrl	pyrroline-5-carboxylate reductase-like	pyrroline-5-carboxylate reductase-like	ZDB-GENE-041014-244	pycrl	1	2	3	1	2	3	12312	20	52723477	52736867
MAD_Dr_004_180784	ENSDART00000100160	1	1	OTTDART00000015171	0	1	70519	NA	NA	NA	ENSDARG00000069045	555570	NA	NA	NA	NA	si:ch211-218c6.5	ZDB-GENE-050419-148	chtf8	1	2	3	1	2	3	12312	18	17032325	17035812
MAD_Dr_004_102399	OTTDART00000034147	2	1	OTTDART00000001940 ; OTTDART00000026515	0	1	102528	NA	NA	NA	ENSDARG00000034677	368684	NA	NA	NA	NA	sciellin	ZDB-GENE-030616-15	scel	1	2	3	1	1	3	12311	9	17298450	17326946
MAD_Dr_004_152203	Dr.84734	1	1	OTTDART00000029155	0	1	27459	NA	NA	NA	ENSDARG00000044634	664760	NA	Dr.84734	tbce	tubulin folding cofactor E	zgc:123075	ZDB-GENE-051030-120	tbce	1	2	3	1	1	3	12311	NA	NA	NA
MAD_Dr_004_107762	ENSDART00000086733	4	1	Dr.82602 ; XM_001332703.2 ; ENSDART00000086737 ; ENSDART00000086738	0	1	107918	NA	NA	NA	ENSDARG00000074928	-	NA	NA	NA	NA	NA	NA	NA	1	2	3	1	1	3	12311	25	36727100	36732380
MAD_Dr_004_143152	OTTDART00000022241 ; ENSDART00000058100 ; NM_001045210.1 ; Dr.76635	0	1		0	1	15324	NM_001045210.1	NM_001045210	xpc	ENSDARG00000039754	541386	xeroderma pigmentosum, complementation group C	Dr.76635	xpc	xeroderma pigmentosum, complementation group C	xeroderma pigmentosum, complementation group C	ZDB-GENE-030131-8461	xpc	1	2	3	1	1	3	12311	8	25988851	26011811
MAD_Dr_004_146176	OTTDART00000021553	0	-	-	0	1	19219	NA	NA	NA	ENSDARG00000035507	325248	NA	NA	NA	NA	NA	ZDB-GENE-030131-3973	ddx31	1	2	3	1	1	3	12311	5	29114633	29145413
MAD_Dr_004_147059	NM_001004563.1 ; Dr.36513	1	0	ENSDART00000028247	0	1	20391	NM_001004563.1	NM_001004563	gdap2	ENSDARG00000021569	447824	ganglioside induced differentiation associated pro	Dr.36513	gdap2	ganglioside induced differentiation associated pro	ganglioside induced differentiation associated protein 2	ZDB-GENE-040912-31	gdap2	1	2	3	1	1	3	12311	9	20995458	21042615
MAD_Dr_004_149539	ENSDART00000104608	1	1	XM_688663.3	0	1	23837	NA	NA	NA	ENSDARG00000070953	565386	NA	NA	NA	NA	NA	ZDB-GENE-131127-625	si:dkey-59k9.2	1	2	3	1	1	3	12311	17	21458056	21474459
MAD_Dr_004_157308	ENSDART00000104933	0	-	-	0	1	35706	NA	NA	NA	ENSDARG00000071116	402965	NA	NA	NA	NA	zgc:77395	ZDB-GENE-040426-1831	eepd1	1	2	3	1	1	3	12311	19	11352849	11397226
MAD_Dr_004_165098	OTTDART00000028320	2	0	Dr.78290 ; NM_001009987.1	0	1	46742	NA	NA	NA	ENSDARG00000029479	494496	NA	NA	NA	NA	zgc:86609	ZDB-GENE-050102-7	zgc:86609	1	2	3	1	1	3	12311	8	8647545	8660022
MAD_Dr_004_167407	ENSDART00000082526	1	1	OTTDART00000028835	0	1	50091	NA	NA	NA	ENSDARG00000059412	553663	NA	NA	NA	NA	zgc:111976	ZDB-GENE-050522-332	zgc:111976	1	2	3	1	1	3	12311	24	1027795	1040340
MAD_Dr_004_169281	OTTDART00000021952	0	-	-	0	1	52839	NA	NA	NA	ENSDARG00000073814	572108	NA	NA	NA	NA	NA	ZDB-GENE-060503-372	pax1b	1	2	3	1	1	3	12311	20	48863965	48870376
MAD_Dr_004_170047	NM_001100155.1	0	-	-	0	1	54172	NM_001100155.1	NM_001100155	zgc:165508	ENSDARG00000077462	100101652	zgc:165508	NA	NA	NA	zgc:165508	ZDB-GENE-070719-4	zgc:165508	1	2	3	1	1	3	12311	NA	NA	NA
MAD_Dr_004_172870	OTTDART00000034633 ; ENSDART00000092716	0	1		0	1	5850	NA	NA	NA	ENSDARG00000012368	569823	NA	NA	NA	NA	tetratricopeptide repeat domain 21B	ZDB-GENE-031010-34	ttc21b	1	2	3	1	1	3	12311	9	50111092	50163365
MAD_Dr_004_173329	OTTDART00000034079	1	1	XM_001920610.1	0	1	59140	NA	NA	NA	ENSDARG00000069926	553532	NA	NA	NA	NA	NA	ZDB-GENE-081105-30	hsd3b1	1	2	3	1	1	3	12311	9	21383576	21389595
MAD_Dr_004_197232	OTTDART00000017848	10	0	Dr.94994 ; OTTDART00000017841 ; XM_001344176.2 ; Dr.152412 ; XM_001922811.1 ; ENSDART00000110496 ; ENSDART00000111925 ; ENSDART00000109456 ; ENSDART00000115304 ; NM_001170835.1	0	1	97546	NA	NA	NA	ENSDARG00000092498	335411	NA	NA	NA	NA	NA	ZDB-GENE-030131-7351	si:dkeyp-46h3.2	1	2	3	1	1	3	12311	19	28002600	28004619
MAD_Dr_004_503201	NM_001020761.1	2	0	gi|503201 ; gi|107249	1	1	-2	NM_001020761.1	NM_001020761	zgc:112089	ENSDARG00000069850	553799	zgc:112089	NA	NA	NA	zgc:112089	ZDB-GENE-050522-240	mrpl30	1	2	3	1	1	3	12311	9	22013894	22015044
MAD_Dr_004_151450	NM_001113630.1	2	0	XR_044982.1 ; Dr.151128	0	1	26411	NM_001113630.1	NM_001113630	zgc:173544	ENSDARG00000070714	793869	zgc:173544	NA	NA	NA	zgc:173544; hypothetical LOC794329	ZDB-GENE-030131-6229	zgc:173544	1	2	2	3	3	3	12233	11	15883248	15886887
MAD_Dr_004_157321	NM_131856.2 ; ENSDART00000062587	1	1	OTTDART00000014038	0	1	35730	NM_131856.2	NM_131856	klf2a	ENSDARG00000042667	117508	Kruppel-like factor 2a	NA	NA	NA	Kruppel-like factor 2a	ZDB-GENE-011109-1	klf2a	1	2	2	3	2	3	12232	22	15871951	15874649
MAD_Dr_004_189297	NM_001020728.1	1	1	OTTDART00000027457	0	1	87643	NM_001020728.1	NM_001020728	fahd1	ENSDARG00000031657	553762	fumarylacetoacetate hydrolase domain containing 1	NA	NA	NA	fumarylacetoacetate hydrolase domain containing 1	ZDB-GENE-050522-448	fahd1	1	2	2	3	2	3	12232	3	18645830	18646819
MAD_Dr_004_503709	OTTDART00000012429	9	0	gi|503709 ; gi|176923 ; gi|161526 ; gi|161521 ; gi|160861 ; gi|160800 ; gi|160180 ; gi|160176 ; gi|164797	1	1	-2	NA	NA	NA	ENSDARG00000092252	-	NA	NA	NA	NA	NA	ZDB-GENE-060125-3	si:dkey-103k4.1	1	2	2	3	2	3	12232	22	30585874	30596781
MAD_Dr_004_120219	NM_213122.2 ; Dr.76585 ; OTTDART00000017993 ; ENSDART00000026992	0	1		0	1	12065	NM_213122.2	NM_213122	sox4a	ENSDARG00000004588	336346	SRY-box containing gene 4a	Dr.76585	sox4a	SRY-box containing gene 4a	SRY-box containing gene 4a	ZDB-GENE-030131-8290	sox4a	1	2	2	2	2	2	12222	19	29201926	29205186
MAD_Dr_004_133550	OTTDART00000045625	0	-	-	0	1	133150	NA	NA	NA	ENSDARG00000094991	-	NA	NA	NA	NA	NA	ZDB-GENE-091204-473	si:ch73-106o10.1	1	2	2	2	2	2	12222	NA	NA	NA
MAD_Dr_004_141225	ENSDART00000097249	1	0	ENSDART00000024676	0	1	140764	NA	NA	NA	ENSDARG00000028087	368239	NA	NA	NA	NA	NA	ZDB-GENE-030326-5	aldh2.2	1	2	2	2	2	2	12222	5	68824610	68848201
MAD_Dr_004_185765	OTTDART00000040951	2	1	OTTDART00000040950 ; ENSDART00000004062	0	1	78946	NA	NA	NA	ENSDARG00000014313	406599	NA	NA	NA	NA	NA	ZDB-GENE-040426-2534	atp5j	1	2	2	2	2	2	12222	1	614903	619459
MAD_Dr_004_144486	ENSDART00000062727	2	1	OTTDART00000010925 ; Dr.75422	0	1	17071	NA	NA	NA	ENSDARG00000042742	550577	NA	NA	NA	NA	syntaxin 6	ZDB-GENE-030131-858	stx6	1	2	2	2	2	2	12222	22	16457876	16468296
MAD_Dr_004_144826	XM_001340306.2	0	-	-	0	1	17529	XM_001340306.2	XM_001340306	NA	ENSDARG00000088817	-	NA	NA	NA	NA	NA	NA	NA	1	2	2	2	2	2	12222	18	5260288	5296575
MAD_Dr_004_147680	ENSDART00000028603	0	-	-	0	1	21329	NA	NA	NA	ENSDARG00000027512	407672	NA	NA	NA	NA	amiloride-sensitive cation channel 2 a	ZDB-GENE-040513-1	asic1b	1	2	2	2	2	2	12222	NA	NA	NA
MAD_Dr_004_162834	OTTDART00000012822	1	1	XM_001336274.2	0	1	43546	NA	NA	NA	ENSDARG00000011955	-	NA	NA	NA	NA	NA	ZDB-GENE-060503-803	adck4	1	2	2	2	2	2	12222	NA	NA	NA
MAD_Dr_004_166946	NM_001007347.1 ; Dr.84509	2	1	ENSDART00000078124 ; OTTDART00000028496	0	1	49447	NM_001007347.1	NM_001007347	zgc:103481	ENSDARG00000055730	492475	zgc:103481	Dr.84509	zgc:103481	zgc:103481	zgc:103481	ZDB-GENE-041114-35	trim35-29	1	2	2	2	2	2	12222	16	26973053	26975876
MAD_Dr_004_164681	OTTDART00000027627	0	-	-	0	1	46075	NA	NA	NA	ENSDARG00000008396	619192	NA	NA	NA	NA	finTRIM family, member 24	ZDB-GENE-050731-2	ftr24	1	2	2	2	2	2	12222	2	47990797	48069643
MAD_Dr_004_165814	ENSDART00000105934	0	-	-	0	1	47803	NA	NA	NA	ENSDARG00000074820	100034448	NA	NA	NA	NA	si:dkey-253d23.9	ZDB-GENE-050208-648	si:dkey-253d23.9	1	2	2	2	2	2	12222	22	9896082	9904329
MAD_Dr_004_167164	ENSDART00000030643	3	1	OTTDART00000038386 ; Dr.120285 ; NM_212879.1	0	1	49754	NA	NA	NA	ENSDARG00000027658	405815	NA	NA	NA	NA	interferon regulatory factor 10	ZDB-GENE-040426-2084	irf10	1	2	2	2	2	2	12222	23	629208	640540
MAD_Dr_004_174847	OTTDART00000014697	1	1	Dr.148876	0	1	61362	NA	NA	NA	ENSDARG00000074125	559851	NA	NA	NA	NA	si:dkey-4c15.5	ZDB-GENE-050420-11	si:dkey-4c15.5	1	2	2	2	2	2	12222	22	2074051	2218994
MAD_Dr_004_175627	NM_213211.1 ; Dr.106814	1	1	XM_001918885.1	0	1	62585	NM_213211.1	NM_213211	tmem107	ENSDARG00000075971	406492	transmembrane protein 107	Dr.106814	tmem107	transmembrane protein 107	transmembrane protein 107	ZDB-GENE-040426-2294	tmem107	1	2	2	2	2	2	12222	NA	NA	NA
MAD_Dr_004_176361	NM_001013284.1	1	0	XM_001331019.2	0	1	63678	NM_001013284.1	NM_001013284	mif4gdb	ENSDARG00000006331	503596	MIF4G domain containing b	NA	NA	NA	hypothetical LOC791917; MIF4G domain containing b	ZDB-GENE-050227-7	mif4gdb	1	2	2	2	2	2	12222	NA	NA	NA
MAD_Dr_004_178679	ENSDART00000062814	3	1	Dr.43219 ; NM_001017907.1 ; OTTDART00000011597	0	1	67247	NA	NA	NA	ENSDARG00000042799	550606	NA	NA	NA	NA	si:dkey-171o17.2	ZDB-GENE-030219-10	atpaf1	1	2	2	2	2	2	12222	22	17166497	17175590
MAD_Dr_004_178619	NM_001128796.1	0	-	-	0	1	67153	NM_001128796.1	NM_001128796	zgc:194551	ENSDARG00000077903	798206	zgc:194551	NA	NA	NA	zgc:194551	ZDB-GENE-030131-4878	zgc:194551	1	2	2	2	2	2	12222	22	26653862	26664323
MAD_Dr_004_180484	NM_001076730.1 ; Dr.36660	0	1		0	1	70011	NM_001076730.1	NM_001076730	zgc:153610	ENSDARG00000029048	767763	zgc:153610	Dr.36660	zgc:153610	zgc:153610	zgc:153610	ZDB-GENE-060929-132	exoc6b	1	2	2	2	2	2	12222	NA	NA	NA
MAD_Dr_004_186451	NM_001002662.2	2	1	ENSDART00000079448 ; Dr.39062	0	1	79960	NM_001002662.2	NM_001002662	rgs2	ENSDARG00000056875	436935	regulator of G-protein signaling 2	NA	NA	NA	regulator of G-protein signaling 2	ZDB-GENE-040718-410	rgs2	1	2	2	2	2	2	12222	NA	NA	NA
MAD_Dr_004_188206	NM_001008596.1	0	-	-	0	1	82658	NM_001008596.1	NM_001008596	zgc:103612	ENSDARG00000043102	494053	zgc:103612	NA	NA	NA	zgc:103612	ZDB-GENE-041212-18	lxn	1	2	2	2	2	2	12222	15	1220620	1238131
MAD_Dr_004_189329	OTTDART00000022431	0	-	-	0	1	87748	NA	NA	NA	ENSDARG00000054574	407699	NA	NA	NA	NA	NA	ZDB-GENE-050417-272	znhit1	1	2	2	2	2	2	12222	5	38004724	38012463
MAD_Dr_004_501521	ENSDART00000061955	2	0	gi|501521 ; gi|195821	1	1	-2	NA	NA	NA	ENSDARG00000042245	393488	NA	NA	NA	NA	zgc:66286	ZDB-GENE-040426-1593	myl13	1	2	2	2	2	2	12222	2	2628812	2639928
MAD_Dr_004_196209	ENSDART00000089232	3	1	Dr.83539 ; XM_690968.3 ; OTTDART00000044844	0	1	9649	NA	NA	NA	ENSDARG00000062058	567667	NA	NA	NA	NA	NA	ZDB-GENE-030829-61	slc12a7b	1	2	2	2	2	2	12222	24	39890801	39997944
MAD_Dr_004_502317	ENSDART00000104778	4	1	gi|503236 ; gi|502317 ; gi|198417 ; gi|191228	1	1	-2	NA	NA	NA	ENSDARG00000071036	556629	NA	NA	NA	NA	si:dkey-286j15.3	ZDB-GENE-060503-635	si:dkey-286j15.3	1	2	2	2	2	2	12222	22	30041253	30051631
MAD_Dr_004_501796	ENSDART00000079922	5	0	gi|501796 ; gi|198796 ; gi|179586 ; gi|192779 ; gi|100697	1	1	-2	NA	NA	NA	ENSDARG00000057299	-	NA	NA	NA	NA	zgc:92611	NA	NA	1	2	2	2	2	2	12222	10	20145686	20148631
MAD_Dr_004_501874	ENSDART00000083898	4	1	gi|501874 ; gi|164204 ; gi|164198 ; gi|145789	1	1	-2	NA	NA	NA	ENSDARG00000059933	557680	NA	NA	NA	NA	NA	ZDB-GENE-060526-241	ppap2b	1	2	2	2	2	2	12222	20	7977476	8036607
MAD_Dr_004_502192	ENSDART00000101574	3	0	gi|502192 ; gi|163514 ; gi|190708	1	1	-2	NA	NA	NA	ENSDARG00000057223	30223	NA	NA	NA	NA	ephrin A5a	ZDB-GENE-980526-186	efna5b	1	2	2	2	2	2	12222	NA	NA	NA
MAD_Dr_004_121431	XM_688512.3 ; ENSDART00000075430	0	1		0	1	121855	XM_688512.3	XM_688512	NA	ENSDARG00000053387	-	NA	NA	NA	NA	NA	ZDB-GENE-081105-158	si:ch211-276k2.2	1	2	2	2	1	2	12221	22	35455330	35467696
MAD_Dr_004_185663	XM_001336012.1 ; Dr.95819	0	1		0	1	78759	XM_001336012.1	XM_001336012	NA	ENSDARG00000074904	799859	NA	Dr.95819	NA	NA	similar to dystrobrevin binding protein 1	NA	NA	1	2	2	2	1	2	12221	11	7031029	7068553
MAD_Dr_004_137402	OTTDART00000042205	3	0	OTTDART00000030819 ; XR_029909.2 ; Dr.117529	0	1	136899	NA	NA	NA	ENSDARG00000092433	-	NA	NA	NA	NA	NA	ZDB-GENE-090313-374	si:dkeyp-115f6.1	1	2	2	2	1	2	12221	23	16518618	16519697
MAD_Dr_004_141607	ENSDART00000092749	1	1	OTTDART00000039692	0	1	141117	NA	NA	NA	ENSDARG00000077682	767697	NA	NA	NA	NA	zgc:153540	NA	NA	1	2	2	2	1	2	12221	NA	NA	NA
MAD_Dr_004_143819	ENSDART00000110923	1	1	OTTDART00000043419	0	1	16201	NA	NA	NA	ENSDARG00000073707	558834	NA	NA	NA	NA	si:dkey-92k1.12	ZDB-GENE-030131-8048	cnksr2b	1	2	2	2	1	2	12221	21	25388566	25486338
MAD_Dr_004_145306	NM_131447.1 ; Dr.150334	1	0	ENSDART00000104683	0	1	18135	NM_131447.1	NM_131447	pbx4	ENSDARG00000027695	30728	pre-B-cell leukemia transcription factor 4	Dr.150334	pbx4	pre-B-cell leukemia transcription factor 4	pre-B-cell leukemia transcription factor 1a; zgc:158824; pre-B-cell leukemia transcription factor 4; hypothetical LOC100004634; hypothetical protein LOC100150879	ZDB-GENE-000201-18	pbx4	1	2	2	2	1	2	12221	NA	NA	NA
MAD_Dr_004_148218	NM_001025472.1	5	0	Dr.78908 ; OTTDART00000038120 ; ENSDART00000015967 ; OTTDART00000038119 ; ENSDART00000110805	0	1	22065	NM_001025472.1	NM_001025472	lsrl	ENSDARG00000010025	553218	lsr like	NA	NA	NA	lsr like	ZDB-GENE-050913-73	lsr	1	2	2	2	1	2	12221	NA	NA	NA
MAD_Dr_004_151468	OTTDART00000039524 ; ENSDART00000111343 ; NM_001128764.1 ; Dr.148367	0	1		0	1	26437	NM_001128764.1	NM_001128764	zgc:194766	ENSDARG00000078094	571852	zgc:194766	Dr.148367	zgc:194766	zgc:194766	zgc:194766	ZDB-GENE-080723-47	lmf2a	1	2	2	2	1	2	12221	18	6747178	6768952
MAD_Dr_004_152216	Dr.76717 ; OTTDART00000036713	1	1	OTTDART00000036712	0	1	27476	NA	NA	NA	ENSDARG00000028386	64605	NA	Dr.76717	htatip2	HIV-1 Tat interactive protein 2	HIV-1 Tat interactive protein 2	ZDB-GENE-001219-1	htatip2	1	2	2	2	1	2	12221	7	16844308	16851210
MAD_Dr_004_152912	XM_690818.3 ; Dr.149107	0	1		0	1	28476	XM_690818.3	XM_690818	NA	ENSDARG00000087688	-	NA	Dr.149107	NA	NA	NA	NA	NA	1	2	2	2	1	2	12221	20	44892698	45417496
MAD_Dr_004_153969	ENSDART00000023831	1	1	OTTDART00000042834	0	1	30350	NA	NA	NA	ENSDARG00000019498	83776	NA	NA	NA	NA	cryptochrome 5	ZDB-GENE-010426-8	cry5	1	2	2	2	1	2	12221	10	39347036	39362396
MAD_Dr_004_154631	ENSDART00000079091	0	-	-	0	1	31277	NA	NA	NA	ENSDARG00000056587	563369	NA	NA	NA	NA	NA	ZDB-GENE-110114-1	cyp2r1	1	2	2	2	1	2	12221	7	27184128	27426041
MAD_Dr_004_157382	OTTDART00000037114 ; ENSDART00000027612	2	1	NM_001128230.1 ; Dr.75302	0	1	3580	NA	NA	NA	ENSDARG00000005540	407710	NA	NA	NA	NA	exportin 7	ZDB-GENE-060628-2	xpo7	1	2	2	2	1	2	12221	10	20112739	20171071
MAD_Dr_004_158921	OTTDART00000030249	1	0	Dr.15892	0	1	38107	NA	NA	NA	ENSDARG00000014148	415234	NA	NA	NA	NA	mediator complex subunit 22	ZDB-GENE-040625-156	med22	1	2	2	2	1	2	12221	5	32687458	32694594
MAD_Dr_004_159754	NM_001098246.1 ; Dr.77120	1	1	ENSDART00000112497	0	1	39268	NM_001098246.1	NM_001098246	zgc:198329	ENSDARG00000076981	557409	zgc:198329	Dr.77120	sc:d0817	sc:d0817	sc:d0817; sc:d0175	ZDB-GENE-080226-6	zgc:198329	1	2	2	2	1	2	12221	16	11667966	11678827
MAD_Dr_004_160818	ENSDART00000097328	3	0	OTTDART00000045344 ; Dr.75258 ; NM_001037430.1	0	1	40698	NA	NA	NA	ENSDARG00000067601	100334505	NA	NA	NA	NA	zgc:123303	ZDB-GENE-051120-177	arfgap2	1	2	2	2	1	2	12221	18	44856355	44880880
MAD_Dr_004_162544	OTTDART00000024940	4	1	ENSDART00000100924 ; ENSDART00000018979 ; Dr.38328 ; NM_213462.2	0	1	43142	NA	NA	NA	ENSDARG00000003382	406771	NA	NA	NA	NA	coiled-coil domain containing 49	ZDB-GENE-040426-2817	cwc25	1	2	2	2	1	2	12221	2	5797542	5811904
MAD_Dr_004_162709	OTTDART00000024230	0	-	-	0	1	43376	NA	NA	NA	ENSDARG00000021233	445494	NA	NA	NA	NA	NA	ZDB-GENE-040822-9	pgls	1	2	2	2	1	2	12221	3	52429893	52445947
MAD_Dr_004_163584	Dr.2933	1	1	NM_214685.2	0	1	44529	NA	NA	NA	ENSDARG00000006397	100003844	NA	Dr.2933	laptm4a	lysosomal-associated protein transmembrane 4 alpha	lysosomal-associated protein transmembrane 4 alpha	ZDB-GENE-030131-1024	laptm4a	1	2	2	2	1	2	12221	20	43878715	43889437
MAD_Dr_004_165784	ENSDART00000111588	1	1	NM_001114571.1	0	1	47768	NA	NA	NA	ENSDARG00000077303	100136852	NA	NA	NA	NA	zgc:174863	ZDB-GENE-080204-87	zgc:174863	1	2	2	2	1	2	12221	NA	NA	NA
MAD_Dr_004_165692	Dr.77772	2	0	ENSDART00000093031 ; NM_200312.1	0	1	47640	NA	NA	NA	ENSDARG00000069878	393282	NA	Dr.77772	zgc:56066	zgc:56066	hypothetical protein LOC100148478; zgc:56066	ZDB-GENE-040426-879	nhp2l1a	1	2	2	2	1	2	12221	3	58088071	58094730
MAD_Dr_004_165711	OTTDART00000029956	0	-	-	0	1	47671	NA	NA	NA	ENSDARG00000025820	336998	NA	NA	NA	NA	NA	ZDB-GENE-030131-8942	chek2	1	2	2	2	1	2	12221	5	9551342	9577606
MAD_Dr_004_168268	NM_001014358.1	2	1	XM_001331046.2 ; ENSDART00000058126	0	1	51338	NM_001014358.1	NM_001014358	zgc:110537	ENSDARG00000039764	541544	zgc:110537	NA	NA	NA	zgc:110537; hypothetical LOC791913	ZDB-GENE-050327-84	rnf152	1	2	2	2	1	2	12221	NA	NA	NA
MAD_Dr_004_169403	OTTDART00000022920	0	-	-	0	1	53037	NA	NA	NA	ENSDARG00000044437	559398	NA	NA	NA	NA	NA	ZDB-GENE-030131-235	cdca5	1	2	2	2	1	2	12221	5	66496914	66502431
MAD_Dr_004_169815	XM_695551.3 ; Dr.135335 ; ENSDART00000077106	0	1		0	1	53829	XM_695551.3	XM_695551	NA	ENSDARG00000054835	100415800	NA	Dr.135335	NA	NA	NA	ZDB-GENE-100406-6	ugt5f1	1	2	2	2	1	2	12221	18	1598295	1618813
MAD_Dr_004_170397	OTTDART00000031152	0	-	-	0	1	54655	NA	NA	NA	ENSDARG00000058638	8388607	NA	NA	NA	NA	NA	ZDB-GENE-070705-193	si:ch211-71m22.1	1	2	2	2	1	2	12221	2	8788948	8813670
MAD_Dr_004_170598	ENSDART00000102202	1	1	OTTDART00000038063	0	1	54926	NA	NA	NA	ENSDARG00000069940	559124	NA	NA	NA	NA	zgc:158309	ZDB-GENE-061201-42	ppap2d	1	2	2	2	1	2	12221	3	50511688	50576771
MAD_Dr_004_172267	NM_001002126.1 ; Dr.31051	1	1	ENSDART00000042050	0	1	57557	NM_001002126.1	NM_001002126	zgc:86776	ENSDARG00000030340	415216	zgc:86776	Dr.31051	im:7158008	im:7158008	zgc:86776	ZDB-GENE-040625-130	guk1a	1	2	2	2	1	2	12221	2	3186685	3203882
MAD_Dr_004_180756	ENSDART00000018739	2	1	OTTDART00000034871 ; NM_001002366.1	0	1	70479	NA	NA	NA	ENSDARG00000023443	436639	NA	NA	NA	NA	tight junction protein 2b (zona occludens 2)	ZDB-GENE-040718-58	tjp2b	1	2	2	2	1	2	12221	8	11287586	11505136
MAD_Dr_004_179967	ENSDART00000111453	1	1	XM_001920048.1	0	1	69269	NA	NA	NA	ENSDARG00000073761	562279	NA	NA	NA	NA	NA	NA	NA	1	2	2	2	1	2	12221	5	3619704	3650110
MAD_Dr_004_189753	OTTDART00000027489	2	0	NM_001012493.1 ; Dr.91080	0	1	88303	NA	NA	NA	ENSDARG00000038898	503529	NA	NA	NA	NA	zgc:113691	ZDB-GENE-050220-7	zgc:113691	1	2	2	2	1	2	12221	2	26936334	26941160
MAD_Dr_004_183131	OTTDART00000027387	0	-	-	0	1	74884	NA	NA	NA	ENSDARG00000015849	393242	NA	NA	NA	NA	NA	ZDB-GENE-040426-1099	zgc:56628	1	2	2	2	1	2	12221	NA	NA	NA
MAD_Dr_004_188977	XM_001334949.2 ; Dr.16667	1	1	OTTDART00000031113	0	1	86348	XM_001334949.2	XM_001334949	NA	ENSDARG00000075406	794920	NA	Dr.16667	pvrl4	poliovirus receptor-related 4	hypothetical LOC794920	NA	NA	1	2	2	2	1	2	12221	NA	NA	NA
MAD_Dr_004_189824	OTTDART00000031113	2	1	Dr.16667 ; XM_001334949.2	0	1	88381	NA	NA	NA	ENSDARG00000094356	794920	NA	NA	NA	NA	hypothetical LOC794920	ZDB-GENE-070912-114	pvrl4	1	2	2	2	1	2	12221	NA	NA	NA
MAD_Dr_004_191093	OTTDART00000034914	1	1	XM_688810.3	0	1	9016	NA	NA	NA	ENSDARG00000086345	-	NA	NA	NA	NA	NA	ZDB-GENE-081104-176	cux2b	1	2	2	2	1	2	12221	8	3987872	4270767
MAD_Dr_004_191200	OTTDART00000009653	1	0	Dr.75958	0	1	9030	NA	NA	NA	ENSDARG00000009387	560765	NA	NA	NA	NA	sc:d0823; roundabout homolog 4	ZDB-GENE-020809-1	robo4	1	2	2	2	1	2	12221	10	31358279	31394209
MAD_Dr_004_121380	ENSDART00000099224	2	1	Dr.75102 ; NM_130955.2	0	1	12181	NA	NA	NA	ENSDARG00000020219	30138	NA	NA	NA	NA	deltaD	ZDB-GENE-990415-47	dld	1	2	2	1	3	3	12213	13	5947112	5953343
MAD_Dr_004_125339	OTTDART00000040277	1	0	OTTDART00000040282	0	1	125555	NA	NA	NA	ENSDARG00000002026	8388607	NA	NA	NA	NA	NA	NA	NA	1	2	2	1	2	2	12212	13	3533388	3713096
MAD_Dr_004_129076	OTTDART00000019922 ; ENSDART00000088175 ; NM_001126406.1 ; Dr.90900	0	1		0	1	12899	NM_001126406.1	NM_001126406	marveld2b	ENSDARG00000061651	563122	MARVEL domain containing 2b	Dr.90900	marveld2b	MARVEL domain containing 2b	MARVEL domain containing 2b	ZDB-GENE-050208-54	marveld2b	1	2	2	1	2	2	12212	5	25604408	25611693
MAD_Dr_004_130731	OTTDART00000036481	4	0	Dr.136081 ; Dr.142718 ; NM_001102639.1 ; Dr.96197	0	1	130482	NA	NA	NA	ENSDARG00000011941	562822	NA	NA	NA	NA	bone morphogenetic protein receptor, type II a (serine/threonine kinase)	ZDB-GENE-070618-1	bmpr2a	1	2	2	1	2	2	12212	6	12562790	12633543
MAD_Dr_004_137180	OTTDART00000034046	0	-	-	0	1	136698	NA	NA	NA	ENSDARG00000095648	-	NA	NA	NA	NA	NA	ZDB-GENE-070912-439	si:dkey-216e24.4	1	2	2	1	2	2	12212	9	33433452	33435009
MAD_Dr_004_142922	XM_001923840.1 ; Dr.77885	0	1		0	1	15013	XM_001923840.1	XM_001923840	NA	ENSDARG00000051800	403074	NA	Dr.77885	NA	NA	formin binding protein 4	ZDB-GENE-130530-633	fnbp4	1	2	2	1	2	2	12212	25	28197257	28225574
MAD_Dr_004_143480	OTTDART00000007862	1	1	XM_694244.3	0	1	15750	NA	NA	NA	ENSDARG00000031240	570732	NA	NA	NA	NA	NA	ZDB-GENE-041014-170	kidins220a	1	2	2	1	2	2	12212	17	34861697	35015629
MAD_Dr_004_154181	ENSDART00000101354	2	0	NM_001045247.1 ; ENSDART00000106428	0	1	30601	NA	NA	NA	ENSDARG00000074151	-	NA	NA	NA	NA	zgc:158517	ZDB-GENE-080213-7	zgc:174234	1	2	2	1	2	2	12212	NA	NA	NA
MAD_Dr_004_155674	OTTDART00000029104	1	1	ENSDART00000044738	0	1	33474	NA	NA	NA	ENSDARG00000007247	449546	NA	NA	NA	NA	NA	ZDB-GENE-040927-18	ric8a	1	2	2	1	2	2	12212	25	10362219	10386420
MAD_Dr_004_157106	XM_682758.3 ; Dr.87369	0	1		0	1	35456	XM_682758.3	XM_682758	NA	ENSDARG00000035161	559418	NA	Dr.87369	NA	NA	vertebrate lonesome kinase	ZDB-GENE-081107-30	pkdcca	1	2	2	1	2	2	12212	13	2975430	3022092
MAD_Dr_004_170605	NM_200377.1	1	0	OTTDART00000038271	0	1	54937	NM_200377.1	NM_200377	zgc:64106	ENSDARG00000011371	393348	zgc:64106	NA	NA	NA	zgc:64106	ZDB-GENE-040426-1370	zgc:64106	1	2	2	1	2	2	12212	21	11892177	11904141
MAD_Dr_004_176986	Dr.81243	3	0	ENSDART00000078119 ; OTTDART00000028495 ; NM_001002108.2	0	1	64634	NA	NA	NA	ENSDARG00000055719	791987	NA	Dr.81243	zgc:86850	zgc:86850	zgc:86850	ZDB-GENE-040625-97	ino80c	1	2	2	1	2	2	12212	16	26977039	26982503
MAD_Dr_004_181361	OTTDART00000037148	1	0	NM_001098781.1	0	1	71970	NA	NA	NA	ENSDARG00000060196	8388607	NA	NA	NA	NA	NA	ZDB-GENE-070615-43	lhpp	1	2	2	1	2	2	12212	12	46934399	46943805
MAD_Dr_004_183104	XM_678006.1 ; Dr.113683 ; OTTDART00000041738 ; ENSDART00000114941	0	1		0	1	74828	XM_678006.1	XM_678006	NA	ENSDARG00000075112	555482	NA	Dr.113683	NA	NA	NA	ZDB-GENE-090312-106	tacr3a	1	2	2	1	2	2	12212	1	43100793	43191185
MAD_Dr_004_196437	ENSDART00000060723	0	-	-	0	1	96737	NA	NA	NA	ENSDARG00000041425	-	NA	NA	NA	NA	NA	NA	NA	1	2	2	1	2	2	12212	NA	NA	NA
MAD_Dr_004_500345	Dr.132384	4	0	gi|503397 ; gi|500345 ; gi|180761 ; gi|170548	1	1	-2	NA	NA	NA	ENSDARG00000028275	323424	NA	Dr.132384	sult1st1	sulfotransferase family 1, cytosolic sulfotransfer	sulfotransferase family 1, cytosolic sulfotransferase 1	ZDB-GENE-030131-2144	sult1st1	1	2	2	1	2	2	12212	8	46438659	46501315
MAD_Dr_004_122706	NM_001131053.2	3	1	Dr.121290 ; ENSDART00000061007 ; OTTDART00000015431	0	1	123186	NM_001131053.2	NM_001131053	mt2	ENSDARG00000044491	100174951	metallothionein 2	NA	NA	NA	metallothionein 2; metallothionein; kinesin family member 20A	NA	NA	1	2	2	1	1	2	12211	21	34845295	34892129
MAD_Dr_004_146327	OTTDART00000034366	1	1	ENSDART00000059670	0	1	19423	NA	NA	NA	ENSDARG00000040730	368478	NA	NA	NA	NA	NA	ZDB-GENE-030616-5	wdr75	1	2	2	1	1	2	12211	9	41318371	41355185
MAD_Dr_004_103174	NM_001030199.1	1	1	ENSDART00000051699	0	1	103310	NM_001030199.1	NM_001030199	zgc:114142	ENSDARG00000035652	565700	zgc:114142	NA	NA	NA	hypothetical protein LOC100149842; zgc:114142	ZDB-GENE-050913-41	sat1a.1	1	2	2	1	1	2	12211	5	3999159	4040700
MAD_Dr_004_168330	NM_001030255.1 ; Dr.78336	0	1		0	1	51433	NM_001030255.1	NM_001030255	pggt1b	ENSDARG00000058613	570808	protein geranylgeranyltransferase type I, beta sub	Dr.78336	pggt1b	protein geranylgeranyltransferase type I, beta sub	protein geranylgeranyltransferase type I, beta subunit	ZDB-GENE-050913-85	pggt1b	1	2	2	1	1	2	12211	NA	NA	NA
MAD_Dr_004_103849	ENSDART00000014098	2	0	Dr.8018 ; NM_213005.1	0	1	103973	NA	NA	NA	ENSDARG00000005085	406278	NA	NA	NA	NA	gamma-glutamyl cyclotransferase	ZDB-GENE-040426-1939	ggctb	1	2	2	1	1	2	12211	16	54000890	54023177
MAD_Dr_004_141435	OTTDART00000039905	1	1	ENSDART00000074975	0	1	140957	NA	NA	NA	ENSDARG00000053013	553772	NA	NA	NA	NA	zgc:110063	ZDB-GENE-050522-367	zgc:110063	1	2	2	1	1	2	12211	NA	NA	NA
MAD_Dr_004_105795	OTTDART00000029467	3	1	ENSDART00000010975 ; NM_200457.1 ; OTTDART00000029466	0	1	105992	NA	NA	NA	ENSDARG00000012271	393429	NA	NA	NA	NA	hypothetical LOC792036; transmembrane protein 206	ZDB-GENE-040426-1173	tmem206	1	2	2	1	1	2	12211	17	45395656	45403882
MAD_Dr_004_153843	OTTDART00000026019	0	-	-	0	1	30134	NA	NA	NA	ENSDARG00000058230	406349	NA	NA	NA	NA	NA	ZDB-GENE-040426-2038	rps6kb1b	1	2	2	1	1	2	12211	15	17470898	17488568
MAD_Dr_004_151540	ENSDART00000054981	1	1	OTTDART00000027330	0	1	26524	NA	NA	NA	ENSDARG00000037739	503706	NA	NA	NA	NA	zgc:112980	ZDB-GENE-050306-1	zgc:112980	1	2	2	1	1	2	12211	1	7855560	7869187
MAD_Dr_004_114003	ENSDART00000058424	2	1	Dr.38295 ; NM_001077806.1	0	1	11442	NA	NA	NA	ENSDARG00000039943	777768	NA	NA	NA	NA	family with sequence similarity 46, member B	ZDB-GENE-061110-129	fam46ba	1	2	2	1	1	2	12211	16	34092703	34102413
MAD_Dr_004_112474	ENSDART00000086738	4	1	Dr.82602 ; XM_001332703.2 ; ENSDART00000086737 ; ENSDART00000086733	0	1	112794	NA	NA	NA	ENSDARG00000097677	-	NA	NA	NA	NA	NA	NA	NA	1	2	2	1	1	2	12211	25	36724307	36751116
MAD_Dr_004_165112	NM_001037419.1 ; Dr.88672	1	0	XM_001331211.2	0	1	46772	NM_001037419.1	NM_001037419	zgc:123296	ENSDARG00000040387	641478	zgc:123296	Dr.88672	zgc:123296	zgc:123296	zgc:123296	ZDB-GENE-051120-39	mmd	1	2	2	1	1	2	12211	3	11581973	11609794
MAD_Dr_004_112837	OTTDART00000026095	1	1	OTTDART00000026093	0	1	113135	NA	NA	NA	ENSDARG00000007885	406255	NA	NA	NA	NA	NA	ZDB-GENE-040426-1045	fancl	1	2	2	1	1	2	12211	13	26573447	26650347
MAD_Dr_004_180590	OTTDART00000041349	0	-	-	0	1	70194	NA	NA	NA	ENSDARG00000052520	556193	NA	NA	NA	NA	NA	ZDB-GENE-070730-2	sgms2	1	2	2	1	1	2	12211	1	49289826	49306817
MAD_Dr_004_116882	Dr.84440	2	0	NM_001172634.1 ; ENSDART00000101044	0	1	117417	NA	NA	NA	ENSDARG00000069425	541432	NA	Dr.84440	zgc:113055	zgc:113055	zgc:113055	ZDB-GENE-050320-136	hsbp1a	1	2	2	1	1	2	12211	7	26357955	26362866
MAD_Dr_004_120615	Dr.114981	4	1	OTTDART00000023270 ; OTTDART00000023262 ; OTTDART00000023266 ; Dr.33836	0	1	121053	NA	NA	NA	ENSDARG00000067852	793802	NA	Dr.114981	NA	NA	hypothetical LOC793992; hypothetical LOC794063; hypothetical protein LOC793802	ZDB-GENE-060526-191	si:dkey-111e8.4	1	2	2	1	1	2	12211	NA	NA	NA
MAD_Dr_004_124149	ENSDART00000037286	12	0	ENSDART00000105276 ; Dr.120188 ; NM_001102634.1 ; ENSDART00000105297 ; NM_001110386.1 ; OTTDART00000013896 ; OTTDART00000014180 ; OTTDART00000014171 ; OTTDART00000014174 ; NM_001110388.1 ; Dr.75545 ; OTTDART00000014177	0	1	124670	NA	NA	NA	ENSDARG00000094199	561329	NA	NA	NA	NA	si:ch211-154a22.8	ZDB-GENE-050208-695	si:ch211-226h8.8	1	2	2	1	1	2	12211	22	25214698	25222503
MAD_Dr_004_122690	OTTDART00000045647	4	1	ENSDART00000084063 ; ENSDART00000023316 ; Dr.4658 ; NM_200623.1	0	1	123167	NA	NA	NA	ENSDARG00000095879	393596	NA	NA	NA	NA	NA	ZDB-GENE-040426-1264	wdr46	1	2	2	1	1	2	12211	8	53201936	53218175
MAD_Dr_004_123317	OTTDART00000038986	0	-	-	0	1	12378	NA	NA	NA	ENSDARG00000036826	553206	NA	NA	NA	NA	NA	ZDB-GENE-050522-247	ankrd52a	1	2	2	1	1	2	12211	23	32435554	32464211
MAD_Dr_004_123903	Dr.117438	1	0	OTTDART00000037587	0	1	124426	NA	NA	NA	ENSDARG00000070232	799515	NA	Dr.117438	zgc:163080	zgc:163080	zgc:163080	ZDB-GENE-070410-137	zgc:163080	1	2	2	1	1	2	12211	NA	NA	NA
MAD_Dr_004_126392	ENSDART00000103828	0	-	-	0	1	126460	NA	NA	NA	ENSDARG00000070588	-	NA	NA	NA	NA	NA	NA	NA	1	2	2	1	1	2	12211	NA	NA	NA
MAD_Dr_004_128029	OTTDART00000041903	0	-	-	0	1	128026	NA	NA	NA	ENSDARG00000035080	565831	NA	NA	NA	NA	si:ch211-237a6.7	ZDB-GENE-030131-1458	hsf2bp	1	2	2	1	1	2	12211	1	28298179	28340169
MAD_Dr_004_128906	OTTDART00000023270	4	0	OTTDART00000023262 ; Dr.33836 ; OTTDART00000023266 ; Dr.114981	0	1	128836	NA	NA	NA	ENSDARG00000094849	-	NA	NA	NA	NA	NA	ZDB-GENE-060526-190	si:dkey-111e8.3	1	2	2	1	1	2	12211	5	37422424	37427476
MAD_Dr_004_158950	XM_001335557.1	0	-	-	0	1	38155	XM_001335557.1	XM_001335557	NA	ENSDARG00000086173	795414	NA	NA	NA	NA	NA	ZDB-GENE-030131-9531	relb	1	2	2	1	1	2	12211	15	17164390	17189195
MAD_Dr_004_141213	ENSDART00000039598	1	1	OTTDART00000023122	0	1	140753	NA	NA	NA	ENSDARG00000026218	100334080	NA	NA	NA	NA	NA	ZDB-GENE-030131-2159	slc1a3a	1	2	2	1	1	2	12211	NA	NA	NA
MAD_Dr_004_141214	OTTDART00000023122	1	1	ENSDART00000039598	0	1	140754	NA	NA	NA	ENSDARG00000026248	323439	NA	NA	NA	NA	solute carrier family 1 (glial high affinity glutamate transporter), member 3	ZDB-GENE-030131-2159	slc1a3a	1	2	2	1	1	2	12211	23	42054150	42201708
MAD_Dr_004_199491	ENSDART00000050971	2	1	Dr.82947 ; NM_200683.1	0	1	99858	NA	NA	NA	ENSDARG00000035188	393656	NA	NA	NA	NA	RAB14, member RAS oncogene family, like; hypothetical protein LOC100148386	ZDB-GENE-040426-1207	rab14l	1	2	2	1	1	2	12211	5	71388228	71394233
MAD_Dr_004_143608	ENSDART00000006412	0	-	-	0	1	15908	NA	NA	NA	ENSDARG00000006151	569112	NA	NA	NA	NA	phosphodiesterase 11a, like	ZDB-GENE-031118-106	pde11al	1	2	2	1	1	2	12211	16	21338649	21379959
MAD_Dr_004_167270	NM_152248.1	6	1	OTTDART00000024493 ; ENSDART00000065135 ; ENSDART00000065137 ; OTTDART00000024492 ; Dr.32588 ; NM_152986.1	0	1	49911	NM_152248.1	NM_152248	tp63	ENSDARG00000044356	260407	tumor protein p63	NA	NA	NA	tumor protein p63	ZDB-GENE-030819-1	tp63	1	2	2	1	1	2	12211	6	28805219	28923664
MAD_Dr_004_145414	OTTDART00000027773	3	1	ENSDART00000053932 ; Dr.82555 ; NM_001111232.1	0	1	18265	NA	NA	NA	ENSDARG00000053500	550524	NA	NA	NA	NA	NA	ZDB-GENE-050417-367	cbsa	1	2	2	1	1	2	12211	1	28264817	28289730
MAD_Dr_004_145770	ENSDART00000109678	2	1	Dr.77723 ; XM_001919073.1	0	1	18722	NA	NA	NA	ENSDARG00000075798	100332785	NA	NA	NA	NA	NA	NA	NA	1	2	2	1	1	2	12211	1	34741279	34756707
MAD_Dr_004_146674	OTTDART00000033707	0	-	-	0	1	19853	NA	NA	NA	ENSDARG00000095580	558829	NA	NA	NA	NA	NA	ZDB-GENE-030131-7044	si:ch211-67e16.11	1	2	2	1	1	2	12211	9	14181008	14226301
MAD_Dr_004_147445	OTTDART00000039463	0	-	-	0	1	20930	NA	NA	NA	ENSDARG00000057128	553401	NA	NA	NA	NA	NA	ZDB-GENE-031222-5	hadhaa	1	2	2	1	1	2	12211	20	48484539	48555271
MAD_Dr_004_147548	OTTDART00000009960	1	1	XM_001921071.1	0	1	21068	NA	NA	NA	ENSDARG00000055373	799945	NA	NA	NA	NA	NA	ZDB-GENE-050513-2	sema3fb	1	2	2	1	1	2	12211	11	35186568	35313808
MAD_Dr_004_150068	Dr.107449	0	-	-	0	1	24520	NA	NA	NA	ENSDARG00000058391	399546	NA	Dr.107449	pxn	paxillin	paxillin	ZDB-GENE-040105-1	pxna	1	2	2	1	1	2	12211	NA	NA	NA
MAD_Dr_004_151876	OTTDART00000004127	4	1	ENSDART00000101667 ; OTTDART00000004126 ; OTTDART00000004121 ; OTTDART00000036966	0	1	26961	NA	NA	NA	ENSDARG00000001234	678610	NA	NA	NA	NA	mitogen-activated protein kinase kinase kinase kinase 2-like	ZDB-GENE-030616-163	map4k2	1	2	2	1	1	2	12211	7	17396958	17439010
MAD_Dr_004_152107	ENSDART00000101707	0	-	-	0	1	27310	NA	NA	NA	ENSDARG00000041586	570225	NA	NA	NA	NA	NA	ZDB-GENE-080507-1	dhx40	1	2	2	1	1	2	12211	15	17322221	17349166
MAD_Dr_004_153496	NM_001002154.1	1	1	ENSDART00000026120	0	1	29407	NM_001002154.1	NM_001002154	ap3m2	ENSDARG00000016128	415244	adaptor-related protein complex 3, mu 2 subunit	NA	NA	NA	adaptor-related protein complex 3, mu 2 subunit	ZDB-GENE-021022-2	ap3m2	1	2	2	1	1	2	12211	5	13874891	13890228
MAD_Dr_004_155038	OTTDART00000027572	0	-	-	0	1	31802	NA	NA	NA	ENSDARG00000040678	678566	NA	NA	NA	NA	NA	ZDB-GENE-060421-8315	ccdc93	1	2	2	1	1	2	12211	9	38543657	38558343
MAD_Dr_004_157092	NM_200106.1 ; Dr.81393	2	1	ENSDART00000018328 ; OTTDART00000018814	0	1	35438	NM_200106.1	NM_200106	fbxl2	ENSDARG00000012135	378737	F-box and leucine-rich repeat protein 2	Dr.81393	fbxl2	F-box and leucine-rich repeat protein 2	F-box and leucine-rich repeat protein 2	ZDB-GENE-030925-12	fbxl2	1	2	2	1	1	2	12211	19	43090721	43113510
MAD_Dr_004_158139	ENSDART00000110994	2	0	Dr.88249 ; NM_001110039.1	0	1	36963	NA	NA	NA	ENSDARG00000079946	799528	NA	NA	NA	NA	zgc:171801	ZDB-GENE-071004-98	sqlea	1	2	2	1	1	2	12211	16	43497274	43510214
MAD_Dr_004_500726	Dr.32623	4	0	gi|503122 ; gi|500726 ; gi|159644 ; gi|110770	1	1	-2	NA	NA	NA	ENSDARG00000007786	415203	NA	Dr.32623	tmx2	thioredoxin-related transmembrane protein 2	thioredoxin-related transmembrane protein 2	ZDB-GENE-040625-105	tmx2b	1	2	2	1	1	2	12211	1	43867979	43880634
MAD_Dr_004_159708	OTTDART00000001444 ; NM_001007207.1 ; Dr.76911	2	0	OTTDART00000025498 ; ENSDART00000047912	0	1	39205	NM_001007207.1	NM_001007207	t54l	ENSDARG00000029612	368735	T54 protein-like	Dr.76911	t54l	T54 protein-like	T54 protein-like	ZDB-GENE-030616-159	gpkow	1	2	2	1	1	2	12211	8	36559357	36585639
MAD_Dr_004_160419	XM_001923945.1 ; Dr.133104	2	1	XM_001923944.1 ; XM_001923947.1	0	1	40168	XM_001923945.1	XM_001923945	NA	ENSDARG00000071811	100149334	NA	Dr.133104	si:dkey-4c15.6	si:dkey-4c15.6	similar to zinc finger protein 85; si:dkey-15h8.15	ZDB-GENE-050208-547	si:dkey-15h8.14	1	2	2	1	1	2	12211	NA	NA	NA
MAD_Dr_004_160925	NM_001114898.1 ; Dr.43322	1	1	ENSDART00000101067	0	1	40835	NM_001114898.1	NM_001114898	zgc:171570	ENSDARG00000078988	100141333	zgc:171570	Dr.43322	zgc:171570	zgc:171570	zgc:171570	ZDB-GENE-080220-9	zgc:171570	1	2	2	1	1	2	12211	NA	NA	NA
MAD_Dr_004_161161	NM_001020700.1	1	0	ENSDART00000013059	0	1	41123	NM_001020700.1	NM_001020700	zgc:112450	ENSDARG00000016016	553729	zgc:112450	NA	NA	NA	similar to Drebrin-like protein (SH3 domain-containing protein 7) (Actin-binding protein 1); zgc:112450	ZDB-GENE-050522-293	dbnlb	1	2	2	1	1	2	12211	8	52328048	52363850
MAD_Dr_004_161211	ENSDART00000110709	0	-	-	0	1	41190	NA	NA	NA	ENSDARG00000079766	100333303	NA	NA	NA	NA	NA	ZDB-GENE-050517-43	tap1	1	2	2	1	1	2	12211	16	48736637	48763813
MAD_Dr_004_161333	ENSDART00000101067	2	1	Dr.43322 ; NM_001114898.1	0	1	41367	NA	NA	NA	ENSDARG00000015482	100141333	NA	NA	NA	NA	zgc:171570	ZDB-GENE-080220-9	zgc:171570	1	2	2	1	1	2	12211	2	187800	195140
MAD_Dr_004_168787	ENSDART00000026067	1	1	NM_213525.1	0	1	52096	NA	NA	NA	ENSDARG00000029480	406846	NA	NA	NA	NA	similar to Sperm antigen with calponin homology and coiled-coil domains 1 (Nuclear structure protein 5) (NSP5) (Sperm antigen HCMOGT-1); CDKN1A interacting zinc finger protein 1	ZDB-GENE-060526-207	specc1	1	2	2	1	1	2	12211	5	62122699	62303733
MAD_Dr_004_173754	ENSDART00000109338 ; ENSDART00000098970	4	1	ENSDART00000007150 ; Dr.24217 ; NM_201091.1 ; OTTDART00000018111	0	1	59740	NA	NA	NA	ENSDARG00000016999	394066	NA	NA	NA	NA	lin-28 homolog (C. elegans)	ZDB-GENE-040426-747	lin28a	1	2	2	1	1	2	12211	19	15536660	15564825
MAD_Dr_004_161707	NM_001037698.1	0	-	-	0	1	41898	NM_001037698.1	NM_001037698	snx2	ENSDARG00000053356	568737	sorting nexin 2	NA	NA	NA	sorting nexin 2	ZDB-GENE-051120-45	snx2	1	2	2	1	1	2	12211	NA	NA	NA
MAD_Dr_004_176907	ENSDART00000055554	1	1	OTTDART00000029803	0	1	64508	NA	NA	NA	ENSDARG00000038106	406465	NA	NA	NA	NA	solute carrier family 37 (glucose-6-phosphate tran	ZDB-GENE-040426-2230	slc37a4a	1	2	2	1	1	2	12211	15	9318549	9339495
MAD_Dr_004_163396	ENSDART00000106537 ; ENSDART00000065917	1	0	NM_001111221.1	0	1	44262	NA	NA	NA	ENSDARG00000044847	-	NA	NA	NA	NA	NA	ZDB-GENE-080219-33	zgc:171599	1	2	2	1	1	2	12211	17	49531632	49537118
MAD_Dr_004_163742	OTTDART00000024614	3	0	ENSDART00000104200 ; Dr.89785 ; NM_001005400.1	0	1	44751	NA	NA	NA	ENSDARG00000032206	445818	NA	NA	NA	NA	cystathionase (cystathionine gamma-lyase); cystathionase (cystathionine gamma-lyase), like	ZDB-GENE-040905-3	cthl	1	2	2	1	1	2	12211	6	37364437	37425603
MAD_Dr_004_163937	ENSDART00000112888	1	0	OTTDART00000029541	0	1	45011	NA	NA	NA	ENSDARG00000075053	-	NA	NA	NA	NA	zgc:174379	NA	NA	1	2	2	1	1	2	12211	17	11984649	12001948
MAD_Dr_004_165603	ENSDART00000003745	3	0	OTTDART00000044685 ; Dr.155155 ; NM_131872.2	0	1	47500	NA	NA	NA	ENSDARG00000010008	140599	NA	NA	NA	NA	vimentin	ZDB-GENE-011212-3	vim	1	2	2	1	1	2	12211	24	32261512	32278038
MAD_Dr_004_165861	XM_688803.2 ; ENSDART00000085076	0	1		0	1	47872	XM_688803.2	XM_688803	NA	ENSDARG00000074527	565523	NA	NA	NA	NA	NA	ZDB-GENE-131127-327	si:dkey-59k9.3	1	2	2	1	1	2	12211	17	21494941	21541326
MAD_Dr_004_167286	ENSDART00000051664	2	0	Dr.87837 ; NM_001003780.1	0	1	49930	NA	NA	NA	ENSDARG00000035630	554488	NA	NA	NA	NA	yippee-like 1 (Drosophila); similar to Protein yippee-like 1	ZDB-GENE-040808-41	ypel1	1	2	2	1	1	2	12211	5	12536889	12586399
MAD_Dr_004_167193	OTTDART00000037756	3	0	ENSDART00000091277 ; Dr.78073 ; NM_001076716.1	0	1	49798	NA	NA	NA	ENSDARG00000044574	767747	NA	NA	NA	NA	RNA binding motif, single stranded interacting protein	ZDB-GENE-060929-244	rbms3	1	2	2	1	1	2	12211	16	39693236	39950633
MAD_Dr_004_167277	OTTDART00000002183	3	1	ENSDART00000101150 ; Dr.31089 ; XM_693577.3	0	1	49921	NA	NA	NA	ENSDARG00000027172	570136	NA	NA	NA	NA	phosphatase and actin regulator 2	ZDB-GENE-040724-11	phactr2	1	2	2	1	1	2	12211	13	23782128	23825822
MAD_Dr_004_169795	ENSDART00000041787 ; ENSDART00000103464	0	1		0	1	53801	NA	NA	NA	ENSDARG00000021021	-	NA	NA	NA	NA	NA	ZDB-GENE-071004-19	trim35-28	1	2	2	1	1	2	12211	16	26566076	26572879
MAD_Dr_004_169843	OTTDART00000027944	0	-	-	0	1	53868	NA	NA	NA	ENSDARG00000036650	492807	NA	NA	NA	NA	NA	ZDB-GENE-041114-163	cdadc1	1	2	2	1	1	2	12211	1	45925774	45941734
MAD_Dr_004_171991	ENSDART00000040812	3	1	OTTDART00000028831 ; Dr.15726 ; NM_200310.1	0	1	57160	NA	NA	NA	ENSDARG00000034624	393280	NA	NA	NA	NA	zgc:56708	ZDB-GENE-040426-1121	nuf2	1	2	2	1	1	2	12211	11	403271	412020
MAD_Dr_004_170069	ENSDART00000084076	0	-	-	0	1	54201	NA	NA	NA	ENSDARG00000060001	768200	NA	NA	NA	NA	zgc:153060	ZDB-GENE-061013-752	mettl9	1	2	2	1	1	2	12211	12	956855	964213
MAD_Dr_004_170217	OTTDART00000041358	0	-	-	0	1	54408	NA	NA	NA	ENSDARG00000026548	556280	NA	NA	NA	NA	NA	ZDB-GENE-070730-1	cyp2u1	1	2	2	1	1	2	12211	1	49279576	49288214
MAD_Dr_004_171306	ENSDART00000108997 ; XM_682091.3	0	1		0	1	56035	XM_682091.3	XM_682091	NA	ENSDARG00000075906	558824	NA	NA	NA	NA	NA	ZDB-GENE-130530-788	adad2	1	2	2	1	1	2	12211	NA	NA	NA
MAD_Dr_004_171827	OTTDART00000028451	0	-	-	0	1	56926	NA	NA	NA	ENSDARG00000040350	436798	NA	NA	NA	NA	ribonuclease P/MRP 38 subunit	ZDB-GENE-040718-258	rpp38	1	2	2	1	1	2	12211	16	28657872	28659558
MAD_Dr_004_172395	OTTDART00000041079	0	-	-	0	1	5775	NA	NA	NA	ENSDARG00000060716	-	NA	NA	NA	NA	NA	ZDB-GENE-090313-408	prkx	1	2	2	1	1	2	12211	1	32485343	32551121
MAD_Dr_004_172686	ENSDART00000026152 ; OTTDART00000012671	0	1		0	1	5819	NA	NA	NA	ENSDARG00000010181	570669	NA	NA	NA	NA	NA	ZDB-GENE-041210-256	asap2a	1	2	2	1	1	2	12211	17	35149073	35275536
MAD_Dr_004_172754	Dr.116127	1	0	OTTDART00000028536	0	1	58298	NA	NA	NA	ENSDARG00000061314	569275	NA	Dr.116127	si:ch211-199o1.5	si:ch211-199o1.5	si:ch211-199o1.5	ZDB-GENE-060503-19	si:ch211-199o1.5	1	2	2	1	1	2	12211	8	25015390	25021623
MAD_Dr_004_175037	ENSDART00000033263	3	0	XM_001331051.2 ; Dr.84465 ; NM_001017584.1	0	1	61644	NA	NA	NA	ENSDARG00000023508	550246	NA	NA	NA	NA	hypothetical LOC791932; zgc:110718	ZDB-GENE-050417-46	ankrd49	1	2	2	1	1	2	12211	15	2887692	2894167
MAD_Dr_004_173526	NM_001077335.1	1	0	XM_001344453.2	0	1	59438	NM_001077335.1	NM_001077335	zgc:153092	ENSDARG00000067665	768193	zgc:153092	NA	NA	NA	zgc:153092; hypothetical LOC100005426	ZDB-GENE-061013-209	fam167aa	1	2	2	1	1	2	12211	17	5454070	5462872
MAD_Dr_004_174346	ENSDART00000101207	2	0	Dr.49001 ; NM_001077321.1	0	1	60630	NA	NA	NA	ENSDARG00000069499	100333737	NA	NA	NA	NA	NA	NA	NA	1	2	2	1	1	2	12211	16	54827388	54831350
MAD_Dr_004_174461	OTTDART00000026024	0	-	-	0	1	60814	NA	NA	NA	ENSDARG00000024278	402841	NA	NA	NA	NA	NA	ZDB-GENE-030529-2	adh8b	1	2	2	1	1	2	12211	13	12500748	12514277
MAD_Dr_004_174699	OTTDART00000015950	0	-	-	0	1	61163	NA	NA	NA	ENSDARG00000002571	447869	NA	NA	NA	NA	NA	ZDB-GENE-040912-185	tmod2	1	2	2	1	1	2	12211	18	39346002	39401861
MAD_Dr_004_177495	OTTDART00000026238	1	1	NM_001004615.1	0	1	65382	NA	NA	NA	ENSDARG00000054251	447876	NA	NA	NA	NA	PQ loop repeat containing 3	ZDB-GENE-040912-40	pqlc3	1	2	2	1	1	2	12211	13	32676969	32682453
MAD_Dr_004_176779	OTTDART00000025373	3	0	ENSDART00000055055 ; NM_001025465.1 ; Dr.45502	0	1	64305	NA	NA	NA	ENSDARG00000037782	386704	NA	NA	NA	NA	SRY-box containing gene 8	ZDB-GENE-031114-1	sox8b	1	2	2	1	1	2	12211	3	62161088	62166920
MAD_Dr_004_180400	ENSDART00000104399	3	1	OTTDART00000017985 ; OTTDART00000019548 ; ENSDART00000111756	0	1	69897	NA	NA	NA	ENSDARG00000003511	336283	NA	NA	NA	NA	mitochondrial ribosomal protein L3	ZDB-GENE-030131-8227	mrpl3	1	2	2	1	1	2	12211	NA	NA	NA
MAD_Dr_004_179051	ENSDART00000097192	2	0	ENSDART00000090800 ; Dr.151331	0	1	67916	NA	NA	NA	ENSDARG00000035227	100331554	NA	NA	NA	NA	NA	NA	NA	1	2	2	1	1	2	12211	NA	NA	NA
MAD_Dr_004_179069	Dr.80286	3	0	ENSDART00000050221 ; OTTDART00000008574 ; NM_173254.1	0	1	67948	NA	NA	NA	ENSDARG00000030694	192335	NA	Dr.80286	atp6v1e1	ATPase, H+ transporting, lysosomal, V1 subunit E i	ATPase, H+ transporting, lysosomal, V1 subunit E isoform 1	ZDB-GENE-020419-11	atp6v1e1b	1	2	2	1	1	2	12211	4	5231556	5238765
MAD_Dr_004_180492	OTTDART00000023565	3	1	ENSDART00000060979 ; Dr.118048 ; NM_001002453.1	0	1	70023	NA	NA	NA	ENSDARG00000041602	436726	NA	NA	NA	NA	zgc:92335	ZDB-GENE-040718-152	zgc:92335	1	2	2	1	1	2	12211	22	12570367	12579927
MAD_Dr_004_179213	NM_001003618.1 ; Dr.111296	2	1	ENSDART00000110921 ; ENSDART00000066987	0	1	68173	NM_001003618.1	NM_001003618	zgc:100960	ENSDARG00000045554	445224	zgc:100960	Dr.111296	zgc:100960	zgc:100960	zgc:100960	ZDB-GENE-040801-137	mphosph6	1	2	2	1	1	2	12211	25	35452612	35458302
MAD_Dr_004_180556	ENSDART00000066307	0	-	-	0	1	70126	NA	NA	NA	ENSDARG00000045095	445109	NA	NA	NA	NA	elaC homolog 1 (E. coli)	ZDB-GENE-040801-246	elac1	1	2	2	1	1	2	12211	5	6291778	6301560
MAD_Dr_004_502375	ENSDART00000106057	4	0	gi|502375 ; gi|182331 ; gi|503473 ; gi|188350	1	1	-2	NA	NA	NA	ENSDARG00000071626	-	NA	NA	NA	NA	zgc:153154	ZDB-GENE-060825-337	zgc:153154	1	2	2	1	1	2	12211	24	16877092	16884954
MAD_Dr_004_182511	ENSDART00000091546	1	1	OTTDART00000036877	0	1	73917	NA	NA	NA	ENSDARG00000062943	570857	NA	NA	NA	NA	zgc:162204	ZDB-GENE-070410-35	taco1	1	2	2	1	1	2	12211	12	9267989	9277959
MAD_Dr_004_186179	NM_001109728.1	2	1	ENSDART00000111999 ; ENSDART00000115112	0	1	79535	NM_001109728.1	NM_001109728	NA	ENSDARG00000077254	797125	NA	NA	NA	NA	zgc:110848; hypothetical protein LOC797125	NA	NA	1	2	2	1	1	2	12211	NA	NA	NA
MAD_Dr_004_189440	XM_687428.3	0	-	-	0	1	87889	XM_687428.3	XM_687428	NA	ENSDARG00000088178	-	NA	NA	NA	NA	NA	NA	NA	1	2	2	1	1	2	12211	11	25019406	25028619
MAD_Dr_004_190868	OTTDART00000036399	0	-	-	0	1	89823	NA	NA	NA	ENSDARG00000036636	768138	NA	NA	NA	NA	NA	ZDB-GENE-030616-542	ebpl	1	2	2	1	1	2	12211	1	45968981	45972765
MAD_Dr_004_192401	Dr.103951	4	0	NM_001123264.1 ; XM_001922665.1 ; ENSDART00000101135 ; OTTDART00000034893	0	1	91910	NA	NA	NA	ENSDARG00000069468	563100	NA	Dr.103951	si:ch211-51h9.6	si:ch211-51h9.6	hypothetical protein LOC563100	ZDB-GENE-081104-234	si:ch211-51h9.6	1	2	2	1	1	2	12211	NA	NA	NA
MAD_Dr_004_502274	ENSDART00000103745	3	1	gi|502274 ; gi|192778 ; gi|170373	1	1	-2	NA	NA	NA	ENSDARG00000035997	-	NA	NA	NA	NA	zinc finger protein, multitype 2b	ZDB-GENE-060130-5	zfpm2b	1	2	2	1	1	2	12211	NA	NA	NA
MAD_Dr_004_199453	NM_194378.3 ; Dr.76631	1	1	OTTDART00000039768	0	1	9982	NM_194378.3	NM_194378	arpc5a	ENSDARG00000039142	336504	actin related protein 2/3 complex, subunit 5A	Dr.76631	arpc5a	actin related protein 2/3 complex, subunit 5A	actin related protein 2/3 complex, subunit 5A	ZDB-GENE-030131-8448	arpc5a	1	2	2	1	1	2	12211	2	21309611	21317616
MAD_Dr_004_199478	OTTDART00000035061	0	-	-	0	1	99846	NA	NA	NA	ENSDARG00000079823	567309	NA	NA	NA	NA	NA	ZDB-GENE-081104-343	si:dkey-190g11.7	1	2	2	1	1	2	12211	8	17127782	17132118
MAD_Dr_004_501227	ENSDART00000037515	3	0	gi|501227 ; gi|198083 ; gi|144431	1	1	-2	NA	NA	NA	ENSDARG00000024381	334306	NA	NA	NA	NA	misato homolog 1 (Drosophila)	ZDB-GENE-030131-6238	msto1	1	2	2	1	1	2	12211	19	776399	791207
MAD_Dr_004_501800	ENSDART00000080051	4	1	gi|501800 ; gi|170208 ; gi|155855 ; gi|155851	1	1	-2	NA	NA	NA	ENSDARG00000070601	-	NA	NA	NA	NA	NA	NA	NA	1	2	2	1	1	2	12211	11	21118119	21203266
MAD_Dr_004_501822	ENSDART00000081341	3	1	gi|501822 ; gi|161797 ; gi|161788	1	1	-2	NA	NA	NA	ENSDARG00000058470	100002318	NA	NA	NA	NA	im:7136778	ZDB-GENE-041111-17	mapk13	1	2	2	1	1	2	12211	8	10785364	10819337
MAD_Dr_004_504411	OTTDART00000034950	3	1	gi|504411 ; gi|191080 ; gi|191053	1	1	-2	NA	NA	NA	ENSDARG00000078567	8388607	NA	NA	NA	NA	NA	ZDB-GENE-081104-397	lonrf1l	1	2	2	1	1	2	12211	8	13662900	13750606
MAD_Dr_004_502841	ENSDART00000112597	5	0	gi|502841 ; gi|152064 ; gi|152062 ; gi|152061 ; gi|174518	1	1	-2	NA	NA	NA	ENSDARG00000075504	334026	NA	NA	NA	NA	NA	ZDB-GENE-030131-5958	si:dkey-40c23.2	1	2	2	1	1	2	12211	11	1558159	1580690
MAD_Dr_004_503839	OTTDART00000018860	3	1	gi|503839 ; gi|502221 ; gi|178204	1	1	-2	NA	NA	NA	ENSDARG00000092310	566074	NA	NA	NA	NA	NA	ZDB-GENE-060503-396	si:ch211-199g17.2	1	2	2	1	1	2	12211	19	43984189	44008335
MAD_Dr_004_503898	OTTDART00000021805	3	1	gi|503898 ; gi|191198 ; gi|190038	1	1	-2	NA	NA	NA	ENSDARG00000093350	-	NA	NA	NA	NA	NA	ZDB-GENE-060526-322	si:dkey-58f10.8	1	2	2	1	1	2	12211	5	38119987	38121190
MAD_Dr_004_504602	OTTDART00000040714	6	1	gi|504602 ; gi|501452 ; gi|146086 ; gi|145701 ; gi|142828 ; gi|142371	1	1	-2	NA	NA	NA	ENSDARG00000038686	553398	NA	NA	NA	NA	similar to LOC553398 protein; hypothetical protein LOC553398	NA	NA	1	2	2	1	1	2	12211	13	22567765	22584652
MAD_Dr_004_120329	ENSDART00000084425 ; NM_001122849.1	1	1	Dr.22830	0	1	120746	NM_001122849.1	NM_001122849	acyp1	ENSDARG00000060126	571263	acylphosphatase 1, erythrocyte (common) type	NA	NA	NA	zgc:163122	ZDB-GENE-050309-125	acyp1	1	2	2	1	1	2	12211	17	50165374	50168954
MAD_Dr_004_172743	ENSDART00000087216	2	1	XM_683903.3 ; ENSDART00000108602	0	1	58276	NA	NA	NA	ENSDARG00000061260	560497	NA	NA	NA	NA	NA	NA	NA	1	2	2	1	1	2	12211	11	34498635	34517629
MAD_Dr_004_144082	Dr.132794	1	0	OTTDART00000031138	0	1	16563	NA	NA	NA	ENSDARG00000057881	335380	NA	Dr.132794	si:dkey-33c12.3	si:dkey-33c12.3	si:dkey-33c12.3	ZDB-GENE-030131-7320	si:dkey-33c12.3	1	2	2	1	1	2	12211	13	8981754	8986868
MAD_Dr_004_145054	XM_001919739.1 ; Dr.118772	0	1		0	1	17827	XM_001919739.1	XM_001919739	NA	ENSDARG00000079664	565385	NA	Dr.118772	zgc:172341	zgc:172341	zgc:172341	ZDB-GENE-080204-116	zgc:172341	1	2	2	1	1	2	12211	17	6799466	6814716
MAD_Dr_004_152784	NM_213522.1	1	0	OTTDART00000039943	0	1	28261	NM_213522.1	NM_213522	zgc:55347	ENSDARG00000002184	406843	zgc:55347	NA	NA	NA	zgc:55347	ZDB-GENE-040426-2928	igbp1	1	2	1	3	3	3	12133	5	35930683	35938955
MAD_Dr_004_161862	OTTDART00000016992	0	-	-	0	1	42146	NA	NA	NA	ENSDARG00000018542	559818	NA	NA	NA	NA	NA	ZDB-GENE-060503-243	hapln4	1	2	1	3	2	3	12132	22	17803289	17806275
MAD_Dr_004_185540	ENSDART00000064805	1	1	OTTDART00000010609	0	1	78597	NA	NA	NA	ENSDARG00000044135	445161	NA	NA	NA	NA	centromere protein P	ZDB-GENE-040801-74	cenpp	1	2	1	3	2	3	12132	22	10411309	10484661
MAD_Dr_004_162586	OTTDART00000022730	0	-	-	0	1	43211	NA	NA	NA	ENSDARG00000095750	336459	NA	NA	NA	NA	NA	ZDB-GENE-030131-8403	si:dkey-71l1.3	1	2	1	3	1	3	12131	5	57055710	57069917
MAD_Dr_004_175501	OTTDART00000007797	0	-	-	0	1	62401	NA	NA	NA	ENSDARG00000042129	407714	NA	NA	NA	NA	NA	ZDB-GENE-040727-1	zp3a.1	1	2	1	3	1	3	12131	20	34088922	34090819
MAD_Dr_004_196711	OTTDART00000033307	0	-	-	0	1	97014	NA	NA	NA	ENSDARG00000091979	-	NA	NA	NA	NA	NA	ZDB-GENE-070912-435	si:dkey-20f20.4	1	2	1	3	1	3	12131	2	47579583	47612332
MAD_Dr_004_119340	OTTDART00000039386	2	0	OTTDART00000039379 ; ENSDART00000021950	0	1	119758	NA	NA	NA	ENSDARG00000055120	406645	NA	NA	NA	NA	NA	ZDB-GENE-040426-2650	ctsba	1	2	1	2	3	3	12123	17	32670420	32679003
MAD_Dr_004_103057	NM_001130649.1	1	0	ENSDART00000113638	0	1	103194	NM_001130649.1	NM_001130649	zgc:194186	ENSDARG00000078260	100170814	zgc:194186	NA	NA	NA	zgc:194186; zgc:194215	ZDB-GENE-080723-51	zgc:194186	1	2	1	2	2	2	12122	NA	NA	NA
MAD_Dr_004_147947	OTTDART00000045606	0	-	-	0	1	21698	NA	NA	NA	ENSDARG00000005561	558184	NA	NA	NA	NA	NA	ZDB-GENE-060201-3	gfm2	1	2	1	2	2	2	12122	5	33978326	34000557
MAD_Dr_004_141321	OTTDART00000027985	1	1	ENSDART00000074574	0	1	140852	NA	NA	NA	ENSDARG00000052668	559336	NA	NA	NA	NA	zgc:114200	ZDB-GENE-050913-96	zgc:114200	1	2	1	2	2	2	12122	NA	NA	NA
MAD_Dr_004_155649	OTTDART00000038101	1	1	ENSDART00000090356	0	1	33444	NA	NA	NA	ENSDARG00000091714	571426	NA	NA	NA	NA	fukutin related protein	ZDB-GENE-070412-4	fkrp	1	2	1	2	2	2	12122	NA	NA	NA
MAD_Dr_004_172718	OTTDART00000023481	0	-	-	0	1	58240	NA	NA	NA	ENSDARG00000052856	30082	NA	NA	NA	NA	KH domain containing, RNA binding, signal transduction associated 1a	ZDB-GENE-000210-25	khdrbs1a	1	2	1	2	2	2	12122	13	44873005	44885471
MAD_Dr_004_167215	NM_001114473.1	1	0	XM_678114.3	0	1	49833	NM_001114473.1	NM_001114473	zgc:172128	ENSDARG00000077683	100002012	zgc:172128	NA	NA	NA	zgc:172128	ZDB-GENE-080220-2	zgc:172128	1	2	1	2	2	2	12122	NA	NA	NA
MAD_Dr_004_171085	OTTDART00000037818	0	-	-	0	1	55633	NA	NA	NA	ENSDARG00000040559	393872	NA	NA	NA	NA	NA	ZDB-GENE-040426-1873	rad1	1	2	1	2	2	2	12122	15	23845232	23849335
MAD_Dr_004_172368	Dr.89004	2	0	NM_001089568.1 ; ENSDART00000060014	0	1	57704	NA	NA	NA	ENSDARG00000077172	100038788	NA	Dr.89004	zgc:162724	zgc:162724	zgc:162724; zgc:136895	ZDB-GENE-070424-72	ssuh2.4	1	2	1	2	2	2	12122	NA	NA	NA
MAD_Dr_004_177045	ENSDART00000112353 ; ENSDART00000114981	0	1		0	1	64712	NA	NA	NA	ENSDARG00000035391	550275	NA	NA	NA	NA	pentatricopeptide repeat domain 2	ZDB-GENE-050417-82	ptcd2	1	2	1	2	2	2	12122	5	34653304	34664364
MAD_Dr_004_177508	OTTDART00000004217	0	-	-	0	1	65402	NA	NA	NA	ENSDARG00000037040	692284	NA	NA	NA	NA	si:dkey-63j12.2	ZDB-GENE-040724-100	cgrrf1	1	2	1	2	2	2	12122	20	9789150	9793677
MAD_Dr_004_190146	ENSDART00000114527	0	-	-	0	1	88884	NA	NA	NA	ENSDARG00000075145	-	NA	NA	NA	NA	si:ch73-138e16.8	ZDB-GENE-070705-207	si:ch73-138e16.8	1	2	1	2	2	2	12122	NA	NA	NA
MAD_Dr_004_123072	OTTDART00000010308	1	1	XM_001921960.1	0	1	123543	NA	NA	NA	ENSDARG00000071637	-	NA	NA	NA	NA	NA	NA	NA	1	2	1	2	1	2	12121	NA	NA	NA
MAD_Dr_004_146372	OTTDART00000030357	3	0	Dr.10833 ; NM_001025456.1 ; ENSDART00000046678	0	1	19476	NA	NA	NA	ENSDARG00000018476	325034	NA	NA	NA	NA	p21 (CDKN1A)-activated kinase 2b	ZDB-GENE-030131-3759	pak2b	1	2	1	2	1	2	12121	22	2881007	2912890
MAD_Dr_004_159835	ENSDART00000011878	3	1	Dr.104803 ; NM_201510.1 ; OTTDART00000019442	0	1	39379	NA	NA	NA	ENSDARG00000003032	399484	NA	NA	NA	NA	eukaryotic translation initiation factor 4A, isoform 1B	ZDB-GENE-040120-6	eif4a1b	1	2	1	2	1	2	12121	5	23704613	23715544
MAD_Dr_004_156489	OTTDART00000038800	0	-	-	0	1	3458	NA	NA	NA	ENSDARG00000061345	564527	NA	NA	NA	NA	NA	ZDB-GENE-000607-82	wwp2	1	2	1	2	1	2	12121	25	34243167	34299071
MAD_Dr_004_184396	OTTDART00000015219	1	1	OTTDART00000015217	0	1	76801	NA	NA	NA	ENSDARG00000041429	327593	NA	NA	NA	NA	NA	ZDB-GENE-030131-5804	vwa9	1	2	1	2	1	2	12121	18	19005614	19016853
MAD_Dr_004_161715	NM_001008605.1 ; Dr.107428	0	1		0	1	41907	NM_001008605.1	NM_001008605	zgc:103508	ENSDARG00000039216	494062	zgc:103508	Dr.107428	zgc:103508	zgc:103508	zgc:103508	ZDB-GENE-030131-8835	wu:fk24h11	1	2	1	2	1	2	12121	NA	NA	NA
MAD_Dr_004_163984	NM_001020712.1 ; Dr.41565	1	1	OTTDART00000027917	0	1	45067	NM_001020712.1	NM_001020712	zgc:113090	ENSDARG00000053260	553741	zgc:113090	Dr.41565	zgc:113090	zgc:113090	zgc:113090	ZDB-GENE-050522-532	zgc:113090	1	2	1	2	1	2	12121	3	32738471	32741927
MAD_Dr_004_170553	ENSDART00000079194	1	1	OTTDART00000028432	0	1	54869	NA	NA	NA	ENSDARG00000056664	550342	NA	NA	NA	NA	ADP-ribosylation factor interacting protein 2b	ZDB-GENE-050417-131	arfip2b	1	2	1	2	1	2	12121	10	26244066	26263965
MAD_Dr_004_501555	ENSDART00000063484	4	1	gi|501555 ; gi|169669 ; gi|169656 ; gi|169463	1	1	-2	NA	NA	NA	ENSDARG00000043242	568321	NA	NA	NA	NA	NA	ZDB-GENE-050208-726	si:dkey-222f2.1	1	2	1	2	1	2	12121	22	5697907	5709514
MAD_Dr_004_177242	ENSDART00000063135	2	1	OTTDART00000035422 ; OTTDART00000035425	0	1	65008	NA	NA	NA	ENSDARG00000043003	450016	NA	NA	NA	NA	zgc:103434	ZDB-GENE-041010-132	pcyt2	1	2	1	2	1	2	12121	22	11566750	11585291
MAD_Dr_004_180574	OTTDART00000019753	1	1	ENSDART00000007057	0	1	70160	NA	NA	NA	ENSDARG00000007657	541325	NA	NA	NA	NA	NA	ZDB-GENE-050320-13	ccnh	1	2	1	2	1	2	12121	5	47312429	47323929
MAD_Dr_004_180698	ENSDART00000110104	0	-	-	0	1	70343	NA	NA	NA	ENSDARG00000076251	564854	NA	NA	NA	NA	NA	ZDB-GENE-071120-7	irf3	1	2	1	2	1	2	12121	12	4545360	4563225
MAD_Dr_004_189842	OTTDART00000024882	2	1	Dr.134121 ; OTTDART00000024883	0	1	88403	NA	NA	NA	ENSDARG00000038612	432386	NA	NA	NA	NA	hypothetical protein MGC35261-like (H. sapiens)	ZDB-GENE-040722-2	pih1d3	1	2	1	2	1	2	12121	2	44547772	44553127
MAD_Dr_004_192975	ENSDART00000111445	0	-	-	0	1	92824	NA	NA	NA	ENSDARG00000074211	563178	NA	NA	NA	NA	NA	ZDB-GENE-120215-229	si:dkeyp-72e1.7	1	2	1	2	1	2	12121	NA	NA	NA
MAD_Dr_004_126536	OTTDART00000038938	1	1	OTTDART00000038937	0	1	126596	NA	NA	NA	ENSDARG00000079753	567100	NA	NA	NA	NA	NA	ZDB-GENE-070615-4	zgc:162576	1	2	1	1	3	3	12113	17	42003253	42056379
MAD_Dr_004_191367	ENSDART00000060190	1	1	OTTDART00000028197	0	1	90517	NA	NA	NA	ENSDARG00000005959	-	NA	NA	NA	NA	enoyl Coenzyme A hydratase domain containing 1	ZDB-GENE-050522-370	echdc1	1	2	1	1	3	3	12113	NA	NA	NA
MAD_Dr_004_137740	OTTDART00000040549	2	1	OTTDART00000040550 ; ENSDART00000109619	0	1	137277	NA	NA	NA	ENSDARG00000091950	-	NA	NA	NA	NA	NA	ZDB-GENE-090313-388	si:dkeyp-4c7.3	1	2	1	1	2	2	12112	13	38100267	38152091
MAD_Dr_004_155173	ENSDART00000102275	2	0	Dr.106782 ; NM_001076579.1	0	1	31995	NA	NA	NA	ENSDARG00000076839	767638	NA	NA	NA	NA	zgc:153258	ZDB-GENE-060929-108	zgc:153258	1	2	1	1	2	2	12112	15	545650	555950
MAD_Dr_004_156877	OTTDART00000045498	0	-	-	0	1	35157	NA	NA	NA	ENSDARG00000019156	492797	NA	NA	NA	NA	NA	ZDB-GENE-041114-150	haus5	1	2	1	1	2	2	12112	8	20865764	20882744
MAD_Dr_004_158653	ENSDART00000015891 ; ENSDART00000110327 ; ENSDART00000112691	2	1	NM_200253.1 ; OTTDART00000025144	0	1	37747	NA	NA	NA	ENSDARG00000015254	-	NA	NA	NA	NA	NA	ZDB-GENE-040426-712	fzr1	1	2	1	1	2	2	12112	8	20830940	20844477
MAD_Dr_004_166992	NM_001103121.1 ; Dr.88550 ; ENSDART00000088077	1	1	XM_001918673.1	0	1	49506	NM_001103121.1	NM_001103121	zgc:158398	ENSDARG00000074226	568894	zgc:158398	Dr.88550	zgc:158398	zgc:158398	zgc:158398	ZDB-GENE-070820-3	zgc:158398	1	2	1	1	2	2	12112	25	3526013	3633663
MAD_Dr_004_168423	NM_001080035.1 ; Dr.84965 ; ENSDART00000085945	0	1		0	1	51583	NM_001080035.1	NM_001080035	zgc:158429	ENSDARG00000060748	567785	zgc:158429	Dr.84965	zgc:158429	zgc:158429	zgc:158429	ZDB-GENE-061215-17	tsfm	1	2	1	1	2	2	12112	6	39900007	39905895
MAD_Dr_004_171230	OTTDART00000026522	1	1	ENSDART00000079692	0	1	55924	NA	NA	NA	ENSDARG00000057096	799352	NA	NA	NA	NA	NA	ZDB-GENE-990415-256	ndr1	1	2	1	1	2	2	12112	21	20974150	20976449
MAD_Dr_004_173480	NM_001163923.1	0	-	-	0	1	59374	NM_001163923.1	NM_001163923	ccbe1	ENSDARG00000060022	555629	collagen and calcium binding EGF domains 1	NA	NA	NA	Collagen and calcium-binding EGF domain-containing protein 1	ZDB-GENE-090506-7	ccbe1	1	2	1	1	2	2	12112	NA	NA	NA
MAD_Dr_004_177886	NM_200347.1 ; Dr.18449	1	0	ENSDART00000082319	0	1	66059	NM_200347.1	NM_200347	zgc:63942	ENSDARG00000059247	393318	zgc:63942	Dr.18449	zgc:63942	zgc:63942	zgc:63942	ZDB-GENE-040426-1304	zgc:63942	1	2	1	1	2	2	12112	17	25307663	25323883
MAD_Dr_004_180214	OTTDART00000035251	1	1	Dr.116065	0	1	69631	NA	NA	NA	ENSDARG00000095539	-	NA	NA	NA	NA	NA	ZDB-GENE-081104-479	si:dkeyp-82a1.8	1	2	1	1	2	2	12112	8	20962348	20971363
MAD_Dr_004_100777	OTTDART00000028461	4	1	ENSDART00000015040 ; Dr.8916 ; NM_001020629.1 ; OTTDART00000028460	0	1	100870	NA	NA	NA	ENSDARG00000005651	553656	NA	NA	NA	NA	-Ha-ras Harvey rat sarcoma viral oncogene homolog, like	ZDB-GENE-050522-466	hrasb	1	2	1	1	1	2	12111	7	49365841	49378572
MAD_Dr_004_104539	OTTDART00000029941	1	1	Dr.119508	0	1	104687	NA	NA	NA	ENSDARG00000057529	557834	NA	NA	NA	NA	si:ch73-18j6.1	ZDB-GENE-070705-218	itpa	1	2	1	1	1	2	12111	20	15045284	15053463
MAD_Dr_004_115078	OTTDART00000001845	3	1	Dr.76389 ; NM_001077770.1 ; Dr.150295	0	1	115520	NA	NA	NA	ENSDARG00000079018	368863	NA	NA	NA	NA	FK506 binding protein 3	ZDB-GENE-030616-419	fkbp3	1	2	1	1	1	2	12111	NA	NA	NA
MAD_Dr_004_101931	OTTDART00000034814	0	-	-	0	1	102062	NA	NA	NA	ENSDARG00000092239	-	NA	NA	NA	NA	NA	ZDB-GENE-081104-388	si:dkey-242k1.4	1	2	1	1	1	2	12111	NA	NA	NA
MAD_Dr_004_106331	NM_001003549.2	1	1	Dr.85079	0	1	106546	NM_001003549.2	NM_001003549	zgc:100811	ENSDARG00000039872	445155	zgc:100811	NA	NA	NA	zgc:100811	ZDB-GENE-040801-63	lamtor2	1	2	1	1	1	2	12111	16	46718139	46724490
MAD_Dr_004_104842	OTTDART00000019806	0	-	-	0	1	104996	NA	NA	NA	ENSDARG00000092987	8388607	NA	NA	NA	NA	NA	ZDB-GENE-081104-333	zmat4a	1	2	1	1	1	2	12111	5	26983292	27147708
MAD_Dr_004_106215	XM_687404.3	0	-	-	0	1	10641	XM_687404.3	XM_687404	NA	ENSDARG00000090830	-	NA	NA	NA	NA	NA	NA	NA	1	2	1	1	1	2	12111	5	59845417	60013852
MAD_Dr_004_107047	OTTDART00000037703	3	0	NM_200680.1 ; OTTDART00000037702 ; Dr.81484	0	1	107235	NA	NA	NA	ENSDARG00000030608	393653	NA	NA	NA	NA	ras homolog gene family, member Ga	ZDB-GENE-040426-1504	rhogd	1	2	1	1	1	2	12111	14	11863965	11870355
MAD_Dr_004_185611	ENSDART00000052952	3	1	Dr.14852 ; NM_001080087.1 ; OTTDART00000018629	0	1	78686	NA	NA	NA	ENSDARG00000013863	-	NA	NA	NA	NA	si:ch211-287b5.3	ZDB-GENE-060503-229	fam133b	1	2	1	1	1	2	12111	19	40748151	40760823
MAD_Dr_004_108697	NM_001077722.1 ; Dr.133033	0	1		0	1	10895	NM_001077722.1	NM_001077722	zgc:152898	ENSDARG00000068381	777614	zgc:152898	Dr.133033	zgc:152898	zgc:152898	zgc:152898	ZDB-GENE-061103-202	tpcn2	1	2	1	1	1	2	12111	NA	NA	NA
MAD_Dr_004_175847	NM_001002623.1 ; Dr.84875 ; OTTDART00000029411 ; ENSDART00000025549	1	0	ENSDART00000105403	0	1	62913	NM_001002623.1	NM_001002623	zgc:92249	ENSDARG00000076563	436896	zgc:92249	Dr.84875	zgc:92249	zgc:92249	zgc:92249	ZDB-GENE-040718-368	zgc:92249	1	2	1	1	1	2	12111	14	46578599	46584472
MAD_Dr_004_154422	ENSDART00000053562	3	1	OTTDART00000038774 ; Dr.2613 ; NM_001077719.1	0	1	30956	NA	NA	NA	ENSDARG00000036888	777611	NA	NA	NA	NA	zgc:153935	ZDB-GENE-061103-148	zgc:153935	1	2	1	1	1	2	12111	25	27271730	27292561
MAD_Dr_004_154608	Dr.78425	0	-	-	0	1	31224	NA	NA	NA	ENSDARG00000086795	555382	NA	Dr.78425	NA	NA	NA	ZDB-GENE-110411-73	ttf2	1	2	1	1	1	2	12111	NA	NA	NA
MAD_Dr_004_124200	ENSDART00000101462 ; ENSDART00000109178	1	1	OTTDART00000018508	0	1	124712	NA	NA	NA	ENSDARG00000069624	-	NA	NA	NA	NA	NA	ZDB-GENE-060503-609	mrps18c	1	2	1	1	1	2	12111	21	19292211	19293697
MAD_Dr_004_116436	ENSDART00000097857	1	1	OTTDART00000032517	0	1	116950	NA	NA	NA	ENSDARG00000067908	751751	NA	NA	NA	NA	zgc:153383	ZDB-GENE-060825-178	zgc:153383	1	2	1	1	1	2	12111	NA	NA	NA
MAD_Dr_004_114612	ENSDART00000026195 ; NM_001098256.2 ; Dr.80699	0	1		0	1	11506	NM_001098256.2	NM_001098256	slc9a6a	ENSDARG00000009209	792983	solute carrier family 9 (sodium/hydrogen exchanger	Dr.80699	slc9a6a	solute carrier family 9 (sodium/hydrogen exchanger	solute carrier family 9 (sodium/hydrogen exchanger	ZDB-GENE-070424-104	slc9a6a	1	2	1	1	1	2	12111	14	31278668	31302813
MAD_Dr_004_114928	OTTDART00000011415 ; OTTDART00000015340 ; OTTDART00000011418	36	0	OTTDART00000011416 ; ENSDART00000115332 ; ENSDART00000113896 ; ENSDART00000112514 ; ENSDART00000111311 ; ENSDART00000097502 ; ENSDART00000100879 ; Dr.151544 ; Dr.135135 ; XM_001923436.1 ; Dr.78774 ; XM_001923439.1 ; Dr.149550 ; XM_001923438.1 ; Dr.152595 ; Dr.141406 ; XM_702459.3 ; XM_001922517.1 ; XM_001923567.1 ; XM_001922990.1 ; Dr.153956 ; XM_001923532.1 ; XM_001922988.1 ; OTTDART00000015327 …	0	1	115364	NA	NA	NA	ENSDARG00000087830	-	NA	NA	NA	NA	NA	ZDB-GENE-050419-2	si:ch211-223o1.2	1	2	1	1	1	2	12111	18	18744081	18745293
MAD_Dr_004_116252	OTTDART00000023759	1	1	ENSDART00000081663	0	1	116665	NA	NA	NA	ENSDARG00000058734	541344	NA	NA	NA	NA	NA	ZDB-GENE-050320-35	prdx1	1	2	1	1	1	2	12111	2	6194609	6203806
MAD_Dr_004_118622	OTTDART00000038597	3	0	XM_001331137.1 ; NM_001024402.1 ; OTTDART00000024102	0	1	119113	NA	NA	NA	ENSDARG00000057055	554100	NA	NA	NA	NA	hypothetical LOC791908; zgc:109991	ZDB-GENE-050522-131	ndufs8b	1	2	1	1	1	2	12111	14	21373862	21381672
MAD_Dr_004_119764	OTTDART00000038808	2	0	Dr.120885 ; NM_173281.2	0	1	120156	NA	NA	NA	ENSDARG00000070280	8388607	NA	NA	NA	NA	NA	NA	NA	1	2	1	1	1	2	12111	25	35798682	35799293
MAD_Dr_004_169226	NM_001037371.1	2	1	OTTDART00000038882 ; ENSDART00000054681	0	1	52744	NM_001037371.1	NM_001037371	zgc:123113	ENSDARG00000037551	553216	zgc:123113	NA	NA	NA	zgc:123113	ZDB-GENE-051120-102	pm20d1.1	1	2	1	1	1	2	12111	23	18094585	18104060
MAD_Dr_004_120194	OTTDART00000041432	1	1	Dr.43460	0	1	120611	NA	NA	NA	ENSDARG00000079632	571834	NA	NA	NA	NA	NA	ZDB-GENE-050506-118	si:dkey-28b4.7	1	2	1	1	1	2	12111	1	44005751	44009634
MAD_Dr_004_153944	NM_200658.1 ; OTTDART00000036425	0	1		0	1	30314	NM_200658.1	NM_200658	ccdc43	ENSDARG00000054446	393631	coiled-coil domain containing 43	NA	NA	NA	coiled-coil domain containing 43	ZDB-GENE-040426-1587	ccdc43	1	2	1	1	1	2	12111	3	31468879	31473617
MAD_Dr_004_122474	OTTDART00000015328	38	0	OTTDART00000011416 ; OTTDART00000011418 ; ENSDART00000115332 ; ENSDART00000113896 ; ENSDART00000112514 ; ENSDART00000111311 ; ENSDART00000097502 ; ENSDART00000100879 ; Dr.151544 ; Dr.135135 ; XM_001923436.1 ; Dr.78774 ; XM_001923439.1 ; Dr.149550 ; XM_001923438.1 ; Dr.152595 ; Dr.141406 ; XM_702459.3 ; XM_001922517.1 ; XM_001923567.1 ; XM_001922990.1 ; Dr.153956 ; XM_001923532.1 ; OTTDART00000015…	0	1	122964	NA	NA	NA	ENSDARG00000095679	-	NA	NA	NA	NA	NA	ZDB-GENE-050419-104	si:dkey-73n10.10	1	2	1	1	1	2	12111	18	18780616	18781828
MAD_Dr_004_123523	OTTDART00000028363	0	-	-	0	1	12402	NA	NA	NA	ENSDARG00000024299	550397	NA	NA	NA	NA	C1q and tumor necrosis factor related protein 4	ZDB-GENE-050417-198	c1qtnf4	1	2	1	1	1	2	12111	7	38328892	38340983
MAD_Dr_004_175990	OTTDART00000023794	1	0	OTTDART00000023797	0	1	63151	NA	NA	NA	ENSDARG00000093003	791456	NA	NA	NA	NA	aspartoacylase (aminocyclase) 3.1	ZDB-GENE-040718-345	acy3.1	1	2	1	1	1	2	12111	1	51864674	51870541
MAD_Dr_004_124099	XM_001920155.1 ; ENSDART00000109577	0	1		0	1	124614	XM_001920155.1	XM_001920155	NA	ENSDARG00000078272	-	NA	NA	NA	NA	NA	NA	NA	1	2	1	1	1	2	12111	5	11002277	11009863
MAD_Dr_004_124761	Dr.108686 ; OTTDART00000001381	0	1		0	2	125224	NA	NA	NA	ENSDARG00000095368	368422	NA	Dr.108686	si:rp71-20i5.5	si:rp71-20i5.5	si:rp71-20i5.5	ZDB-GENE-030616-59	si:rp71-20i5.5	1	2	1	1	1	2	12111	9	34261811	34273982
MAD_Dr_004_125267	NM_200761.1	1	0	Dr.124252	0	1	125500	NM_200761.1	NM_200761	dnajc19	ENSDARG00000044420	393734	DnaJ (Hsp40) homolog, subfamily C, member 19	NA	NA	NA	DnaJ (Hsp40) homolog, subfamily C, member 19	ZDB-GENE-040426-1730	dnajc19	1	2	1	1	1	2	12111	22	37599176	37606102
MAD_Dr_004_171632	OTTDART00000019805 ; NM_205585.1 ; Dr.105557 ; ENSDART00000051491	0	1		0	1	56563	NM_205585.1	NM_205585	sfrp1a	ENSDARG00000035521	402843	secreted frizzled-related protein 1a	Dr.105557	sfrp1a	secreted frizzled-related protein 1a	secreted frizzled-related protein 1a	ZDB-GENE-040310-5	sfrp1a	1	2	1	1	1	2	12111	5	26888822	26938592
MAD_Dr_004_142608	OTTDART00000027096	0	-	-	0	1	14626	NA	NA	NA	ENSDARG00000039966	322857	NA	NA	NA	NA	NA	ZDB-GENE-030131-1577	prom1a	1	2	1	1	1	2	12111	14	47469010	47629494
MAD_Dr_004_154781	NM_199479.2 ; OTTDART00000026422	0	1		0	1	31460	NM_199479.2	NM_199479	lrrfip2	ENSDARG00000010400	335838	leucine rich repeat (in FLII) interacting protein	NA	NA	NA	leucine rich repeat (in FLII) interacting protein	ZDB-GENE-030131-7781	lrrfip2	1	2	1	1	1	2	12111	13	42495145	42547945
MAD_Dr_004_127857	ENSDART00000099040	2	1	Dr.107078 ; NM_001130592.1	0	1	12785	NA	NA	NA	ENSDARG00000003820	402815	NA	NA	NA	NA	nuclear receptor subfamily 1, group D, member 2a	ZDB-GENE-040504-1	nr1d2a	1	2	1	1	1	2	12111	16	49879775	49907024
MAD_Dr_004_128735	OTTDART00000038881	0	-	-	0	1	128679	NA	NA	NA	ENSDARG00000062096	768158	NA	NA	NA	NA	zgc:154035	ZDB-GENE-061013-637	pm20d1.2	1	2	1	1	1	2	12111	23	18067448	18091603
MAD_Dr_004_131650	ENSDART00000067320	1	1	Dr.132650	0	1	131319	NA	NA	NA	ENSDARG00000045797	100190888	NA	NA	NA	NA	hypothetical protein LOC100190888	ZDB-GENE-100427-3	si:ch211-68a17.7	1	2	1	1	1	2	12111	25	18853603	18855371
MAD_Dr_004_182659	OTTDART00000042164	1	0	Dr.82149	0	1	7411	NA	NA	NA	ENSDARG00000019774	386659	NA	NA	NA	NA	zinc fingers and homeoboxes 3	ZDB-GENE-031107-1	zhx3	1	2	1	1	1	2	12111	23	2929159	2957326
MAD_Dr_004_134072	NM_001003434.1	1	1	Dr.105500	0	1	133664	NM_001003434.1	NM_001003434	zgc:92868	ENSDARG00000077717	445040	zgc:92868	NA	NA	NA	zgc:92868	ZDB-GENE-040801-167	zgc:92868	1	2	1	1	1	2	12111	11	1369713	1374076
MAD_Dr_004_142561	ENSDART00000114203	1	1	XM_001337483.2	0	1	14567	NA	NA	NA	ENSDARG00000079463	100003570	NA	NA	NA	NA	similar to mannosidase, alpha, class 2B, member 2	ZDB-GENE-140106-166	man2b2	1	2	1	1	1	2	12111	7	19257945	19274771
MAD_Dr_004_141208	OTTDART00000023691	3	1	Dr.75369 ; NM_199617.1 ; ENSDART00000113105	0	1	140749	NA	NA	NA	ENSDARG00000089260	322715	NA	NA	NA	NA	NA	ZDB-GENE-030131-1435	dus1l	1	2	1	1	1	2	12111	3	36093201	36103055
MAD_Dr_004_142010	OTTDART00000043291	1	1	ENSDART00000051112	0	1	141494	NA	NA	NA	ENSDARG00000076077	553576	NA	NA	NA	NA	NA	ZDB-GENE-050522-115	ovca2	1	2	1	1	1	2	12111	NA	NA	NA
MAD_Dr_004_142516	NM_001030236.1	0	-	-	0	1	14512	NM_001030236.1	NM_001030236	zgc:112352	ENSDARG00000028513	569563	zgc:112352	NA	NA	NA	zgc:112352	ZDB-GENE-050706-137	coro7	1	2	1	1	1	2	12111	NA	NA	NA
MAD_Dr_004_143938	ENSDART00000082228	3	0	OTTDART00000043352 ; Dr.33796 ; NM_001029949.1	0	1	16358	NA	NA	NA	ENSDARG00000032188	327642	NA	NA	NA	NA	leucine rich repeat containing 8 family, member A; similar to leucine rich repeat containing 8 family, member A	ZDB-GENE-030131-5853	lrrc8a	1	2	1	1	1	2	12111	21	4091726	4140380
MAD_Dr_004_143997	NM_131822.1 ; Dr.76633	2	1	ENSDART00000051553 ; OTTDART00000020277	0	1	16447	NM_131822.1	NM_131822	znf703	ENSDARG00000035563	114429	zinc finger protein 703	Dr.76633	znf703	zinc finger protein 703	zinc finger protein 703	ZDB-GENE-010717-1	znf703	1	2	1	1	1	2	12111	5	23826183	23829884
MAD_Dr_004_144387	OTTDART00000017538	0	-	-	0	1	16940	NA	NA	NA	ENSDARG00000016623	768159	NA	NA	NA	NA	NA	ZDB-GENE-030131-7626	si:ch211-195b13.1	1	2	1	1	1	2	12111	19	25288110	25305061
MAD_Dr_004_144646	OTTDART00000022720	0	-	-	0	1	17296	NA	NA	NA	ENSDARG00000004774	321745	NA	NA	NA	NA	NA	ZDB-GENE-030131-464	wdr36	1	2	1	1	1	2	12111	5	55196552	55244051
MAD_Dr_004_145491	ENSDART00000040534	1	1	XM_694005.3	0	1	18368	NA	NA	NA	ENSDARG00000009610	570516	NA	NA	NA	NA	wu:fc13d03	ZDB-GENE-030131-2614	rgs12a	1	2	1	1	1	2	12111	7	18222492	18295151
MAD_Dr_004_189092	ENSDART00000057039	1	1	OTTDART00000029943	0	1	87067	NA	NA	NA	ENSDARG00000075732	100330070	NA	NA	NA	NA	NA	ZDB-GENE-070424-105	taf4b	1	2	1	1	1	2	12111	20	18360830	18396654
MAD_Dr_004_145940	OTTDART00000012930 ; ENSDART00000023763	0	1		0	1	18931	NA	NA	NA	ENSDARG00000016528	541407	NA	NA	NA	NA	zgc:103511	ZDB-GENE-050320-107	zgc:103511	1	2	1	1	1	2	12111	20	44600031	44613102
MAD_Dr_004_147670	ENSDART00000019936	3	1	OTTDART00000041132 ; Dr.76750 ; NM_001003470.1	0	1	21314	NA	NA	NA	ENSDARG00000016809	445076	NA	NA	NA	NA	zgc:91856	ZDB-GENE-040801-208	prkacab	1	2	1	1	1	2	12111	1	55165901	55195527
MAD_Dr_004_150975	ENSDART00000008711	4	1	XM_697378.3 ; Dr.26674 ; NM_201180.1 ; OTTDART00000027370	0	1	25792	NA	NA	NA	ENSDARG00000016875	394155	NA	NA	NA	NA	hypothetical LOC554439; glycogen synthase 1 (muscle)	ZDB-GENE-040426-1243	gys1	1	2	1	1	1	2	12111	3	16572214	16597522
MAD_Dr_004_147470	NM_200964.1 ; Dr.77523	2	0	ENSDART00000022060 ; OTTDART00000006631	0	1	20964	NM_200964.1	NM_200964	atf3	ENSDARG00000007823	393939	activating transcription factor 3	Dr.77523	atf3	activating transcription factor 3	activating transcription factor 3	ZDB-GENE-040426-728	atf3	1	2	1	1	1	2	12111	20	37891754	37897858
MAD_Dr_004_147837	ENSDART00000088677	3	1	OTTDART00000020012 ; Dr.106354 ; XM_681654.3	0	1	21540	NA	NA	NA	ENSDARG00000061845	-	NA	NA	NA	NA	si:dkeyp-110e4.6	ZDB-GENE-030219-75	si:dkeyp-110e4.6	1	2	1	1	1	2	12111	14	26128889	26139062
MAD_Dr_004_148778	NM_001020755.1	1	1	OTTDART00000038926	0	1	22843	NM_001020755.1	NM_001020755	zgc:110708	ENSDARG00000057426	553793	zgc:110708	NA	NA	NA	zgc:110708	ZDB-GENE-050522-480	oard1	1	2	1	1	1	2	12111	23	19294038	19299366
MAD_Dr_004_149066	NM_001079982.1 ; Dr.75501	0	1		0	1	23213	NM_001079982.1	NM_001079982	aggf1	ENSDARG00000060109	559905	angiogenic factor with G patch and FHA domains 1	Dr.75501	aggf1	angiogenic factor with G patch and FHA domains 1	angiogenic factor with G patch and FHA domains 1	ZDB-GENE-060929-836	aggf1	1	2	1	1	1	2	12111	21	8004117	8031230
MAD_Dr_004_155246	OTTDART00000009155	0	-	-	0	1	3255	NA	NA	NA	ENSDARG00000011582	567413	NA	NA	NA	NA	SRY-box containing gene 5	ZDB-GENE-000607-13	sox5	1	2	1	1	1	2	12111	4	16992394	17085808
MAD_Dr_004_151349	ENSDART00000074683 ; OTTDART00000023848	2	1	Dr.113670 ; XM_689590.3	0	1	26283	NA	NA	NA	ENSDARG00000052766	566318	NA	NA	NA	NA	hypothetical LOC566318	NA	NA	1	2	1	1	1	2	12111	1	44516314	44569954
MAD_Dr_004_151518	OTTDART00000036472 ; NM_001159912.1 ; Dr.75482	0	1		0	1	26502	NM_001159912.1	NM_001159912	lnpb	ENSDARG00000006639	337509	limb and neural patterns b	Dr.75482	lnpb	limb and neural patterns b	limb and neural patterns b	ZDB-GENE-030131-9455	lnpb	1	2	1	1	1	2	12111	6	10566887	10628224
MAD_Dr_004_152032	ENSDART00000085786	2	1	Dr.78181 ; NM_001081749.1	0	1	27176	NA	NA	NA	ENSDARG00000060695	560756	NA	NA	NA	NA	zgc:158750	ZDB-GENE-070209-152	znf346	1	2	1	1	1	2	12111	21	37405593	37423314
MAD_Dr_004_151768	OTTDART00000013002	1	1	OTTDART00000013004	0	1	26826	NA	NA	NA	ENSDARG00000043004	572032	NA	NA	NA	NA	NA	ZDB-GENE-030804-4	si:dkeyp-117h8.4	1	2	1	1	1	2	12111	20	25740380	25746060
MAD_Dr_004_151949	ENSDART00000077670	3	1	Dr.76251 ; XM_689284.3 ; OTTDART00000017189	0	1	27065	NA	NA	NA	ENSDARG00000032218	566019	NA	NA	NA	NA	acyl-CoA synthetase short-chain family member 3	ZDB-GENE-060503-816	acss3	1	2	1	1	1	2	12111	4	22146180	22257094
MAD_Dr_004_152431	NM_200379.1 ; Dr.88906	0	1		0	1	27758	NM_200379.1	NM_200379	zgc:64119	ENSDARG00000043260	393350	zgc:64119	Dr.88906	zgc:64119	zgc:64119	zgc:64119	ZDB-GENE-040426-1373	xylb	1	2	1	1	1	2	12111	24	41370410	41403848
MAD_Dr_004_153140	OTTDART00000038840 ; ENSDART00000083947	2	1	Dr.87599 ; NM_001076672.1	0	1	28806	NA	NA	NA	ENSDARG00000059956	767734	NA	NA	NA	NA	PTK6 protein tyrosine kinase 6b	ZDB-GENE-060929-1150	ptk6b	1	2	1	1	1	2	12111	23	17460982	17477668
MAD_Dr_004_154324	ENSDART00000003428	3	0	NM_213533.1 ; OTTDART00000023230 ; Dr.75874	0	1	30781	NA	NA	NA	ENSDARG00000015524	140620	NA	NA	NA	NA	phosphoribosyl pyrophosphate synthetase 1A	ZDB-GENE-011212-5	prps1a	1	2	1	1	1	2	12111	5	22632744	22643860
MAD_Dr_004_154295	NM_001077255.1 ; Dr.79902	3	0	ENSDART00000092953 ; OTTDART00000029084 ; OTTDART00000030122	0	1	30742	NM_001077255.1	NM_001077255	cnot7	ENSDARG00000032116	768119	CCR4-NOT transcription complex, subunit 7	Dr.79902	cnot7	CCR4-NOT transcription complex, subunit 7	zgc:153168	ZDB-GENE-061013-29	cnot7	1	2	1	1	1	2	12111	14	30073444	30084540
MAD_Dr_004_154562	ENSDART00000017309	2	0	Dr.76674 ; XM_001919020.1	0	1	31164	NA	NA	NA	ENSDARG00000060123	-	NA	NA	NA	NA	NA	ZDB-GENE-080818-1	ca16b	1	2	1	1	1	2	12111	6	45944292	46160703
MAD_Dr_004_155951	NM_200885.1	6	0	ENSDART00000104680 ; OTTDART00000026982 ; ENSDART00000005366 ; OTTDART00000026981 ; Dr.4186 ; NM_199582.1	0	1	33853	NM_200885.1	NM_200885	tpd52l2b	ENSDARG00000013655	322103	tumor protein D52-like 2b	NA	NA	NA	tumor protein D52-like 2b	ZDB-GENE-030131-822	tpd52l2b	1	2	1	1	1	2	12111	23	17505002	17524468
MAD_Dr_004_154863	NM_001017631.1 ; Dr.92604	2	1	ENSDART00000054620 ; OTTDART00000026229	0	1	31574	NM_001017631.1	NM_001017631	kctd12b	ENSDARG00000037507	550324	potassium channel tetramerisation domain containin	Dr.92604	kctd12b	potassium channel tetramerisation domain containin	potassium channel tetramerisation domain containing 12b	ZDB-GENE-050417-104	kctd12b	1	2	1	1	1	2	12111	14	11803521	11823116
MAD_Dr_004_155516	OTTDART00000038863 ; ENSDART00000012540	0	1		0	1	33248	NA	NA	NA	ENSDARG00000008541	337333	NA	NA	NA	NA	zgc:63792	ZDB-GENE-030131-9279	chia.4	1	2	1	1	1	2	12111	23	17999936	18006800
MAD_Dr_004_155669	NM_213027.1 ; Dr.33055	1	0	XM_697504.3	0	1	33465	NM_213027.1	NM_213027	zgc:73185	ENSDARG00000077876	406300	zgc:73185	Dr.33055	zgc:73185	zgc:73185	zgc:73185	NA	NA	1	2	1	1	1	2	12111	NA	NA	NA
MAD_Dr_004_192994	Dr.79506	0	-	-	0	1	92846	NA	NA	NA	ENSDARG00000060687	569795	NA	Dr.79506	NA	NA	chromodomain helicase DNA binding protein 2	ZDB-GENE-050419-256	chd2	1	2	1	1	1	2	12111	18	24946933	25003048
MAD_Dr_004_155962	OTTDART00000024645	0	-	-	0	1	33864	NA	NA	NA	ENSDARG00000014083	321614	NA	NA	NA	NA	WD repeat domain containing 82	ZDB-GENE-030131-333	wdr82	1	2	1	1	1	2	12111	6	41455443	41463854
MAD_Dr_004_156319	NM_001110376.1 ; Dr.117379	1	0	XM_001922070.1	0	1	34354	NM_001110376.1	NM_001110376	zgc:171664	ENSDARG00000077844	556800	zgc:171664	Dr.117379	zgc:171664	zgc:171664	zgc:171664	ZDB-GENE-080204-33	chst3b	1	2	1	1	1	2	12111	NA	NA	NA
MAD_Dr_004_182987	OTTDART00000037156 ; OTTDART00000037157	1	1	OTTDART00000037154	0	1	74631	NA	NA	NA	ENSDARG00000052244	553264	NA	NA	NA	NA	zgc:158564	ZDB-GENE-070112-1662	zgc:158564	1	2	1	1	1	2	12111	7	39393038	39404655
MAD_Dr_004_157787	NM_194373.1	3	0	Dr.78712 ; OTTDART00000024112 ; ENSDART00000066053	0	1	36431	NM_194373.1	NM_194373	cbx2	ENSDARG00000044938	327291	chromobox homolog 2 (Drosophila Pc class)	NA	NA	NA	chromobox homolog 2 (Drosophila Pc class)	ZDB-GENE-030131-5502	cbx2	1	2	1	1	1	2	12111	3	10182781	10195448
MAD_Dr_004_156912	OTTDART00000011112	0	-	-	0	1	35215	NA	NA	NA	ENSDARG00000040081	327616	NA	NA	NA	NA	NA	ZDB-GENE-030131-5827	zgc:66432	1	2	1	1	1	2	12111	16	42107966	42116585
MAD_Dr_004_157153	OTTDART00000045037	1	1	XR_044972.1	0	1	3552	NA	NA	NA	ENSDARG00000075490	-	NA	NA	NA	NA	NA	NA	NA	1	2	1	1	1	2	12111	NA	NA	NA
MAD_Dr_004_157198	OTTDART00000037111	3	0	ENSDART00000085505 ; Dr.36861 ; NM_001089326.1	0	1	35571	NA	NA	NA	ENSDARG00000060586	323089	NA	NA	NA	NA	zgc:162265	ZDB-GENE-030131-1809	ctdspl2b	1	2	1	1	1	2	12111	7	31103233	31122429
MAD_Dr_004_157286	ENSDART00000082697	1	1	OTTDART00000028945	0	1	35670	NA	NA	NA	ENSDARG00000075058	393704	NA	NA	NA	NA	gamma-aminobutyric acid (GABA) A receptor, alpha 6	ZDB-GENE-040426-1692	gabra6a	1	2	1	1	1	2	12111	14	21854815	21871541
MAD_Dr_004_157328	XM_001340162.2	0	-	-	0	1	35739	XM_001340162.2	XM_001340162	NA	ENSDARG00000086722	-	NA	NA	NA	NA	NA	NA	NA	1	2	1	1	1	2	12111	NA	NA	NA
MAD_Dr_004_162474	NM_201079.1	2	1	OTTDART00000025896 ; OTTDART00000025895	0	1	43058	NM_201079.1	NM_201079	fbxo9	ENSDARG00000011055	325469	F-box protein 9	NA	NA	NA	F-box protein 9	ZDB-GENE-030131-4194	fbxo9	1	2	1	1	1	2	12111	13	2213376	2227032
MAD_Dr_004_501341	ENSDART00000050687	2	0	gi|501341 ; gi|157856	1	1	-2	NA	NA	NA	ENSDARG00000035028	327566	NA	NA	NA	NA	zgc:77292	ZDB-GENE-030131-5777	lpcat4	1	2	1	1	1	2	12111	7	1337849	1359886
MAD_Dr_004_157946	ENSDART00000044328	1	1	NM_001080656.3	0	1	36653	NA	NA	NA	ENSDARG00000044142	541435	NA	NA	NA	NA	acyl-CoA synthetase short-chain family member 1	ZDB-GENE-050320-139	acss1	1	2	1	1	1	2	12111	17	25815556	25835531
MAD_Dr_004_158296	ENSDART00000110103	0	-	-	0	1	3720	NA	NA	NA	ENSDARG00000076189	100330741	NA	NA	NA	NA	zgc:175202	ZDB-GENE-080303-31	ccdc88b	1	2	1	1	1	2	12111	14	46715229	46785214
MAD_Dr_004_158344	NM_213120.1 ; Dr.77513 ; ENSDART00000038745	0	1		0	1	37279	NM_213120.1	NM_213120	yy1b	ENSDARG00000027978	406394	YY1 transcription factor b	Dr.77513	yy1b	YY1 transcription factor b	YY1 transcription factor b	ZDB-GENE-040426-2127	yy1b	1	2	1	1	1	2	12111	20	54633023	54646040
MAD_Dr_004_178756	OTTDART00000044149	0	-	-	0	1	67470	NA	NA	NA	ENSDARG00000014966	327538	NA	NA	NA	NA	zgc:66477	ZDB-GENE-030131-5749	ccdc82	1	2	1	1	1	2	12111	21	40662848	40686192
MAD_Dr_004_197256	ENSDART00000078171	3	1	Dr.108585 ; XM_683329.3 ; OTTDART00000038185	0	1	97571	NA	NA	NA	ENSDARG00000028322	-	NA	NA	NA	NA	peroxisomal biogenesis factor 14	ZDB-GENE-060130-169	pex14	1	2	1	1	1	2	12111	23	28882374	28999216
MAD_Dr_004_159289	OTTDART00000024254	0	-	-	0	1	38634	NA	NA	NA	ENSDARG00000002167	436925	NA	NA	NA	NA	NA	ZDB-GENE-040718-399	cacnb1	1	2	1	1	1	2	12111	3	16007320	16077883
MAD_Dr_004_159940	Dr.79630	0	-	-	0	1	39530	NA	NA	NA	ENSDARG00000033548	100002175	NA	Dr.79630	nkiras1	NFKB inhibitor interacting Ras-like 1	NFKB inhibitor interacting Ras-like 1	ZDB-GENE-040718-215	nkiras1	1	2	1	1	1	2	12111	NA	NA	NA
MAD_Dr_004_160268	ENSDART00000079385	1	1	OTTDART00000036098	0	1	39979	NA	NA	NA	ENSDARG00000056830	-	NA	NA	NA	NA	NA	NA	NA	1	2	1	1	1	2	12111	14	22184889	22198375
MAD_Dr_004_160651	NM_201140.1	1	1	OTTDART00000028849	0	1	40485	NM_201140.1	NM_201140	zgc:63485	ENSDARG00000008727	394115	zgc:63485	NA	NA	NA	zgc:63485	ZDB-GENE-040426-1132	ranbp3a	1	2	1	1	1	2	12111	11	6298115	6319463
MAD_Dr_004_162643	OTTDART00000020019 ; ENSDART00000054183	2	1	Dr.79556 ; NM_001002691.1	0	1	43288	NA	NA	NA	ENSDARG00000037244	436964	NA	NA	NA	NA	G protein-coupled receptor 137bb	ZDB-GENE-040718-443	gpr137	1	2	1	1	1	2	12111	14	26141122	26152596
MAD_Dr_004_501311	ENSDART00000046562	5	1	gi|501311 ; gi|188807 ; gi|188657 ; gi|188656 ; gi|161606	1	1	-2	NA	NA	NA	ENSDARG00000002840	562640	NA	NA	NA	NA	NA	ZDB-GENE-090501-2	si:dkey-28b4.8	1	2	1	1	1	2	12111	1	43950424	44002958
MAD_Dr_004_164499	ENSDART00000041451	3	1	OTTDART00000005162 ; NM_001001836.1 ; Dr.4192	0	1	45815	NA	NA	NA	ENSDARG00000030976	415096	NA	NA	NA	NA	si:ch211-20b12.1	ZDB-GENE-040520-1	vipas39	1	2	1	1	1	2	12111	NA	NA	NA
MAD_Dr_004_163913	Dr.94994	3	0	OTTDART00000006655 ; NM_201165.2 ; ENSDART00000044665	0	1	44988	NA	NA	NA	ENSDARG00000032431	394140	NA	Dr.94994	mpv17	MpV17 transgene, murine homolog, glomerulosclerosi	MpV17 transgene, murine homolog, glomerulosclerosis	ZDB-GENE-040426-1168	mpv17	1	2	1	1	1	2	12111	20	38769015	38813650
MAD_Dr_004_166240	ENSDART00000090183	2	1	Dr.80556 ; NM_001077298.1	0	1	48421	NA	NA	NA	ENSDARG00000062374	768155	NA	NA	NA	NA	zgc:154073	ZDB-GENE-061013-607	leng9	1	2	1	1	1	2	12111	16	13916149	13927951
MAD_Dr_004_165075	ENSDART00000076386	2	0	Dr.43419 ; NM_001037422.1	0	1	46709	NA	NA	NA	ENSDARG00000054222	641481	NA	NA	NA	NA	F-box and leucine-rich repeat protein 8	ZDB-GENE-051120-81	fbxl8	1	2	1	1	1	2	12111	7	28839531	28844631
MAD_Dr_004_164782	OTTDART00000026453	3	1	ENSDART00000006373 ; Dr.1866 ; NM_199666.1	0	1	46213	NA	NA	NA	ENSDARG00000013979	324047	NA	NA	NA	NA	Nedd4 family interacting protein 1	ZDB-GENE-030131-2767	ndfip1	1	2	1	1	1	2	12111	14	23419889	23429523
MAD_Dr_004_164948	Dr.79100	2	0	ENSDART00000019991 ; NM_001007344.1	0	1	46482	NA	NA	NA	ENSDARG00000010596	492472	NA	Dr.79100	slc7a6os	solute carrier family 7, member 6 opposite strand	solute carrier family 7, member 6 opposite strand	ZDB-GENE-041114-32	slc7a6os	1	2	1	1	1	2	12111	7	28341478	28352097
MAD_Dr_004_165494	ENSDART00000109505	1	1	Dr.151050	0	1	47336	NA	NA	NA	ENSDARG00000076861	100330782	NA	NA	NA	NA	NA	ZDB-GENE-120807-1	tmem79b	1	2	1	1	1	2	12111	16	30396152	30404580
MAD_Dr_004_165588	NM_212691.1 ; Dr.1778	2	1	ENSDART00000020810 ; OTTDART00000026960	0	1	47475	NM_212691.1	NM_212691	sdcbp	ENSDARG00000012513	325004	syndecan binding protein (syntenin)	Dr.1778	sdcbp	syndecan binding protein (syntenin)	syndecan binding protein (syntenin)	ZDB-GENE-030131-3727	sdcbp2	1	2	1	1	1	2	12111	23	16722278	16755843
MAD_Dr_004_166036	Dr.86026	1	1	ENSDART00000058685	0	1	4812	NA	NA	NA	ENSDARG00000040123	568996	NA	Dr.86026	zfpm2a	zinc finger protein, multitype 2a	zinc finger protein, multitype 2a	ZDB-GENE-060130-4	zfpm2a	1	2	1	1	1	2	12111	16	43871448	44179878
MAD_Dr_004_166101	OTTDART00000040078	2	1	Dr.79562 ; NM_001079972.1	0	1	48226	NA	NA	NA	ENSDARG00000070907	558560	NA	NA	NA	NA	zgc:158268	ZDB-GENE-061201-6	lcor	1	2	1	1	1	2	12111	NA	NA	NA
MAD_Dr_004_166110	NM_001075116.1 ; Dr.46856	1	1	ENSDART00000062066	0	1	48237	NM_001075116.1	NM_001075116	si:dkey-177p2.6	ENSDARG00000042322	568712	si:dkey-177p2.6	Dr.46856	si:dkey-177p2.6	si:dkey-177p2.6	si:dkey-177p2.6	ZDB-GENE-030131-5926	si:dkey-177p2.6	1	2	1	1	1	2	12111	20	27048710	27063751
MAD_Dr_004_503644	OTTDART00000008949	3	1	gi|503644 ; gi|175049 ; gi|166346	1	1	-2	NA	NA	NA	ENSDARG00000014361	406412	NA	NA	NA	NA	transmembrane BAX inhibitor motif containing 4	ZDB-GENE-040426-2152	tmbim4	1	2	1	1	1	2	12111	4	12972406	12980076
MAD_Dr_004_167936	XM_679962.3 ; Dr.48854	0	1		0	1	50869	XM_679962.3	XM_679962	NA	ENSDARG00000090625	-	NA	Dr.48854	NA	NA	NA	NA	NA	1	2	1	1	1	2	12111	3	32440215	32451660
MAD_Dr_004_169641	ENSDART00000033638	3	1	Dr.12508 ; NM_200408.1 ; OTTDART00000045167	0	1	53371	NA	NA	NA	ENSDARG00000025757	393380	NA	NA	NA	NA	zgc:64085	ZDB-GENE-040426-1362	tspan35	1	2	1	1	1	2	12111	3	14461499	14488599
MAD_Dr_004_168332	NM_001037566.1	1	0	Dr.44238	0	1	51435	NM_001037566.1	NM_001037566	thnsl2	ENSDARG00000032584	641568	threonine synthase-like 2 (S. cerevisiae)	NA	NA	NA	threonine synthase-like 2 (S. cerevisiae)	ZDB-GENE-051127-19	thnsl2	1	2	1	1	1	2	12111	5	71309874	71320710
MAD_Dr_004_181313	ENSDART00000007914	2	1	OTTDART00000035205 ; OTTDART00000035204	0	1	71874	NA	NA	NA	ENSDARG00000004692	-	NA	NA	NA	NA	zgc:101644	ZDB-GENE-041212-71	nabp1a	1	2	1	1	1	2	12111	9	24403791	24407498
MAD_Dr_004_169782	OTTDART00000029762	3	0	ENSDART00000062135 ; Dr.91458 ; NM_001005946.1	0	1	53719	NA	NA	NA	ENSDARG00000042379	449773	NA	NA	NA	NA	zgc:103681	ZDB-GENE-041010-17	zgc:103681	1	2	1	1	1	2	12111	15	16937668	16948890
MAD_Dr_004_169427	NM_001008599.1	0	-	-	0	1	53073	NM_001008599.1	NM_001008599	zgc:103559	ENSDARG00000038293	494056	zgc:103559	NA	NA	NA	zgc:103559	ZDB-GENE-041212-22	zgc:103559	1	2	1	1	1	2	12111	6	27136059	27305208
MAD_Dr_004_169638	ENSDART00000007997	1	1	OTTDART00000027201	0	1	53369	NA	NA	NA	ENSDARG00000004687	431754	NA	NA	NA	NA	acetyl-Coenzyme A acyltransferase 1	ZDB-GENE-040704-48	acaa1	1	2	1	1	1	2	12111	24	20180893	20188041
MAD_Dr_004_169686	NM_001111202.1 ; Dr.134538	2	1	ENSDART00000104782 ; OTTDART00000042265	0	1	53436	NM_001111202.1	NM_001111202	zgc:173570	ENSDARG00000037645	570101	zgc:173570	Dr.134538	zgc:173570	zgc:173570	zgc:173570	ZDB-GENE-090311-40	si:rp71-1k13.8	1	2	1	1	1	2	12111	23	16904720	16923172
MAD_Dr_004_170724	OTTDART00000029610	1	1	NM_001017862.1	0	1	55107	NA	NA	NA	ENSDARG00000008757	550560	NA	NA	NA	NA	ectonucleoside triphosphate diphosphohydrolase 6 (putative function)	ZDB-GENE-050417-412	entpd6	1	2	1	1	1	2	12111	17	21082465	21103739
MAD_Dr_004_170273	OTTDART00000043192	3	1	ENSDART00000079174 ; Dr.77530 ; NM_201203.1	0	1	54485	NA	NA	NA	ENSDARG00000056649	394178	NA	NA	NA	NA	HIV TAT specific factor 1	ZDB-GENE-040426-1578	htatsf1	1	2	1	1	1	2	12111	10	26691146	26705530
MAD_Dr_004_170386	NM_213236.1 ; Dr.76824	1	0	OTTDART00000018751	0	1	54638	NM_213236.1	NM_213236	ilf2	ENSDARG00000014591	406517	interleukin enhancer binding factor 2	Dr.76824	ilf2	interleukin enhancer binding factor 2	interleukin enhancer binding factor 2	ZDB-GENE-040426-2345	ilf2	1	2	1	1	1	2	12111	19	37914532	37921451
MAD_Dr_004_170620	OTTDART00000037237	0	-	-	0	1	54954	NA	NA	NA	ENSDARG00000010712	561324	NA	NA	NA	NA	NA	ZDB-GENE-070424-44	npffr1l3	1	2	1	1	1	2	12111	10	516901	530983
MAD_Dr_004_170947	OTTDART00000027876	1	1	ENSDART00000066269	0	1	55429	NA	NA	NA	ENSDARG00000045074	323573	NA	NA	NA	NA	NA	ZDB-GENE-030131-2293	arl4d	1	2	1	1	1	2	12111	12	27151699	27154397
MAD_Dr_004_170980	NM_200313.1 ; Dr.84280	0	1		0	1	5548	NM_200313.1	NM_200313	chd1l	ENSDARG00000015471	393283	chromodomain helicase DNA binding protein 1-like	Dr.84280	chd1l	chromodomain helicase DNA binding protein 1-like	chromodomain helicase DNA binding protein 1-like	ZDB-GENE-040426-892	chd1l	1	2	1	1	1	2	12111	6	36866233	36899693
MAD_Dr_004_171206	OTTDART00000042588	0	-	-	0	1	55890	NA	NA	NA	ENSDARG00000077513	799144	NA	NA	NA	NA	NA	ZDB-GENE-080204-75	ppp1r3da	1	2	1	1	1	2	12111	23	12225930	12227784
MAD_Dr_004_171363	NM_131333.1 ; Dr.558	2	1	OTTDART00000025212 ; ENSDART00000078763	0	1	56121	NM_131333.1	NM_131333	vsx1	ENSDARG00000056292	30598	visual system homeobox 1 homolog, chx10-like	Dr.558	vsx1	visual system homeobox 1 homolog, chx10-like	visual system homeobox 1 homolog, chx10-like	ZDB-GENE-990415-205	vsx1	1	2	1	1	1	2	12111	17	21043567	21046269
MAD_Dr_004_171652	Dr.133459	3	0	ENSDART00000106497 ; ENSDART00000073711 ; XM_001342556.2	0	1	56589	NA	NA	NA	ENSDARG00000051984	100002923	NA	Dr.133459	NA	NA	similar to Zinc finger protein 135 (Zinc finger protein 61) (Zinc finger protein 78-like 1)	NA	NA	1	2	1	1	1	2	12111	NA	NA	NA
MAD_Dr_004_171663	ENSDART00000105694	0	-	-	0	1	56604	NA	NA	NA	ENSDARG00000026090	393393	NA	NA	NA	NA	zgc:64213	ZDB-GENE-040426-1406	adprm	1	2	1	1	1	2	12111	12	90491	93198
MAD_Dr_004_171982	OTTDART00000029819	0	-	-	0	1	57150	NA	NA	NA	ENSDARG00000042727	641427	NA	NA	NA	NA	NA	ZDB-GENE-051113-108	exo5	1	2	1	1	1	2	12111	15	25149556	25158761
MAD_Dr_004_172720	OTTDART00000025287	2	0	NM_001103194.1 ; ENSDART00000109917	0	1	58242	NA	NA	NA	ENSDARG00000007745	406359	NA	NA	NA	NA	ubiquinol-cytochrome c reductase, Rieske iron-sulfur polypeptide 1	ZDB-GENE-040426-2060	uqcrfs1	1	2	1	1	1	2	12111	7	45128440	45131436
MAD_Dr_004_172732	NM_212565.1	1	0	OTTDART00000012601	0	1	58263	NM_212565.1	NM_212565	dusp5	ENSDARG00000019307	114436	dual specificity phosphatase 5	NA	NA	NA	dual specificity phosphatase 5	ZDB-GENE-010625-1	dusp5	1	2	1	1	1	2	12111	22	29962131	29973677
MAD_Dr_004_173250	OTTDART00000020111	3	0	ENSDART00000006058 ; Dr.104850 ; NM_199569.1	0	1	59027	NA	NA	NA	ENSDARG00000005827	321807	NA	NA	NA	NA	eukaryotic translation initiation factor 2, subunit 1 alpha, like	ZDB-GENE-030131-526	eif2s1a	1	2	1	1	1	2	12111	17	34296399	34306287
MAD_Dr_004_172801	ENSDART00000028887	0	-	-	0	1	58399	NA	NA	NA	ENSDARG00000025693	325931	NA	NA	NA	NA	TMEM9 domain family, member B	ZDB-GENE-030131-4656	tmem9b	1	2	1	1	1	2	12111	7	28288468	28294041
MAD_Dr_004_173648	NM_213395.1 ; ENSDART00000102436	1	0	Dr.27161	0	1	59609	NM_213395.1	NM_213395	spg21	ENSDARG00000007760	406704	spastic paraplegia 21 (H. sapiens)	NA	NA	NA	spastic paraplegia 21 (H. sapiens)	ZDB-GENE-040426-2722	spg21	1	2	1	1	1	2	12111	7	13373206	13395853
MAD_Dr_004_173799	ENSDART00000052942	0	-	-	0	1	59824	NA	NA	NA	ENSDARG00000036445	554550	NA	NA	NA	NA	zgc:113025	ZDB-GENE-050417-12	serpinh2	1	2	1	1	1	2	12111	7	21006530	21043930
MAD_Dr_004_174195	NM_001077273.1 ; Dr.113685	1	1	ENSDART00000090401	0	1	60420	NM_001077273.1	NM_001077273	zgc:154141	ENSDARG00000062471	768127	zgc:154141	Dr.113685	zgc:154141	zgc:154141	zgc:154141	ZDB-GENE-061013-164	fam19a4b	1	2	1	1	1	2	12111	11	17462344	17579352
MAD_Dr_004_174558	XM_001333577.2	0	-	-	0	1	60956	XM_001333577.2	XM_001333577	NA	ENSDARG00000077166	-	NA	NA	NA	NA	NA	NA	NA	1	2	1	1	1	2	12111	14	25950443	25968487
MAD_Dr_004_174913	NM_001166258.1	0	-	-	0	1	61465	NM_001166258.1	NM_001166258	ccdc90b	ENSDARG00000044626	100149897	coiled-coil domain containing 90B	NA	NA	NA	coiled-coil domain containing 90B; similar to coiled-coil domain containing 90B	ZDB-GENE-040724-162	ccdc90b	1	2	1	1	1	2	12111	21	22852284	22855519
MAD_Dr_004_185143	ENSDART00000052123	1	1	OTTDART00000028452	0	1	78015	NA	NA	NA	ENSDARG00000035905	541392	NA	NA	NA	NA	solute carrier family 25, member 44 b	ZDB-GENE-050320-89	slc25a44b	1	2	1	1	1	2	12111	7	48025066	48030641
MAD_Dr_004_175361	NM_205721.1	2	0	XM_001918860.1 ; Dr.76839	0	1	62146	NM_205721.1	NM_205721	pdcl3	ENSDARG00000009449	403034	phosducin-like 3	NA	NA	NA	hypothetical protein LOC100149967; phosducin-like 3	ZDB-GENE-040322-1	pdcl3	1	2	1	1	1	2	12111	NA	NA	NA
MAD_Dr_004_179251	NM_001099258.1 ; Dr.117818	2	0	ENSDART00000031856 ; OTTDART00000039279	0	1	68235	NM_001099258.1	NM_001099258	zgc:165526	ENSDARG00000023373	100093705	zgc:165526	Dr.117818	zgc:165526	zgc:165526	zgc:165526	ZDB-GENE-070620-15	lppr5b	1	2	1	1	1	2	12111	NA	NA	NA
MAD_Dr_004_175604	ENSDART00000080479	2	1	Dr.119495 ; XM_001345664.2	0	1	62550	NA	NA	NA	ENSDARG00000057731	100332111	NA	NA	NA	NA	NA	NA	NA	1	2	1	1	1	2	12111	NA	NA	NA
MAD_Dr_004_175669	Dr.150684	1	0	NM_213544.1	0	1	62639	NA	NA	NA	ENSDARG00000003308	407073	NA	Dr.150684	ttc35	tetratricopeptide repeat domain 35	tetratricopeptide repeat domain 35	ZDB-GENE-040625-82	emc2	1	2	1	1	1	2	12111	16	38709443	38779574
MAD_Dr_004_176428	NM_001002107.1	1	0	XM_001330832.2	0	1	63785	NM_001002107.1	NM_001002107	nudt15	ENSDARG00000022461	415197	nudix (nucleoside diphosphate linked moiety X)-typ	NA	NA	NA	hypothetical LOC791620; nudix (nucleoside diphosphate linked moiety X)-type motif 15	ZDB-GENE-040625-95	nudt15	1	2	1	1	1	2	12111	6	9793424	9801902
MAD_Dr_004_178064	ENSDART00000023549	3	1	ENSDART00000042056 ; Dr.78259 ; NM_001002681.1	0	1	66304	NA	NA	NA	ENSDARG00000017728	436954	NA	NA	NA	NA	zgc:86841	ZDB-GENE-040718-430	phb2b	1	2	1	1	1	2	12111	6	29716568	29723729
MAD_Dr_004_177511	NM_001013489.1	1	1	XM_696586.3	0	1	65405	NM_001013489.1	NM_001013489	zgc:113336	ENSDARG00000043303	541362	zgc:113336	NA	NA	NA	zgc:113336; hypothetical LOC554949	ZDB-GENE-050320-55	zgc:113336	1	2	1	1	1	2	12111	NA	NA	NA
MAD_Dr_004_177956	OTTDART00000028380	0	-	-	0	1	66154	NA	NA	NA	ENSDARG00000039354	436865	NA	NA	NA	NA	NA	ZDB-GENE-040718-334	ska1	1	2	1	1	1	2	12111	10	17585842	17593497
MAD_Dr_004_178102	ENSDART00000081244	1	1	OTTDART00000024130	0	1	66358	NA	NA	NA	ENSDARG00000058375	553132	NA	NA	NA	NA	synaptonemal complex central element protein 2	ZDB-GENE-050512-1	syce2	1	2	1	1	1	2	12111	NA	NA	NA
[truncated: 486 more rows]
